# Supplementary material for: Transcriptomic analysis of primary nasal epithelial cells reveals altered interferon signalling in preterm birth survivors at one year of age
Source: Front Cell Dev Biol. 2024 Jul 24;12:1399005. doi: 10.3389/fcell.2024.1399005 (PMC11303191; doi:10.3389/fcell.2024.1399005)
Supplement: Supplementary file 1 [file Table2.XLSX]

## Sheet: Exvivo Reactome Upregulated
ID	Description	GeneRatio	BgRatio	pvalue	p.adjust	qvalue	geneID	Count
R-HSA-156842	Eukaryotic Translation Elongation	40/296	93/10899	1.48703e-38	1.42904e-35	1.20215e-35	RPL7/RPL21/EEF1A1/RPS27/RPS7/RPS3A/RPL18A/RPL6/RPS27A/RPL7A/RPS2/RPL10/RPSA/RPL23A/RPL41/RPL12/EEF1B2/RPL13A/RPL14/RPL10A/RPL29/RPS25/RPL24/RPL9/RPS15/RPS20/RPL4/RPS28/RPS26/RPS15A/RPL22/RPL27A/RPL23/RPLP1/RPS8/RPS23/RPL13/RPLP0/RPS18/RPL3	40
R-HSA-156902	Peptide chain elongation	39/296	89/10899	5.38748e-38	2.58868e-35	2.17767e-35	RPL7/RPL21/EEF1A1/RPS27/RPS7/RPS3A/RPL18A/RPL6/RPS27A/RPL7A/RPS2/RPL10/RPSA/RPL23A/RPL41/RPL12/RPL13A/RPL14/RPL10A/RPL29/RPS25/RPL24/RPL9/RPS15/RPS20/RPL4/RPS28/RPS26/RPS15A/RPL22/RPL27A/RPL23/RPLP1/RPS8/RPS23/RPL13/RPLP0/RPS18/RPL3	39
R-HSA-192823	Viral mRNA Translation	38/296	89/10899	1.6878e-36	5.40658e-34	4.54817e-34	RPL7/RPL21/RPS27/RPS7/RPS3A/RPL18A/RPL6/RPS27A/RPL7A/RPS2/RPL10/RPSA/RPL23A/RPL41/RPL12/RPL13A/RPL14/RPL10A/RPL29/RPS25/RPL24/RPL9/RPS15/RPS20/RPL4/RPS28/RPS26/RPS15A/RPL22/RPL27A/RPL23/RPLP1/RPS8/RPS23/RPL13/RPLP0/RPS18/RPL3	38
R-HSA-2408557	Selenocysteine synthesis	38/296	93/10899	1.31522e-35	2.52786e-33	2.12651e-33	RPL7/RPL21/RPS27/RPS7/RPS3A/RPL18A/RPL6/RPS27A/RPL7A/RPS2/RPL10/RPSA/RPL23A/RPL41/RPL12/RPL13A/RPL14/RPL10A/RPL29/RPS25/RPL24/RPL9/RPS15/RPS20/RPL4/RPS28/RPS26/RPS15A/RPL22/RPL27A/RPL23/RPLP1/RPS8/RPS23/RPL13/RPLP0/RPS18/RPL3	38
R-HSA-72764	Eukaryotic Translation Termination	38/296	93/10899	1.31522e-35	2.52786e-33	2.12651e-33	RPL7/RPL21/RPS27/RPS7/RPS3A/RPL18A/RPL6/RPS27A/RPL7A/RPS2/RPL10/RPSA/RPL23A/RPL41/RPL12/RPL13A/RPL14/RPL10A/RPL29/RPS25/RPL24/RPL9/RPS15/RPS20/RPL4/RPS28/RPS26/RPS15A/RPL22/RPL27A/RPL23/RPLP1/RPS8/RPS23/RPL13/RPLP0/RPS18/RPL3	38
R-HSA-72689	Formation of a pool of free 40S subunits	39/296	101/10899	2.24403e-35	3.59419e-33	3.02354e-33	RPL7/RPL21/RPS27/RPS7/RPS3A/RPL18A/RPL6/RPS27A/RPL7A/RPS2/RPL10/RPSA/RPL23A/RPL41/RPL12/RPL13A/RPL14/RPL10A/RPL29/RPS25/RPL24/RPL9/RPS15/RPS20/RPL4/RPS28/RPS26/RPS15A/RPL22/RPL27A/EIF3F/RPL23/RPLP1/RPS8/RPS23/RPL13/RPLP0/RPS18/RPL3	39
R-HSA-975956	Nonsense Mediated Decay (NMD) independent of the Exon Junction Complex (EJC)	38/296	95/10899	3.51045e-35	4.81935e-33	4.05418e-33	RPL7/RPL21/RPS27/RPS7/RPS3A/RPL18A/RPL6/RPS27A/RPL7A/RPS2/RPL10/RPSA/RPL23A/RPL41/RPL12/RPL13A/RPL14/RPL10A/RPL29/RPS25/RPL24/RPL9/RPS15/RPS20/RPL4/RPS28/RPS26/RPS15A/RPL22/RPL27A/RPL23/RPLP1/RPS8/RPS23/RPL13/RPLP0/RPS18/RPL3	38
R-HSA-156827	L13a-mediated translational silencing of Ceruloplasmin expression	40/296	111/10899	7.47861e-35	8.98369e-33	7.55734e-33	RPL7/RPL21/RPS27/RPS7/RPS3A/RPL18A/RPL6/RPS27A/RPL7A/RPS2/RPL10/RPSA/RPL23A/RPL41/RPL12/RPL13A/RPL14/RPL10A/RPL29/EIF4B/RPS25/RPL24/RPL9/RPS15/RPS20/RPL4/RPS28/RPS26/RPS15A/RPL22/RPL27A/EIF3F/RPL23/RPLP1/RPS8/RPS23/RPL13/RPLP0/RPS18/RPL3	40
R-HSA-72706	GTP hydrolysis and joining of the 60S ribosomal subunit	40/296	112/10899	1.13644e-34	1.21347e-32	1.0208e-32	RPL7/RPL21/RPS27/RPS7/RPS3A/RPL18A/RPL6/RPS27A/RPL7A/RPS2/RPL10/RPSA/RPL23A/RPL41/RPL12/RPL13A/RPL14/RPL10A/RPL29/EIF4B/RPS25/RPL24/RPL9/RPS15/RPS20/RPL4/RPS28/RPS26/RPS15A/RPL22/RPL27A/EIF3F/RPL23/RPLP1/RPS8/RPS23/RPL13/RPLP0/RPS18/RPL3	40
R-HSA-9633012	Response of EIF2AK4 (GCN2) to amino acid deficiency	38/296	101/10899	5.68595e-34	5.4642e-32	4.59664e-32	RPL7/RPL21/RPS27/RPS7/RPS3A/RPL18A/RPL6/RPS27A/RPL7A/RPS2/RPL10/RPSA/RPL23A/RPL41/RPL12/RPL13A/RPL14/RPL10A/RPL29/RPS25/RPL24/RPL9/RPS15/RPS20/RPL4/RPS28/RPS26/RPS15A/RPL22/RPL27A/RPL23/RPLP1/RPS8/RPS23/RPL13/RPLP0/RPS18/RPL3	38
R-HSA-72613	Eukaryotic Translation Initiation	40/296	119/10899	1.8643e-33	1.49299e-31	1.25595e-31	RPL7/RPL21/RPS27/RPS7/RPS3A/RPL18A/RPL6/RPS27A/RPL7A/RPS2/RPL10/RPSA/RPL23A/RPL41/RPL12/RPL13A/RPL14/RPL10A/RPL29/EIF4B/RPS25/RPL24/RPL9/RPS15/RPS20/RPL4/RPS28/RPS26/RPS15A/RPL22/RPL27A/EIF3F/RPL23/RPLP1/RPS8/RPS23/RPL13/RPLP0/RPS18/RPL3	40
R-HSA-72737	Cap-dependent Translation Initiation	40/296	119/10899	1.8643e-33	1.49299e-31	1.25595e-31	RPL7/RPL21/RPS27/RPS7/RPS3A/RPL18A/RPL6/RPS27A/RPL7A/RPS2/RPL10/RPSA/RPL23A/RPL41/RPL12/RPL13A/RPL14/RPL10A/RPL29/EIF4B/RPS25/RPL24/RPL9/RPS15/RPS20/RPL4/RPS28/RPS26/RPS15A/RPL22/RPL27A/EIF3F/RPL23/RPLP1/RPS8/RPS23/RPL13/RPLP0/RPS18/RPL3	40
R-HSA-1799339	SRP-dependent cotranslational protein targeting to membrane	39/296	112/10899	2.55657e-33	1.88989e-31	1.58983e-31	RPL7/RPL21/RPS27/RPS7/RPS3A/RPL18A/RPL6/RPS27A/RPL7A/RPS2/RPL10/RPSA/RPL23A/RPL41/RPL12/RPL13A/RPL14/RPL10A/RPL29/RPS25/RPL24/RPL9/RPS15/RPS20/RPL4/RPS28/RPS26/RPS15A/RPL22/RPL27A/RPL23/RPLP1/RPS8/RPS23/SPCS2/RPL13/RPLP0/RPS18/RPL3	39
R-HSA-927802	Nonsense-Mediated Decay (NMD)	39/296	115/10899	8.36851e-33	5.36142e-31	4.51019e-31	RPL7/RPL21/RPS27/RPS7/RPS3A/RPL18A/RPL6/RPS27A/RPL7A/RPS2/RPL10/RPSA/RPL23A/RPL41/RPL12/RPL13A/RPL14/RPL10A/RPL29/RPS25/RPL24/RPL9/RPS15/RPS20/RPL4/UPF3A/RPS28/RPS26/RPS15A/RPL22/RPL27A/RPL23/RPLP1/RPS8/RPS23/RPL13/RPLP0/RPS18/RPL3	39
R-HSA-975957	Nonsense Mediated Decay (NMD) enhanced by the Exon Junction Complex (EJC)	39/296	115/10899	8.36851e-33	5.36142e-31	4.51019e-31	RPL7/RPL21/RPS27/RPS7/RPS3A/RPL18A/RPL6/RPS27A/RPL7A/RPS2/RPL10/RPSA/RPL23A/RPL41/RPL12/RPL13A/RPL14/RPL10A/RPL29/RPS25/RPL24/RPL9/RPS15/RPS20/RPL4/UPF3A/RPS28/RPS26/RPS15A/RPL22/RPL27A/RPL23/RPLP1/RPS8/RPS23/RPL13/RPLP0/RPS18/RPL3	39
R-HSA-9010553	Regulation of expression of SLITs and ROBOs	44/296	171/10899	3.85113e-31	2.31308e-29	1.94583e-29	RPL7/RPL21/RPS27/RPS7/RPS3A/RPL18A/RPL6/RPS27A/RPL7A/RPS2/RPL10/RPSA/RPL23A/RPL41/RPL12/PSMC1/RPL13A/RPL14/RPL10A/RPL29/RPS25/RPL24/RPL9/RPS15/RPS20/RPL4/UPF3A/RPS28/RPS26/RPS15A/RPL22/RPL27A/RPL23/RPLP1/RPS8/RPS23/RPL13/RPLP0/RPS18/RPL3/UBB/COL4A5/SLIT2/UBC	44
R-HSA-2408522	Selenoamino acid metabolism	38/296	118/10899	5.24619e-31	2.96564e-29	2.49478e-29	RPL7/RPL21/RPS27/RPS7/RPS3A/RPL18A/RPL6/RPS27A/RPL7A/RPS2/RPL10/RPSA/RPL23A/RPL41/RPL12/RPL13A/RPL14/RPL10A/RPL29/RPS25/RPL24/RPL9/RPS15/RPS20/RPL4/RPS28/RPS26/RPS15A/RPL22/RPL27A/RPL23/RPLP1/RPS8/RPS23/RPL13/RPLP0/RPS18/RPL3	38
R-HSA-168273	Influenza Viral RNA Transcription and Replication	39/296	135/10899	9.14793e-30	4.88398e-28	4.10854e-28	RPL7/RPL21/RPS27/RPS7/RPS3A/RPL18A/RPL6/RPS27A/RPL7A/RPS2/RPL10/RPSA/RPL23A/RPL41/RPL12/RPL13A/RPL14/RPL10A/RPL29/RPS25/RPL24/RPL9/RPS15/RPS20/RPL4/RPS28/RPS26/RPS15A/RPL22/RPL27A/RPL23/RPLP1/RPS8/RPS23/RPL13/RPLP0/RPS18/RPL3/POM121	39
R-HSA-376176	Signaling by ROBO receptors	46/296	218/10899	1.94441e-28	9.83464e-27	8.27318e-27	RPL7/RPL21/RPS27/RPS7/RPS3A/RPL18A/RPL6/RPS27A/RPL7A/RPS2/RPL10/RPSA/RPL23A/RPL41/RPL12/PSMC1/RPL13A/RPL14/RPL10A/RPL29/RPS25/RPL24/RPL9/RPS15/RPS20/RPL4/UPF3A/RPS28/RPS26/RPS15A/RPL22/RPL27A/RPL23/RPLP1/RPS8/RPS23/RPL13/RPLP0/RPS18/RPL3/SRGAP3/UBB/ARHGAP39/COL4A5/SLIT2/UBC	46
R-HSA-168255	Influenza Infection	39/296	156/10899	3.87137e-27	1.77161e-25	1.49033e-25	RPL7/RPL21/RPS27/RPS7/RPS3A/RPL18A/RPL6/RPS27A/RPL7A/RPS2/RPL10/RPSA/RPL23A/RPL41/RPL12/RPL13A/RPL14/RPL10A/RPL29/RPS25/RPL24/RPL9/RPS15/RPS20/RPL4/RPS28/RPS26/RPS15A/RPL22/RPL27A/RPL23/RPLP1/RPS8/RPS23/RPL13/RPLP0/RPS18/RPL3/POM121	39
R-HSA-9711097	Cellular response to starvation	39/296	156/10899	3.87137e-27	1.77161e-25	1.49033e-25	RPL7/RPL21/RPS27/RPS7/RPS3A/RPL18A/RPL6/RPS27A/RPL7A/RPS2/RPL10/RPSA/RPL23A/RPL41/RPL12/RPL13A/RPL14/RPL10A/RPL29/RPS25/RPL24/RPL9/RPS15/RPS20/RPL4/RPS28/RPS26/RPS15A/RPL22/RPL27A/RPL23/RPLP1/RPS8/RPS23/RPL13/RPLP0/RPS18/RPL3/ATP6V1B1	39
R-HSA-6791226	Major pathway of rRNA processing in the nucleolus and cytosol	38/296	184/10899	3.199e-23	1.39738e-21	1.17552e-21	RPL7/RPL21/RPS27/RPS7/RPS3A/RPL18A/RPL6/RPS27A/RPL7A/RPS2/RPL10/RPSA/RPL23A/RPL41/RPL12/RPL13A/RPL14/RPL10A/RPL29/RPS25/RPL24/RPL9/RPS15/RPS20/RPL4/RPS28/RPS26/RPS15A/RPL22/RPL27A/RPL23/RPLP1/RPS8/RPS23/RPL13/RPLP0/RPS18/RPL3	38
R-HSA-8868773	rRNA processing in the nucleus and cytosol	38/296	194/10899	2.36824e-22	9.89514e-21	8.32408e-21	RPL7/RPL21/RPS27/RPS7/RPS3A/RPL18A/RPL6/RPS27A/RPL7A/RPS2/RPL10/RPSA/RPL23A/RPL41/RPL12/RPL13A/RPL14/RPL10A/RPL29/RPS25/RPL24/RPL9/RPS15/RPS20/RPL4/RPS28/RPS26/RPS15A/RPL22/RPL27A/RPL23/RPLP1/RPS8/RPS23/RPL13/RPLP0/RPS18/RPL3	38
R-HSA-72312	rRNA processing	38/296	204/10899	1.54688e-21	6.19397e-20	5.21055e-20	RPL7/RPL21/RPS27/RPS7/RPS3A/RPL18A/RPL6/RPS27A/RPL7A/RPS2/RPL10/RPSA/RPL23A/RPL41/RPL12/RPL13A/RPL14/RPL10A/RPL29/RPS25/RPL24/RPL9/RPS15/RPS20/RPL4/RPS28/RPS26/RPS15A/RPL22/RPL27A/RPL23/RPLP1/RPS8/RPS23/RPL13/RPLP0/RPS18/RPL3	38
R-HSA-72766	Translation	43/296	291/10899	3.4908e-20	1.34186e-18	1.12881e-18	RPL7/RPL21/EEF1A1/RPS27/RPS7/RPS3A/RPL18A/RPL6/RPS27A/RPL7A/RPS2/RPL10/RPSA/RPL23A/RPL41/RPL12/EEF1B2/RPL13A/RPL14/RPL10A/RPL29/EIF4B/RPS25/RPL24/RPL9/RPS15/RPS20/RPL4/RPS28/RPS26/RPS15A/RPL22/RPL27A/EIF3F/RPL23/RPLP1/RPS8/RPS23/SPCS2/RPL13/RPLP0/RPS18/RPL3	43
R-HSA-71291	Metabolism of amino acids and derivatives	48/296	374/10899	8.08063e-20	2.98673e-18	2.51252e-18	RPL7/RPL21/RPS27/RPS7/RPS3A/RPL18A/RPL6/RPS27A/RPL7A/RPS2/RPL10/RPSA/RPL23A/RPL41/RPL12/PSMC1/RPL13A/RPL14/RPL10A/RPL29/RPS25/RPL24/RPL9/RPS15/RPS20/RPL4/RPS28/RPS26/RPS15A/RPL22/RPL27A/SMS/RPL23/RPLP1/RPS8/RPS23/RPL13/RPLP0/RPS18/RPL3/AMT/DUOX1/PHGDH/AZIN2/AFMID/PSPH/ALDH7A1/CKB	48
R-HSA-9735869	SARS-CoV-1 modulates host translation machinery	17/296	36/10899	8.13847e-18	2.89669e-16	2.43678e-16	EEF1A1/RPS27/RPS7/RPS3A/RPS27A/HNRNPA1/RPS2/RPSA/RPS25/RPS15/RPS20/RPS28/RPS26/RPS15A/RPS8/RPS23/RPS18	17
R-HSA-9692914	SARS-CoV-1-host interactions	21/296	95/10899	6.38386e-14	2.19103e-12	1.84316e-12	EEF1A1/RPS27/RPS7/RPS3A/PPIA/RPS27A/HNRNPA1/RPS2/RPSA/NPM1/RPS25/RPS15/RPS20/RPS28/RPS26/RPS15A/RPS8/RPS23/RPS18/UBB/UBC	21
R-HSA-72649	Translation initiation complex formation	17/296	58/10899	1.09042e-13	3.49298e-12	2.9384e-12	RPS27/RPS7/RPS3A/RPS27A/RPS2/RPSA/EIF4B/RPS25/RPS15/RPS20/RPS28/RPS26/RPS15A/EIF3F/RPS8/RPS23/RPS18	17
R-HSA-72702	Ribosomal scanning and start codon recognition	17/296	58/10899	1.09042e-13	3.49298e-12	2.9384e-12	RPS27/RPS7/RPS3A/RPS27A/RPS2/RPSA/EIF4B/RPS25/RPS15/RPS20/RPS28/RPS26/RPS15A/EIF3F/RPS8/RPS23/RPS18	17
R-HSA-9754678	SARS-CoV-2 modulates host translation machinery	16/296	50/10899	1.25427e-13	3.88824e-12	3.2709e-12	RPS27/RPS7/RPS3A/RPS27A/RPS2/RPSA/RPS25/RPS15/RPS20/RPS28/RPS26/RPS15A/RPS8/RPS23/RPS18/SNRPG	16
R-HSA-72662	Activation of the mRNA upon binding of the cap-binding complex and eIFs, and subsequent binding to 43S	17/296	59/10899	1.49468e-13	4.48872e-12	3.77604e-12	RPS27/RPS7/RPS3A/RPS27A/RPS2/RPSA/EIF4B/RPS25/RPS15/RPS20/RPS28/RPS26/RPS15A/EIF3F/RPS8/RPS23/RPS18	17
R-HSA-72695	Formation of the ternary complex, and subsequently, the 43S complex	16/296	51/10899	1.7834e-13	5.19348e-12	4.3689e-12	RPS27/RPS7/RPS3A/RPS27A/RPS2/RPSA/RPS25/RPS15/RPS20/RPS28/RPS26/RPS15A/EIF3F/RPS8/RPS23/RPS18	16
R-HSA-9678108	SARS-CoV-1 Infection	22/296	141/10899	2.66506e-11	7.53271e-10	6.33673e-10	EEF1A1/RPS27/RPS7/RPS3A/PPIA/RPS27A/HNRNPA1/RPS2/RPSA/NPM1/RPS25/RPS15/RPS20/RPS28/RPS26/RPS15A/RPS8/RPS23/RPS18/UBB/ST6GALNAC2/UBC	22
R-HSA-5617833	Cilium Assembly	24/296	201/10899	9.90844e-10	2.72057e-08	2.28863e-08	BBS5/CEP164/IFT140/PKD1/NPHP4/TUBA1A/TRAF3IP1/IFT122/CEP89/IFT172/INPP5E/MKS1/B9D2/ODF2/IFT43/DYNLL1/CNTRL/KIF24/CNGA4/UNC119B/IFT27/WDR19/NINL/DYNC2I1	24
R-HSA-1852241	Organelle biogenesis and maintenance	28/296	296/10899	8.06195e-09	2.15209e-07	1.8104e-07	ATP6/BBS5/ATP8/MTX1/CEP164/IFT140/PKD1/POLRMT/NPHP4/TUBA1A/TRAF3IP1/IFT122/CEP89/IFT172/INPP5E/MKS1/B9D2/ODF2/IFT43/DYNLL1/CNTRL/KIF24/CNGA4/UNC119B/IFT27/WDR19/NINL/DYNC2I1	28
R-HSA-5358351	Signaling by Hedgehog	17/296	149/10899	5.68092e-07	1.46187e-05	1.22977e-05	RPS27A/PSMC1/IQCE/IFT140/TULP3/TUBA1A/IFT122/UBB/IFT172/HHAT/FUZ/MKS1/ADCY9/UBC/CDON/GAS8/WDR19	17
R-HSA-9705683	SARS-CoV-2-host interactions	20/296	202/10899	5.78055e-07	1.46187e-05	1.22977e-05	RPS27/RPS7/RPS3A/RPS27A/RPS2/RPSA/RPS25/RPS15/RPS20/RPS28/RPS26/RPS15A/RPS8/RPS23/RPS18/SNRPG/HSP90AB1/POM121/UBB/UBC	20
R-HSA-5620924	Intraflagellar transport	10/296	54/10899	1.55801e-06	3.83909e-05	3.22955e-05	IFT140/TUBA1A/TRAF3IP1/IFT122/IFT172/IFT43/DYNLL1/IFT27/WDR19/DYNC2I1	10
R-HSA-9694516	SARS-CoV-2 Infection	23/296	298/10899	6.34807e-06	0.000152512	0.000128298	RPS27/RPS7/RPS3A/RPS27A/RPS2/RPSA/RPS25/RPS15/RPS20/RPS28/RPS26/RPS15A/RPS8/RPS23/RPS18/SNRPG/HSP90AB1/POM121/ZDHHC11/UBB/HSPG2/ST6GALNAC2/UBC	23
R-HSA-163200	Respiratory electron transport, ATP synthesis by chemiosmotic coupling, and heat production by uncoupling proteins.	14/296	127/10899	8.59246e-06	0.000201399	0.000169423	ND6/ATP6/SDHC/ND3/CYTB/COX2/COX1/ND1/ATP8/ND5/ND4/COX19/ND2/COX3	14
R-HSA-5610787	Hedgehog 'off' state	13/296	113/10899	1.13183e-05	0.000258974	0.000217857	RPS27A/PSMC1/IFT140/TULP3/TUBA1A/IFT122/UBB/IFT172/FUZ/MKS1/ADCY9/UBC/WDR19	13
R-HSA-9679506	SARS-CoV Infections	27/296	413/10899	2.12958e-05	0.000473403	0.000398241	EEF1A1/RPS27/RPS7/RPS3A/PPIA/RPS27A/HNRNPA1/RPS2/RPSA/NPM1/RPS25/RPS15/RPS20/RPS28/RPS26/RPS15A/RPS8/RPS23/RPS18/SNRPG/HSP90AB1/POM121/ZDHHC11/UBB/HSPG2/ST6GALNAC2/UBC	27
R-HSA-611105	Respiratory electron transport	12/296	103/10899	2.16751e-05	0.000473403	0.000398241	ND6/SDHC/ND3/CYTB/COX2/COX1/ND1/ND5/ND4/COX19/ND2/COX3	12
R-HSA-5620912	Anchoring of the basal body to the plasma membrane	11/296	98/10899	6.75272e-05	0.00144208	0.00121312	CEP164/NPHP4/TUBA1A/CEP89/MKS1/B9D2/ODF2/DYNLL1/CNTRL/KIF24/NINL	11
R-HSA-2565942	Regulation of PLK1 Activity at G2/M Transition	10/296	88/10899	0.00013016	0.00271921	0.00228748	RPS27A/CEP164/TUBA1A/UBB/PPP1R12B/ODF2/UBC/DYNLL1/CNTRL/NINL	10
R-HSA-5205685	PINK1-PRKN Mediated Mitophagy	5/296	22/10899	0.000257207	0.0051495	0.00433191	RPS27A/TOMM40/UBB/MAP1LC3A/UBC	5
R-HSA-9613829	Chaperone Mediated Autophagy	5/296	22/10899	0.000257207	0.0051495	0.00433191	EEF1A1/RPS27A/HSP90AB1/UBB/UBC	5
R-HSA-1428517	The citric acid (TCA) cycle and respiratory electron transport	14/296	178/10899	0.000349622	0.00685687	0.0057682	ND6/ATP6/SDHC/ND3/CYTB/COX2/COX1/ND1/ATP8/ND5/ND4/COX19/ND2/COX3	14
R-HSA-2214320	Anchoring fibril formation	4/296	15/10899	0.000574191	0.0108196	0.00910172	LAMC2/COL4A6/COL4A5/LAMA3	4
R-HSA-3134975	Regulation of innate immune responses to cytosolic DNA	4/296	15/10899	0.000574191	0.0108196	0.00910172	RPS27A/TRIM56/UBB/UBC	4
R-HSA-175474	Assembly Of The HIV Virion	4/296	16/10899	0.000749328	0.0135869	0.0114297	PPIA/RPS27A/UBB/UBC	4
R-HSA-2173791	TGF-beta receptor signaling in EMT (epithelial to mesenchymal transition)	4/296	16/10899	0.000749328	0.0135869	0.0114297	RPS27A/CGN/UBB/UBC	4
R-HSA-69275	G2/M Transition	14/296	196/10899	0.000915055	0.0162772	0.0136928	RPS27A/PSMC1/HSP90AB1/CEP164/CDK11B/TUBA1A/UBB/TUBG2/PPP1R12B/ODF2/UBC/DYNLL1/CNTRL/NINL	14
R-HSA-917937	Iron uptake and transport	7/296	58/10899	0.000931577	0.0162772	0.0136928	RPS27A/FTH1/SLC46A1/STEAP3/UBB/UBC/ATP6V1B1	7
R-HSA-5205647	Mitophagy	5/296	29/10899	0.000992698	0.0170275	0.014324	RPS27A/TOMM40/UBB/MAP1LC3A/UBC	5
R-HSA-453274	Mitotic G2-G2/M phases	14/296	198/10899	0.00100995	0.0170275	0.014324	RPS27A/PSMC1/HSP90AB1/CEP164/CDK11B/TUBA1A/UBB/TUBG2/PPP1R12B/ODF2/UBC/DYNLL1/CNTRL/NINL	14
R-HSA-3000171	Non-integrin membrane-ECM interactions	7/296	59/10899	0.00103287	0.0171136	0.0143964	LAMC2/COL4A6/HSPG2/COL4A5/ITGB5/DMD/LAMA3	7
R-HSA-3000157	Laminin interactions	5/296	30/10899	0.00116511	0.0189774	0.0159644	LAMC2/COL4A6/HSPG2/COL4A5/LAMA3	5
R-HSA-2173789	TGF-beta receptor signaling activates SMADs	6/296	46/10899	0.00143193	0.0229348	0.0192934	RPS27A/UBB/LTBP2/ITGB5/UBC/LTBP3	6
R-HSA-6804760	Regulation of TP53 Activity through Methylation	4/296	19/10899	0.00149646	0.0235754	0.0198323	RPS27A/L3MBTL1/UBB/UBC	4
R-HSA-380270	Recruitment of mitotic centrosome proteins and complexes	8/296	82/10899	0.00168091	0.0256405	0.0215696	CEP164/CDK11B/TUBA1A/TUBG2/ODF2/DYNLL1/CNTRL/NINL	8
R-HSA-380287	Centrosome maturation	8/296	82/10899	0.00168091	0.0256405	0.0215696	CEP164/CDK11B/TUBA1A/TUBG2/ODF2/DYNLL1/CNTRL/NINL	8
R-HSA-9006936	Signaling by TGFB family members	10/296	122/10899	0.00176987	0.0265757	0.0223562	RPS27A/YBX1/CGN/FSTL1/UBB/LTBP2/ITGB5/UBC/INHBB/LTBP3	10
R-HSA-937042	IRAK2 mediated activation of TAK1 complex	3/296	10/10899	0.00206495	0.0305295	0.0256823	RPS27A/UBB/UBC	3
R-HSA-211945	Phase I - Functionalization of compounds	9/296	106/10899	0.00233377	0.0339811	0.0285859	HSP90AB1/CYP2S1/CES1/CYP2A6/CYP4F11/CES2/CMBL/FDXR/CES3	9
R-HSA-446107	Type I hemidesmosome assembly	3/296	11/10899	0.00278257	0.0376627	0.0316829	LAMC2/KRT5/LAMA3	3
R-HSA-9014325	TICAM1,TRAF6-dependent induction of TAK1 complex	3/296	11/10899	0.00278257	0.0376627	0.0316829	RPS27A/UBB/UBC	3
R-HSA-9645460	Alpha-protein kinase 1 signaling pathway	3/296	11/10899	0.00278257	0.0376627	0.0316829	RPS27A/UBB/UBC	3
R-HSA-9664873	Pexophagy	3/296	11/10899	0.00278257	0.0376627	0.0316829	RPS27A/UBB/UBC	3
R-HSA-9708530	Regulation of BACH1 activity	3/296	11/10899	0.00278257	0.0376627	0.0316829	RPS27A/UBB/UBC	3
R-HSA-5696394	DNA Damage Recognition in GG-NER	5/296	38/10899	0.00343849	0.0458942	0.0386076	RPS27A/INO80B/UBB/RUVBL1/UBC	5
R-HSA-5689877	Josephin domain DUBs	3/296	12/10899	0.00363606	0.0470201	0.0395547	RPS27A/UBB/UBC	3
R-HSA-9013973	TICAM1-dependent activation of IRF3/IRF7	3/296	12/10899	0.00363606	0.0470201	0.0395547	RPS27A/UBB/UBC	3
R-HSA-5627123	RHO GTPases activate PAKs	4/296	24/10899	0.00368718	0.0470201	0.0395547	NF2/MYH10/PPP1R12B/MYLK	4
R-HSA-170834	Signaling by TGF-beta Receptor Complex	8/296	93/10899	0.00371855	0.0470201	0.0395547	RPS27A/YBX1/CGN/UBB/LTBP2/ITGB5/UBC/LTBP3	8

## Sheet: Exvivo Reactome Downregulated
ID	Description	GeneRatio	BgRatio	pvalue	p.adjust	qvalue	geneID	Count
R-HSA-446203	Asparagine N-linked glycosylation	65/1032	304/10899	1.93633e-10	2.63341e-07	2.38678e-07	KDELR2/ARF4/TMED7/TMED3/SEC24D/DCTN6/BET1/MGAT4A/CAPZA2/CMAS/NAPG/MAN2A1/MANEA/TGFA/RNF139/DERL1/YKT6/COG3/PPP6C/SEC24A/TFG/RAB1A/SLC17A5/TMED2/ARFGAP3/MAGT1/GOSR2/COG5/CNIH1/TRAPPC6B/NSF/UAP1/ST3GAL4/ALG6/CAPZA1/MAN1A1/LMAN1/RNF103/GMDS/PGM3/COPB1/SEC23A/NPL/SLC35C1/FPGT/SEL1L/GFPT1/DPM1/CTSC/EDEM3/ALG11/TUBA4A/KDELR3/CD55/FUT3/GNE/ALG14/FUT8/ST3GAL5/GNPNAT1/ST8SIA4/SLC35A1/UGGT2/B4GALT5/ST3GAL1	65
R-HSA-202430	Translocation of ZAP-70 to Immunological synapse	12/1032	19/10899	1.31231e-08	6.77816e-06	6.14336e-06	HLA-DQA1/PTPN22/HLA-DRB5/HLA-DRA/LCK/HLA-DPA1/HLA-DQB1/ZAP70/CD3D/CD3E/HLA-DRB1/HLA-DPB1	12
R-HSA-983169	Class I MHC mediated antigen processing & presentation	71/1032	381/10899	1.49518e-08	6.77816e-06	6.14336e-06	PSMA2/RBX1/ZNRF2/PSMA1/UBE2Q2/VAMP3/UBE2J1/UBE2D1/SEC24D/RNF217/UBE2K/RCHY1/UBE2W/UBE2F/UBE2G1/PSME4/UBE2B/ITGAV/SEC61G/UBA6/HECTD2/UBE2E1/SEC24A/B2M/FBXO30/LTN1/CHUK/MEX3C/LONRF1/RNF138/UBA3/FBXW7/FBXL3/CUL5/RNF19A/PSMD12/BTBD1/SEC23A/PJA2/PSMD5/CUL3/SNAP23/ANAPC13/WWP1/HLA-C/LNPEP/CDC27/CD36/UBE4A/PSMA3/ATG14/HLA-G/SMURF2/FBXL5/TAP2/UFL1/LMO7/MYD88/HLA-B/RNF19B/KCTD6/RNF114/FBXO11/PSMB8/CDC20/E…	71
R-HSA-202427	Phosphorylation of CD3 and TCR zeta chains	12/1032	22/10899	1.28535e-07	4.3702e-05	3.96092e-05	PAG1/HLA-DQA1/PTPN22/HLA-DRB5/HLA-DRA/LCK/HLA-DPA1/HLA-DQB1/CD3D/CD3E/HLA-DRB1/HLA-DPB1	12
R-HSA-8873719	RAB geranylgeranylation	21/1032	65/10899	2.72471e-07	7.41121e-05	6.71712e-05	RAB2A/RAB5C/RAB33B/RAB27A/RAB8B/RAB27B/RAB10/RAB18/RAB11A/RAB9A/RABGGTB/RAB14/RAB5A/RAB22A/RAB1A/RAB12/RAB21/RAB37/PTP4A2/CHML/CHM	21
R-HSA-983170	Antigen Presentation: Folding, assembly and peptide loading of class I MHC	13/1032	29/10899	7.30925e-07	0.000165676	0.00015016	SEC24D/SEC24A/B2M/SEC23A/HLA-C/ATG14/HLA-G/TAP2/HLA-B/ERAP2/TAP1/HLA-F/HLA-E	13
R-HSA-948021	Transport to the Golgi and subsequent modification	39/1032	185/10899	1.25801e-06	0.000244413	0.000221523	KDELR2/ARF4/TMED7/TMED3/SEC24D/DCTN6/BET1/MGAT4A/CAPZA2/NAPG/MAN2A1/MANEA/TGFA/YKT6/COG3/PPP6C/SEC24A/TFG/RAB1A/TMED2/ARFGAP3/GOSR2/COG5/CNIH1/TRAPPC6B/NSF/ST3GAL4/CAPZA1/MAN1A1/LMAN1/COPB1/SEC23A/CTSC/TUBA4A/KDELR3/CD55/FUT3/FUT8/B4GALT5	39
R-HSA-202403	TCR signaling	29/1032	120/10899	1.65825e-06	0.000281902	0.000255501	PSMA2/PSMA1/UBE2D1/RIPK2/PSME4/PIK3CB/PAG1/CHUK/TAB2/PSMD12/PSMD5/NCK1/MALT1/PIK3CA/HLA-DQA1/PTPN22/PSMA3/BCL10/HLA-DRB5/HLA-DRA/LCK/HLA-DPA1/HLA-DQB1/ZAP70/PSMB8/CD3D/CD3E/HLA-DRB1/HLA-DPB1	29
R-HSA-389948	PD-1 signaling	11/1032	23/10899	2.41216e-06	0.000364504	0.000330367	CD274/HLA-DQA1/HLA-DRB5/HLA-DRA/LCK/HLA-DPA1/HLA-DQB1/CD3D/CD3E/HLA-DRB1/HLA-DPB1	11
R-HSA-202424	Downstream TCR signaling	25/1032	98/10899	3.00818e-06	0.000409112	0.000370798	PSMA2/PSMA1/UBE2D1/RIPK2/PSME4/PIK3CB/CHUK/TAB2/PSMD12/PSMD5/MALT1/PIK3CA/HLA-DQA1/PSMA3/BCL10/HLA-DRB5/HLA-DRA/LCK/HLA-DPA1/HLA-DQB1/PSMB8/CD3D/CD3E/HLA-DRB1/HLA-DPB1	25
R-HSA-877300	Interferon gamma signaling	23/1032	92/10899	1.06638e-05	0.00131843	0.00119496	CAMK2D/B2M/IFNGR1/HLA-C/HLA-DQA1/JAK2/HLA-G/HLA-DRB5/HLA-DRA/HLA-B/HLA-DPA1/IRF1/HLA-DQB1/IFNGR2/TRIM22/STAT1/TRIM31/HLA-F/GBP2/HLA-E/HLA-DRB1/GBP4/HLA-DPB1	23
R-HSA-6811442	Intra-Golgi and retrograde Golgi-to-ER traffic	39/1032	202/10899	1.17296e-05	0.00132935	0.00120485	KDELR2/ARF4/TMED7/TMED3/VAMP3/RAB33B/ARL1/DCTN6/CAPZA2/GALNT1/NAPG/VAMP4/MAN2A1/RAB18/RAB9A/YKT6/COG3/SURF4/RAB1A/TMED2/GOLGA5/ARFGAP3/NAA30/GOSR2/SCOC/COG5/KIF5B/NSF/RIC1/RINT1/CAPZA1/MAN1A1/COPB1/VPS54/RHOBTB3/TUBA4A/KDELR3/PLA2G4A/KIF21B	39
R-HSA-1236977	Endosomal/Vacuolar pathway	7/1032	11/10899	1.56887e-05	0.00164128	0.00148757	B2M/HLA-C/LNPEP/HLA-G/HLA-B/HLA-F/HLA-E	7
R-HSA-1236974	ER-Phagosome pathway	22/1032	90/10899	2.41338e-05	0.00234443	0.00212486	PSMA2/PSMA1/VAMP3/PSME4/SEC61G/B2M/CHUK/PSMD12/PSMD5/SNAP23/HLA-C/CD36/PSMA3/HLA-G/TAP2/MYD88/HLA-B/PSMB8/TAP1/TLR2/HLA-F/HLA-E	22
R-HSA-446193	Biosynthesis of the N-glycan precursor (dolichol lipid-linked oligosaccharide, LLO) and transfer to a nascent protein	20/1032	78/10899	2.66176e-05	0.00241333	0.00218732	CMAS/SLC17A5/UAP1/ST3GAL4/ALG6/GMDS/PGM3/NPL/SLC35C1/FPGT/GFPT1/DPM1/ALG11/GNE/ALG14/ST3GAL5/GNPNAT1/ST8SIA4/SLC35A1/ST3GAL1	20
R-HSA-1236975	Antigen processing-Cross presentation	24/1032	105/10899	3.46172e-05	0.00294246	0.00266689	PSMA2/PSMA1/VAMP3/PSME4/ITGAV/SEC61G/B2M/CHUK/PSMD12/PSMD5/SNAP23/HLA-C/LNPEP/CD36/PSMA3/HLA-G/TAP2/MYD88/HLA-B/PSMB8/TAP1/TLR2/HLA-F/HLA-E	24
R-HSA-202433	Generation of second messenger molecules	12/1032	34/10899	3.71622e-05	0.00297298	0.00269455	NCK1/HLA-DQA1/HLA-DRB5/HLA-DRA/LCK/HLA-DPA1/HLA-DQB1/ZAP70/CD3D/CD3E/HLA-DRB1/HLA-DPB1	12
R-HSA-199977	ER to Golgi Anterograde Transport	31/1032	154/10899	3.94272e-05	0.00297894	0.00269995	KDELR2/ARF4/TMED7/TMED3/SEC24D/DCTN6/BET1/CAPZA2/NAPG/TGFA/YKT6/COG3/PPP6C/SEC24A/TFG/RAB1A/TMED2/ARFGAP3/GOSR2/COG5/CNIH1/TRAPPC6B/NSF/CAPZA1/LMAN1/COPB1/SEC23A/CTSC/TUBA4A/KDELR3/CD55	31
R-HSA-446219	Synthesis of substrates in N-glycan biosythesis	17/1032	63/10899	5.24235e-05	0.00375242	0.00340099	CMAS/SLC17A5/UAP1/ST3GAL4/GMDS/PGM3/NPL/SLC35C1/FPGT/GFPT1/DPM1/GNE/ST3GAL5/GNPNAT1/ST8SIA4/SLC35A1/ST3GAL1	17
R-HSA-5663202	Diseases of signal transduction by growth factor receptors and second messengers	66/1032	433/10899	6.13081e-05	0.00416895	0.00377851	PSMA2/RBX1/PSMA1/EIF2AK3/CDKN1B/FGFR1OP2/CCNC/PPP2CA/PPP1CB/KRAS/MIB1/CAMK2D/KAT2B/KITLG/STRN/CREB1/RAP1A/TGFBR1/BIRC6/TGFA/PPM1B/RICTOR/TNKS2/PSME4/PPP1CC/TGFBR2/FRS2/QKI/TFG/NRAS/PIK3CB/TBL1XR1/CHUK/KIF5B/FBXW7/ADAM10/SHOC2/EML4/ESRP1/NF1/PSMD12/PPP2R5A/RBPJ/PTPN12/PSMD5/SEL1L/POLR2K/PIK3CA/AP3B1/JAK2/LYN/YES1/HDAC9/PSMA3/MET/PIM1/LMO7/LCK/FGFR2/KDM7A/DUSP6/FZD5/PSMB8/BIN2/STAT1/IRS2	66
R-HSA-6798695	Neutrophil degranulation	71/1032	482/10899	9.82569e-05	0.00636331	0.00576736	PSMA2/RAP2C/RAB5C/SCAMP1/NDUFC2/CD58/OSTF1/RAB27A/GYG1/ATP11B/RAP1A/RAB10/RAB18/TMEM30A/ITGAV/GOLGA7/LAMTOR3/GGH/LYZ/RAB14/SURF4/CD47/NRAS/LAMP2/B2M/MAGT1/PGM2/CSNK2B/ADAM10/CAND1/S100P/C6orf120/PSMD12/CPNE3/ASAH1/COPB1/SNAP23/ARPC5/ATP8A1/NHLRC3/CTSC/RAB37/HPSE/HLA-C/CD36/ENPP4/ACTR2/SLC15A4/CD55/DNAJC3/DDX3X/TMC6/SVIP/YPEL5/HLA-B/CKAP4/MGST1/GLIPR1/RHOF/TBC1D10C/TCIRG1/AGA/SERPINB3/HSPA1B/BIN2/…	71
R-HSA-983168	Antigen processing: Ubiquitination & Proteasome degradation	50/1032	309/10899	0.000107764	0.00666175	0.00603786	PSMA2/RBX1/ZNRF2/PSMA1/UBE2Q2/UBE2J1/UBE2D1/RNF217/UBE2K/RCHY1/UBE2W/UBE2F/UBE2G1/PSME4/UBE2B/UBA6/HECTD2/UBE2E1/FBXO30/LTN1/MEX3C/LONRF1/RNF138/UBA3/FBXW7/FBXL3/CUL5/RNF19A/PSMD12/BTBD1/PJA2/PSMD5/CUL3/ANAPC13/WWP1/LNPEP/CDC27/UBE4A/PSMA3/SMURF2/FBXL5/UFL1/LMO7/RNF19B/KCTD6/RNF114/FBXO11/PSMB8/CDC20/MYLIP	50
R-HSA-204005	COPII-mediated vesicle transport	17/1032	68/10899	0.000147703	0.00873373	0.00791579	SEC24D/BET1/NAPG/TGFA/YKT6/PPP6C/SEC24A/TFG/RAB1A/TMED2/GOSR2/CNIH1/TRAPPC6B/NSF/LMAN1/SEC23A/CTSC	17
R-HSA-432722	Golgi Associated Vesicle Biogenesis	15/1032	56/10899	0.000156542	0.0088707	0.00803993	RAB5C/ACBD3/TPD52/BLOC1S1/VAMP7/BLOC1S6/AP4E1/CPD/AP3B1/CLINT1/PIK3C2A/PICALM/TBC1D8B/TPD52L1/TFRC	15
R-HSA-388841	Costimulation by the CD28 family	17/1032	69/10899	0.00017899	0.00973705	0.00882514	PPP2CA/CD274/RICTOR/PPP2R5A/PIK3CA/HLA-DQA1/LYN/YES1/HLA-DRB5/HLA-DRA/LCK/HLA-DPA1/HLA-DQB1/CD3D/CD3E/HLA-DRB1/HLA-DPB1	17
R-HSA-68882	Mitotic Anaphase	40/1032	236/10899	0.000191502	0.010017	0.00907892	PSMA2/CHMP2B/PSMA1/UBE2D1/PPP2CA/BUB3/TAOK1/PSME4/TMPO/PPP1CC/NUP58/UBE2E1/TNPO1/SEH1L/LBR/PSMD12/PDS5A/PPP2R5A/PSMD5/NUP54/CDK1/SPDL1/CHMP3/LEMD3/STAG2/CDC27/PSMA3/TUBA4A/SPAST/CENPU/PMF1/XPO1/MAD2L1/SKA2/NDC1/ZWILCH/PSMB8/CDC20/CCNB1/ZWINT	40
R-HSA-2555396	Mitotic Metaphase and Anaphase	40/1032	237/10899	0.000209914	0.0105734	0.00958319	PSMA2/CHMP2B/PSMA1/UBE2D1/PPP2CA/BUB3/TAOK1/PSME4/TMPO/PPP1CC/NUP58/UBE2E1/TNPO1/SEH1L/LBR/PSMD12/PDS5A/PPP2R5A/PSMD5/NUP54/CDK1/SPDL1/CHMP3/LEMD3/STAG2/CDC27/PSMA3/TUBA4A/SPAST/CENPU/PMF1/XPO1/MAD2L1/SKA2/NDC1/ZWILCH/PSMB8/CDC20/CCNB1/ZWINT	40
R-HSA-8876198	RAB GEFs exchange GTP for GDP on RABs	20/1032	90/10899	0.000228622	0.0111045	0.0100645	DENND1B/RAB5C/RAB27A/RAB8B/RAB27B/RAB10/RAB18/TRAPPC13/RAB9A/RAB14/RAB5A/RAB1A/TRAPPC6B/RAB12/RIC1/RAB21/DENND6A/CHML/CHM/DENND4A	20
R-HSA-913531	Interferon Signaling	35/1032	200/10899	0.000252625	0.0118473	0.0107377	CAMK2D/PPM1B/NUP58/UBE2E1/B2M/SEH1L/IFNGR1/PDE12/NUP54/KPNA5/IFNAR1/HLA-C/HLA-DQA1/JAK2/HLA-G/HLA-DRB5/IFIT5/HLA-DRA/NDC1/HLA-B/ABCE1/HLA-DPA1/IRF1/HLA-DQB1/PSMB8/IFNGR2/TRIM22/STAT1/TRIM31/HLA-F/GBP2/HLA-E/HLA-DRB1/GBP4/HLA-DPB1	35
R-HSA-9669938	Signaling by KIT in disease	8/1032	20/10899	0.000280538	0.0123075	0.0111549	KRAS/NRAS/PIK3CA/JAK2/LYN/YES1/LCK/STAT1	8
R-HSA-9670439	Signaling by phosphorylated juxtamembrane, extracellular and kinase domain KIT mutants	8/1032	20/10899	0.000280538	0.0123075	0.0111549	KRAS/NRAS/PIK3CA/JAK2/LYN/YES1/LCK/STAT1	8
R-HSA-5223345	Miscellaneous transport and binding events	9/1032	26/10899	0.000417354	0.0174805	0.0158434	LRRC8D/MAGT1/NIPA2/MMGT1/MRS2/LRRC8B/LRRC8A/NIPAL2/AZGP1	9
R-HSA-6807878	COPI-mediated anterograde transport	21/1032	101/10899	0.00042416	0.0174805	0.0158434	KDELR2/ARF4/TMED7/TMED3/DCTN6/BET1/CAPZA2/NAPG/YKT6/COG3/RAB1A/TMED2/ARFGAP3/GOSR2/COG5/NSF/CAPZA1/COPB1/TUBA4A/KDELR3/CD55	21
R-HSA-6811440	Retrograde transport at the Trans-Golgi-Network	13/1032	49/10899	0.000469789	0.0187915	0.0170317	VAMP3/ARL1/NAPG/VAMP4/RAB9A/COG3/NAA30/SCOC/COG5/NSF/RIC1/VPS54/RHOBTB3	13
R-HSA-9007101	Rab regulation of trafficking	24/1032	124/10899	0.000521833	0.0202482	0.0183519	DENND1B/RAB5C/RAB33B/RAB27A/RAB8B/RAB27B/RAB10/RAB18/RAB11A/TRAPPC13/RAB9A/RAB14/RAB5A/RAB1A/TBC1D15/TRAPPC6B/RAB12/RIC1/RAB21/DENND6A/CHML/CHM/DENND4A/TBC1D10C	24
R-HSA-9012999	RHO GTPase cycle	64/1032	449/10899	0.000535982	0.0202482	0.0183519	ARHGAP20/CDC42SE2/VAMP3/WASL/GNA13/RHOC/SLC4A7/PGRMC2/YKT6/TMPO/COPS2/TRA2B/FRS2/ARHGDIB/TMEM87A/ECT2/PHIP/ARAP2/FAM13B/NCKAP1/ARFGAP3/PKN2/ARHGEF3/LBR/FAM135A/ARHGAP12/LMAN1/SOS2/NCK1/RND3/CUL3/SNAP23/SLK/TMOD3/ARHGEF16/CPD/PIK3CA/LEMD3/FAM91A1/ANLN/CDC42BPA/FAM169A/ARHGEF6/ARHGAP29/MPP7/PICALM/SH3BP1/LCK/CKAP4/ABCD3/GMIP/SOWAHC/DOCK10/RHOF/ARHGAP30/ZAP70/CDC42EP2/FGD4/RHOU/FMNL3/ARHGAP5/TFRC/IL…	64
R-HSA-264876	Insulin processing	9/1032	27/10899	0.00057397	0.0210973	0.0191215	RAB27A/EXOC8/SLC30A7/KIF5B/EXOC5/SLC30A6/EXOC6/ERO1B/ERO1A	9
R-HSA-199992	trans-Golgi Network Vesicle Budding	16/1032	72/10899	0.000939977	0.0336413	0.0304907	RAB5C/ACBD3/TPD52/BLOC1S1/VAMP7/BLOC1S6/AP4E1/SNAP23/CPD/AP3B1/CLINT1/PIK3C2A/PICALM/TBC1D8B/TPD52L1/TFRC	16
R-HSA-170834	Signaling by TGF-beta Receptor Complex	19/1032	93/10899	0.000980263	0.0341835	0.0309821	UBE2D1/CCNC/PPP1CB/CCNT2/TGFBR1/CCNT1/ITGAV/PPP1CC/TGFBR2/ITGB8/UCHL5/PPM1A/TRIM33/USP15/E2F5/SKIL/XPO1/SMURF2/STAT1	19
R-HSA-162658	Golgi Cisternae Pericentriolar Stack Reorganization	6/1032	14/10899	0.00109409	0.0369016	0.0334457	RAB2A/GORASP2/RAB1A/CDK1/BLZF1/CCNB1	6
R-HSA-68886	M Phase	59/1032	418/10899	0.00111248	0.0369016	0.0334457	PSMA2/MZT1/RAB2A/CHMP2B/PSMA1/RB1/UBE2D1/PPP2CA/BUB3/TAOK1/PSME4/TMPO/PPP1CC/GORASP2/NUP58/UBE2E1/TNPO1/RAB1A/SEH1L/CSNK2B/EML4/LBR/PSMD12/PDS5A/PPP2R5A/PLK4/NEK7/SMC4/ARPP19/PSMD5/NUP54/CDK1/SPDL1/CHMP3/LEMD3/CNEP1R1/BLZF1/STAG2/CDC27/PSMA3/TUBA4A/NEDD1/SPAST/H2AZ1/CENPU/PMF1/XPO1/MAD2L1/PRKAR2B/SKA2/MASTL/NDC1/ZWILCH/PSMB8/CDC20/HAUS3/CCNB1/NEK2/ZWINT	59
R-HSA-2465910	MASTL Facilitates Mitotic Progression	5/1032	10/10899	0.00126553	0.0409792	0.0371413	PPP2CA/ARPP19/CDK1/MASTL/CCNB1	5
R-HSA-8866652	Synthesis of active ubiquitin: roles of E1 and E2 enzymes	9/1032	30/10899	0.00135117	0.0427347	0.0387325	UBE2Q2/UBE2D1/UBE2K/UBE2W/UBE2G1/UBE2B/UBA6/UBE2E1/OTULIN	9
R-HSA-9705671	SARS-CoV-2 activates/modulates innate and adaptive immune responses	23/1032	126/10899	0.00155047	0.0479236	0.0434354	SEC24D/RIPK2/NUP58/SEC24A/B2M/CHUK/SEH1L/TAB2/SEC23A/SIKE1/NUP54/IFNAR1/TBK1/G3BP2/HLA-C/ATG14/HLA-G/NDC1/HLA-B/STAT1/TLR2/HLA-F/HLA-E	23

## Sheet: Exvivo GO BP Upregulated
ID	Description	GeneRatio	BgRatio	pvalue	p.adjust	qvalue	geneID	Count
GO:0044782	cilium organization	72/512	391/18903	3.19228e-39	1.13198e-35	1.1015e-35	BBS5/RABL2B/CEP164/CROCC/IFT140/CCDC40/KIF27/DNAH1/TRAF3IP1/HYDIN/DNAH2/IFT122/CCDC57/CEP89/CFAP46/ARMC9/CFAP74/CFAP157/IFT172/RFX2/CEP19/FOXJ1/CCDC13/FUZ/TTC21A/TMEM231/MKS1/DNAAF1/STK36/CFAP100/B9D2/DRC7/CFAP65/ODF2/DNAI1/GALNT11/DNAJB13/ODAD1/ODAD4/CCDC96/TTLL1/CPLANE2/IFT43/RSPH1/CFAP61/TEKT2/DYNLL1/DNAH5/RPGR/CFAP52/DNAAF10/MAPK15/ODAD3/CFAP73/DZIP1L/DNAI2/GAS8/KIF24/CCDC113/IQCG/CATIP/UNC11…	72
GO:0060271	cilium assembly	68/512	362/18903	1.28867e-37	2.2848e-34	2.22329e-34	BBS5/RABL2B/CEP164/CROCC/IFT140/CCDC40/KIF27/DNAH1/TRAF3IP1/HYDIN/DNAH2/IFT122/CCDC57/CEP89/CFAP46/ARMC9/CFAP74/CFAP157/IFT172/RFX2/CEP19/FOXJ1/CCDC13/FUZ/TMEM231/MKS1/DNAAF1/STK36/CFAP100/B9D2/DRC7/CFAP65/ODF2/DNAI1/GALNT11/DNAJB13/ODAD1/ODAD4/CCDC96/TTLL1/CPLANE2/IFT43/RSPH1/TEKT2/DYNLL1/DNAH5/RPGR/CFAP52/DNAAF10/MAPK15/ODAD3/CFAP73/DZIP1L/DNAI2/GAS8/KIF24/CCDC113/IQCG/UNC119B/IFT27/WDR19/SPAG1…	68
GO:0002181	cytoplasmic translation	41/512	161/18903	1.94083e-28	2.29406e-25	2.23229e-25	RPL7/RPL21/RPS27/RPS7/RPS3A/RPL18A/RPL6/RPS27A/RPL7A/RPS2/RPL10/RPSA/RPL23A/RPL41/RPL12/RPL13A/RPL14/YBX1/RPL10A/RPL29/EIF4B/RPS25/RPL24/RPL9/RPS15/RPS20/RPL4/RPS28/RPS26/RPS15A/RPL22/RPL27A/EIF3F/RPL23/RPLP1/RPS8/RPS23/RPL13/RPLP0/RPS18/RPL3	41
GO:0035082	axoneme assembly	32/512	93/18903	5.06793e-27	4.49272e-24	4.37176e-24	CCDC40/DNAH1/HYDIN/DNAH2/CFAP46/CFAP74/CFAP157/FOXJ1/DNAAF1/STK36/CFAP100/DRC7/CFAP65/DNAI1/DNAJB13/ODAD1/ODAD4/TTLL1/CPLANE2/RSPH1/TEKT2/DNAH5/DNAAF10/ODAD3/CFAP73/DNAI2/GAS8/IQCG/SPAG17/JHY/CFAP58/CFAP43	32
GO:0001578	microtubule bundle formation	35/512	124/18903	4.22503e-26	2.99639e-23	2.91571e-23	CCDC40/DNAH1/HYDIN/DNAH2/CFAP46/CFAP74/CFAP157/TPPP/FOXJ1/DNAAF1/STK36/CFAP100/DRC7/CFAP65/DNAI1/DNAJB13/ODAD1/ODAD4/TTLL1/CPLANE2/RSPH1/GAS2L1/TEKT2/DNAH5/TPPP3/DNAAF10/ODAD3/CFAP73/DNAI2/GAS8/IQCG/SPAG17/JHY/CFAP58/CFAP43	35
GO:0007018	microtubule-based movement	58/512	415/18903	3.91634e-25	2.31456e-22	2.25224e-22	RABL2B/IFT140/CCDC40/KIF27/NPHP4/DNAH1/TRAF3IP1/HYDIN/DNAH2/IFT122/KATNIP/UBB/CFAP46/DNAH10/CFAP157/IFT172/DNAH3/DNAH9/MAP1A/FUZ/TTC21A/DNAL4/DNAAF1/STK36/CFAP100/DRC7/CFAP65/DNAI1/CFAP45/ODAD1/ODAD4/AP3M2/DNAH11/TTLL1/TCTE1/IFT43/CFAP61/TEKT2/DYNLL1/DNAH5/RPGR/CFAP52/ODAD3/CFAP73/DNAI2/GAS8/KIF24/PLTP/IQCG/IFT27/WDR19/SPAG17/DYNC2I1/JHY/CFAP58/TUB/CFAP43/DNHD1	58
GO:0003341	cilium movement	37/512	195/18903	5.5866e-21	2.83001e-18	2.75382e-18	CCDC40/KIF27/NPHP4/DNAH1/HYDIN/KATNIP/CFAP46/CFAP157/DNAH9/TTC21A/DNAAF1/STK36/CFAP100/DRC7/CFAP65/DNAI1/CFAP45/ODAD1/ODAD4/DNAH11/TTLL1/TCTE1/CFAP61/TEKT2/DNAH5/CFAP52/ODAD3/CFAP73/DNAI2/GAS8/PLTP/IQCG/SPAG17/JHY/CFAP58/CFAP43/DNHD1	37
GO:0099111	microtubule-based transport	35/512	209/18903	4.34298e-18	1.92503e-15	1.8732e-15	RABL2B/IFT140/CCDC40/KIF27/DNAH1/TRAF3IP1/IFT122/KATNIP/UBB/IFT172/DNAH9/MAP1A/FUZ/TTC21A/DNAAF1/STK36/DNAI1/CFAP45/ODAD4/AP3M2/DNAH11/TTLL1/IFT43/DYNLL1/DNAH5/RPGR/ODAD3/GAS8/IFT27/WDR19/SPAG17/DYNC2I1/JHY/TUB/CFAP43	35
GO:0003351	epithelial cilium movement involved in extracellular fluid movement	18/512	42/18903	8.8855e-18	3.50089e-15	3.40663e-15	CCDC40/KIF27/DNAH1/KATNIP/DNAH9/DNAAF1/STK36/DNAI1/CFAP45/ODAD4/DNAH11/TTLL1/DNAH5/ODAD3/GAS8/SPAG17/JHY/CFAP43	18
GO:0006858	extracellular transport	18/512	45/18903	3.99818e-17	1.41776e-14	1.37958e-14	CCDC40/KIF27/DNAH1/KATNIP/DNAH9/DNAAF1/STK36/DNAI1/CFAP45/ODAD4/DNAH11/TTLL1/DNAH5/ODAD3/GAS8/SPAG17/JHY/CFAP43	18
GO:0070286	axonemal dynein complex assembly	14/512	39/18903	7.77683e-13	2.50697e-10	2.43947e-10	CCDC40/DNAH1/DNAH2/DNAAF1/CFAP100/DNAI1/ODAD1/ODAD4/TEKT2/DNAH5/DNAAF10/ODAD3/CFAP73/DNAI2	14
GO:0044458	motile cilium assembly	16/512	61/18903	4.387e-12	1.29636e-09	1.26146e-09	BBS5/CCDC40/DNAH1/CFAP157/FOXJ1/MKS1/DNAAF1/DRC7/CFAP65/TTLL1/DYNLL1/IQCG/SPAG17/JHY/CFAP58/CFAP43	16
GO:0001539	cilium or flagellum-dependent cell motility	24/512	159/18903	8.4576e-12	2.14219e-09	2.08451e-09	CCDC40/NPHP4/DNAH1/DNAH2/CFAP46/CFAP157/DNAH3/TTC21A/DRC7/CFAP65/DNAI1/CFAP45/DNAH11/TTLL1/TCTE1/TEKT2/DNAH5/CFAP52/ODAD3/GAS8/PLTP/IQCG/CFAP58/CFAP43	24
GO:0060285	cilium-dependent cell motility	24/512	159/18903	8.4576e-12	2.14219e-09	2.08451e-09	CCDC40/NPHP4/DNAH1/DNAH2/CFAP46/CFAP157/DNAH3/TTC21A/DRC7/CFAP65/DNAI1/CFAP45/DNAH11/TTLL1/TCTE1/TEKT2/DNAH5/CFAP52/ODAD3/GAS8/PLTP/IQCG/CFAP58/CFAP43	24
GO:0042073	intraciliary transport	14/512	47/18903	1.44362e-11	3.41271e-09	3.32083e-09	RABL2B/IFT140/TRAF3IP1/IFT122/IFT172/FUZ/TTC21A/IFT43/DYNLL1/RPGR/IFT27/WDR19/DYNC2I1/TUB	14
GO:0061512	protein localization to cilium	16/512	70/18903	4.28503e-11	9.1134e-09	8.86803e-09	CROCC/IFT140/TULP3/NPHP4/IFT122/TTC21A/INPP5E/CDK20/ODAD4/DNAH11/MAPK15/DZIP1L/GAS8/WDR19/CFAP58/TUB	16
GO:0030317	flagellated sperm motility	21/512	130/18903	4.62609e-11	9.1134e-09	8.86803e-09	CCDC40/NPHP4/DNAH1/CFAP157/TTC21A/DRC7/CFAP65/DNAI1/CFAP45/DNAH11/TTLL1/TCTE1/TEKT2/DNAH5/CFAP52/ODAD3/GAS8/PLTP/IQCG/CFAP58/CFAP43	21
GO:0097722	sperm motility	21/512	130/18903	4.62609e-11	9.1134e-09	8.86803e-09	CCDC40/NPHP4/DNAH1/CFAP157/TTC21A/DRC7/CFAP65/DNAI1/CFAP45/DNAH11/TTLL1/TCTE1/TEKT2/DNAH5/CFAP52/ODAD3/GAS8/PLTP/IQCG/CFAP58/CFAP43	21
GO:0060294	cilium movement involved in cell motility	22/512	146/18903	6.52712e-11	1.21817e-08	1.18537e-08	CCDC40/NPHP4/DNAH1/CFAP46/CFAP157/TTC21A/DRC7/CFAP65/DNAI1/CFAP45/DNAH11/TTLL1/TCTE1/TEKT2/DNAH5/CFAP52/ODAD3/GAS8/PLTP/IQCG/CFAP58/CFAP43	22
GO:0035721	intraciliary retrograde transport	7/512	14/18903	2.98851e-08	5.29862e-06	5.15596e-06	IFT140/IFT122/TTC21A/IFT43/DYNLL1/WDR19/DYNC2I1	7
GO:0090660	cerebrospinal fluid circulation	7/512	15/18903	5.47272e-08	9.24109e-06	8.99228e-06	KATNIP/DNAH9/CFAP45/ODAD4/ODAD3/JHY/CFAP43	7
GO:0007389	pattern specification process	35/512	472/18903	8.02211e-08	1.29302e-05	1.2582e-05	SSBP3/PBX2/BBS5/IFT140/TULP3/CCDC40/BASP1/DMRT2/IFT172/FOXJ1/FUZ/WLS/MKS1/CXXC4/DNAAF1/CDK20/IRX3/DNAI1/CFAP45/GALNT11/ODAD4/SYNGAP1/DNAH11/CPLANE2/SHROOM3/CDON/DNAH5/CFAP52/PCSK5/ODAD3/DZIP1L/DNAI2/GAS8/WDR19/DMRT3	35
GO:0007368	determination of left/right symmetry	17/512	131/18903	9.46624e-08	1.45945e-05	1.42015e-05	BBS5/IFT140/CCDC40/IFT172/FOXJ1/MKS1/DNAAF1/DNAI1/CFAP45/GALNT11/ODAD4/DNAH11/DNAH5/CFAP52/ODAD3/DNAI2/GAS8	17
GO:0036159	inner dynein arm assembly	7/512	17/18903	1.57775e-07	2.33112e-05	2.26836e-05	CCDC40/DNAH1/DNAH2/DNAAF1/CFAP100/TEKT2/CFAP73	7
GO:0009855	determination of bilateral symmetry	17/512	141/18903	2.79135e-07	3.95925e-05	3.85265e-05	BBS5/IFT140/CCDC40/IFT172/FOXJ1/MKS1/DNAAF1/DNAI1/CFAP45/GALNT11/ODAD4/DNAH11/DNAH5/CFAP52/ODAD3/DNAI2/GAS8	17
GO:0009799	specification of symmetry	17/512	142/18903	3.0929e-07	4.21824e-05	4.10467e-05	BBS5/IFT140/CCDC40/IFT172/FOXJ1/MKS1/DNAAF1/DNAI1/CFAP45/GALNT11/ODAD4/DNAH11/DNAH5/CFAP52/ODAD3/DNAI2/GAS8	17
GO:0007224	smoothened signaling pathway	17/512	144/18903	3.7865e-07	4.97294e-05	4.83905e-05	IFT140/TULP3/IFT122/ARMC9/IFT172/HHAT/FUZ/TMEM231/MKS1/STK36/CDK20/CPLANE2/CDON/DZIP1L/GAS8/IFT27/WDR19	17
GO:0007288	sperm axoneme assembly	8/512	28/18903	5.28799e-07	6.69687e-05	6.51656e-05	DNAH1/CFAP157/DRC7/CFAP65/TTLL1/IQCG/CFAP58/CFAP43	8
GO:0060287	epithelial cilium movement involved in determination of left/right asymmetry	6/512	13/18903	5.59805e-07	6.84506e-05	6.66076e-05	CCDC40/DNAAF1/CFAP45/ODAD4/DNAH11/ODAD3	6
GO:0010970	transport along microtubule	18/512	168/18903	7.40912e-07	8.75758e-05	8.52179e-05	RABL2B/IFT140/TRAF3IP1/IFT122/UBB/IFT172/MAP1A/FUZ/TTC21A/AP3M2/IFT43/DYNLL1/RPGR/IFT27/WDR19/SPAG17/DYNC2I1/TUB	18
GO:0036158	outer dynein arm assembly	7/512	23/18903	1.72669e-06	0.000191353	0.000186201	DNAAF1/DNAI1/ODAD1/ODAD4/DNAH5/ODAD3/DNAI2	7
GO:0031503	protein-containing complex localization	18/512	178/18903	1.72682e-06	0.000191353	0.000186201	NPM1/RPS15/RABL2B/IFT140/TRAF3IP1/IFT122/IFT172/FUZ/TTC21A/IFT43/ARHGAP44/DYNLL1/RPGR/IFT27/WDR19/SPAG17/DYNC2I1/TUB	18
GO:0042773	ATP synthesis coupled electron transport	13/512	101/18903	3.36627e-06	0.000351082	0.00034163	ND6/SDHC/ND3/CYTB/COX2/COX1/CHCHD2/ND1/ND5/ND4/ND2/COX3/ND4L	13
GO:0042775	mitochondrial ATP synthesis coupled electron transport	13/512	101/18903	3.36627e-06	0.000351082	0.00034163	ND6/SDHC/ND3/CYTB/COX2/COX1/CHCHD2/ND1/ND5/ND4/ND2/COX3/ND4L	13
GO:0030705	cytoskeleton-dependent intracellular transport	19/512	208/18903	4.09772e-06	0.000415157	0.000403979	RABL2B/IFT140/TUBA1A/TRAF3IP1/IFT122/UBB/IFT172/MAP1A/FUZ/TTC21A/AP3M2/IFT43/DYNLL1/RPGR/IFT27/WDR19/SPAG17/DYNC2I1/TUB	19
GO:0120316	sperm flagellum assembly	8/512	36/18903	4.25438e-06	0.000419057	0.000407774	DNAH1/CFAP157/DRC7/CFAP65/TTLL1/IQCG/CFAP58/CFAP43	8
GO:0042255	ribosome assembly	10/512	61/18903	5.08014e-06	0.000485224	0.00047216	RPS27/RPL6/RPL10/RPSA/RPL23A/NPM1/RPL24/RPS15/RPS28/RPLP0	10
GO:0072522	purine-containing compound biosynthetic process	21/512	251/18903	5.19981e-06	0.000485224	0.00047216	ND6/TECR/ATP6/TMSB4X/SDHC/ND3/DCAKD/COX2/ND1/ATP8/ND5/ND4/ACACB/ND2/NCS1/ADA2/ADCY9/ND4L/AK9/ACSBG1/ADSS1	21
GO:0006754	ATP biosynthetic process	13/512	106/18903	5.80407e-06	0.000527724	0.000513515	ND6/ATP6/TMSB4X/SDHC/ND3/COX2/ND1/ATP8/ND5/ND4/ND2/ND4L/AK9	13
GO:0042273	ribosomal large subunit biogenesis	11/512	76/18903	6.03646e-06	0.000535132	0.000520724	RPL7/RPL6/RPL7A/RPL10/RPL23A/NPM1/RPL14/RPL10A/RPL24/RPL7L1/RPLP0	11
GO:0019646	aerobic electron transport chain	12/512	93/18903	7.7906e-06	0.000673792	0.000655651	ND6/SDHC/ND3/CYTB/COX2/COX1/ND1/ND5/ND4/ND2/COX3/ND4L	12
GO:0021532	neural tube patterning	8/512	39/18903	8.05367e-06	0.00067996	0.000661652	SSBP3/IFT140/TULP3/MKS1/CDK20/CPLANE2/DZIP1L/WDR19	8
GO:0009152	purine ribonucleotide biosynthetic process	19/512	220/18903	9.24665e-06	0.000762526	0.000741996	ND6/TECR/ATP6/TMSB4X/SDHC/ND3/DCAKD/COX2/ND1/ATP8/ND5/ND4/ACACB/ND2/ADCY9/ND4L/AK9/ACSBG1/ADSS1	19
GO:0021915	neural tube development	16/512	164/18903	1.02298e-05	0.000821556	0.000799436	RPS7/SSBP3/CELSR1/IFT140/TULP3/PKD1/PHGDH/IFT122/IFT172/FUZ/MKS1/CDK20/CPLANE2/SHROOM3/DZIP1L/WDR19	16
GO:0006164	purine nucleotide biosynthetic process	20/512	242/18903	1.04258e-05	0.000821556	0.000799436	ND6/TECR/ATP6/TMSB4X/SDHC/ND3/DCAKD/COX2/ND1/ATP8/ND5/ND4/ACACB/ND2/NCS1/ADCY9/ND4L/AK9/ACSBG1/ADSS1	20
GO:0006119	oxidative phosphorylation	15/512	147/18903	1.12205e-05	0.000864957	0.000841669	ND6/ATP6/SDHC/ND3/CYTB/COX2/COX1/CHCHD2/ND1/ATP8/ND5/ND4/ND2/COX3/ND4L	15
GO:0042776	proton motive force-driven mitochondrial ATP synthesis	10/512	67/18903	1.20816e-05	0.000911518	0.000886976	ND6/ATP6/SDHC/ND3/ND1/ATP8/ND5/ND4/ND2/ND4L	10
GO:0060831	smoothened signaling pathway involved in dorsal/ventral neural tube patterning	5/512	13/18903	1.53678e-05	0.00113529	0.00110473	TULP3/MKS1/CDK20/CPLANE2/WDR19	5
GO:0008589	regulation of smoothened signaling pathway	11/512	84/18903	1.61112e-05	0.00116592	0.00113453	IFT140/TULP3/IFT122/ARMC9/IFT172/FUZ/MKS1/STK36/CDK20/CPLANE2/GAS8	11
GO:0009142	nucleoside triphosphate biosynthetic process	14/512	134/18903	1.67461e-05	0.00118763	0.00115566	ND6/ATP6/TMSB4X/SDHC/ND3/COX2/ND1/ATP8/ND5/ND4/ND2/AK8/ND4L/AK9	14
GO:0009206	purine ribonucleoside triphosphate biosynthetic process	13/512	117/18903	1.7228e-05	0.00119785	0.0011656	ND6/ATP6/TMSB4X/SDHC/ND3/COX2/ND1/ATP8/ND5/ND4/ND2/ND4L/AK9	13
GO:0009145	purine nucleoside triphosphate biosynthetic process	13/512	118/18903	1.88912e-05	0.00128824	0.00125355	ND6/ATP6/TMSB4X/SDHC/ND3/COX2/ND1/ATP8/ND5/ND4/ND2/ND4L/AK9	13
GO:0009260	ribonucleotide biosynthetic process	19/512	234/18903	2.21206e-05	0.00147999	0.00144015	ND6/TECR/ATP6/TMSB4X/SDHC/ND3/DCAKD/COX2/ND1/ATP8/ND5/ND4/ACACB/ND2/ADCY9/ND4L/AK9/ACSBG1/ADSS1	19
GO:0022904	respiratory electron transport chain	13/512	122/18903	2.70356e-05	0.00177533	0.00172753	ND6/SDHC/ND3/CYTB/COX2/COX1/CHCHD2/ND1/ND5/ND4/ND2/COX3/ND4L	13
GO:0009201	ribonucleoside triphosphate biosynthetic process	13/512	123/18903	2.94976e-05	0.00190179	0.00185059	ND6/ATP6/TMSB4X/SDHC/ND3/COX2/ND1/ATP8/ND5/ND4/ND2/ND4L/AK9	13
GO:0009165	nucleotide biosynthetic process	22/512	304/18903	3.06786e-05	0.00194261	0.00189031	ND6/TECR/ATP6/TMSB4X/SDHC/ND3/DCAKD/COX2/ND1/ATP8/ND5/ND4/ACACB/ND2/NCS1/AK8/ADCY9/ND4L/AFMID/AK9/ACSBG1/ADSS1	22
GO:0046390	ribose phosphate biosynthetic process	19/512	241/18903	3.32647e-05	0.00206941	0.00201369	ND6/TECR/ATP6/TMSB4X/SDHC/ND3/DCAKD/COX2/ND1/ATP8/ND5/ND4/ACACB/ND2/ADCY9/ND4L/AK9/ACSBG1/ADSS1	19
GO:1901293	nucleoside phosphate biosynthetic process	22/512	306/18903	3.38865e-05	0.00207175	0.00201597	ND6/TECR/ATP6/TMSB4X/SDHC/ND3/DCAKD/COX2/ND1/ATP8/ND5/ND4/ACACB/ND2/NCS1/AK8/ADCY9/ND4L/AFMID/AK9/ACSBG1/ADSS1	22
GO:0015986	proton motive force-driven ATP synthesis	10/512	76/18903	3.74089e-05	0.00224834	0.0021878	ND6/ATP6/SDHC/ND3/ND1/ATP8/ND5/ND4/ND2/ND4L	10
GO:0003356	regulation of cilium beat frequency	5/512	17/18903	6.75365e-05	0.00399141	0.00388394	CCDC40/DNAAF1/CFAP45/DNAH11/CFAP43	5
GO:0022900	electron transport chain	15/512	176/18903	9.25204e-05	0.00537832	0.00523351	ND6/SDHC/ND3/CYTB/COX2/COX1/CHCHD2/ND1/ND5/ND4/PHGDH/ND2/COX3/ND4L/WDR93	15
GO:1901620	regulation of smoothened signaling pathway involved in dorsal/ventral neural tube patterning	4/512	10/18903	9.81056e-05	0.005611	0.00545993	TULP3/MKS1/CDK20/CPLANE2	4
GO:2000781	positive regulation of double-strand break repair	10/512	88/18903	0.000132439	0.0074544	0.0072537	MORF4L1/BRD7/EP400/MRNIP/ZCWPW1/SPIRE2/DDX11/RUVBL1/BCL7A/KMT5C	10
GO:1904667	negative regulation of ubiquitin protein ligase activity	4/512	12/18903	0.000221466	0.0122706	0.0119402	RPS7/RPS15/RPS20/RPL23	4
GO:0051258	protein polymerization	19/512	281/18903	0.000252877	0.0137954	0.013424	VDAC2/IQANK1/WASHC2C/TMSB4X/KRT5/CCDC57/TPPP/BAIAP2L1/MAPRE3/SPIRE2/TUBG2/EML2/FAM107A/SLIT2/GAS7/CRACD/TPPP3/CATIP/DMTN	19
GO:0009060	aerobic respiration	15/512	194/18903	0.000271234	0.0145727	0.0141803	ND6/ATP6/SDHC/ND3/CYTB/COX2/COX1/CHCHD2/ND1/ATP8/ND5/ND4/ND2/COX3/ND4L	15
GO:0046034	ATP metabolic process	16/512	217/18903	0.000294007	0.0155604	0.0151415	ND6/ATP6/PGAM1/TMSB4X/SDHC/ND3/COX2/ND1/ATP8/ND5/ND4/ND2/ND4L/AK9/ATP6V1B1/ABCC6	16
GO:0045333	cellular respiration	17/512	240/18903	0.000308293	0.0160766	0.0156437	ND6/ATP6/PRELID1/SDHC/ND3/CYTB/COX2/COX1/CHCHD2/ND1/ATP8/ND5/ND4/ND2/COX3/ND4L/SDHAF4	17
GO:0021904	dorsal/ventral neural tube patterning	5/512	23/18903	0.000321061	0.0164437	0.016001	TULP3/MKS1/CDK20/CPLANE2/WDR19	5
GO:0042254	ribosome biogenesis	20/512	310/18903	0.000324609	0.0164437	0.016001	RPL7/RPS27/RPS7/RPL6/RPL7A/RPL10/RPSA/RPL23A/NPM1/RPL14/RPL10A/RPS25/RPL24/RPS15/RPS28/RPL7L1/RPS8/RPLP0/GNL3L/PIN4	20
GO:0006120	mitochondrial electron transport, NADH to ubiquinone	7/512	51/18903	0.000423385	0.0211454	0.0205761	ND6/ND3/ND1/ND5/ND4/ND2/ND4L	7
GO:0032886	regulation of microtubule-based process	17/512	252/18903	0.000540282	0.0266089	0.0258925	NPM1/CCDC40/PKD1/TRAF3IP1/TPPP/MAPRE3/MAP1A/DNAAF1/EML2/CFAP45/FAM107A/STMND1/DNAH11/GAS2L1/MAPK15/MPDZ/CFAP43	17
GO:0000027	ribosomal large subunit assembly	5/512	26/18903	0.000586962	0.0285119	0.0277442	RPL6/RPL10/RPL23A/RPL24/RPLP0	5
GO:0007286	spermatid development	14/512	189/18903	0.000659422	0.0315988	0.030748	DNAH1/CFAP157/H3-3A/RFX2/TTC21A/DRC7/CFAP65/ODF2/TTLL1/RSPH1/IQCG/SPAG17/CFAP58/CFAP43	14
GO:0045739	positive regulation of DNA repair	11/512	128/18903	0.000726621	0.0343546	0.0334296	MORF4L1/BRD7/EP400/HMGB1/MRNIP/ZCWPW1/SPIRE2/DDX11/RUVBL1/BCL7A/KMT5C	11
GO:1990403	embryonic brain development	4/512	16/18903	0.000747022	0.0348545	0.0339161	RPL10/IFT140/MKS1/CDK20	4
GO:0001843	neural tube closure	9/512	92/18903	0.000866496	0.0395407	0.0384761	RPS7/CELSR1/TULP3/IFT122/IFT172/FUZ/MKS1/CDK20/SHROOM3	9
GO:0003002	regionalization	21/512	360/18903	0.000869762	0.0395407	0.0384761	SSBP3/PBX2/IFT140/TULP3/BASP1/DMRT2/IFT172/FOXJ1/FUZ/WLS/MKS1/CXXC4/DNAAF1/CDK20/IRX3/CPLANE2/CDON/PCSK5/DZIP1L/WDR19/DMRT3	21
GO:0022613	ribonucleoprotein complex biogenesis	26/512	489/18903	0.000892409	0.0400567	0.0389782	RPL7/RPS27/RPS7/RPL6/RPL7A/RPL10/RPSA/RPL23A/NPM1/RPL13A/RPL14/RPL10A/EIF4B/RPS25/RPL24/RPS15/RPS28/EIF3F/RPL7L1/RPS8/RPLP0/SNRPG/HSP90AB1/GNL3L/PIN4/RUVBL1	26
GO:0060606	tube closure	9/512	93/18903	0.000936816	0.0412105	0.040101	RPS7/CELSR1/TULP3/IFT122/IFT172/FUZ/MKS1/CDK20/SHROOM3	9
GO:0048515	spermatid differentiation	14/512	196/18903	0.000941357	0.0412105	0.040101	DNAH1/CFAP157/H3-3A/RFX2/TTC21A/DRC7/CFAP65/ODF2/TTLL1/RSPH1/IQCG/SPAG17/CFAP58/CFAP43	14
GO:0009205	purine ribonucleoside triphosphate metabolic process	16/512	242/18903	0.00096493	0.0417274	0.0406039	ND6/ATP6/PGAM1/TMSB4X/SDHC/ND3/COX2/ND1/ATP8/ND5/ND4/ND2/ND4L/AK9/ATP6V1B1/ABCC6	16
GO:0009141	nucleoside triphosphate metabolic process	17/512	267/18903	0.00102908	0.0439651	0.0427814	ND6/ATP6/PGAM1/TMSB4X/SDHC/ND3/COX2/ND1/ATP8/ND5/ND4/ND2/AK8/ND4L/AK9/ATP6V1B1/ABCC6	17
GO:1901798	positive regulation of signal transduction by p53 class mediator	5/512	30/18903	0.00116318	0.0491027	0.0477806	RPS7/RPS15/RPS20/RPL23/UBB	5
GO:0009144	purine nucleoside triphosphate metabolic process	16/512	247/18903	0.00119603	0.049752	0.0484125	ND6/ATP6/PGAM1/TMSB4X/SDHC/ND3/COX2/ND1/ATP8/ND5/ND4/ND2/ND4L/AK9/ATP6V1B1/ABCC6	16
GO:0009150	purine ribonucleotide metabolic process	24/512	447/18903	0.00121765	0.049752	0.0484125	ND6/TECR/ATP6/PGAM1/TMSB4X/SDHC/ND3/DCAKD/COX2/ND1/ATP8/ND5/ND4/ACACB/NUDT4/ND2/ADCY9/SULT2B1/ND4L/AK9/ATP6V1B1/ACSBG1/ABCC6/ADSS1	24
GO:0042274	ribosomal small subunit biogenesis	8/512	78/18903	0.00122065	0.049752	0.0484125	RPS27/RPS7/RPSA/NPM1/RPS25/RPS15/RPS28/RPS8	8

## Sheet: Exvivo GO BP Downregulated
ID	Description	GeneRatio	BgRatio	pvalue	p.adjust	qvalue	geneID	Count
GO:0048193	Golgi vesicle transport	70/1558	298/18903	5.25419e-16	2.99542e-12	2.60442e-12	IER3IP1/KDELR2/ARF4/GOLT1B/TMED7/TMED3/VAMP3/TMED5/SCAMP1/RAB33B/AP1AR/SEC24D/ARL1/EXOC8/BET1/RAB8B/NAPG/SLC10A7/EHD3/RAB10/LYPLA1/TRAPPC13/RNF139/YKT6/GOLGA7/VPS13C/COG3/ARFGEF2/PPP6C/RAB14/SEC24A/EPS15/TFG/VAMP7/RAB1A/TMED2/ERGIC2/GOLGA5/ARFGAP3/GOSR2/SAR1A/CNIH4/COG5/TRAPPC6B/NSF/BCAP29/MON2/DOP1A/EXOC5/RINT1/LMAN1/YIPF5/COPB1/ACSL3/SEC23A/CUL3/SNAP23/EXOC6/VPS13A/VPS54/BLZF1/PITPNB/SPAST/ATP2…	70
GO:0019882	antigen processing and presentation	34/1558	108/18903	3.23425e-12	9.21923e-09	8.01584e-09	RAB27A/ATG5/RAB8B/RAB10/ARL8B/B2M/PIKFYVE/HLA-C/AP3B1/HLA-DQA1/LNPEP/HLA-DMA/IDE/HLA-DMB/HLA-G/HLA-DRB5/TAP2/HLA-DRA/HLA-B/HLA-DPA1/TAPBPL/HLA-DQB1/PSMB8/RFTN1/ERAP2/TAP1/CD8A/CD74/HLA-F/HLA-E/HLA-DRB1/HLA-DOA/AZGP1/HLA-DPB1	34
GO:0048002	antigen processing and presentation of peptide antigen	25/1558	64/18903	1.12781e-11	2.14321e-08	1.86346e-08	B2M/PIKFYVE/HLA-C/HLA-DQA1/LNPEP/HLA-DMA/IDE/HLA-DMB/HLA-G/HLA-DRB5/TAP2/HLA-DRA/HLA-B/HLA-DPA1/TAPBPL/HLA-DQB1/ERAP2/TAP1/CD74/HLA-F/HLA-E/HLA-DRB1/HLA-DOA/AZGP1/HLA-DPB1	25
GO:1903037	regulation of leukocyte cell-cell adhesion	71/1558	377/18903	3.14391e-11	4.48086e-08	3.89597e-08	ZDHHC21/BMI1/RASGRP1/KITLG/IL15/CD274/TWSG1/RIPK2/CYRIB/PAWR/CBFB/CASP3/TGFBR2/SLC7A1/CD47/B2M/MARCHF7/PAG1/DLG1/ST3GAL4/NDFIP1/RC3H2/SMARCE1/NCK1/MALT1/ZBTB1/PIK3CA/AP3B1/HLA-DQA1/JAK2/CHST2/IL6ST/LYN/YES1/HLA-DMA/PTPN22/XBP1/HLA-DMB/HLA-G/BCL10/CD55/HLA-DRB5/ITGA4/HLA-DRA/PPP3CA/LCK/IDO1/HLA-DPA1/IRF1/NFAT5/ETS1/HLA-DQB1/GPNMB/ZAP70/SOCS5/SASH3/TMEM131L/CORO1A/ARID2/VSIR/TFRC/CD74/CD3E/HLA-E/HL…	71
GO:1903039	positive regulation of leukocyte cell-cell adhesion	57/1558	275/18903	6.12717e-11	6.9862e-08	6.07428e-08	BMI1/RASGRP1/KITLG/IL15/CD274/RIPK2/CYRIB/CBFB/TGFBR2/SLC7A1/CD47/B2M/ST3GAL4/SMARCE1/NCK1/MALT1/ZBTB1/PIK3CA/AP3B1/HLA-DQA1/JAK2/CHST2/IL6ST/LYN/YES1/HLA-DMA/PTPN22/XBP1/HLA-DMB/HLA-G/BCL10/CD55/HLA-DRB5/ITGA4/HLA-DRA/PPP3CA/LCK/HLA-DPA1/NFAT5/ETS1/HLA-DQB1/ZAP70/SOCS5/SASH3/CORO1A/ARID2/VSIR/TFRC/CD74/CD3E/HLA-E/HLA-DRB1/IL2RG/RUNX3/HLA-DOA/CD6/HLA-DPB1	57
GO:0002483	antigen processing and presentation of endogenous peptide antigen	13/1558	19/18903	1.30717e-10	1.18673e-07	1.03182e-07	B2M/HLA-C/IDE/HLA-G/TAP2/HLA-DRA/HLA-B/ERAP2/TAP1/HLA-F/HLA-E/HLA-DRB1/AZGP1	13
GO:0007159	leukocyte cell-cell adhesion	74/1558	414/18903	1.52427e-10	1.18673e-07	1.03182e-07	ZDHHC21/BMI1/RASGRP1/SLC39A8/KITLG/IL15/CD274/TWSG1/RIPK2/CYRIB/PAWR/CBFB/CASP3/TGFBR2/SLC7A1/CD47/B2M/MARCHF7/PAG1/DLG1/ST3GAL4/NDFIP1/RC3H2/SMARCE1/NCK1/MALT1/ZBTB1/PIK3CA/AP3B1/HLA-DQA1/JAK2/CHST2/IL6ST/LYN/YES1/HLA-DMA/PTPN22/XBP1/HLA-DMB/HLA-G/BCL10/CD55/HLA-DRB5/ITGA4/HLA-DRA/PPP3CA/LCK/IDO1/HLA-DPA1/IRF1/ITGB7/NFAT5/ETS1/HLA-DQB1/GPNMB/ZAP70/SEMA4D/SOCS5/SASH3/TMEM131L/CORO1A/ARID2/VSIR/TF…	74
GO:0019883	antigen processing and presentation of endogenous antigen	15/1558	26/18903	1.66529e-10	1.18673e-07	1.03182e-07	ATG5/B2M/HLA-C/IDE/HLA-G/TAP2/HLA-DRA/HLA-B/ERAP2/TAP1/CD74/HLA-F/HLA-E/HLA-DRB1/AZGP1	15
GO:0050863	regulation of T cell activation	69/1558	376/18903	1.96066e-10	1.24197e-07	1.07985e-07	BMI1/RASGRP1/KITLG/IL15/CD274/TWSG1/RIPK2/CYRIB/PAWR/CBFB/CASP3/TGFBR2/SLC7A1/CD47/B2M/MARCHF7/PAG1/DLG1/NDFIP1/RC3H2/SMARCE1/SOS2/NCK1/MALT1/ZBTB1/PIK3CA/AP3B1/HLA-DQA1/JAK2/IL6ST/LYN/YES1/HLA-DMA/PTPN22/XBP1/BID/HLA-DMB/HLA-G/BCL10/CD55/HLA-DRB5/CD2/HLA-DRA/PPP3CA/LCK/IDO1/HLA-DPA1/IRF1/HLA-DQB1/PRDM1/GPNMB/ZAP70/SOCS5/SASH3/TMEM131L/CORO1A/ARID2/VSIR/TFRC/CD74/CD3E/BATF/HLA-E/HLA-DRB1/IL2RG/RU…	69
GO:0050870	positive regulation of T cell activation	52/1558	251/18903	4.29734e-10	2.44991e-07	2.13012e-07	BMI1/RASGRP1/KITLG/IL15/CD274/RIPK2/CYRIB/CBFB/TGFBR2/SLC7A1/CD47/B2M/SMARCE1/NCK1/MALT1/ZBTB1/PIK3CA/AP3B1/HLA-DQA1/JAK2/IL6ST/LYN/YES1/HLA-DMA/PTPN22/XBP1/HLA-DMB/HLA-G/BCL10/CD55/HLA-DRB5/HLA-DRA/PPP3CA/LCK/HLA-DPA1/HLA-DQB1/ZAP70/SOCS5/SASH3/CORO1A/ARID2/VSIR/TFRC/CD74/CD3E/HLA-E/HLA-DRB1/IL2RG/RUNX3/HLA-DOA/CD6/HLA-DPB1	52
GO:0002478	antigen processing and presentation of exogenous peptide antigen	18/1558	40/18903	5.46196e-10	2.83079e-07	2.46128e-07	B2M/PIKFYVE/HLA-DQA1/LNPEP/HLA-DMA/HLA-DMB/HLA-DRB5/TAP2/HLA-DRA/HLA-DPA1/HLA-DQB1/TAP1/CD74/HLA-F/HLA-E/HLA-DRB1/HLA-DOA/HLA-DPB1	18
GO:0022409	positive regulation of cell-cell adhesion	61/1558	322/18903	6.0704e-10	2.88395e-07	2.5075e-07	BMI1/RASGRP1/KITLG/IL15/CD274/RIPK2/CYRIB/CBFB/TGFBR2/SLC7A1/CD47/B2M/ST3GAL4/DENND6A/SMARCE1/NCK1/MALT1/ZBTB1/PIK3CA/AP3B1/HLA-DQA1/JAK2/CHST2/IL6ST/LYN/YES1/HLA-DMA/PTPN22/XBP1/HLA-DMB/HLA-G/BCL10/CD55/FUT3/HLA-DRB5/ITGA4/HLA-DRA/PPP3CA/LCK/HLA-DPA1/NFAT5/ETS1/HLA-DQB1/ZAP70/SOCS5/SASH3/CORO1A/ARID2/CEACAM6/VSIR/TFRC/CD74/CD3E/HLA-E/HLA-DRB1/IL2RG/RUNX3/HLA-DOA/CD6/WNT5A/HLA-DPB1	61
GO:0043161	proteasome-mediated ubiquitin-dependent protein catabolic process	76/1558	450/18903	1.27789e-09	5.60402e-07	4.87252e-07	PSMA2/RBX1/ZNRF2/UBQLN1/PSMA1/FEM1C/UBE2J1/FEM1B/RNF217/UBE2K/SPOPL/RCHY1/DNAJB14/UBE2W/DERL1/CLOCK/UBE2G1/UBE2B/ANKIB1/FBXL17/SIRT1/WAC/STT3B/UBXN4/YOD1/TBL1XR1/LTN1/STYX/DNAJB9/BIRC2/UCHL5/FBXW7/FBXO33/FBXL3/CUL5/WDR26/RNF19A/CRBN/MAN1A1/RNF103/PSMD12/SH3BGRL/UBR3/PLAA/CD2AP/CUL3/SOCS4/SEL1L/PCNP/ANAPC13/NHLRC3/USP14/WWP1/CDC27/EDEM3/HERPUD1/APPBP2/UBE4A/PSMA3/FBXO45/KLHL15/XPO1/SMURF2/ASCC3/FB…	76
GO:0016197	endosomal transport	50/1558	247/18903	2.13016e-09	8.11815e-07	7.05847e-07	DENND1B/GOLT1B/CHMP2B/VAMP3/ARL1/RAB8B/VAMP4/VPS26A/TMEM87B/EHD3/RAB10/RAB11A/AP5M1/BLOC1S1/RAB9A/YKT6/SNX4/ARL8B/TMEM87A/RAB14/BLOC1S2/LEPROTL1/EPS15/VPS29/VPS37A/ARL4C/RIC1/ACAP2/PIKFYVE/TBC1D23/VPS26C/INPP5F/VTA1/CHMP1B/BLTP1/SNX18/EEA1/ARFIP1/WASHC4/SNX6/CHMP3/VPS37B/LAPTM4B/AP3B1/VPS54/RHOBTB3/VPS50/PICALM/TBC1D10C/ABCA1	50
GO:0043123	positive regulation of I-kappaB kinase/NF-kappaB signaling	42/1558	189/18903	2.26778e-09	8.11815e-07	7.05847e-07	GOLT1B/MIER1/NDFIP2/RHOC/S100A13/RIPK2/DHX15/TMEM9B/ECT2/S100A4/TFG/DDX21/LPAR1/CHUK/LAMTOR5/BIRC2/PPM1A/TAB2/NDFIP1/REL/MALT1/TBK1/PELI2/ZDHHC17/TIFA/TLR3/CD36/BCL10/ATP2C1/BIRC3/TNFSF10/IFIT5/MYD88/SECTM1/TRAF5/TRIM22/APOL3/TFRC/CD74/F2R/CLEC7A/HLA-DRB1	42
GO:0043122	regulation of I-kappaB kinase/NF-kappaB signaling	51/1558	255/18903	2.27838e-09	8.11815e-07	7.05847e-07	RORA/GOLT1B/MIER1/NDFIP2/RHOC/S100A13/RIPK2/DHX15/PPM1B/SIRT1/TMEM9B/ECT2/S100A4/TFG/DDX21/LPAR1/CHUK/LAMTOR5/BIRC2/RIOK3/PPM1A/TAB2/NDFIP1/REL/MALT1/TBK1/PELI2/ZDHHC17/TIFA/TLR3/CD36/BCL10/ATP2C1/BIRC3/UFL1/TNFSF10/IFIT5/CARD19/NLRC3/MYD88/SECTM1/TRAF5/TRIM22/APOL3/STAT1/TFRC/CD74/F2R/CLEC7A/HLA-DRB1/WNT5A	51
GO:0002399	MHC class II protein complex assembly	11/1558	16/18903	3.41453e-09	1.08146e-06	9.40294e-07	B2M/HLA-DQA1/HLA-DMA/HLA-DMB/HLA-DRB5/HLA-DRA/HLA-DPA1/HLA-DQB1/HLA-DRB1/HLA-DOA/HLA-DPB1	11
GO:0002503	peptide antigen assembly with MHC class II protein complex	11/1558	16/18903	3.41453e-09	1.08146e-06	9.40294e-07	B2M/HLA-DQA1/HLA-DMA/HLA-DMB/HLA-DRB5/HLA-DRA/HLA-DPA1/HLA-DQB1/HLA-DRB1/HLA-DOA/HLA-DPB1	11
GO:0019884	antigen processing and presentation of exogenous antigen	19/1558	49/18903	3.88143e-09	1.16463e-06	1.01261e-06	B2M/PIKFYVE/AP3B1/HLA-DQA1/LNPEP/HLA-DMA/HLA-DMB/HLA-DRB5/TAP2/HLA-DRA/HLA-DPA1/HLA-DQB1/TAP1/CD74/HLA-F/HLA-E/HLA-DRB1/HLA-DOA/HLA-DPB1	19
GO:0002396	MHC protein complex assembly	12/1558	20/18903	6.35801e-09	1.72605e-06	1.50074e-06	B2M/HLA-DQA1/HLA-DMA/HLA-DMB/HLA-DRB5/HLA-DRA/HLA-DPA1/TAPBPL/HLA-DQB1/HLA-DRB1/HLA-DOA/HLA-DPB1	12
GO:0002501	peptide antigen assembly with MHC protein complex	12/1558	20/18903	6.35801e-09	1.72605e-06	1.50074e-06	B2M/HLA-DQA1/HLA-DMA/HLA-DMB/HLA-DRB5/HLA-DRA/HLA-DPA1/TAPBPL/HLA-DQB1/HLA-DRB1/HLA-DOA/HLA-DPB1	12
GO:0019885	antigen processing and presentation of endogenous peptide antigen via MHC class I	11/1558	17/18903	8.95024e-09	2.31933e-06	2.01659e-06	B2M/HLA-C/IDE/HLA-G/TAP2/HLA-B/ERAP2/TAP1/HLA-F/HLA-E/AZGP1	11
GO:0016050	vesicle organization	62/1558	353/18903	9.42985e-09	2.33737e-06	2.03227e-06	PI4K2B/CHMP2B/AGFG1/VAMP3/WASL/CAV2/SEC24D/RAB27A/EXOC8/BET1/PLEKHF1/RAB8B/CREB1/GNAI3/VAMP4/TBC1D4/RAB11A/TRAPPC13/BLOC1S1/ARL8B/ARFGEF2/PPP6C/RAB14/SEC24A/BLOC1S2/RAB22A/EPS15/TFG/SCARB2/VAMP7/RAB1A/TMED2/ARFGAP3/GOSR2/SAR1A/TRAPPC6B/VPS37A/PIKFYVE/BLOC1S6/AP3M1/YIPF5/VTA1/CHMP1B/SEC23A/EEA1/CD2AP/CUL3/SNAP23/STX3/WASHC4/CHMP3/VPS37B/LAPTM4B/HOOK3/AP3B1/PLEKHF2/SYNJ1/PICALM/SDCBP/CORO1A/F2R/ABC…	62
GO:0006892	post-Golgi vesicle-mediated transport	28/1558	104/18903	1.32425e-08	3.14564e-06	2.73504e-06	VAMP3/SCAMP1/AP1AR/EXOC8/EHD3/RAB10/LYPLA1/GOLGA7/VPS13C/ARFGEF2/RAB14/EPS15/NSF/MON2/DOP1A/EXOC5/ACSL3/SNAP23/EXOC6/VPS13A/VPS54/BLZF1/ATP2C1/RP2/WIPI1/STEAP2/VAMP5/AMN	28
GO:0006486	protein glycosylation	45/1558	225/18903	1.97391e-08	4.32818e-06	3.76321e-06	GALNT7/UBE2J1/C1GALT1/SLC39A8/MGAT4A/GALNT12/GALNT1/IL15/MAN2A1/COG3/STT3B/SERP1/MAGT1/GCNT3/TMEM165/GALNT10/ST3GAL4/GALNT3/ALG6/MAN1A1/PGM3/TET2/DPY19L4/SLC35C1/GFPT1/DPM1/GALNT5/C1GALT1C1/B3GNT2/EDEM3/TMTC3/ALG11/DPY19L3/POGLUT3/FUT3/ALG14/GXYLT1/FUT8/ST3GAL5/FUT6/ENTPD5/ST8SIA4/UGGT2/B4GALT5/ST3GAL1	45
GO:0043413	macromolecule glycosylation	45/1558	225/18903	1.97391e-08	4.32818e-06	3.76321e-06	GALNT7/UBE2J1/C1GALT1/SLC39A8/MGAT4A/GALNT12/GALNT1/IL15/MAN2A1/COG3/STT3B/SERP1/MAGT1/GCNT3/TMEM165/GALNT10/ST3GAL4/GALNT3/ALG6/MAN1A1/PGM3/TET2/DPY19L4/SLC35C1/GFPT1/DPM1/GALNT5/C1GALT1C1/B3GNT2/EDEM3/TMTC3/ALG11/DPY19L3/POGLUT3/FUT3/ALG14/GXYLT1/FUT8/ST3GAL5/FUT6/ENTPD5/ST8SIA4/UGGT2/B4GALT5/ST3GAL1	45
GO:0007249	I-kappaB kinase/NF-kappaB signaling	53/1558	288/18903	2.24446e-08	4.73914e-06	4.12054e-06	RORA/GOLT1B/MIER1/NDFIP2/RHOC/S100A13/RIPK2/DHX15/PPM1B/SIRT1/TMEM9B/ECT2/S100A4/TFG/DDX21/LPAR1/CHUK/LAMTOR5/BIRC2/RIOK3/PPM1A/TAB2/NDFIP1/REL/MALT1/TBK1/PELI2/ZDHHC17/TIFA/TLR3/CD36/BCL10/ATP2C1/BIRC3/UFL1/TNFSF10/IFIT5/CARD19/TBKBP1/NLRC3/MYD88/SECTM1/TRAF5/TRIM22/APOL3/STAT1/TLR2/TFRC/CD74/F2R/CLEC7A/HLA-DRB1/WNT5A	53
GO:0006888	endoplasmic reticulum to Golgi vesicle-mediated transport	32/1558	134/18903	2.96815e-08	6.04337e-06	5.25452e-06	IER3IP1/KDELR2/ARF4/GOLT1B/TMED7/TMED3/TMED5/SEC24D/BET1/TRAPPC13/RNF139/YKT6/COG3/PPP6C/SEC24A/TFG/VAMP7/RAB1A/TMED2/ERGIC2/SAR1A/CNIH4/TRAPPC6B/BCAP29/RINT1/LMAN1/YIPF5/COPB1/SEC23A/CUL3/SPAST/KDELR3	32
GO:0016482	cytosolic transport	37/1558	171/18903	4.23299e-08	8.32147e-06	7.23526e-06	GOLT1B/VAMP3/AP1AR/ARL1/VPS26A/TMEM87B/EHD3/RAB9A/YKT6/VPS13C/ARL8B/TMEM87A/RAB14/RAB5A/EPS15/VPS29/KIF5B/RIC1/RAB21/PIKFYVE/MON2/DOP1A/TBC1D23/EEA1/ARFIP1/SNX6/VPS13A/CHMP3/SNX16/HOOK3/VPS54/RHOBTB3/ATG14/ACTR2/WIPI1/TBC1D10C/CORO1A	37
GO:0042129	regulation of T cell proliferation	38/1558	182/18903	7.58477e-08	1.41263e-05	1.22823e-05	BMI1/KITLG/IL15/CD274/TWSG1/RIPK2/PAWR/CASP3/TGFBR2/SLC7A1/MARCHF7/DLG1/NDFIP1/SOS2/NCK1/JAK2/IL6ST/PTPN22/BID/HLA-DMB/HLA-G/CD55/PPP3CA/IDO1/HLA-DPA1/IRF1/GPNMB/ZAP70/SASH3/TMEM131L/CORO1A/VSIR/TFRC/CD3E/HLA-E/HLA-DRB1/CD6/HLA-DPB1	38
GO:0042098	T cell proliferation	42/1558	212/18903	7.68136e-08	1.41263e-05	1.22823e-05	BMI1/RASGRP1/KITLG/IL15/CD274/TWSG1/RIPK2/PAWR/CASP3/TGFBR2/SLC7A1/MARCHF7/DLG1/NDFIP1/RC3H2/SOS2/NCK1/MALT1/JAK2/IL6ST/PTPN22/BID/HLA-DMB/HLA-G/CD55/CTPS1/PPP3CA/IDO1/HLA-DPA1/IRF1/GPNMB/ZAP70/SASH3/TMEM131L/CORO1A/VSIR/TFRC/CD3E/HLA-E/HLA-DRB1/CD6/HLA-DPB1	42
GO:0070085	glycosylation	46/1558	244/18903	8.95712e-08	1.59577e-05	1.38747e-05	GALNT7/UBE2J1/C1GALT1/SLC39A8/MGAT4A/GALNT12/GALNT1/IL15/MAN2A1/COG3/STT3B/SERP1/MAGT1/GCNT3/COG5/TMEM165/GALNT10/ST3GAL4/GALNT3/ALG6/MAN1A1/PGM3/TET2/DPY19L4/SLC35C1/GFPT1/DPM1/GALNT5/C1GALT1C1/B3GNT2/EDEM3/TMTC3/ALG11/DPY19L3/POGLUT3/FUT3/ALG14/GXYLT1/FUT8/ST3GAL5/FUT6/ENTPD5/ST8SIA4/UGGT2/B4GALT5/ST3GAL1	46
GO:0022407	regulation of cell-cell adhesion	75/1558	490/18903	1.18738e-07	2.05128e-05	1.78353e-05	ZDHHC21/BMI1/RASGRP1/KITLG/IL15/CD274/TWSG1/RIPK2/CYRIB/PAWR/CBFB/CASP3/TGFBR2/SLC7A1/CD47/B2M/MARCHF7/PAG1/DLG1/ST3GAL4/NDFIP1/RC3H2/DENND6A/SMARCE1/NCK1/MALT1/ZBTB1/PIK3CA/AP3B1/HLA-DQA1/JAK2/CHST2/IL6ST/LYN/YES1/HLA-DMA/PTPN22/XBP1/HLA-DMB/HLA-G/BCL10/CD55/FUT3/HLA-DRB5/ITGA4/HLA-DRA/PPP3CA/LCK/IDO1/HLA-DPA1/IRF1/NFAT5/ETS1/HLA-DQB1/GPNMB/ZAP70/SOCS5/SASH3/TMEM131L/CORO1A/ARID2/CEACAM6/VSIR/TF…	75
GO:0045785	positive regulation of cell adhesion	74/1558	484/18903	1.50731e-07	2.5274e-05	2.19749e-05	CDK6/BMI1/RASGRP1/KITLG/IL15/CD274/ARPC2/RIPK2/CYRIB/CBFB/ITGAV/TGFBR2/SLC7A1/AGR2/CD47/B2M/RELL2/ADAM9/ST3GAL4/DENND6A/SMARCE1/NCK1/MALT1/ZBTB1/STX3/PIK3CA/AP3B1/HLA-DQA1/JAK2/CHST2/IL6ST/LYN/YES1/HLA-DMA/PTPN22/XBP1/CD36/HLA-DMB/HLA-G/BCL10/CD55/FUT3/HLA-DRB5/ITGA4/PLEKHA2/HLA-DRA/PPP3CA/ATM/LCK/HLA-DPA1/NFAT5/ETS1/TNFRSF18/HLA-DQB1/ZAP70/SOCS5/SASH3/CSF1/CORO1A/ARID2/CEACAM6/TGM2/VSIR/TFRC/CD7…	74
GO:0032944	regulation of mononuclear cell proliferation	45/1558	243/18903	2.109e-07	3.43525e-05	2.98685e-05	BMI1/KITLG/IL15/CD274/TWSG1/RIPK2/PAWR/CASP3/TGFBR2/SLC7A1/AHR/MARCHF7/DLG1/NDFIP1/SOS2/NCK1/JAK2/IL6ST/LYN/PTPN22/BID/HLA-DMB/HLA-G/CD55/PPP3CA/MYD88/ATM/IDO1/HLA-DPA1/IRF1/GPNMB/ZAP70/SASH3/TMEM131L/CSF1/CORO1A/VSIR/TFRC/CD74/CD3E/HLA-E/HLA-DRB1/IRS2/CD6/HLA-DPB1	45
GO:0002474	antigen processing and presentation of peptide antigen via MHC class I	13/1558	30/18903	2.42961e-07	3.74357e-05	3.25491e-05	B2M/HLA-C/LNPEP/IDE/HLA-G/TAP2/HLA-B/TAPBPL/ERAP2/TAP1/HLA-F/HLA-E/AZGP1	13
GO:0019886	antigen processing and presentation of exogenous peptide antigen via MHC class II	13/1558	30/18903	2.42961e-07	3.74357e-05	3.25491e-05	B2M/PIKFYVE/HLA-DQA1/HLA-DMA/HLA-DMB/HLA-DRB5/HLA-DRA/HLA-DPA1/HLA-DQB1/CD74/HLA-DRB1/HLA-DOA/HLA-DPB1	13
GO:0031398	positive regulation of protein ubiquitination	28/1558	119/18903	2.96855e-07	4.45361e-05	3.87227e-05	RBX1/UBQLN1/UBE2D1/BMI1/NDFIP2/RCHY1/RIPK2/DERL1/CENPX/MARCHF7/MYCBP2/BIRC2/FBXW7/FBXO33/NDFIP1/CUL3/MALT1/DCUN1D5/PTPN22/BCL10/BIRC3/DCUN1D1/DDX3X/ARRDC3/MASTL/FANCI/CDC20/CDC20B	28
GO:0032943	mononuclear cell proliferation	53/1558	312/18903	3.33588e-07	4.84966e-05	4.21663e-05	BMI1/RASGRP1/KITLG/IL15/CD274/TWSG1/RIPK2/PAWR/CASP3/TGFBR2/SLC7A1/AHR/MARCHF7/DLG1/NDFIP1/RC3H2/HPRT1/SOS2/NCK1/MALT1/TBK1/JAK2/IL6ST/LYN/HELLS/PTPN22/BID/HLA-DMB/HLA-G/CD55/CTPS1/PPP3CA/MYD88/ATM/IDO1/HLA-DPA1/IRF1/GPNMB/ZAP70/SASH3/TMEM131L/CSF1/CORO1A/VSIR/TFRC/CD74/CD3E/HLA-E/HLA-DRB1/IRS2/CD6/HLA-DPB1/MS4A1	53
GO:0050670	regulation of lymphocyte proliferation	44/1558	239/18903	3.40267e-07	4.84966e-05	4.21663e-05	BMI1/KITLG/IL15/CD274/TWSG1/RIPK2/PAWR/CASP3/TGFBR2/SLC7A1/AHR/MARCHF7/DLG1/NDFIP1/SOS2/NCK1/JAK2/IL6ST/LYN/PTPN22/BID/HLA-DMB/HLA-G/CD55/PPP3CA/MYD88/ATM/IDO1/HLA-DPA1/IRF1/GPNMB/ZAP70/SASH3/TMEM131L/CORO1A/VSIR/TFRC/CD74/CD3E/HLA-E/HLA-DRB1/IRS2/CD6/HLA-DPB1	44
GO:0002504	antigen processing and presentation of peptide or polysaccharide antigen via MHC class II	14/1558	36/18903	4.21833e-07	5.86554e-05	5.09991e-05	ARL8B/B2M/PIKFYVE/HLA-DQA1/HLA-DMA/HLA-DMB/HLA-DRB5/HLA-DRA/HLA-DPA1/HLA-DQB1/CD74/HLA-DRB1/HLA-DOA/HLA-DPB1	14
GO:0098876	vesicle-mediated transport to the plasma membrane	32/1558	150/18903	4.76703e-07	6.47068e-05	5.62605e-05	DENND1B/VAMP3/EXOC8/RAB8B/VAMP4/VPS26A/EHD3/RAB10/LYPLA1/RAB11A/GOLGA7/SNX4/ARFGEF2/RAB14/EPS15/VPS29/ARL4C/NSF/ACAP2/EXOC5/VPS26C/INPP5F/BLTP1/ACSL3/STX3/EXOC6/BLZF1/VPS50/ATP2C1/STEAP2/VAMP5/AMN	32
GO:0009100	glycoprotein metabolic process	62/1558	395/18903	6.14103e-07	8.12701e-05	7.06618e-05	GALNT7/UBE2J1/C1GALT1/HS2ST1/BPNT2/SLC39A8/MGAT4A/GALNT12/GALNT1/IL15/MAN2A1/PAWR/ITM2B/RNF139/COG3/STT3B/RAB1A/SERP1/NAGLU/MAGT1/GCNT3/TMEM165/GALNT10/ST3GAL4/GALNT3/ALG6/ATP7A/HS3ST1/MAN1A1/RNF103/PGM3/TET2/DPY19L4/SLC35C1/GFPT1/DPM1/GALNT5/HIF1A/HPSE/C1GALT1C1/B3GNT2/EDEM3/TMTC3/ALG11/DPY19L3/GNPTAB/POGLUT3/FUT3/GLCE/ALG14/BMPR1B/GXYLT1/FUT8/ST3GAL5/PHLDA1/AGA/FUT6/ENTPD5/ST8SIA4/UGGT2/B4GALT5…	62
GO:0009225	nucleotide-sugar metabolic process	14/1558	37/18903	6.27238e-07	8.12701e-05	7.06618e-05	GNPDA2/UAP1/GMDS/PGM3/GFPT1/DPM1/UGP2/GNE/FUT8/GNPNAT1/SLC35A3/ENTPD5/UGGT2/TGDS	14
GO:0006493	protein O-linked glycosylation	23/1558	90/18903	7.0905e-07	8.98288e-05	7.81033e-05	GALNT7/C1GALT1/GALNT12/GALNT1/IL15/GCNT3/GALNT10/ST3GAL4/GALNT3/PGM3/TET2/SLC35C1/DPM1/GALNT5/C1GALT1C1/B3GNT2/TMTC3/POGLUT3/FUT3/GXYLT1/FUT6/B4GALT5/ST3GAL1	23
GO:0009101	glycoprotein biosynthetic process	53/1558	321/18903	8.30085e-07	0.000102599	8.92067e-05	GALNT7/UBE2J1/C1GALT1/HS2ST1/SLC39A8/MGAT4A/GALNT12/GALNT1/IL15/MAN2A1/PAWR/ITM2B/COG3/STT3B/SERP1/MAGT1/GCNT3/TMEM165/GALNT10/ST3GAL4/GALNT3/ALG6/ATP7A/HS3ST1/MAN1A1/PGM3/TET2/DPY19L4/SLC35C1/GFPT1/DPM1/GALNT5/C1GALT1C1/B3GNT2/EDEM3/TMTC3/ALG11/DPY19L3/POGLUT3/FUT3/GLCE/ALG14/BMPR1B/GXYLT1/FUT8/ST3GAL5/PHLDA1/FUT6/ENTPD5/ST8SIA4/UGGT2/B4GALT5/ST3GAL1	53
GO:0048872	homeostasis of number of cells	50/1558	296/18903	8.45844e-07	0.000102599	8.92067e-05	CDK6/RB1/KRAS/EZH2/KITLG/PTBP3/RRN3/CASP3/MFHAS1/SLC25A40/SP3/PIK3CB/B2M/IREB2/NF1/RC3H2/SMAP1/L3MBTL3/SOS2/TMOD3/HIF1A/SMAD5/AP3B1/FOXA3/JAK2/VPS54/LYN/SKIL/BCL10/ARID4A/SLC15A4/UFL1/LIPA/SLC7A11/ID2/ETS1/DOCK10/TCIRG1/IKZF1/SASH3/SLC40A1/HSPA1B/NAPEPLD/CSF1/STAT1/CXCL6/CORO1A/CD74/F2R/FAS	50
GO:0046651	lymphocyte proliferation	51/1558	305/18903	9.02562e-07	0.000107198	9.32054e-05	BMI1/RASGRP1/KITLG/IL15/CD274/TWSG1/RIPK2/PAWR/CASP3/TGFBR2/SLC7A1/AHR/MARCHF7/DLG1/NDFIP1/RC3H2/HPRT1/SOS2/NCK1/MALT1/JAK2/IL6ST/LYN/HELLS/PTPN22/BID/HLA-DMB/HLA-G/CD55/CTPS1/PPP3CA/MYD88/ATM/IDO1/HLA-DPA1/IRF1/GPNMB/ZAP70/SASH3/TMEM131L/CORO1A/VSIR/TFRC/CD74/CD3E/HLA-E/HLA-DRB1/IRS2/CD6/HLA-DPB1/MS4A1	51
GO:0002720	positive regulation of cytokine production involved in immune response	21/1558	79/18903	1.06307e-06	0.000123685	0.00010754	DENND1B/RIPK2/SIRT1/B2M/DDX21/MALT1/TLR3/CD36/HLA-G/BCL10/CD55/MYD88/IL1R1/FZD5/SASH3/CD74/HLA-F/LACC1/CLEC7A/HLA-E/WNT5A	21
GO:0002495	antigen processing and presentation of peptide antigen via MHC class II	13/1558	34/18903	1.37606e-06	0.000156898	0.000136418	B2M/PIKFYVE/HLA-DQA1/HLA-DMA/HLA-DMB/HLA-DRB5/HLA-DRA/HLA-DPA1/HLA-DQB1/CD74/HLA-DRB1/HLA-DOA/HLA-DPB1	13
GO:0002696	positive regulation of leukocyte activation	67/1558	450/18903	1.52013e-06	0.000169927	0.000147746	BMI1/RASGRP1/KITLG/IL15/CD274/PLPP6/RIPK2/CYRIB/CBFB/TGFBR2/SLC7A1/SNX4/CD47/VAMP7/B2M/BLOC1S6/RIF1/SMARCE1/NCK1/MALT1/ZBTB1/CTSC/PIK3CA/AP3B1/HLA-DQA1/JAK2/IL6ST/LYN/YES1/HLA-DMA/PTPN22/XBP1/HLA-DMB/HLA-G/BCL10/CD55/PLA2G4A/HLA-DRB5/CD2/HLA-DRA/PPP3CA/MYD88/LCK/TRBC2/HLA-DPA1/IL15RA/HLA-DQB1/ZAP70/SOCS5/SASH3/CORO1A/ARID2/VSIR/TFRC/CD74/HLA-F/CD3E/CLEC7A/HLA-E/HLA-DRB1/IL2RG/RUNX3/IRS2/HLA-DOA/C…	67
GO:0070663	regulation of leukocyte proliferation	46/1558	269/18903	1.62145e-06	0.000177767	0.000154563	BMI1/KITLG/IL15/CD274/TWSG1/RIPK2/PAWR/CASP3/TGFBR2/SLC7A1/AHR/MARCHF7/DLG1/NDFIP1/NF1/SOS2/NCK1/JAK2/IL6ST/LYN/PTPN22/BID/HLA-DMB/HLA-G/CD55/PPP3CA/MYD88/ATM/IDO1/HLA-DPA1/IRF1/GPNMB/ZAP70/SASH3/TMEM131L/CSF1/CORO1A/VSIR/TFRC/CD74/CD3E/HLA-E/HLA-DRB1/IRS2/CD6/HLA-DPB1	46
GO:1903322	positive regulation of protein modification by small protein conjugation or removal	29/1558	137/18903	1.91027e-06	0.00020548	0.000178659	RBX1/UBQLN1/UBE2D1/BMI1/NDFIP2/RCHY1/RIPK2/DERL1/CENPX/MARCHF7/MYCBP2/BIRC2/FBXW7/FBXO33/GNL3/NDFIP1/CUL3/MALT1/DCUN1D5/PTPN22/BCL10/BIRC3/DCUN1D1/DDX3X/ARRDC3/MASTL/FANCI/CDC20/CDC20B	29
GO:0070661	leukocyte proliferation	55/1558	348/18903	2.10574e-06	0.000222312	0.000193293	BMI1/RASGRP1/KITLG/IL15/CD274/TWSG1/RIPK2/PAWR/CASP3/TGFBR2/SLC7A1/AHR/MARCHF7/DLG1/NDFIP1/NF1/RC3H2/HPRT1/SOS2/NCK1/MALT1/TBK1/JAK2/IL6ST/LYN/HELLS/PTPN22/BID/HLA-DMB/HLA-G/CD55/CTPS1/PPP3CA/MYD88/ATM/IDO1/HLA-DPA1/IRF1/GPNMB/TCIRG1/ZAP70/SASH3/TMEM131L/CSF1/CORO1A/VSIR/TFRC/CD74/CD3E/HLA-E/HLA-DRB1/IRS2/CD6/HLA-DPB1/MS4A1	55
GO:0051656	establishment of organelle localization	65/1558	437/18903	2.24697e-06	0.000232909	0.000202507	CHMP2B/WASL/FAM83D/AP1AR/RAB27A/RASGRP1/EXOC8/EIF6/KAT2B/S100A13/RAB11A/TRAPPC13/BLOC1S1/YKT6/UBE2B/NMD3/SNX4/PPP6C/BLOC1S2/TFG/VAMP7/RAB1A/TMED2/DLG1/ARFGAP3/SAR1A/TRAPPC6B/KIF5B/SEH1L/TBC1D23/EXOC5/BLOC1S6/EML4/AP3M1/CHMP1B/RIOK2/OPA1/CUL3/SNAP23/SPDL1/EXOC6/HIF1A/CHMP3/PDCD10/HOOK3/AP3B1/FAM91A1/LYN/CCDC186/SPAST/WIPI1/SYNJ1/XPO1/CD84/MAD2L1/ITGA4/SUN2/PICALM/ATM/ABCE1/TCIRG1/SDCBP/CCNB1/BORCS…	65
GO:0002718	regulation of cytokine production involved in immune response	26/1558	118/18903	2.92576e-06	0.000297853	0.000258974	DENND1B/UBE2J1/ATG5/RIPK2/SIRT1/B2M/DDX21/MALT1/TLR3/CD36/HLA-G/ACP5/BCL10/IRAK3/CD55/MYD88/IL1R1/FZD5/SASH3/CD74/HLA-F/LACC1/CLEC7A/CD96/HLA-E/WNT5A	26
GO:0035966	response to topologically incorrect protein	32/1558	163/18903	3.22516e-06	0.000317868	0.000276376	TRAM1/EIF2AK3/HSPA13/DNAJB14/UBE2W/HSPA14/DERL1/AGR2/STT3B/UBXN4/YOD1/SERP1/TMED2/TMEM33/DNAJB9/EIF2S1/NCK1/CUL3/CREBRF/CREB3L1/EDEM3/HERPUD1/XBP1/KLHL15/CREBZF/DNAJC3/UFL1/JKAMP/ERO1A/CREB3L4/HSPA1B/UGGT2	32
GO:0031396	regulation of protein ubiquitination	38/1558	210/18903	3.23388e-06	0.000317868	0.000276376	RBX1/UBQLN1/UBE2D1/BMI1/BUB3/ATG5/NDFIP2/SPOPL/RCHY1/RIPK2/TGFBR1/DERL1/CENPX/MARCHF7/MYCBP2/BIRC2/FBXW7/FBXO33/NDFIP1/PLAA/CUL3/MALT1/DCUN1D5/HERPUD1/PTPN22/BCL10/BIRC3/DCUN1D1/MAD2L1/UFL1/DDX3X/ARRDC3/MASTL/FANCI/HSPA1B/CDC20/IVNS1ABP/CDC20B	38
GO:0006470	protein dephosphorylation	44/1558	261/18903	3.98357e-06	0.000380207	0.000330578	PPP3R1/PPP2CA/PPP1CB/PPTC7/PPP1R12A/CTDSPL2/PPM1B/PPP1CC/MFHAS1/PPP3CC/PPP6C/PTPN4/STYX/PTP4A1/MTMR6/PPP1R2/CSNK2B/PPM1A/RNGTT/PPP4R3A/PDP1/PPP2R5A/NCEH1/ARPP19/PTPN12/NCK1/PTP4A2/RCAN1/CNEP1R1/JAK2/PTPN22/SDHAF2/PPM1M/PPP1R16B/UBLCP1/TIPRL/MASTL/PPP3CA/SMPD1/DUSP6/PTPN7/ITGA1/PPP4R2/CTTNBP2NL	44
GO:0002367	cytokine production involved in immune response	26/1558	120/18903	4.06817e-06	0.000380207	0.000330578	DENND1B/UBE2J1/ATG5/RIPK2/SIRT1/B2M/DDX21/MALT1/TLR3/CD36/HLA-G/ACP5/BCL10/IRAK3/CD55/MYD88/IL1R1/FZD5/SASH3/CD74/HLA-F/LACC1/CLEC7A/CD96/HLA-E/WNT5A	26
GO:0002821	positive regulation of adaptive immune response	26/1558	120/18903	4.06817e-06	0.000380207	0.000330578	DENND1B/CD274/RIPK2/CYRIB/SIRT1/B2M/RIF1/MALT1/ZBTB1/JAK2/IL6ST/HLA-G/CD55/PLA2G4A/TAP2/HLA-DRA/HLA-B/IL1R1/FZD5/SASH3/TFRC/HLA-F/CLEC7A/HLA-E/HLA-DRB1/AZGP1	26
GO:0051251	positive regulation of lymphocyte activation	60/1558	400/18903	4.16711e-06	0.000383173	0.000333157	BMI1/RASGRP1/KITLG/IL15/CD274/RIPK2/CYRIB/CBFB/TGFBR2/SLC7A1/CD47/B2M/BLOC1S6/RIF1/SMARCE1/NCK1/MALT1/ZBTB1/PIK3CA/AP3B1/HLA-DQA1/JAK2/IL6ST/LYN/YES1/HLA-DMA/PTPN22/XBP1/HLA-DMB/HLA-G/BCL10/CD55/HLA-DRB5/HLA-DRA/PPP3CA/MYD88/LCK/TRBC2/HLA-DPA1/IL15RA/HLA-DQB1/ZAP70/SOCS5/SASH3/CORO1A/ARID2/VSIR/TFRC/CD74/HLA-F/CD3E/CLEC7A/HLA-E/HLA-DRB1/IL2RG/RUNX3/IRS2/HLA-DOA/CD6/HLA-DPB1	60
GO:0002711	positive regulation of T cell mediated immunity	17/1558	60/18903	4.32474e-06	0.000391355	0.000340271	DENND1B/CYRIB/B2M/MALT1/ZBTB1/HLA-G/CD55/TAP2/HLA-DRA/HLA-B/IL1R1/FZD5/SASH3/HLA-F/HLA-E/HLA-DRB1/AZGP1	17
GO:0044772	mitotic cell cycle phase transition	68/1558	473/18903	4.39909e-06	0.000391863	0.000340713	CDK6/CDKN1B/RB1/CDK17/PPP2CA/EZH2/CCNG1/BUB3/ZNF207/RAB11A/TAOK1/FBXL17/WAC/CDC73/PPP6C/RPL26/DLG1/FBXL3/BARD1/CUL5/LATS2/RINT1/APPL1/TAF2/RIOK2/ARPP19/GEN1/SMARCE1/BACH1/CCNG2/CUL3/CDK1/GSPT1/SPDL1/TMOD3/TRIAP1/BCAT1/ANLN/ZNF655/CDC27/BID/SMC5/SPAST/NBN/MAD2L1/DDX3X/MASTL/PPP3CA/SDE2/ATM/E2F7/NPAT/ZWILCH/ID2/SLFN11/TPD52L1/CTDSPL/GPNMB/CASP2/CDC20/RHOU/CCNO/CCNB1/ARID2/CRLF3/CDT1/ZWINT/NABP1	68
GO:0001776	leukocyte homeostasis	23/1558	100/18903	5.0131e-06	0.00043393	0.000377289	KITLG/CASP3/PIK3CB/NF1/RC3H2/SOS2/HIF1A/LYN/SKIL/BCL10/SLC15A4/LIPA/SLC7A11/DOCK10/TCIRG1/SASH3/SLC40A1/CSF1/CXCL6/CORO1A/CD74/F2R/FAS	23
GO:0016266	O-glycan processing	14/1558	43/18903	5.02358e-06	0.00043393	0.000377289	GALNT7/C1GALT1/GALNT12/GALNT1/GCNT3/GALNT10/ST3GAL4/GALNT3/GALNT5/C1GALT1C1/B3GNT2/GXYLT1/B4GALT5/ST3GAL1	14
GO:0097193	intrinsic apoptotic signaling pathway	48/1558	298/18903	5.43395e-06	0.000462372	0.000402018	UBQLN1/EIF2AK3/SGMS1/GSKIP/PLEKHF1/CYLD/RRN3/CASP3/SIRT1/PIK3CB/RPL26/FNIP2/MARCHF7/MOAP1/FBXW7/CUL5/ARL6IP5/OPA1/PDK1/NCK1/CUL3/HIF1A/PDCD10/CREB3L1/TRIAP1/JAK2/HERPUD1/HELLS/XBP1/JMY/BID/DNM1L/IFI16/SKIL/NBN/CYP1B1/DDX3X/ATM/LCK/AEN/TMEM117/DAPK2/ERO1A/CASP2/SFN/CD74/IVNS1ABP/NKX3-1	48
GO:0050867	positive regulation of cell activation	67/1558	467/18903	5.53698e-06	0.00046421	0.000403617	BMI1/RASGRP1/KITLG/IL15/CD274/PLPP6/RIPK2/CYRIB/CBFB/TGFBR2/SLC7A1/SNX4/CD47/VAMP7/B2M/BLOC1S6/RIF1/SMARCE1/NCK1/MALT1/ZBTB1/CTSC/PIK3CA/AP3B1/HLA-DQA1/JAK2/IL6ST/LYN/YES1/HLA-DMA/PTPN22/XBP1/HLA-DMB/HLA-G/BCL10/CD55/PLA2G4A/HLA-DRB5/CD2/HLA-DRA/PPP3CA/MYD88/LCK/TRBC2/HLA-DPA1/IL15RA/HLA-DQB1/ZAP70/SOCS5/SASH3/CORO1A/ARID2/VSIR/TFRC/CD74/HLA-F/CD3E/CLEC7A/HLA-E/HLA-DRB1/IL2RG/RUNX3/IRS2/HLA-DOA/C…	67
GO:0046634	regulation of alpha-beta T cell activation	25/1558	115/18903	5.81533e-06	0.000480481	0.000417763	CD274/TWSG1/RIPK2/CBFB/TGFBR2/NDFIP1/RC3H2/MALT1/AP3B1/JAK2/PTPN22/CD55/HLA-DRA/IRF1/PRDM1/ZAP70/SOCS5/SASH3/VSIR/CD3E/BATF/HLA-E/HLA-DRB1/IL2RG/RUNX3	25
GO:0062197	cellular response to chemical stress	53/1558	345/18903	7.46655e-06	0.000608097	0.000528722	RBX1/UBQLN1/EIF2AK3/STK26/CPEB2/PRKAA1/PRKAA2/GSKIP/EZH2/ATG5/LRRC8D/PAWR/SLC25A24/CASP3/SIRT1/ECT2/GCH1/MAPK8/CHUK/FBXW7/EIF2S1/ARL6IP5/FBP1/ATP7A/PDK1/CDK1/PLA2R1/HIF1A/STAU2/PIK3CA/PDCD10/JAK2/PLEKHA1/CD36/PNPLA8/LANCL1/OSER1/OXSR1/PYCR1/MET/CYP1B1/DDX3X/PDE8A/AQP5/ATM/STK39/SLC7A11/MGST1/BMAL1/NFAT5/FUT8/HSPA1B/FAS	53
GO:0034976	response to endoplasmic reticulum stress	43/1558	261/18903	9.2701e-06	0.00074435	0.000647189	UBQLN1/EIF2AK3/UBE2J1/TMX1/DNAJB14/RNF139/DERL1/GORASP2/SIRT1/AGR2/STT3B/UBXN4/YOD1/SERP1/TMED2/TMEM33/DNAJB9/EIF2S1/MAN1A1/RNF103/OPA1/NCK1/SEL1L/USP14/CREB3L1/EDEM3/TMTC3/HERPUD1/XBP1/CERT1/UBE4A/RNFT1/USP25/CREBZF/DNAJC3/UFL1/DDX3X/SVIP/TMEM117/JKAMP/ERO1A/CREB3L4/UGGT2	43
GO:0016311	dephosphorylation	54/1558	357/18903	9.72148e-06	0.000769753	0.000669276	PPP3R1/PPP2CA/PPP1CB/BPNT2/PLPP6/PPTC7/PPP1R12A/CTDSPL2/PPM1B/PPP1CC/MFHAS1/IMPA1/PPP3CC/PPP6C/PTPN4/STYX/PTP4A1/MTMR6/PPP1R2/CSNK2B/PPM1A/INPP5F/FBP1/RNGTT/PPP4R3A/PDP1/PPP2R5A/MTMR9/NCEH1/ARPP19/PTPN12/NCK1/PTP4A2/RCAN1/CNEP1R1/JAK2/PTPN22/SDHAF2/PPM1M/ACP5/PPP1R16B/SYNJ1/UBLCP1/TIPRL/MASTL/PPP3CA/SMPD1/DUSP6/PTPN7/ITGA1/PPP4R2/SEMA4D/CTTNBP2NL/ALPL	54
GO:0007033	vacuole organization	37/1558	213/18903	1.14024e-05	0.000890478	0.000774243	CHMP2B/UBQLN1/RAB33B/TMEM106B/ATG5/MAN2A1/TMEM39A/SNX4/ARL8B/FEZ2/SH3GLB1/RAB14/RAB5A/SCARB2/RAB1A/NAGLU/TBC1D12/MOAP1/TMEM165/TMEM199/PIKFYVE/CHMP1B/SNX18/CHMP3/LAPTM4B/HOOK3/AP3B1/ATG12/ATG14/GNPTAB/WIPI1/ATP10B/MFSD8/TCIRG1/CORO1A/GRN/ABCA1	37
GO:0006487	protein N-linked glycosylation	18/1558	71/18903	1.26477e-05	0.000972848	0.000845861	UBE2J1/SLC39A8/MGAT4A/STT3B/MAGT1/TMEM165/ALG6/PGM3/GFPT1/DPM1/ALG11/FUT3/ALG14/FUT8/FUT6/ENTPD5/UGGT2/ST3GAL1	18
GO:0035967	cellular response to topologically incorrect protein	25/1558	120/18903	1.27984e-05	0.000972848	0.000845861	EIF2AK3/HSPA13/DNAJB14/UBE2W/HSPA14/DERL1/AGR2/YOD1/SERP1/TMED2/TMEM33/DNAJB9/EIF2S1/NCK1/CUL3/CREB3L1/HERPUD1/XBP1/KLHL15/CREBZF/UFL1/ERO1A/CREB3L4/HSPA1B/UGGT2	25
GO:0042102	positive regulation of T cell proliferation	23/1558	106/18903	1.40071e-05	0.00105072	0.000913567	BMI1/KITLG/IL15/CD274/RIPK2/TGFBR2/SLC7A1/NCK1/JAK2/IL6ST/PTPN22/HLA-DMB/CD55/PPP3CA/HLA-DPA1/ZAP70/SASH3/CORO1A/TFRC/CD3E/HLA-E/CD6/HLA-DPB1	23
GO:0070423	nucleotide-binding oligomerization domain containing signaling pathway	10/1558	25/18903	1.44999e-05	0.00107356	0.000933427	CYLD/RIPK2/BIRC2/OTULIN/PTPN22/BIRC3/SLC15A4/HSPA1B/LACC1/SLC15A2	10
GO:0002824	positive regulation of adaptive immune response based on somatic recombination of immune receptors built from immunoglobulin superfamily domains	24/1558	114/18903	1.57491e-05	0.0011511	0.00100084	DENND1B/CD274/RIPK2/CYRIB/B2M/RIF1/MALT1/ZBTB1/JAK2/HLA-G/CD55/PLA2G4A/TAP2/HLA-DRA/HLA-B/IL1R1/FZD5/SASH3/TFRC/HLA-F/CLEC7A/HLA-E/HLA-DRB1/AZGP1	24
GO:0046633	alpha-beta T cell proliferation	14/1558	47/18903	1.60019e-05	0.00115477	0.00100404	IL15/CD274/TWSG1/RIPK2/TGFBR2/NDFIP1/JAK2/PTPN22/CD55/IRF1/ZAP70/VSIR/CD3E/HLA-E	14
GO:1903131	mononuclear cell differentiation	66/1558	473/18903	1.62273e-05	0.0011564	0.00100545	CDK6/RORA/BMI1/RASGRP1/EZH2/TPD52/ATG5/IL15/RIPK2/CBFB/TGFBR2/SP3/B2M/CTNNBIP1/ITGB8/DNAJB9/NDFIP1/ATP7A/RC3H2/FNIP1/RBPJ/SMARCE1/SOS2/MALT1/ZBTB1/AP3B1/LYN/PTPN22/XBP1/HDAC9/IFI16/HLA-G/LRRC8A/ITGA4/CD2/HLA-DRA/ATM/HLA-B/LCK/ID2/IRF1/IL15RA/DOCK10/PRDM1/FZD5/TCIRG1/ZAP70/SOCS5/IKZF1/SASH3/TMEM131L/CSF1/CD3D/BATF2/CD8A/ARID2/VSIR/CD74/CD3E/BATF/HLA-DRB1/IL2RG/RUNX3/HLA-DOA/ST3GAL1/MS4A1	66
GO:0002224	toll-like receptor signaling pathway	25/1558	123/18903	2.0013e-05	0.00139789	0.00121542	UBQLN1/RPS6KA3/RIPK2/WDFY1/MFHAS1/BIRC2/APPL1/S100A14/PJA2/AP3B1/TLR3/RAB11FIP2/LYN/PTPN22/CD36/BCL10/IRAK3/BIRC3/SLC15A4/DDX3X/MYD88/IRF1/BPIFB1/RFTN1/TLR2	25
GO:1903320	regulation of protein modification by small protein conjugation or removal	41/1558	252/18903	2.01065e-05	0.00139789	0.00121542	RBX1/UBQLN1/UBE2D1/BMI1/BUB3/ATG5/NDFIP2/SPOPL/RCHY1/RIPK2/TGFBR1/DERL1/CENPX/COPS2/MARCHF7/MYCBP2/BIRC2/FBXW7/FBXO33/GNL3/NDFIP1/PLAA/CUL3/MALT1/HIF1A/DCUN1D5/HERPUD1/PTPN22/BCL10/BIRC3/DCUN1D1/MAD2L1/UFL1/DDX3X/ARRDC3/MASTL/FANCI/HSPA1B/CDC20/IVNS1ABP/CDC20B	41
GO:1901991	negative regulation of mitotic cell cycle phase transition	34/1558	194/18903	2.10031e-05	0.00143018	0.00124349	CDKN1B/RB1/EZH2/CCNG1/BUB3/ZNF207/TAOK1/WAC/CDC73/RPL26/DLG1/BARD1/RINT1/GEN1/CDK1/SPDL1/TRIAP1/ZNF655/NBN/MAD2L1/SDE2/ATM/E2F7/ZWILCH/SLFN11/CTDSPL/GPNMB/CASP2/CDC20/CCNB1/CRLF3/CDT1/ZWINT/NABP1	34
GO:0007034	vacuolar transport	30/1558	162/18903	2.13588e-05	0.00143018	0.00124349	CHMP2B/TMEM106B/PLEKHF1/NDFIP2/EHD3/VPS13C/ARL8B/LEPROTL1/SCARB2/VAMP7/LAMP2/VPS37A/RAB12/AP3M1/NDFIP1/VTA1/CHMP1B/SCYL2/BIN1/VPS13A/CHMP3/SNX16/VPS37B/HOOK3/AP3B1/VPS54/ATG14/GNPTAB/PLEKHF2/GRN	30
GO:0043087	regulation of GTPase activity	55/1558	376/18903	2.15256e-05	0.00143018	0.00124349	CCPG1/DENND1B/CPEB2/CAV2/RASGRP1/EZH2/RAP1A/FGD6/TBC1D4/RICTOR/ECT2/LRCH1/TBC1D15/TMED2/ARAP2/RASA2/TBC1D12/RAP1GDS1/TRAPPC6B/RIC1/EIF2S1/TBC1D9/NF1/ARHGAP12/ASAP2/SNX18/SOS2/ELMOD2/BIN1/ARHGEF16/ASAP1/RALGPS2/RAB11FIP2/RGS1/RAPGEF5/ARHGAP29/MET/SNX13/PICALM/SIPA1L2/SH3BP1/TBC1D8B/RABGAP1L/GMIP/DOCK10/TBC1D10C/GRHL3/SEMA4D/FGD4/RGS10/TGM2/TBC1D30/F2R/RAPGEF3/WNT5A	55
GO:0006903	vesicle targeting	17/1558	67/18903	2.1632e-05	0.00143018	0.00124349	AP1AR/EXOC8/TRAPPC13/YKT6/PPP6C/TFG/TMED2/ARFGAP3/SAR1A/TRAPPC6B/TBC1D23/EXOC5/CUL3/SNAP23/EXOC6/FAM91A1/WIPI1	17
GO:0035872	nucleotide-binding domain, leucine rich repeat containing receptor signaling pathway	10/1558	26/18903	2.18252e-05	0.00143018	0.00124349	CYLD/RIPK2/BIRC2/OTULIN/PTPN22/BIRC3/SLC15A4/HSPA1B/LACC1/SLC15A2	10
GO:0002221	pattern recognition receptor signaling pathway	33/1558	187/18903	2.38736e-05	0.00152925	0.00132964	UBQLN1/RPS6KA3/CYLD/RIPK2/WDFY1/MFHAS1/BIRC2/RIOK3/APPL1/S100A14/PJA2/USP15/OTULIN/AP3B1/TIFA/TLR3/RAB11FIP2/LYN/PTPN22/CD36/BCL10/IRAK3/BIRC3/SLC15A4/DDX3X/MYD88/IRF1/BPIFB1/RFTN1/HSPA1B/TLR2/LACC1/SLC15A2	33
GO:0002700	regulation of production of molecular mediator of immune response	33/1558	187/18903	2.38736e-05	0.00152925	0.00132964	DENND1B/UBE2J1/ATG5/RIPK2/SIRT1/B2M/DDX21/DNAJB9/RIF1/NDFIP1/MALT1/TLR3/PTPN22/XBP1/CD36/HLA-G/ACP5/BCL10/IRAK3/SLC15A4/CD55/MYD88/IL1R1/FZD5/SASH3/TFRC/CD74/HLA-F/LACC1/CLEC7A/CD96/HLA-E/WNT5A	33
GO:0034341	response to interferon-gamma	27/1558	140/18903	2.56861e-05	0.00161833	0.00140709	VAMP3/CD58/GCH1/CD47/KIF5B/IFNGR1/STXBP3/PDE12/JAK2/TLR3/SYNCRIP/ACTR2/ZYX/ACTR3/HLA-DPA1/CXCL16/IRF1/IFNGR2/CDC42EP2/STAT1/KYNU/TLR2/CD74/NLRC5/GBP2/GBP4/WNT5A	27
GO:0006895	Golgi to endosome transport	8/1558	17/18903	2.58319e-05	0.00161833	0.00140709	AP1AR/VPS13C/RAB14/EPS15/MON2/DOP1A/VPS13A/WIPI1	8
GO:0002702	positive regulation of production of molecular mediator of immune response	26/1558	133/18903	2.81823e-05	0.00174085	0.00151361	DENND1B/RIPK2/SIRT1/B2M/DDX21/DNAJB9/RIF1/MALT1/TLR3/PTPN22/XBP1/CD36/HLA-G/BCL10/CD55/MYD88/IL1R1/FZD5/SASH3/TFRC/CD74/HLA-F/LACC1/CLEC7A/HLA-E/WNT5A	26
GO:0007032	endosome organization	21/1558	96/18903	2.8693e-05	0.00174085	0.00151361	PI4K2B/CHMP2B/RAB27A/EXOC8/PLEKHF1/VAMP4/RAB11A/ARFGEF2/RAB22A/SCARB2/VPS37A/VTA1/CHMP1B/EEA1/WASHC4/CHMP3/VPS37B/LAPTM4B/HOOK3/PLEKHF2/SYNJ1	21
GO:0016236	macroautophagy	48/1558	317/18903	2.8931e-05	0.00174085	0.00151361	CHMP2B/UBQLN1/RAB33B/PRKAA2/ATP6V1G1/EXOC8/ATG5/GNAI3/VPS26A/RIPK2/CASP3/TMEM39A/VPS13C/SNX4/SIRT1/ARL8B/WAC/FEZ2/SH3GLB1/RAB5A/RAB1A/YOD1/LAMP2/TBC1D12/MAPK8/SCOC/MOAP1/VPS37A/PIKFYVE/VTA1/CHMP1B/SNX18/PLAA/SNX6/HIF1A/TBK1/CHMP3/VPS37B/PIK3CA/ATG12/ATG14/BNIP3L/SESN3/RIMOC1/WIPI1/UFL1/MFSD8/TCIRG1	48
GO:0051650	establishment of vesicle localization	34/1558	197/18903	2.91796e-05	0.00174085	0.00151361	WASL/AP1AR/RAB27A/RASGRP1/EXOC8/RAB11A/TRAPPC13/BLOC1S1/YKT6/PPP6C/BLOC1S2/TFG/RAB1A/TMED2/ARFGAP3/SAR1A/TRAPPC6B/KIF5B/TBC1D23/EXOC5/BLOC1S6/AP3M1/CUL3/SNAP23/EXOC6/AP3B1/FAM91A1/CCDC186/WIPI1/SYNJ1/ITGA4/PICALM/TCIRG1/SDCBP	34
GO:0006986	response to unfolded protein	27/1558	141/18903	2.93144e-05	0.00174085	0.00151361	TRAM1/EIF2AK3/HSPA13/HSPA14/DERL1/AGR2/STT3B/UBXN4/YOD1/SERP1/TMED2/TMEM33/DNAJB9/EIF2S1/NCK1/CREBRF/CREB3L1/EDEM3/HERPUD1/XBP1/CREBZF/DNAJC3/UFL1/JKAMP/ERO1A/CREB3L4/HSPA1B	27
GO:0002819	regulation of adaptive immune response	34/1558	198/18903	3.24912e-05	0.00190961	0.00166035	DENND1B/CD274/RIPK2/CYRIB/SIRT1/B2M/AHR/RIF1/NDFIP1/RC3H2/MALT1/ZBTB1/JAK2/IL6ST/HLA-G/SLC15A4/CD55/PLA2G4A/TAP2/HLA-DRA/HLA-B/IL1R1/IRF1/FZD5/SOCS5/SASH3/ADCY7/TFRC/HLA-F/CLEC7A/BATF/HLA-E/HLA-DRB1/AZGP1	34
GO:0030098	lymphocyte differentiation	59/1558	419/18903	3.4402e-05	0.00198141	0.00172277	CDK6/RORA/BMI1/RASGRP1/EZH2/TPD52/ATG5/IL15/RIPK2/CBFB/TGFBR2/SP3/B2M/DNAJB9/NDFIP1/ATP7A/RC3H2/FNIP1/RBPJ/SMARCE1/SOS2/MALT1/ZBTB1/AP3B1/PTPN22/XBP1/HDAC9/HLA-G/LRRC8A/ITGA4/CD2/HLA-DRA/ATM/LCK/ID2/IRF1/IL15RA/DOCK10/PRDM1/FZD5/TCIRG1/ZAP70/SOCS5/IKZF1/SASH3/TMEM131L/CD3D/CD8A/ARID2/VSIR/CD74/CD3E/BATF/HLA-DRB1/IL2RG/RUNX3/HLA-DOA/ST3GAL1/MS4A1	59
GO:0046631	alpha-beta T cell activation	31/1558	174/18903	3.44079e-05	0.00198141	0.00172277	RORA/IL15/CD274/TWSG1/RIPK2/CBFB/TGFBR2/NDFIP1/ATP7A/RC3H2/MALT1/AP3B1/JAK2/PTPN22/CD55/HLA-DRA/TRBC2/IRF1/PRDM1/TCIRG1/ZAP70/SOCS5/SASH3/CD3D/VSIR/CD3E/BATF/HLA-E/HLA-DRB1/IL2RG/RUNX3	31
GO:0046640	regulation of alpha-beta T cell proliferation	13/1558	44/18903	3.52582e-05	0.00201007	0.00174769	CD274/TWSG1/RIPK2/TGFBR2/NDFIP1/JAK2/PTPN22/CD55/IRF1/ZAP70/VSIR/CD3E/HLA-E	13
GO:0001819	positive regulation of cytokine production	66/1558	486/18903	3.83791e-05	0.00216633	0.00188356	DENND1B/RORA/EIF2AK3/CD58/RASGRP1/PDE4D/IL15/CD274/S100A13/RIPK2/CYRIB/SIRT1/ARFGEF2/RAB1A/B2M/DDX21/CHUK/LAMTOR5/RIOK3/IFNGR1/APPL1/IL1RAP/MALT1/F3/PLA2R1/HIF1A/TBK1/STMP1/HPSE/JAK2/IL6ST/TLR3/PTPN22/XBP1/CD36/IFI16/HLA-G/BCL10/IRAK3/CD84/CD55/CYP1B1/DDX3X/CD2/MYD88/IDO1/IL1R1/HLA-DPA1/IRF1/FZD5/RFTN1/SASH3/HSPA1B/STAT1/TLR2/CD74/F2R/HLA-F/CD3E/LACC1/CLEC7A/BATF/HLA-E/CD6/WNT5A/HLA-DPB1	66
GO:0016032	viral process	59/1558	421/18903	3.95374e-05	0.00217838	0.00189404	CHMP2B/CAV2/CCNT2/MGAT4A/ATG5/GALNT1/FMR1/MAN2A1/SPCS3/CCNT1/ITGAV/TMEM39A/SLC7A1/ARL8B/EPS15/SCARB2/RAB1A/LAMTOR5/VPS37A/PKN2/PIKFYVE/ST3GAL4/DEK/UBP1/VTA1/CHMP1B/PDE12/ZDHHC20/CXCR6/CDK1/CHMP3/MDFIC/VPS37B/WWP1/CHD1/ATG12/RESF1/ZNF639/IDE/IFI16/CD55/CXADR/DDX3X/IFIT5/YTHDC2/SMPD1/SRPK1/CCR5/ITGB7/FUT8/TRIM22/SERPINB3/HSPA1B/STAT1/TRIM31/TFRC/CD74/HLA-DRB1/ST3GAL1	59
GO:0007040	lysosome organization	21/1558	98/18903	3.9739e-05	0.00217838	0.00189404	CHMP2B/TMEM106B/ARL8B/RAB14/SCARB2/NAGLU/TMEM165/TMEM199/PIKFYVE/CHMP1B/CHMP3/LAPTM4B/HOOK3/AP3B1/GNPTAB/ATP10B/MFSD8/TCIRG1/CORO1A/GRN/ABCA1	21
GO:0080171	lytic vacuole organization	21/1558	98/18903	3.9739e-05	0.00217838	0.00189404	CHMP2B/TMEM106B/ARL8B/RAB14/SCARB2/NAGLU/TMEM165/TMEM199/PIKFYVE/CHMP1B/CHMP3/LAPTM4B/HOOK3/AP3B1/GNPTAB/ATP10B/MFSD8/TCIRG1/CORO1A/GRN/ABCA1	21
GO:0002456	T cell mediated immunity	23/1558	113/18903	4.13478e-05	0.00224499	0.00195195	DENND1B/RAB27A/CYRIB/B2M/AHR/HPRT1/MALT1/ZBTB1/CTSC/HLA-G/CD55/TAP2/HLA-DRA/HLA-B/IL1R1/FZD5/RFTN1/SASH3/CD8A/HLA-F/HLA-E/HLA-DRB1/AZGP1	23
GO:0016241	regulation of macroautophagy	29/1558	160/18903	4.3917e-05	0.00235889	0.00205098	UBQLN1/PRKAA2/ATP6V1G1/EXOC8/ATG5/GNAI3/VPS26A/RIPK2/CASP3/TMEM39A/VPS13C/SNX4/SIRT1/WAC/FEZ2/SH3GLB1/MAPK8/SCOC/MOAP1/SNX18/SNX6/HIF1A/TBK1/PIK3CA/ATG12/ATG14/BNIP3L/SESN3/WIPI1	29
GO:0044088	regulation of vacuole organization	14/1558	51/18903	4.42731e-05	0.00235889	0.00205098	TMEM106B/TMEM39A/SNX4/FEZ2/SH3GLB1/RAB5A/SCARB2/TBC1D12/MOAP1/PIKFYVE/SNX18/LAPTM4B/WIPI1/GRN	14
GO:0002262	myeloid cell homeostasis	30/1558	169/18903	4.90334e-05	0.00258833	0.00225047	CDK6/RB1/KITLG/PTBP3/CASP3/MFHAS1/SLC25A40/SP3/PIK3CB/B2M/IREB2/NF1/SMAP1/L3MBTL3/TMOD3/HIF1A/SMAD5/JAK2/LYN/ARID4A/SLC15A4/UFL1/LIPA/SLC7A11/ID2/ETS1/IKZF1/HSPA1B/CSF1/STAT1	30
GO:0002475	antigen processing and presentation via MHC class Ib	7/1558	14/18903	5.20836e-05	0.00269935	0.002347	B2M/AP3B1/HLA-G/TAP2/HLA-F/HLA-E/AZGP1	7
GO:0006047	UDP-N-acetylglucosamine metabolic process	7/1558	14/18903	5.20836e-05	0.00269935	0.002347	GNPDA2/UAP1/PGM3/GFPT1/GNE/GNPNAT1/SLC35A3	7
GO:0002697	regulation of immune effector process	54/1558	379/18903	5.28422e-05	0.00271399	0.00235973	DENND1B/UBE2J1/RASGRP1/ATG5/RIPK2/CYRIB/SNX4/SIRT1/CD47/VAMP7/B2M/AHR/DDX21/DNAJB9/RIF1/NDFIP1/APPL1/RC3H2/MALT1/ZBTB1/TLR3/LYN/PTPN22/XBP1/CD36/HLA-DMB/HLA-G/ACP5/BCL10/IRAK3/SLC15A4/CD84/CD55/TAP2/HLA-DRA/MYD88/HLA-B/IL1R1/FZD5/SOCS5/SASH3/CXCL6/TFRC/CD74/HLA-F/GRN/LACC1/CLEC7A/BATF/CD96/HLA-E/HLA-DRB1/AZGP1/WNT5A	54
GO:0000209	protein polyubiquitination	39/1558	246/18903	5.70985e-05	0.00288069	0.00250467	RBX1/ZNRF2/UBE2Q2/UBE2J1/UBE2D1/RNF217/UBE2K/UBE2W/FBXO28/CBFB/TNKS2/UBE2G1/UBE2B/ANKIB1/FBXL17/UBE2E1/MARCHF5/MARCHF7/BIRC2/ZFP91/BARD1/RNF19A/RC3H2/PLAA/CUL3/ANAPC13/NHLRC3/WWP1/PELI2/LNPEP/CDC27/PTPN22/UBE4A/SMURF2/DDX3X/RNF19B/RNF114/TRAF5/TRIM22	39
GO:0045930	negative regulation of mitotic cell cycle	39/1558	246/18903	5.70985e-05	0.00288069	0.00250467	CDKN1B/RB1/EZH2/CCNG1/BUB3/ZNF207/TAOK1/WAC/CDC73/RPL26/FZD3/DLG1/BTG1/BARD1/BTG3/RINT1/GEN1/CDK1/SPDL1/TRIAP1/HECA/ZNF655/NBN/MAD2L1/SDE2/YTHDC2/ATM/E2F7/ZWILCH/SLFN11/CTDSPL/GPNMB/CASP2/CDC20/CCNB1/CRLF3/CDT1/ZWINT/NABP1	39
GO:0010506	regulation of autophagy	50/1558	344/18903	5.90642e-05	0.00294659	0.00256197	UBQLN1/PRKAA1/PRKAA2/ATP6V1G1/EXOC8/ATG5/PLEKHF1/GNAI3/VPS26A/RIPK2/RRAGC/CASP3/TMEM39A/VPS13C/SNX4/SIRT1/WAC/FEZ2/SH3GLB1/PIK3CB/MAPK8/SCOC/MOAP1/FBXW7/ZMPSTE24/TAB2/MTMR9/SNX18/SNX6/HIF1A/TBK1/PIK3CA/ATG12/PTPN22/ATG14/DNM1L/IFI16/BNIP3L/SESN3/WIPI1/MET/UFL1/PIK3C2A/SVIP/DRAM1/ATM/DAPK2/MFSD8/FZD5/TRIM22	50
GO:2000514	regulation of CD4-positive, alpha-beta T cell activation	18/1558	79/18903	5.94383e-05	0.00294659	0.00256197	CD274/TWSG1/RIPK2/CBFB/TGFBR2/NDFIP1/RC3H2/MALT1/CD55/HLA-DRA/SOCS5/SASH3/VSIR/CD3E/BATF/HLA-DRB1/IL2RG/RUNX3	18
GO:0006997	nucleus organization	26/1558	139/18903	6.18709e-05	0.00304074	0.00264383	CHMP2B/AGFG1/SELENOF/REEP3/RRN3/SIRT1/PARP11/FAM118B/SEH1L/ZMPSTE24/CHMP1B/NUP54/CDK1/BIN1/CHMP3/LEMD3/ATXN7/PITPNB/SPAST/ACTR6/SUN2/NDC1/USPL1/TMEM170A/SRPK1/ETS1	26
GO:0043547	positive regulation of GTPase activity	43/1558	283/18903	6.79697e-05	0.00331193	0.00287962	DENND1B/CAV2/RASGRP1/EZH2/RAP1A/TBC1D4/ECT2/TBC1D15/ARAP2/TBC1D12/RAP1GDS1/RIC1/TBC1D9/NF1/ASAP2/SNX18/SOS2/ELMOD2/BIN1/ARHGEF16/ASAP1/RALGPS2/RAB11FIP2/RGS1/RAPGEF5/ARHGAP29/SNX13/PICALM/SIPA1L2/SH3BP1/TBC1D8B/RABGAP1L/GMIP/DOCK10/TBC1D10C/GRHL3/SEMA4D/RGS10/TGM2/TBC1D30/F2R/RAPGEF3/WNT5A	43
GO:0097494	regulation of vesicle size	8/1558	19/18903	6.91305e-05	0.00333994	0.00290397	RAB11A/BLOC1S1/RAB5A/BLOC1S2/RAB22A/CHMP3/PICALM/BORCS7	8
GO:0046635	positive regulation of alpha-beta T cell activation	17/1558	73/18903	7.06046e-05	0.0033825	0.00294097	RIPK2/CBFB/TGFBR2/MALT1/AP3B1/JAK2/PTPN22/CD55/HLA-DRA/ZAP70/SOCS5/SASH3/CD3E/HLA-E/HLA-DRB1/IL2RG/RUNX3	17
GO:0006040	amino sugar metabolic process	12/1558	41/18903	7.77654e-05	0.00368938	0.0032078	CMAS/GNPDA2/UAP1/PGM3/NPL/GFPT1/CHST2/GNE/ALDH1A1/GNPNAT1/SLC35A3/ST3GAL1	12
GO:0006893	Golgi to plasma membrane transport	15/1558	60/18903	7.83046e-05	0.00368938	0.0032078	VAMP3/EXOC8/RAB10/LYPLA1/GOLGA7/ARFGEF2/NSF/EXOC5/ACSL3/EXOC6/BLZF1/ATP2C1/STEAP2/VAMP5/AMN	15
GO:0032946	positive regulation of mononuclear cell proliferation	27/1558	149/18903	7.96602e-05	0.00372248	0.00323658	BMI1/KITLG/IL15/CD274/RIPK2/TGFBR2/SLC7A1/NCK1/JAK2/IL6ST/PTPN22/HLA-DMB/CD55/PPP3CA/MYD88/HLA-DPA1/ZAP70/SASH3/CSF1/CORO1A/TFRC/CD74/CD3E/HLA-E/IRS2/CD6/HLA-DPB1	27
GO:1903706	regulation of hemopoiesis	57/1558	413/18903	8.13089e-05	0.00376863	0.00327671	CDK6/RB1/PURB/RASGRP1/EIF6/KITLG/CREB1/IL15/RIPK2/CBFB/TGFBR2/CDC73/B2M/CTNNBIP1/LOX/FBXW7/TMEM64/NDFIP1/NF1/RC3H2/MYSM1/SMAP1/SMARCE1/SOS2/MALT1/ZBTB1/HIF1A/AP3B1/TLR3/LYN/XBP1/HLA-G/GABPA/CD2/HLA-DRA/PPP3CA/HLA-B/ID2/IRF1/ETS1/IL15RA/PRDM1/ZAP70/SOCS5/SASH3/TMEM131L/HSPA1B/CSF1/STAT1/ARID2/VSIR/CD74/BATF/HLA-DRB1/IL2RG/RUNX3/HLA-DOA	57
GO:0071346	cellular response to interferon-gamma	23/1558	118/18903	8.37277e-05	0.00384945	0.00334698	VAMP3/CD58/CD47/KIF5B/IFNGR1/STXBP3/PDE12/JAK2/TLR3/SYNCRIP/ACTR2/ZYX/ACTR3/HLA-DPA1/IRF1/IFNGR2/CDC42EP2/STAT1/TLR2/NLRC5/GBP2/GBP4/WNT5A	23
GO:0002381	immunoglobulin production involved in immunoglobulin-mediated immune response	17/1558	74/18903	8.47088e-05	0.0038634	0.00335911	B2M/RIF1/NDFIP1/HLA-DQA1/HLA-DMA/HLA-DMB/SLC15A4/NBN/HLA-DRB5/HLA-DRA/HLA-DPA1/HLA-DQB1/TFRC/BATF/HLA-DRB1/HLA-DOA/HLA-DPB1	17
GO:0060576	intestinal epithelial cell development	7/1558	15/18903	9.07035e-05	0.00410397	0.00356828	C1GALT1/SPDEF/HIF1A/IL6ST/KLF5/PRDM1/FZD5	7
GO:0002699	positive regulation of immune effector process	40/1558	261/18903	9.91672e-05	0.00444387	0.00386381	DENND1B/RASGRP1/RIPK2/CYRIB/SNX4/SIRT1/VAMP7/B2M/DDX21/DNAJB9/RIF1/MALT1/ZBTB1/TLR3/LYN/PTPN22/XBP1/CD36/HLA-DMB/HLA-G/BCL10/CD84/CD55/TAP2/HLA-DRA/MYD88/HLA-B/IL1R1/FZD5/SOCS5/SASH3/TFRC/CD74/HLA-F/LACC1/CLEC7A/HLA-E/HLA-DRB1/AZGP1/WNT5A	40
GO:0046349	amino sugar biosynthetic process	6/1558	11/18903	9.97746e-05	0.00444387	0.00386381	GNPDA2/UAP1/PGM3/GFPT1/GNE/GNPNAT1	6
GO:0030099	myeloid cell differentiation	56/1558	407/18903	0.000101609	0.00449047	0.00390432	CDK6/RB1/PURB/EIF6/KITLG/CREB1/IL15/PTBP3/CBFB/CASP3/MFHAS1/TGFBR2/SIRT1/SLC25A40/CDC73/SP3/B2M/CTNNBIP1/OSTM1/ITGB8/LOX/FBXW7/IREB2/TMEM64/LBR/NDFIP1/NF1/SMAP1/TET2/RBPJ/L3MBTL3/TMOD3/HIF1A/SMAD5/AP3B1/JAK2/TLR3/LYN/IFI16/ARID4A/GABPA/UFL1/PPP3CA/ID2/ETS1/TCIRG1/IKZF1/HSPA1B/CSF1/STAT1/BATF2/TLR2/TFRC/CD74/BATF/HLA-DRB1	56
GO:0036503	ERAD pathway	22/1558	112/18903	0.000105086	0.00460844	0.00400689	UBQLN1/UBE2J1/DNAJB14/RNF139/DERL1/STT3B/UBXN4/YOD1/DNAJB9/MAN1A1/RNF103/SEL1L/USP14/EDEM3/HERPUD1/XBP1/UBE4A/RNFT1/USP25/SVIP/JKAMP/UGGT2	22
GO:0002643	regulation of tolerance induction	8/1558	20/18903	0.000106909	0.00465256	0.00404526	CD274/TGFBR2/MARCHF7/HLA-G/IRAK3/HLA-B/IDO1/CD3E	8
GO:0140029	exocytic process	18/1558	83/18903	0.000117577	0.00507809	0.00441524	VAMP3/EXOC8/RAB8B/RAB10/YKT6/SNX4/VAMP7/RAB12/EXOC5/BLOC1S6/STXBP3/SNAP23/STX3/EXOC6/LYN/STXBP5/SYNJ1/PPFIA3	18
GO:0002274	myeloid leukocyte activation	37/1558	237/18903	0.000120953	0.00518461	0.00450785	RORA/RASGRP1/IL15/PLPP6/S100A13/MFHAS1/TGFBR2/SNX4/VAMP7/ADAM9/ITGB8/ADAM10/IFNGR1/STXBP3/RBPJ/PJA2/SNAP23/CTSC/JAK2/TLR3/LYN/CD84/PLA2G4A/CD2/CRTC3/MYD88/ATM/STK39/IFNGR2/CSF1/CXCL6/BATF2/TLR2/CD74/GRN/BATF/WNT5A	37
GO:0001916	positive regulation of T cell mediated cytotoxicity	10/1558	31/18903	0.000124373	0.00525224	0.00456666	CYRIB/B2M/HLA-G/TAP2/HLA-DRA/HLA-B/HLA-F/HLA-E/HLA-DRB1/AZGP1	10
GO:0002507	tolerance induction	10/1558	31/18903	0.000124373	0.00525224	0.00456666	CD274/TGFBR2/MARCHF7/LYN/HLA-G/IRAK3/HLA-B/IDO1/CD3E/HLA-E	10
GO:0090148	membrane fission	12/1558	43/18903	0.000129383	0.00542362	0.00471567	CHMP2B/EXOC8/SLC25A46/SH3GLB1/VPS37A/EXOC5/CHMP1B/EXOC6/CHMP3/VPS37B/DNM1L/SPAST	12
GO:0010934	macrophage cytokine production	11/1558	37/18903	0.000131743	0.00544252	0.0047321	UBE2J1/RIPK2/SIRT1/TLR3/CD36/HLA-G/ACP5/IRAK3/MYD88/CD74/WNT5A	11
GO:0010935	regulation of macrophage cytokine production	11/1558	37/18903	0.000131743	0.00544252	0.0047321	UBE2J1/RIPK2/SIRT1/TLR3/CD36/HLA-G/ACP5/IRAK3/MYD88/CD74/WNT5A	11
GO:0030968	endoplasmic reticulum unfolded protein response	17/1558	77/18903	0.000142942	0.00581634	0.00505713	EIF2AK3/DERL1/AGR2/YOD1/SERP1/TMED2/TMEM33/DNAJB9/EIF2S1/NCK1/CREB3L1/HERPUD1/XBP1/CREBZF/UFL1/ERO1A/CREB3L4	17
GO:0034121	regulation of toll-like receptor signaling pathway	17/1558	77/18903	0.000142942	0.00581634	0.00505713	UBQLN1/WDFY1/MFHAS1/BIRC2/APPL1/PJA2/TLR3/LYN/PTPN22/CD36/IRAK3/BIRC3/SLC15A4/DDX3X/IRF1/BPIFB1/TLR2	17
GO:0050671	positive regulation of lymphocyte proliferation	26/1558	146/18903	0.000143853	0.00581634	0.00505713	BMI1/KITLG/IL15/CD274/RIPK2/TGFBR2/SLC7A1/NCK1/JAK2/IL6ST/PTPN22/HLA-DMB/CD55/PPP3CA/MYD88/HLA-DPA1/ZAP70/SASH3/CORO1A/TFRC/CD74/CD3E/HLA-E/IRS2/CD6/HLA-DPB1	26
GO:0051648	vesicle localization	34/1558	213/18903	0.000144873	0.00581634	0.00505713	WASL/AP1AR/RAB27A/RASGRP1/EXOC8/RAB11A/TRAPPC13/BLOC1S1/YKT6/PPP6C/BLOC1S2/TFG/RAB1A/TMED2/ARFGAP3/SAR1A/TRAPPC6B/KIF5B/TBC1D23/EXOC5/BLOC1S6/AP3M1/CUL3/SNAP23/EXOC6/AP3B1/FAM91A1/CCDC186/WIPI1/SYNJ1/ITGA4/PICALM/TCIRG1/SDCBP	34
GO:0044346	fibroblast apoptotic process	9/1558	26/18903	0.000147159	0.00586682	0.00510102	IER3IP1/CASP3/BTG1/STK17B/CUL3/PIK3CA/CASP7/BID/STK17A	9
GO:0061082	myeloid leukocyte cytokine production	13/1558	50/18903	0.000151152	0.00595059	0.00517385	UBE2J1/RIPK2/SIRT1/DDX21/TLR3/CD36/HLA-G/ACP5/BCL10/IRAK3/MYD88/CD74/WNT5A	13
GO:0062207	regulation of pattern recognition receptor signaling pathway	21/1558	107/18903	0.000151348	0.00595059	0.00517385	UBQLN1/WDFY1/MFHAS1/BIRC2/RIOK3/APPL1/PJA2/USP15/TLR3/LYN/PTPN22/CD36/IRAK3/BIRC3/SLC15A4/DDX3X/IRF1/BPIFB1/HSPA1B/TLR2/SLC15A2	21
GO:0002449	lymphocyte mediated immunity	51/1558	367/18903	0.00015883	0.00620197	0.00539242	DENND1B/RAB27A/RASGRP1/CYRIB/ARL8B/VAMP7/B2M/AHR/KIF5B/RIF1/NDFIP1/HPRT1/MALT1/ZBTB1/CTSC/HLA-DQA1/HLA-DMA/HLA-DMB/HLA-G/BCL10/SLC15A4/NBN/CD55/HLA-DRB5/TAP2/CD2/HLA-DRA/MYD88/HLA-B/RNF19B/TRBC2/IL1R1/HLA-DPA1/HLA-DQB1/FZD5/TCIRG1/C2/RFTN1/SASH3/CD8A/CORO1A/TFRC/CD74/HLA-F/BATF/CD96/HLA-E/HLA-DRB1/HLA-DOA/AZGP1/HLA-DPB1	51
GO:0045786	negative regulation of cell cycle	55/1558	405/18903	0.000164636	0.00634868	0.00551998	CDK6/CDKN1B/RB1/FEM1B/EZH2/CCNG1/BUB3/KAT2B/ZNF207/TAOK1/CASP3/CLOCK/SIRT1/WAC/CDC73/RPL26/FZD3/DLG1/BTG1/BARD1/BTG3/LATS2/RINT1/GEN1/CDK1/SPDL1/TRIAP1/HECA/ZNF655/HLA-G/NBN/MAD2L1/MCIDAS/TIPRL/SDE2/YTHDC2/ATM/E2F7/THAP5/ZWILCH/SLFN11/CTDSPL/GPNMB/CASP2/CDC20/ETAA1/CCNB1/NEK2/CRLF3/CDT1/RUNX3/ZWINT/NABP1/HPGD/NKX3-1	55
GO:0034620	cellular response to unfolded protein	20/1558	100/18903	0.000164814	0.00634868	0.00551998	EIF2AK3/HSPA13/HSPA14/DERL1/AGR2/YOD1/SERP1/TMED2/TMEM33/DNAJB9/EIF2S1/NCK1/CREB3L1/HERPUD1/XBP1/CREBZF/UFL1/ERO1A/CREB3L4/HSPA1B	20
GO:0002443	leukocyte mediated immunity	61/1558	463/18903	0.000174844	0.00668984	0.00581661	DENND1B/RAB27A/RASGRP1/S100A13/CYRIB/SNX4/ARL8B/VAMP7/B2M/AHR/DDX21/KIF5B/RIF1/NDFIP1/STXBP3/HPRT1/SNAP23/MALT1/ZBTB1/CTSC/HLA-DQA1/TLR3/LYN/HLA-DMA/HLA-DMB/HLA-G/BCL10/SLC15A4/CD84/NBN/CD55/HLA-DRB5/TAP2/CD2/HLA-DRA/MYD88/HLA-B/RNF19B/TRBC2/IL1R1/HLA-DPA1/HLA-DQB1/FZD5/TCIRG1/C2/RFTN1/SASH3/CXCL6/CD8A/CORO1A/TFRC/CD74/HLA-F/CLEC7A/BATF/CD96/HLA-E/HLA-DRB1/HLA-DOA/AZGP1/HLA-DPB1	61
GO:0002645	positive regulation of tolerance induction	6/1558	12/18903	0.000185612	0.00705451	0.00613368	CD274/TGFBR2/HLA-G/IRAK3/IDO1/CD3E	6
GO:0001913	T cell mediated cytotoxicity	13/1558	51/18903	0.000187716	0.00708723	0.00616213	RAB27A/CYRIB/B2M/HPRT1/CTSC/HLA-G/TAP2/HLA-DRA/HLA-B/HLA-F/HLA-E/HLA-DRB1/AZGP1	13
GO:0051056	regulation of small GTPase mediated signal transduction	44/1558	305/18903	0.000189361	0.0071023	0.00617523	ARHGAP20/CDC42SE2/GNA13/KRAS/LPAR6/RASGRP1/KITLG/CYRIB/ITGAV/ARHGDIB/ECT2/ARFGEF2/PIK3CB/RASA2/FAM13B/LPAR1/LRRC59/ARHGEF3/SHOC2/NF1/FBP1/ARHGAP12/SOS2/CD2AP/CUL3/RALGPS2/ARHGAP29/MET/SIPA1L2/EPS8L3/DENND4A/SH3BP1/SSX2IP/GMIP/RHOF/ARHGAP30/FGD4/CSF1/RHOU/ARHGAP5/TGM2/F2R/ARHGEF1/ABCA1	44
GO:0030217	T cell differentiation	43/1558	296/18903	0.000190698	0.0071057	0.00617818	CDK6/RORA/BMI1/RASGRP1/ATG5/IL15/RIPK2/CBFB/TGFBR2/SP3/B2M/ATP7A/RC3H2/SMARCE1/SOS2/MALT1/ZBTB1/AP3B1/PTPN22/XBP1/HLA-G/CD2/HLA-DRA/LCK/IRF1/PRDM1/FZD5/TCIRG1/ZAP70/SOCS5/SASH3/TMEM131L/CD3D/CD8A/ARID2/VSIR/CD74/CD3E/BATF/HLA-DRB1/IL2RG/RUNX3/HLA-DOA	43
GO:0002822	regulation of adaptive immune response based on somatic recombination of immune receptors built from immunoglobulin superfamily domains	30/1558	182/18903	0.000195685	0.00724414	0.00629856	DENND1B/CD274/RIPK2/CYRIB/B2M/AHR/RIF1/NDFIP1/RC3H2/MALT1/ZBTB1/JAK2/HLA-G/SLC15A4/CD55/PLA2G4A/TAP2/HLA-DRA/HLA-B/IL1R1/FZD5/SOCS5/SASH3/TFRC/HLA-F/CLEC7A/BATF/HLA-E/HLA-DRB1/AZGP1	30
GO:0007265	Ras protein signal transduction	49/1558	353/18903	0.000217303	0.00799253	0.00694925	RAP2C/CDC42SE2/GNA13/RB1/RAB33B/KRAS/LPAR6/RASGRP1/KITLG/RAP1A/RAP2A/RAB9A/ARHGDIB/ARFGEF2/NRAS/PIK3CB/RASA2/NCKAP1/LPAR1/RALA/RAB12/LRRC59/RAB21/ARHGEF3/SHOC2/RIT1/RASSF1/NF1/FBP1/SOS2/CUL3/G3BP2/RALGPS2/RAPGEF5/ARHGAP29/MET/EPS8L3/DENND4A/SH3BP1/SSX2IP/CDC42EP2/CSF1/RHOU/SDCBP/ARHGAP5/F2R/RAPGEF3/ARHGEF1/ABCA1	49
GO:0031334	positive regulation of protein-containing complex assembly	31/1558	192/18903	0.000226247	0.00826817	0.00718891	CDKN1B/ARPC2/RHOC/RICTOR/SH3GLB1/FNIP2/DLG1/NCKAP1/CAND1/CRBN/NEK7/FNIP1/NCK1/BIN1/ASAP1/STMP1/FCHSD2/CD36/BID/MPP7/MET/DDX3X/MYD88/ATM/CDC42EP2/HSPA1B/TFRC/WARS1/CLEC7A/CDT1/ABCA1	31
GO:1902105	regulation of leukocyte differentiation	45/1558	317/18903	0.000233116	0.00843126	0.00733072	CDK6/RB1/RASGRP1/KITLG/CREB1/IL15/RIPK2/CBFB/TGFBR2/CTNNBIP1/FBXW7/TMEM64/NDFIP1/NF1/RC3H2/SMARCE1/SOS2/MALT1/ZBTB1/AP3B1/TLR3/LYN/XBP1/HLA-G/CD2/HLA-DRA/PPP3CA/HLA-B/ID2/IRF1/IL15RA/PRDM1/ZAP70/SOCS5/SASH3/TMEM131L/CSF1/ARID2/VSIR/CD74/BATF/HLA-DRB1/IL2RG/RUNX3/HLA-DOA	45
GO:0070665	positive regulation of leukocyte proliferation	28/1558	167/18903	0.000235391	0.00843126	0.00733072	BMI1/KITLG/IL15/CD274/RIPK2/TGFBR2/SLC7A1/NCK1/JAK2/IL6ST/LYN/PTPN22/HLA-DMB/CD55/PPP3CA/MYD88/HLA-DPA1/ZAP70/SASH3/CSF1/CORO1A/TFRC/CD74/CD3E/HLA-E/IRS2/CD6/HLA-DPB1	28
GO:0002683	negative regulation of immune system process	59/1558	449/18903	0.000237762	0.00843126	0.00733072	CDK6/PSMA1/WASL/CD200R1/ATG5/KITLG/CD274/TWSG1/YTHDF3/PAWR/CBFB/CASP3/LRCH1/CD47/AHR/MARCHF7/PAG1/DLG1/FBXW7/NDFIP1/NF1/APPL1/RC3H2/USP15/TLR3/ATG12/LYN/YES1/PTPN22/IFI16/HLA-G/ACP5/LPXN/IRAK3/CD84/CD55/NLRC3/ATM/HLA-B/IDO1/ID2/IRF1/TAPBPL/GPNMB/TBC1D10C/SOCS5/TMEM131L/BANK1/VSIR/CD74/NLRC5/HLA-F/GRN/CD96/HLA-E/HLA-DRB1/ADTRP/RUNX3/HLA-DOA	59
GO:1902107	positive regulation of leukocyte differentiation	30/1558	184/18903	0.000238104	0.00843126	0.00733072	RB1/RASGRP1/KITLG/CREB1/IL15/RIPK2/CBFB/TGFBR2/CTNNBIP1/TMEM64/SMARCE1/MALT1/ZBTB1/AP3B1/XBP1/HLA-G/HLA-DRA/PPP3CA/ID2/IL15RA/ZAP70/SOCS5/SASH3/CSF1/ARID2/VSIR/CD74/HLA-DRB1/IL2RG/RUNX3	30
GO:1903708	positive regulation of hemopoiesis	30/1558	184/18903	0.000238104	0.00843126	0.00733072	RB1/RASGRP1/KITLG/CREB1/IL15/RIPK2/CBFB/TGFBR2/CTNNBIP1/TMEM64/SMARCE1/MALT1/ZBTB1/AP3B1/XBP1/HLA-G/HLA-DRA/PPP3CA/ID2/IL15RA/ZAP70/SOCS5/SASH3/CSF1/ARID2/VSIR/CD74/HLA-DRB1/IL2RG/RUNX3	30
GO:2001233	regulation of apoptotic signaling pathway	51/1558	374/18903	0.000253045	0.008905	0.00774262	CAAP1/UBQLN1/EIF2AK3/RB1/BMI1/SGMS1/FEM1B/PLEKHF1/CYLD/GNAI3/TGFBR1/GHITM/BIRC6/RRN3/ITGAV/SIRT1/PHIP/PIK3CB/RPL26/MARCHF7/FBXW7/NF1/OPA1/NCK1/HIF1A/CTSC/CREB3L1/TRIAP1/JAK2/HERPUD1/HELLS/XBP1/BID/DNM1L/SKIL/BCL10/TNFSF10/DDX3X/TMC8/BMPR1B/STK3/LCK/DAPK2/TPD52L1/CASP2/HSPA1B/CD74/IVNS1ABP/NKX3-1/DEPTOR/FAS	51
GO:0055076	transition metal ion homeostasis	25/1558	143/18903	0.000257462	0.00900486	0.00782945	SLC39A8/ATP6V1G1/SLC30A1/SLC30A7/B2M/TMEM199/IREB2/NDFIP1/ATP7A/SLC30A6/HIF1A/SLC30A9/AP3B1/SLC39A14/FBXL5/TMC8/PICALM/STEAP4/LCK/SLC25A28/SLC31A2/SLC40A1/STEAP2/SLC31A1/TFRC	25
GO:0002460	adaptive immune response based on somatic recombination of immune receptors built from immunoglobulin superfamily domains	51/1558	375/18903	0.00027	0.00938579	0.00816065	DENND1B/RORA/RAB27A/CD274/RIPK2/CYRIB/B2M/AHR/RIF1/NDFIP1/RC3H2/HPRT1/MALT1/ZBTB1/CTSC/HLA-DQA1/JAK2/HLA-DMA/HLA-DMB/HLA-G/BCL10/SLC15A4/NBN/CD55/PLA2G4A/HLA-DRB5/TAP2/HLA-DRA/MYD88/HLA-B/TRBC2/IL1R1/HLA-DPA1/HLA-DQB1/FZD5/TCIRG1/C2/SOCS5/RFTN1/SASH3/CD8A/TFRC/CD74/HLA-F/CLEC7A/BATF/HLA-E/HLA-DRB1/HLA-DOA/AZGP1/HLA-DPB1	51
GO:0000266	mitochondrial fission	11/1558	40/18903	0.000283	0.00977808	0.00850174	SLC25A46/CYRIB/MARCHF5/RALA/MTFR1/DDHD1/OPA1/AP3B1/MCU/DNM1L/TMEM135	11
GO:0000041	transition metal ion transport	20/1558	104/18903	0.000286027	0.00982313	0.0085409	SLC39A8/SLC30A1/SLC30A7/PGRMC2/B2M/TMEM165/IREB2/MMGT1/ATP7A/SLC30A6/SLC30A9/SLC39A14/ATP2C1/STEAP4/SLC25A28/SLC31A2/SLC40A1/STEAP2/SLC31A1/TFRC	20
GO:0061081	positive regulation of myeloid leukocyte cytokine production involved in immune response	10/1558	34/18903	0.000292613	0.00998913	0.00868524	RIPK2/SIRT1/DDX21/TLR3/CD36/HLA-G/BCL10/MYD88/CD74/WNT5A	10
GO:0002709	regulation of T cell mediated immunity	18/1558	89/18903	0.000297085	0.0100814	0.0087655	DENND1B/CYRIB/B2M/AHR/MALT1/ZBTB1/HLA-G/CD55/TAP2/HLA-DRA/HLA-B/IL1R1/FZD5/SASH3/HLA-F/HLA-E/HLA-DRB1/AZGP1	18
GO:0051036	regulation of endosome size	6/1558	13/18903	0.000320674	0.0107539	0.00935017	RAB11A/BLOC1S1/RAB5A/BLOC1S2/CHMP3/BORCS7	6
GO:0070424	regulation of nucleotide-binding oligomerization domain containing signaling pathway	6/1558	13/18903	0.000320674	0.0107539	0.00935017	BIRC2/PTPN22/BIRC3/SLC15A4/HSPA1B/SLC15A2	6
GO:0034314	Arp2/3 complex-mediated actin nucleation	12/1558	47/18903	0.000323715	0.0107924	0.00938364	WASL/AP1AR/GMFB/ARPC2/NCKAP1/ARFIP1/WASHC4/ARPC5/FCHSD2/JMY/ACTR2/ACTR3	12
GO:0035739	CD4-positive, alpha-beta T cell proliferation	8/1558	23/18903	0.000332603	0.0109605	0.00952982	CD274/TWSG1/RIPK2/TGFBR2/NDFIP1/CD55/VSIR/CD3E	8
GO:2000561	regulation of CD4-positive, alpha-beta T cell proliferation	8/1558	23/18903	0.000332603	0.0109605	0.00952982	CD274/TWSG1/RIPK2/TGFBR2/NDFIP1/CD55/VSIR/CD3E	8
GO:0045580	regulation of T cell differentiation	29/1558	179/18903	0.000334544	0.0109611	0.00953036	RASGRP1/IL15/RIPK2/CBFB/TGFBR2/RC3H2/SMARCE1/SOS2/MALT1/ZBTB1/AP3B1/XBP1/HLA-G/CD2/HLA-DRA/IRF1/PRDM1/ZAP70/SOCS5/SASH3/TMEM131L/ARID2/VSIR/CD74/BATF/HLA-DRB1/IL2RG/RUNX3/HLA-DOA	29
GO:0046854	phosphatidylinositol phosphate biosynthetic process	15/1558	68/18903	0.000349242	0.0113773	0.00989222	PI4K2B/HYCC2/BPNT2/IMPA1/EFR3A/PIK3CB/PIKFYVE/SOCS4/PIK3CA/ATG14/SYNJ1/PIK3C2A/ATM/HYCC1/SOCS5	15
GO:0071786	endoplasmic reticulum tubular network organization	7/1558	18/18903	0.000359633	0.0115834	0.0100714	REEP3/RAB10/RAB18/ARL6IP1/TMEM33/ATL2/TMEM170A	7
GO:1903830	magnesium ion transmembrane transport	7/1558	18/18903	0.000359633	0.0115834	0.0100714	MAGT1/NIPA2/MMGT1/SLC41A2/MRS2/ZDHHC17/NIPAL2	7
GO:0042176	regulation of protein catabolic process	49/1558	361/18903	0.000368897	0.0118151	0.0102728	RBX1/UBQLN1/CDKN1B/FAM83D/RNF217/UBE2K/RCHY1/FMR1/ANKIB1/WAC/MARCHF7/ADAM9/STYX/MYCBP2/NSF/UCHL5/RIC1/FBXW7/BARD1/RNF19A/NDFIP1/UBR3/SOCS4/USP14/LAPTM4B/TMTC3/HERPUD1/IDE/RNFT1/USP25/IRAK3/RHBDF1/XPO1/MAD2L1/FBXL5/UFL1/SVIP/RNF19B/FBXO11/RYBP/MFSD8/SOCS5/HSPA1B/CDC20/SDCBP/MYLIP/ODC1/WNT5A/CDC20B	49
GO:0032984	protein-containing complex disassembly	36/1558	242/18903	0.000387573	0.012279	0.0106762	CHMP2B/UBQLN1/ASPH/MTPN/ATG5/CAPZA2/TAOK1/TMEM39A/LAMP2/KIF5B/NSF/ZMPSTE24/CAPZA1/VTA1/CHMP1B/TWF2/SMARCE1/GSPT1/TMOD3/CAMSAP2/CHMP3/PIK3CA/ATXN7/ATG12/ATG14/SPAST/IRAK3/SYNJ1/MICAL2/SH3BP1/CFL2/CKAP2/ABCE1/MFSD8/ARID2/PLEKHH2	36
GO:2001242	regulation of intrinsic apoptotic signaling pathway	28/1558	172/18903	0.000387689	0.012279	0.0106762	UBQLN1/EIF2AK3/SGMS1/PLEKHF1/CYLD/RRN3/SIRT1/PIK3CB/RPL26/MARCHF7/FBXW7/OPA1/NCK1/HIF1A/CREB3L1/TRIAP1/HERPUD1/HELLS/XBP1/BID/DNM1L/SKIL/DDX3X/LCK/DAPK2/CD74/IVNS1ABP/NKX3-1	28
GO:0090150	establishment of protein localization to membrane	39/1558	270/18903	0.000415623	0.013091	0.0113822	SRP19/ZDHHC21/TRAM1/VAMP3/RAB8B/RAB10/LYPLA1/RAB11A/WDR83OS/SSR1/GOLGA7/SEC61G/GORASP2/ARL6IP1/MAPK8/MOAP1/MAIP1/VPS37A/NSF/PIKFYVE/MMGT1/ATP1B1/SEC62/ACSL3/ZDHHC20/STX3/VPS37B/AP3B1/BLZF1/CHM/BID/ATAD1/SRP9/ATP2C1/SRP72/RFTN1/SDCBP/VAMP5/AMN	39
GO:0035710	CD4-positive, alpha-beta T cell activation	21/1558	115/18903	0.000426068	0.0133462	0.0116041	RORA/CD274/TWSG1/RIPK2/CBFB/TGFBR2/NDFIP1/ATP7A/RC3H2/MALT1/CD55/HLA-DRA/TCIRG1/SOCS5/SASH3/VSIR/CD3E/BATF/HLA-DRB1/IL2RG/RUNX3	21
GO:0007030	Golgi organization	27/1558	165/18903	0.000448987	0.0139308	0.0121124	PI4K2B/RAB2A/TMED7/TMED3/TMED5/RAB33B/VCPIP1/ARL1/BET1/VAMP4/EHD3/ATP8B1/LYSMD3/GORASP2/COG3/SURF4/RAB1A/TMED2/GOLGA5/COG5/LMAN1/YIPF5/CDK1/CAMSAP2/PDCD10/BLZF1/ATL2	27
GO:0006623	protein targeting to vacuole	11/1558	42/18903	0.000449618	0.0139308	0.0121124	VPS13C/SCARB2/LAMP2/VPS37A/AP3M1/VPS13A/SNX16/VPS37B/AP3B1/ATG14/GNPTAB	11
GO:0032729	positive regulation of interferon-gamma production	16/1558	77/18903	0.000460276	0.014184	0.0123325	RASGRP1/PDE4D/RIPK2/CYRIB/JAK2/TLR3/PTPN22/CD2/IL1R1/HLA-DPA1/FZD5/SASH3/CD3E/CLEC7A/WNT5A/HLA-DPB1	16
GO:0060907	positive regulation of macrophage cytokine production	8/1558	24/18903	0.000463086	0.0141938	0.0123411	RIPK2/SIRT1/TLR3/CD36/HLA-G/MYD88/CD74/WNT5A	8
GO:0032006	regulation of TOR signaling	20/1558	108/18903	0.000478907	0.0145432	0.0126449	FAM83D/PRKAA1/PRKAA2/RRAGC/RICTOR/LAMTOR3/SIRT1/WAC/BMT2/LAMTOR5/SEH1L/ZMPSTE24/FNIP1/HIF1A/PIK3CA/GPAT3/SESN3/ATM/BMAL1/DEPTOR	20
GO:0043543	protein acylation	39/1558	272/18903	0.000482137	0.0145432	0.0126449	ZDHHC21/DR1/BMI1/PRKAA1/PRKAA2/EID1/ATG5/KAT2B/TAOK1/BLOC1S1/PPM1B/CLOCK/GOLGA7/SIRT1/DDX21/NAA30/NCOA3/DLD/ZMPSTE24/PPM1A/DEK/NAA50/TAF2/ZDHHC20/YEATS4/SF3B1/PHF20L1/MBIP/ZDHHC17/ATXN7/MLLT3/SMC5/MBTD1/DDX3X/NAA16/BMAL1/SDR16C5/ESCO1/RAPGEF3	39
GO:1901988	negative regulation of cell cycle phase transition	39/1558	272/18903	0.000482137	0.0145432	0.0126449	CDKN1B/RB1/FEM1B/EZH2/CCNG1/BUB3/ZNF207/TAOK1/CLOCK/WAC/CDC73/RPL26/DLG1/BARD1/RINT1/GEN1/CDK1/SPDL1/TRIAP1/ZNF655/NBN/MAD2L1/TIPRL/SDE2/ATM/E2F7/ZWILCH/SLFN11/CTDSPL/GPNMB/CASP2/CDC20/ETAA1/CCNB1/CRLF3/CDT1/ZWINT/NABP1/NKX3-1	39
GO:0002573	myeloid leukocyte differentiation	33/1558	218/18903	0.000484815	0.014547	0.0126482	CDK6/RB1/KITLG/CREB1/IL15/TGFBR2/SIRT1/SP3/CTNNBIP1/OSTM1/ITGB8/FBXW7/IREB2/TMEM64/LBR/NDFIP1/NF1/RBPJ/L3MBTL3/AP3B1/TLR3/LYN/IFI16/PPP3CA/ID2/TCIRG1/CSF1/BATF2/TLR2/TFRC/CD74/BATF/HLA-DRB1	33
GO:0051250	negative regulation of lymphocyte activation	27/1558	166/18903	0.000494963	0.0147737	0.0128453	CD274/TWSG1/PAWR/CBFB/CASP3/MARCHF7/PAG1/DLG1/NDFIP1/RC3H2/LYN/PTPN22/HLA-G/ATM/IDO1/ID2/IRF1/GPNMB/TBC1D10C/SOCS5/TMEM131L/BANK1/VSIR/CD74/HLA-F/HLA-DRB1/RUNX3	27
GO:0032757	positive regulation of interleukin-8 production	14/1558	63/18903	0.000502528	0.0149214	0.0129737	CD58/RAB1A/LAMTOR5/F3/TLR3/BCL10/CD2/MYD88/HSPA1B/TLR2/CD74/F2R/CLEC7A/WNT5A	14
GO:0007093	mitotic cell cycle checkpoint signaling	24/1558	141/18903	0.000507899	0.0149698	0.0130158	CDKN1B/CCNG1/BUB3/ZNF207/TAOK1/WAC/RPL26/BARD1/RINT1/GEN1/CDK1/SPDL1/TRIAP1/NBN/MAD2L1/SDE2/ATM/ZWILCH/CASP2/CDC20/CCNB1/CDT1/ZWINT/NABP1	24
GO:0019058	viral life cycle	44/1558	319/18903	0.00050941	0.0149698	0.0130158	CHMP2B/CAV2/ATG5/FMR1/ITGAV/TMEM39A/SLC7A1/ARL8B/EPS15/SCARB2/RAB1A/LAMTOR5/VPS37A/PKN2/PIKFYVE/DEK/VTA1/CHMP1B/PDE12/CXCR6/CDK1/CHMP3/VPS37B/WWP1/RESF1/ZNF639/IDE/IFI16/CD55/CXADR/DDX3X/IFIT5/YTHDC2/SMPD1/SRPK1/CCR5/ITGB7/TRIM22/SERPINB3/HSPA1B/TRIM31/TFRC/CD74/HLA-DRB1	44
GO:0042147	retrograde transport, endosome to Golgi	18/1558	93/18903	0.00052074	0.0151497	0.0131722	GOLT1B/VAMP3/ARL1/VPS26A/TMEM87B/EHD3/RAB9A/YKT6/TMEM87A/VPS29/RIC1/PIKFYVE/TBC1D23/ARFIP1/SNX6/VPS54/RHOBTB3/TBC1D10C	18
GO:0045619	regulation of lymphocyte differentiation	32/1558	210/18903	0.000520846	0.0151497	0.0131722	RASGRP1/IL15/RIPK2/CBFB/TGFBR2/NDFIP1/RC3H2/SMARCE1/SOS2/MALT1/ZBTB1/AP3B1/XBP1/HLA-G/CD2/HLA-DRA/ID2/IRF1/IL15RA/PRDM1/ZAP70/SOCS5/SASH3/TMEM131L/ARID2/VSIR/CD74/BATF/HLA-DRB1/IL2RG/RUNX3/HLA-DOA	32
GO:0015693	magnesium ion transport	7/1558	19/18903	0.000529093	0.0152341	0.0132456	MAGT1/NIPA2/MMGT1/SLC41A2/MRS2/ZDHHC17/NIPAL2	7
GO:2001185	regulation of CD8-positive, alpha-beta T cell activation	7/1558	19/18903	0.000529093	0.0152341	0.0132456	CD274/CBFB/PTPN22/IRF1/VSIR/HLA-E/RUNX3	7
GO:0008608	attachment of spindle microtubules to kinetochore	11/1558	43/18903	0.000559698	0.0160344	0.0139414	RB1/BUB3/KAT2B/ZNF207/ECT2/SEH1L/EML4/ABRAXAS2/CCNB1/NEK2/CDT1	11
GO:0002066	columnar/cuboidal epithelial cell development	12/1558	50/18903	0.000597039	0.016958	0.0147444	CDK6/C1GALT1/CLOCK/SPDEF/HIF1A/IL6ST/KLF5/RARB/BMAL1/PRDM1/FZD5/WNT5A	12
GO:0061136	regulation of proteasomal protein catabolic process	30/1558	194/18903	0.000597887	0.016958	0.0147444	RBX1/UBQLN1/RNF217/UBE2K/RCHY1/FMR1/ANKIB1/WAC/MARCHF7/STYX/UCHL5/FBXW7/RNF19A/SOCS4/USP14/TMTC3/HERPUD1/RNFT1/USP25/RHBDF1/XPO1/UFL1/SVIP/RNF19B/RYBP/SOCS5/HSPA1B/CDC20/SDCBP/CDC20B	30
GO:0032816	positive regulation of natural killer cell activation	8/1558	25/18903	0.000632174	0.0176668	0.0153607	RASGRP1/IL15/BLOC1S6/ZBTB1/JAK2/IL15RA/HLA-F/HLA-E	8
GO:0046641	positive regulation of alpha-beta T cell proliferation	8/1558	25/18903	0.000632174	0.0176668	0.0153607	RIPK2/TGFBR2/JAK2/PTPN22/CD55/ZAP70/CD3E/HLA-E	8
GO:0060575	intestinal epithelial cell differentiation	8/1558	25/18903	0.000632174	0.0176668	0.0153607	C1GALT1/SPDEF/HIF1A/IL6ST/KLF5/PRDM1/FZD5/PTK6	8
GO:0018209	peptidyl-serine modification	45/1558	332/18903	0.000646086	0.0179675	0.0156222	EIF2AK3/PRKAA1/CAMK2D/PAQR3/PDE4D/RPS6KA3/GALNT1/RIPK2/TGFBR1/UHMK1/MORC3/RICTOR/TGFBR2/TLK1/FNIP2/MAPK8/STK38L/CHUK/PKN2/PRKCH/PIKFYVE/GALNT3/LATS2/INPP5F/NEK7/FNIP1/NCK1/CDK1/TBK1/CSNK1G3/PIK3CA/PDCD10/POGLUT3/SGK1/MASTL/ATM/RPS6KA4/STK39/CNKSR3/GPD1L/CLK1/MAP4K1/TFRC/RAPGEF3/WNT5A	45
GO:0030433	ubiquitin-dependent ERAD pathway	17/1558	87/18903	0.00065676	0.0180879	0.0157268	UBQLN1/UBE2J1/DNAJB14/DERL1/STT3B/UBXN4/YOD1/DNAJB9/MAN1A1/RNF103/SEL1L/USP14/EDEM3/HERPUD1/UBE4A/SVIP/JKAMP	17
GO:2000134	negative regulation of G1/S transition of mitotic cell cycle	17/1558	87/18903	0.00065676	0.0180879	0.0157268	CDKN1B/RB1/EZH2/WAC/CDC73/RPL26/DLG1/TRIAP1/ZNF655/SDE2/ATM/E2F7/SLFN11/CTDSPL/GPNMB/CASP2/CRLF3	17
GO:0032609	interferon-gamma production	21/1558	119/18903	0.000682147	0.0186073	0.0161785	RASGRP1/PDE4D/CD274/RIPK2/CYRIB/CD47/JAK2/TLR3/PTPN22/CD2/IL1R1/HLA-DPA1/FZD5/SASH3/VSIR/CD3E/CLEC7A/CD96/HLA-DRB1/WNT5A/HLA-DPB1	21
GO:0032649	regulation of interferon-gamma production	21/1558	119/18903	0.000682147	0.0186073	0.0161785	RASGRP1/PDE4D/CD274/RIPK2/CYRIB/CD47/JAK2/TLR3/PTPN22/CD2/IL1R1/HLA-DPA1/FZD5/SASH3/VSIR/CD3E/CLEC7A/CD96/HLA-DRB1/WNT5A/HLA-DPB1	21
GO:0002440	production of molecular mediator of immune response	45/1558	333/18903	0.000688885	0.0187016	0.0162605	DENND1B/UBE2J1/ATG5/RIPK2/SIRT1/B2M/DDX21/DNAJB9/RIF1/NDFIP1/MALT1/HLA-DQA1/TLR3/HLA-DMA/PTPN22/XBP1/CD36/HLA-DMB/HLA-G/ACP5/BCL10/IRAK3/SLC15A4/NBN/CD55/HLA-DRB5/HLA-DRA/MYD88/IL1R1/HLA-DPA1/HLA-DQB1/FZD5/SASH3/TFRC/CD74/HLA-F/LACC1/CLEC7A/BATF/CD96/HLA-E/HLA-DRB1/HLA-DOA/WNT5A/HLA-DPB1	45
GO:0000082	G1/S transition of mitotic cell cycle	36/1558	250/18903	0.000718884	0.0194235	0.0168881	CDK6/CDKN1B/RB1/CDK17/PPP2CA/EZH2/WAC/CDC73/PPP6C/RPL26/DLG1/CUL5/LATS2/APPL1/SMARCE1/BACH1/CUL3/GSPT1/TRIAP1/BCAT1/ZNF655/BID/DDX3X/PPP3CA/SDE2/ATM/E2F7/NPAT/ID2/SLFN11/CTDSPL/GPNMB/CASP2/RHOU/ARID2/CRLF3	36
GO:0030218	erythrocyte differentiation	22/1558	128/18903	0.000745235	0.0200405	0.0174246	CDK6/RB1/PTBP3/CASP3/MFHAS1/SLC25A40/SP3/B2M/SMAP1/L3MBTL3/TMOD3/HIF1A/SMAD5/JAK2/LYN/ARID4A/UFL1/ID2/ETS1/IKZF1/HSPA1B/STAT1	22
GO:0046637	regulation of alpha-beta T cell differentiation	15/1558	73/18903	0.000775173	0.0207477	0.0180395	RIPK2/CBFB/TGFBR2/RC3H2/MALT1/AP3B1/HLA-DRA/PRDM1/ZAP70/SOCS5/SASH3/BATF/HLA-DRB1/IL2RG/RUNX3	15
GO:1901990	regulation of mitotic cell cycle phase transition	47/1558	354/18903	0.000781529	0.0208201	0.0181024	CDKN1B/RB1/PPP2CA/EZH2/CCNG1/BUB3/ZNF207/RAB11A/TAOK1/WAC/CDC73/RPL26/DLG1/BARD1/RINT1/APPL1/RIOK2/GEN1/SMARCE1/CUL3/CDK1/SPDL1/TMOD3/TRIAP1/ANLN/ZNF655/CDC27/BID/NBN/MAD2L1/DDX3X/SDE2/ATM/E2F7/ZWILCH/ID2/SLFN11/CTDSPL/GPNMB/CASP2/CDC20/CCNB1/ARID2/CRLF3/CDT1/ZWINT/NABP1	47
GO:0034101	erythrocyte homeostasis	23/1558	137/18903	0.000800829	0.021235	0.0184632	CDK6/RB1/PTBP3/CASP3/MFHAS1/SLC25A40/SP3/B2M/IREB2/SMAP1/L3MBTL3/TMOD3/HIF1A/SMAD5/JAK2/LYN/ARID4A/UFL1/ID2/ETS1/IKZF1/HSPA1B/STAT1	23
GO:0007041	lysosomal transport	22/1558	129/18903	0.000829948	0.0219053	0.0190459	CHMP2B/TMEM106B/PLEKHF1/EHD3/ARL8B/SCARB2/VAMP7/LAMP2/RAB12/AP3M1/CHMP1B/SCYL2/BIN1/CHMP3/SNX16/HOOK3/AP3B1/VPS54/ATG14/GNPTAB/PLEKHF2/GRN	22
GO:0006904	vesicle docking involved in exocytosis	11/1558	45/18903	0.000847793	0.0222731	0.0193658	VAMP3/EXOC8/RAB8B/RAB10/YKT6/RAB12/EXOC5/BLOC1S6/STXBP3/EXOC6/PPFIA3	11
GO:0044843	cell cycle G1/S phase transition	39/1558	280/18903	0.000852627	0.0222974	0.0193869	CDK6/CDKN1B/RB1/CDK17/PPP2CA/FAM83D/EZH2/WAC/CDC73/PPP6C/RPL26/DLG1/FBXW7/CUL5/LATS2/APPL1/SMARCE1/BACH1/CUL3/GSPT1/TRIAP1/BCAT1/ZNF655/BID/DDX3X/PPP3CA/SDE2/ATM/E2F7/NPAT/ID2/SLFN11/CTDSPL/GPNMB/CASP2/RHOU/ARID2/CRLF3/NKX3-1	39
GO:0045010	actin nucleation	13/1558	59/18903	0.000858967	0.0223606	0.0194418	WASL/AP1AR/GMFB/ARPC2/NCKAP1/ARFIP1/WASHC4/ARPC5/FCHSD2/JMY/ACTR2/ACTR3/CORO1A	13
GO:0046777	protein autophosphorylation	33/1558	226/18903	0.00092028	0.0236991	0.0206056	RAP2C/EIF2AK3/STK26/CAMK2D/RAP2A/UHMK1/TAOK1/STK17B/PIKFYVE/EIF2S1/RIOK2/SLK/JAK2/LYN/OXSR1/IRAK3/TRPM7/NBN/DDX3X/PIM1/ATM/LCK/DAPK2/FGFR2/STK39/MOB1B/GPNMB/ZAP70/PTK6/CLK1/MAP4K1/NEK2/PIM3	33
GO:0031929	TOR signaling	22/1558	130/18903	0.000922854	0.0236991	0.0206056	FAM83D/PRKAA1/PRKAA2/RRAGC/RICTOR/LAMTOR3/SIRT1/WAC/BMT2/LAMTOR5/SEH1L/ZMPSTE24/FNIP1/HIF1A/PIK3CA/GPAT3/SESN3/TIPRL/ATM/MFSD8/BMAL1/DEPTOR	22
GO:0045621	positive regulation of lymphocyte differentiation	22/1558	130/18903	0.000922854	0.0236991	0.0206056	RASGRP1/IL15/RIPK2/CBFB/TGFBR2/SMARCE1/MALT1/ZBTB1/AP3B1/XBP1/HLA-G/HLA-DRA/IL15RA/ZAP70/SOCS5/SASH3/ARID2/VSIR/CD74/HLA-DRB1/IL2RG/RUNX3	22
GO:1905897	regulation of response to endoplasmic reticulum stress	16/1558	82/18903	0.00095051	0.0242998	0.0211279	UBQLN1/EIF2AK3/SIRT1/AGR2/TMEM33/DNAJB9/OPA1/NCK1/USP14/CREB3L1/HERPUD1/XBP1/RNFT1/USP25/UFL1/SVIP	16
GO:1902807	negative regulation of cell cycle G1/S phase transition	18/1558	98/18903	0.000992787	0.0252673	0.0219691	CDKN1B/RB1/EZH2/WAC/CDC73/RPL26/DLG1/TRIAP1/ZNF655/SDE2/ATM/E2F7/SLFN11/CTDSPL/GPNMB/CASP2/CRLF3/NKX3-1	18
GO:0002753	cytoplasmic pattern recognition receptor signaling pathway	13/1558	60/18903	0.00101512	0.025721	0.0223636	CYLD/RIPK2/BIRC2/RIOK3/USP15/OTULIN/TIFA/PTPN22/BIRC3/SLC15A4/HSPA1B/LACC1/SLC15A2	13
GO:0007094	mitotic spindle assembly checkpoint signaling	11/1558	46/18903	0.00103241	0.0258014	0.0224335	BUB3/ZNF207/GEN1/SPDL1/MAD2L1/ATM/ZWILCH/CDC20/CCNB1/CDT1/ZWINT	11
GO:0071173	spindle assembly checkpoint signaling	11/1558	46/18903	0.00103241	0.0258014	0.0224335	BUB3/ZNF207/GEN1/SPDL1/MAD2L1/ATM/ZWILCH/CDC20/CCNB1/CDT1/ZWINT	11
GO:0071174	mitotic spindle checkpoint signaling	11/1558	46/18903	0.00103241	0.0258014	0.0224335	BUB3/ZNF207/GEN1/SPDL1/MAD2L1/ATM/ZWILCH/CDC20/CCNB1/CDT1/ZWINT	11
GO:0016239	positive regulation of macroautophagy	15/1558	75/18903	0.00104011	0.0258014	0.0224335	PRKAA2/GNAI3/RIPK2/SNX4/SIRT1/WAC/SH3GLB1/SCOC/MOAP1/SNX18/HIF1A/TBK1/BNIP3L/SESN3/WIPI1	15
GO:0046638	positive regulation of alpha-beta T cell differentiation	12/1558	53/18903	0.00104202	0.0258014	0.0224335	RIPK2/CBFB/TGFBR2/MALT1/AP3B1/HLA-DRA/ZAP70/SOCS5/SASH3/HLA-DRB1/IL2RG/RUNX3	12
GO:0034755	iron ion transmembrane transport	7/1558	21/18903	0.0010545	0.0258014	0.0224335	SLC39A8/MMGT1/ATP7A/SLC39A14/SLC25A28/SLC40A1/STEAP2	7
GO:0036092	phosphatidylinositol-3-phosphate biosynthetic process	7/1558	21/18903	0.0010545	0.0258014	0.0224335	PIK3CB/PIKFYVE/PIK3CA/ATG14/SYNJ1/PIK3C2A/ATM	7
GO:0043555	regulation of translation in response to stress	7/1558	21/18903	0.0010545	0.0258014	0.0224335	EIF2AK3/RPS6KA3/TMED2/EIF2S1/NCK1/DNAJC3/DDX3X	7
GO:0001782	B cell homeostasis	9/1558	33/18903	0.00107238	0.0261266	0.0227163	CASP3/RC3H2/SOS2/HIF1A/LYN/BCL10/DOCK10/SASH3/CD74	9
GO:0042157	lipoprotein metabolic process	23/1558	140/18903	0.00108579	0.0263408	0.0229025	ZDHHC21/ABHD13/ATG5/ABHD17C/LYPLA1/PPM1B/ITGAV/GOLGA7/UGCG/LYPLAL1/PPM1A/ZDHHC20/DPM1/PIGK/ZDHHC17/PIGA/ATG12/WIPI1/SVIP/ATM/APOL3/APOL6/ABCA1	23
GO:0006054	N-acetylneuraminate metabolic process	5/1558	11/18903	0.00114398	0.0275182	0.0239262	CMAS/GNPDA2/NPL/GNE/ST3GAL1	5
GO:0036490	regulation of translation in response to endoplasmic reticulum stress	5/1558	11/18903	0.00114398	0.0275182	0.0239262	EIF2AK3/TMED2/NCK1/DNAJC3/DDX3X	5
GO:0018105	peptidyl-serine phosphorylation	42/1558	313/18903	0.00117293	0.0280962	0.0244288	EIF2AK3/PRKAA1/CAMK2D/PAQR3/PDE4D/RPS6KA3/RIPK2/TGFBR1/UHMK1/MORC3/RICTOR/TGFBR2/TLK1/FNIP2/MAPK8/STK38L/CHUK/PKN2/PRKCH/PIKFYVE/LATS2/INPP5F/NEK7/FNIP1/NCK1/CDK1/TBK1/CSNK1G3/PIK3CA/PDCD10/SGK1/MASTL/ATM/RPS6KA4/STK39/CNKSR3/GPD1L/CLK1/MAP4K1/TFRC/RAPGEF3/WNT5A	42
GO:0072659	protein localization to plasma membrane	39/1558	285/18903	0.00119528	0.0282866	0.0245943	FCHO2/VAMP3/PLS1/HYCC2/PLEKHF1/RAB8B/RAP1A/EHD3/RAP2A/PALS1/RAB10/LYPLA1/RAB11A/GOLGA7/EFR3A/GORASP2/AGR2/TMED2/DLG1/RAB12/KIF5B/NSF/PRKCH/EXOC5/ATP1B1/ARL6IP5/APPL1/PPP2R5A/ACSL3/SEC23A/STX3/ARHGEF16/BLZF1/ATP2C1/TPBG/PICALM/HYCC1/VAMP5/AMN	39
GO:0032434	regulation of proteasomal ubiquitin-dependent protein catabolic process	23/1558	141/18903	0.00119843	0.0282866	0.0245943	RBX1/UBQLN1/RNF217/UBE2K/RCHY1/ANKIB1/WAC/STYX/UCHL5/RNF19A/SOCS4/USP14/HERPUD1/XPO1/UFL1/SVIP/RNF19B/RYBP/SOCS5/HSPA1B/CDC20/SDCBP/CDC20B	23
GO:0043001	Golgi to plasma membrane protein transport	10/1558	40/18903	0.00119998	0.0282866	0.0245943	VAMP3/RAB10/LYPLA1/GOLGA7/NSF/ACSL3/BLZF1/ATP2C1/VAMP5/AMN	10
GO:0006825	copper ion transport	6/1558	16/18903	0.00120569	0.0282866	0.0245943	MMGT1/ATP7A/STEAP4/SLC31A2/STEAP2/SLC31A1	6
GO:0070431	nucleotide-binding oligomerization domain containing 2 signaling pathway	6/1558	16/18903	0.00120569	0.0282866	0.0245943	RIPK2/OTULIN/PTPN22/SLC15A4/HSPA1B/LACC1	6
GO:0043254	regulation of protein-containing complex assembly	52/1558	410/18903	0.00121784	0.0283775	0.0246734	CDKN1B/MTPN/RB1/CAPZA2/ARPC2/RHOC/CYRIB/RICTOR/SH3GLB1/FNIP2/DLG1/NCKAP1/CTNNBIP1/SAR1A/BIRC2/RIOK3/PPM1A/CAND1/CRBN/CAPZA1/NEK7/FNIP1/TWF2/NCK1/BIN1/TMOD3/ARPC5/ASAP1/CAMSAP2/STMP1/FCHSD2/CD36/BID/STXBP5/MPP7/MET/DDX3X/TMC8/NLRC3/MYD88/SVIP/ATM/FBLIM1/CDC42EP2/HSPA1B/CORO1A/TFRC/WARS1/CLEC7A/TMSB10/CDT1/ABCA1	52
GO:0046916	cellular transition metal ion homeostasis	20/1558	116/18903	0.00121952	0.0283775	0.0246734	SLC39A8/ATP6V1G1/SLC30A1/SLC30A7/TMEM199/IREB2/NDFIP1/ATP7A/SLC30A6/HIF1A/SLC30A9/AP3B1/SLC39A14/STEAP4/LCK/SLC31A2/SLC40A1/STEAP2/SLC31A1/TFRC	20
GO:0042149	cellular response to glucose starvation	12/1558	54/18903	0.00124084	0.0287109	0.0249632	EIF2AK3/PRKAA1/PRKAA2/SIRT1/SH3GLB1/CPEB4/UPP1/XBP1/ATG14/IFI16/SESN3/PLIN2	12
GO:0031577	spindle checkpoint signaling	11/1558	47/18903	0.00124895	0.0287109	0.0249632	BUB3/ZNF207/GEN1/SPDL1/MAD2L1/ATM/ZWILCH/CDC20/CCNB1/CDT1/ZWINT	11
GO:0072583	clathrin-dependent endocytosis	11/1558	47/18903	0.00124895	0.0287109	0.0249632	FCHO2/WASL/PIK3CB/INPP5F/SMAP1/SCYL2/FCHSD2/LMBRD1/ITGA4/PICALM/DGKD	11
GO:0030071	regulation of mitotic metaphase/anaphase transition	17/1558	92/18903	0.00126472	0.0289564	0.0251767	RB1/BUB3/ZNF207/RIOK2/GEN1/SMARCE1/CUL3/SPDL1/CDC27/MAD2L1/ATM/ZWILCH/CDC20/CCNB1/ARID2/CDT1/ZWINT	17
GO:0007059	chromosome segregation	49/1558	382/18903	0.00130385	0.0296379	0.0257692	CHMP2B/RB1/FAM83D/BUB3/KAT2B/NR3C1/ZNF207/RAB11A/CENPX/UBE2B/ARL8B/ECT2/TLK1/SEH1L/FBXW7/RIOK3/EML4/NAA50/PDS5A/ABRAXAS2/CHMP1B/SMC4/RIOK2/GEN1/SMARCE1/CUL3/SPDL1/CHMP3/STAG2/CDC27/SMC5/ACTR2/PMF1/MAD2L1/DDX3X/SKA2/NDC1/SYCP2/ATM/ACTR3/ZWILCH/SRPK1/ESCO1/CDC20/CCNB1/ARID2/NEK2/CDT1/ZWINT	49
GO:0002260	lymphocyte homeostasis	14/1558	69/18903	0.00130488	0.0296379	0.0257692	CASP3/RC3H2/SOS2/HIF1A/LYN/SKIL/BCL10/DOCK10/TCIRG1/SASH3/SLC40A1/CORO1A/CD74/FAS	14
GO:0035459	vesicle cargo loading	9/1558	34/18903	0.0013531	0.0305325	0.0265471	SEC24D/SEC24A/RAB1A/TMED2/SAR1A/AP3M1/SEC23A/AP3B1/PICALM	9
GO:0045582	positive regulation of T cell differentiation	20/1558	117/18903	0.00135941	0.0305325	0.0265471	RASGRP1/RIPK2/CBFB/TGFBR2/SMARCE1/MALT1/ZBTB1/AP3B1/XBP1/HLA-G/HLA-DRA/ZAP70/SOCS5/SASH3/ARID2/VSIR/CD74/HLA-DRB1/IL2RG/RUNX3	20
GO:0000075	cell cycle checkpoint signaling	28/1558	186/18903	0.00136033	0.0305325	0.0265471	CDKN1B/FEM1B/CCNG1/BUB3/ZNF207/TAOK1/CLOCK/WAC/RPL26/BARD1/RINT1/GEN1/CDK1/SPDL1/TRIAP1/NBN/MAD2L1/TIPRL/SDE2/ATM/ZWILCH/CASP2/CDC20/ETAA1/CCNB1/CDT1/ZWINT/NABP1	28
GO:0000070	mitotic sister chromatid segregation	30/1558	204/18903	0.00136894	0.0306053	0.0266103	CHMP2B/RB1/BUB3/KAT2B/ZNF207/RAB11A/SEH1L/EML4/NAA50/PDS5A/CHMP1B/SMC4/RIOK2/GEN1/SMARCE1/CUL3/SPDL1/CHMP3/CDC27/SMC5/MAD2L1/ATM/ZWILCH/ESCO1/CDC20/CCNB1/ARID2/NEK2/CDT1/ZWINT	30
GO:0001909	leukocyte mediated cytotoxicity	22/1558	134/18903	0.00138975	0.0309491	0.0269093	RAB27A/RASGRP1/CYRIB/ARL8B/VAMP7/B2M/KIF5B/HPRT1/CTSC/HLA-G/TAP2/CD2/HLA-DRA/MYD88/HLA-B/RNF19B/CXCL6/CORO1A/HLA-F/HLA-E/HLA-DRB1/AZGP1	22
GO:0046822	regulation of nucleocytoplasmic transport	19/1558	109/18903	0.00139756	0.031002	0.0269553	PPP1R12A/UHMK1/CTDSPL2/PPP1CC/ECT2/NUP58/BARD1/PPM1A/NF1/RIOK2/NUP54/CDK1/XPO4/MDFIC/JAK2/CD36/XPO1/SFN/RAPGEF3	19
GO:0007029	endoplasmic reticulum organization	17/1558	93/18903	0.00143113	0.0316236	0.0274957	TRAM1/EIF2AK3/CAV2/VCPIP1/REEP3/RAB10/RAB18/WDR83OS/ARL6IP1/TMED2/TMEM33/MMGT1/LMAN1/CERT1/ATL2/POLR2M/TMEM170A	17
GO:0007039	protein catabolic process in the vacuole	7/1558	22/18903	0.00143754	0.0316426	0.0275122	TMEM106B/LAMP2/TMEM199/VPS13A/LAPTM4B/MFSD8/TCIRG1	7
GO:0034599	cellular response to oxidative stress	39/1558	288/18903	0.00145429	0.0317699	0.0276229	UBQLN1/STK26/CPEB2/PRKAA1/PRKAA2/GSKIP/EZH2/PAWR/SLC25A24/SIRT1/ECT2/GCH1/MAPK8/CHUK/FBXW7/EIF2S1/ARL6IP5/ATP7A/PDK1/CDK1/PLA2R1/HIF1A/STAU2/PDCD10/JAK2/PLEKHA1/CD36/PNPLA8/LANCL1/OSER1/PYCR1/MET/CYP1B1/PDE8A/SLC7A11/MGST1/BMAL1/FUT8/HSPA1B	39
GO:0043244	regulation of protein-containing complex disassembly	21/1558	126/18903	0.00145447	0.0317699	0.0276229	ASPH/MTPN/ATG5/CAPZA2/TAOK1/TMEM39A/ZMPSTE24/CAPZA1/TWF2/GSPT1/TMOD3/CAMSAP2/PIK3CA/ATXN7/ATG12/SPAST/IRAK3/SH3BP1/CFL2/CKAP2/PLEKHH2	21
GO:0001914	regulation of T cell mediated cytotoxicity	10/1558	41/18903	0.00147151	0.0319206	0.0277539	CYRIB/B2M/HLA-G/TAP2/HLA-DRA/HLA-B/HLA-F/HLA-E/HLA-DRB1/AZGP1	10
GO:0046474	glycerophospholipid biosynthetic process	31/1558	214/18903	0.00147257	0.0319206	0.0277539	PI4K2B/FAR1/HYCC2/BPNT2/CHPT1/IMPA1/EFR3A/PIK3CB/MTMR6/CRLS1/PIKFYVE/INPP5F/ETNK1/ACSL3/SOCS4/DPM1/PIGK/PIK3CA/SELENOI/PIGA/GPAT3/ATG14/DGKE/SYNJ1/PLA2G4A/PIK3C2A/ATM/ABHD5/HYCC1/SOCS5/DGKD	31
GO:0045841	negative regulation of mitotic metaphase/anaphase transition	11/1558	48/18903	0.00150146	0.0324235	0.0281913	BUB3/ZNF207/GEN1/SPDL1/MAD2L1/ATM/ZWILCH/CDC20/CCNB1/CDT1/ZWINT	11
GO:2001235	positive regulation of apoptotic signaling pathway	22/1558	135/18903	0.00153395	0.0330003	0.0286927	PLEKHF1/CYLD/TGFBR1/SIRT1/RPL26/FBXW7/NF1/NCK1/CTSC/JAK2/BID/DNM1L/SKIL/BCL10/TNFSF10/BMPR1B/STK3/LCK/TPD52L1/CASP2/NKX3-1/FAS	22
GO:0034250	positive regulation of cellular amide metabolic process	26/1558	170/18903	0.00157375	0.0337292	0.0293265	SLC2A13/SAMD4A/EIF6/FMR1/YTHDF3/UHMK1/CASP3/RPL26/SERP1/RBM3/FASTKD3/IFNGR1/SH3BGRL/NCK1/CPEB3/DHX29/SYNCRIP/DNAJC3/CYP1B1/LARP4/DDX3X/PICALM/LARP1B/TRMT10C/FASTKD2/GSAP	26
GO:0010948	negative regulation of cell cycle process	42/1558	318/18903	0.00159768	0.0341137	0.0296608	CDKN1B/RB1/FEM1B/EZH2/CCNG1/BUB3/KAT2B/ZNF207/TAOK1/CLOCK/WAC/CDC73/RPL26/DLG1/BARD1/RINT1/GEN1/CDK1/SPDL1/TRIAP1/ZNF655/HLA-G/NBN/MAD2L1/TIPRL/SDE2/ATM/E2F7/ZWILCH/SLFN11/CTDSPL/GPNMB/CASP2/CDC20/ETAA1/CCNB1/NEK2/CRLF3/CDT1/ZWINT/NABP1/NKX3-1	42
GO:0032456	endocytic recycling	16/1558	86/18903	0.00161125	0.0342751	0.0298012	DENND1B/RAB8B/VAMP4/VPS26A/EHD3/RAB11A/SNX4/RAB14/EPS15/VPS29/ARL4C/ACAP2/VPS26C/INPP5F/BLTP1/VPS50	16
GO:0002708	positive regulation of lymphocyte mediated immunity	20/1558	119/18903	0.00168053	0.0356161	0.0309671	DENND1B/RASGRP1/CYRIB/B2M/RIF1/MALT1/ZBTB1/HLA-G/CD55/TAP2/HLA-DRA/HLA-B/IL1R1/FZD5/SASH3/TFRC/HLA-F/HLA-E/HLA-DRB1/AZGP1	20
GO:0033047	regulation of mitotic sister chromatid segregation	12/1558	56/18903	0.00173303	0.0363457	0.0316014	BUB3/KAT2B/ZNF207/GEN1/SPDL1/MAD2L1/ATM/ZWILCH/CDC20/CCNB1/CDT1/ZWINT	12
GO:0051438	regulation of ubiquitin-protein transferase activity	12/1558	56/18903	0.00173303	0.0363457	0.0316014	BMI1/FEM1B/BUB3/FBXW7/DCUN1D5/DNM1L/DCUN1D1/MAD2L1/ARRDC3/MASTL/CDC20/CDC20B	12
GO:0002695	negative regulation of leukocyte activation	29/1558	198/18903	0.00173514	0.0363457	0.0316014	CD274/TWSG1/PAWR/CBFB/CASP3/MARCHF7/PAG1/DLG1/NDFIP1/RC3H2/LYN/PTPN22/HLA-G/CD84/ATM/IDO1/ID2/IRF1/GPNMB/TBC1D10C/SOCS5/TMEM131L/BANK1/VSIR/CD74/HLA-F/GRN/HLA-DRB1/RUNX3	29
GO:0051057	positive regulation of small GTPase mediated signal transduction	14/1558	71/18903	0.00174046	0.0363457	0.0316014	KRAS/LPAR6/RASGRP1/KITLG/ITGAV/PIK3CB/LPAR1/LRRC59/ARHGEF3/SHOC2/SOS2/CSF1/TGM2/F2R	14
GO:0050868	negative regulation of T cell activation	21/1558	128/18903	0.00178003	0.0370363	0.0322019	CD274/TWSG1/PAWR/CBFB/CASP3/MARCHF7/PAG1/DLG1/NDFIP1/RC3H2/PTPN22/HLA-G/IDO1/IRF1/GPNMB/SOCS5/TMEM131L/VSIR/CD74/HLA-DRB1/RUNX3	21
GO:0032814	regulation of natural killer cell activation	10/1558	42/18903	0.00179085	0.037126	0.0322799	RASGRP1/IL15/BLOC1S6/ZBTB1/JAK2/PTPN22/IL15RA/PRDM1/HLA-F/HLA-E	10
GO:0007091	metaphase/anaphase transition of mitotic cell cycle	17/1558	95/18903	0.00181982	0.0372301	0.0323704	RB1/BUB3/ZNF207/RIOK2/GEN1/SMARCE1/CUL3/SPDL1/CDC27/MAD2L1/ATM/ZWILCH/CDC20/CCNB1/ARID2/CDT1/ZWINT	17
GO:1902099	regulation of metaphase/anaphase transition of cell cycle	17/1558	95/18903	0.00181982	0.0372301	0.0323704	RB1/BUB3/ZNF207/RIOK2/GEN1/SMARCE1/CUL3/SPDL1/CDC27/MAD2L1/ATM/ZWILCH/CDC20/CCNB1/ARID2/CDT1/ZWINT	17
GO:0018342	protein prenylation	5/1558	12/18903	0.00182852	0.0372301	0.0323704	PLPP6/PTAR1/RABGGTB/CHML/CHM	5
GO:0097354	prenylation	5/1558	12/18903	0.00182852	0.0372301	0.0323704	PLPP6/PTAR1/RABGGTB/CHML/CHM	5
GO:1900227	positive regulation of NLRP3 inflammasome complex assembly	5/1558	12/18903	0.00182852	0.0372301	0.0323704	NEK7/STMP1/CD36/DDX3X/MYD88	5
GO:0034123	positive regulation of toll-like receptor signaling pathway	8/1558	29/18903	0.00186461	0.0378298	0.0328918	WDFY1/MFHAS1/PJA2/TLR3/PTPN22/SLC15A4/DDX3X/TLR2	8
GO:0044089	positive regulation of cellular component biogenesis	60/1558	498/18903	0.00188428	0.0380933	0.0331209	WASL/CDKN1B/FMR1/ARPC2/RHOC/TGFBR1/RICTOR/SNX4/SH3GLB1/CD47/FNIP2/DLG1/NCKAP1/LPAR1/RALA/MOAP1/CAND1/CRBN/ATP7A/SNX18/PLK4/IL1RAP/NEK7/FNIP1/TWF2/NCK1/BIN1/ASAP1/G3BP2/STAU2/STMP1/PIK3CA/FCHSD2/ANLN/CD36/RESF1/BID/ACTR2/HAS3/WIPI1/CNOT6L/FAM98A/TPBG/MPP7/MET/DDX3X/EPS8L3/MYD88/ATM/ACTR3/SEMA4D/CDC42EP2/HSPA1B/SDCBP/TFRC/WARS1/CLEC7A/RAPGEF3/CDT1/ABCA1	60
GO:0048524	positive regulation of viral process	13/1558	64/18903	0.00189655	0.0382057	0.0332187	ATG5/FMR1/TMEM39A/PKN2/PDE12/MDFIC/VPS37B/ATG12/DDX3X/SMPD1/SRPK1/CD74/HLA-DRB1	13
GO:1903050	regulation of proteolysis involved in protein catabolic process	32/1558	227/18903	0.00195367	0.0392178	0.0340986	RBX1/UBQLN1/RNF217/UBE2K/RCHY1/FMR1/RNF139/ANKIB1/WAC/MARCHF7/STYX/UCHL5/FBXW7/RNF19A/SOCS4/CTSC/USP14/TMTC3/HERPUD1/RNFT1/USP25/RHBDF1/XPO1/UFL1/SVIP/RNF19B/RYBP/SOCS5/HSPA1B/CDC20/SDCBP/CDC20B	32
GO:0031331	positive regulation of cellular catabolic process	53/1558	429/18903	0.00196736	0.0393541	0.0342171	RBX1/UBQLN1/SAMD4A/PRKAA1/PRKAA2/RNF217/PLEKHF1/RCHY1/GNAI3/RIPK2/YTHDF3/DIS3/RNF139/ANKIB1/SNX4/SIRT1/WAC/SH3GLB1/PIK3CB/ADAM9/SCOC/MOAP1/SLC4A4/FBXW7/RNF19A/RC3H2/PDE12/SNX18/SOCS4/HIF1A/TBK1/DCP2/CPEB3/HERPUD1/BNIP3L/SESN3/SYNCRIP/WIPI1/CNOT6L/UFL1/PIK3C2A/SVIP/ATM/RNF19B/ABHD5/PATL1/RIDA/SOCS5/TRIM22/HSPA1B/CDC20/IRS2/CDC20B	53
GO:0050878	regulation of body fluid levels	49/1558	390/18903	0.00201682	0.0402023	0.0349547	GNA13/NME1/RAB27A/ATG5/CREB1/AK3/AGR2/PIK3CB/UGCG/AKAP11/TSPAN8/ST3GAL4/BLOC1S6/STXBP3/ATP7A/LMAN1/F3/HIF1A/PAM/HPSE/PIK3CA/AP3B1/C1GALT1C1/JAK2/IL6ST/LYN/XBP1/CD36/DGKE/ENTPD1/ENPP4/MET/PLA2G4A/JMJD1C/PRKACB/PPP3CA/AQP5/LCK/STK39/SLC7A11/TFPI/TFPI2/HK2/GRHL3/DGKD/PAPSS2/SFN/F2R/ADTRP	49
GO:0045807	positive regulation of endocytosis	17/1558	96/18903	0.00204522	0.0406265	0.0353234	WASL/MIB1/FMR1/PPP3CC/B2M/CBLL1/RAB21/APPL1/SCYL2/BIN1/CD36/ATAD1/SYNJ1/PPP3CA/SMPD1/DGKD/WNT5A	17
GO:0090174	organelle membrane fusion	20/1558	121/18903	0.00206384	0.0408541	0.0355213	CHMP2B/VAMP3/CAV2/VCPIP1/BET1/RAB8B/GNAI3/VAMP4/TBC1D4/ARL8B/VAMP7/GOSR2/PIKFYVE/YIPF5/CHMP1B/EEA1/SNAP23/STX3/CHMP3/CORO1A	20
GO:1902100	negative regulation of metaphase/anaphase transition of cell cycle	11/1558	50/18903	0.00213191	0.0420555	0.036566	BUB3/ZNF207/GEN1/SPDL1/MAD2L1/ATM/ZWILCH/CDC20/CCNB1/CDT1/ZWINT	11
GO:0044000	movement in host	27/1558	183/18903	0.00220489	0.0433452	0.0376873	CHMP2B/CAV2/ITGAV/SLC7A1/ARL8B/EPS15/SCARB2/PIKFYVE/CHMP1B/CDK1/CHMP3/VPS37B/WWP1/ZNF639/IDE/CD55/CXADR/SMPD1/CCR5/ITGB7/TRIM22/SERPINB3/HSPA1B/TRIM31/TFRC/CD74/HLA-DRB1	27
GO:0006898	receptor-mediated endocytosis	35/1558	257/18903	0.00224696	0.0440203	0.0382743	FCHO2/PPP3R1/WASL/CAV2/FMR1/ITGAV/TGFBR2/RAB5A/EPS15/SCARB2/PIK3CB/B2M/RALA/RAB21/PIKFYVE/INPP5F/SMAP1/SCYL2/CD2AP/ANKRD13A/AP4E1/LRP3/PLA2R1/FCHSD2/LMBRD1/CD36/ATAD1/SYNJ1/ITGA4/PICALM/CXCL16/DGKD/SDCBP/TFRC/AMN	35
GO:0042060	wound healing	54/1558	442/18903	0.00229062	0.044722	0.0388844	CHMP2B/GNA13/FGFR1OP2/RAB27A/RHOC/TGFBR1/TGFA/AK3/CASP3/TGFBR2/ARL8B/PIK3CB/SLC12A2/LOX/TSPAN8/ST3GAL4/BLOC1S6/NF1/STXBP3/LMAN1/CHMP1B/F3/HIF1A/CHMP3/HPSE/PIK3CA/PDCD10/AP3B1/C1GALT1C1/JAK2/IL6ST/LYN/XBP1/CD36/DGKE/ENTPD1/ENPP4/PLA2G4A/JMJD1C/PPP3CA/LCK/FGFR2/SMPD1/SLC7A11/TFPI/TFPI2/GRHL3/DGKD/PAPSS2/F2R/CLEC7A/ADTRP/JAML/WNT5A	54
GO:0050000	chromosome localization	16/1558	89/18903	0.00232902	0.0453165	0.0394013	CHMP2B/FAM83D/KAT2B/RAB11A/UBE2B/SEH1L/EML4/CHMP1B/CUL3/SPDL1/CHMP3/ACTR2/ATM/ACTR3/CCNB1/CDT1	16
GO:2000108	positive regulation of leukocyte apoptotic process	8/1558	30/18903	0.00236142	0.0457907	0.0398136	CD274/SIRT1/PIK3CB/NF1/FNIP1/LYN/IDO1/WNT5A	8
GO:0006826	iron ion transport	12/1558	58/18903	0.00237521	0.045902	0.0399104	SLC39A8/PGRMC2/B2M/IREB2/MMGT1/ATP7A/SLC39A14/STEAP4/SLC25A28/SLC40A1/STEAP2/TFRC	12
GO:0009267	cellular response to starvation	26/1558	175/18903	0.00238645	0.0459634	0.0399638	EIF2AK3/STK26/PRKAA1/PRKAA2/ATG5/RRAGC/SIRT1/SH3GLB1/BMT2/LAMP2/MAPK8/SEH1L/EIF2S1/CPEB4/FNIP1/UPP1/FOXA3/XBP1/JMY/ATG14/IFI16/SESN3/WIPI1/SLC38A2/PLIN2/FAS	26
GO:0006473	protein acetylation	32/1558	230/18903	0.00241302	0.0460194	0.0400124	DR1/BMI1/PRKAA1/PRKAA2/EID1/ATG5/KAT2B/TAOK1/BLOC1S1/CLOCK/SIRT1/DDX21/NAA30/NCOA3/ZMPSTE24/DEK/NAA50/TAF2/YEATS4/SF3B1/PHF20L1/MBIP/ATXN7/MLLT3/SMC5/MBTD1/DDX3X/NAA16/BMAL1/SDR16C5/ESCO1/RAPGEF3	32
GO:0140014	mitotic nuclear division	42/1558	325/18903	0.00241507	0.0460194	0.0400124	MZT1/CHMP2B/CDKN1B/RB1/CAV2/REEP3/BUB3/KAT2B/ZNF207/RAB11A/TGFA/PHIP/SEH1L/EML4/NAA50/PDS5A/ABRAXAS2/CHMP1B/SMC4/RIOK2/GEN1/SMARCE1/CUL3/SPDL1/CHMP3/ANLN/STAG2/CDC27/SMC5/SPAST/MAD2L1/ATM/BORA/ZWILCH/ESCO1/HSPA1B/CDC20/CCNB1/ARID2/NEK2/CDT1/ZWINT	42
GO:0036499	PERK-mediated unfolded protein response	6/1558	18/18903	0.00242165	0.0460194	0.0400124	EIF2AK3/AGR2/TMED2/TMEM33/EIF2S1/NCK1	6
GO:1905146	lysosomal protein catabolic process	6/1558	18/18903	0.00242165	0.0460194	0.0400124	TMEM106B/LAMP2/TMEM199/VPS13A/LAPTM4B/MFSD8	6
GO:0002705	positive regulation of leukocyte mediated immunity	22/1558	140/18903	0.00246174	0.0466258	0.0405396	DENND1B/RASGRP1/CYRIB/B2M/DDX21/RIF1/MALT1/ZBTB1/HLA-G/CD55/TAP2/HLA-DRA/HLA-B/IL1R1/FZD5/SASH3/TFRC/HLA-F/CLEC7A/HLA-E/HLA-DRB1/AZGP1	22
GO:0033046	negative regulation of sister chromatid segregation	11/1558	51/18903	0.00251937	0.0471628	0.0410066	BUB3/ZNF207/GEN1/SPDL1/MAD2L1/ATM/ZWILCH/CDC20/CCNB1/CDT1/ZWINT	11
GO:0033048	negative regulation of mitotic sister chromatid segregation	11/1558	51/18903	0.00251937	0.0471628	0.0410066	BUB3/ZNF207/GEN1/SPDL1/MAD2L1/ATM/ZWILCH/CDC20/CCNB1/CDT1/ZWINT	11
GO:2000816	negative regulation of mitotic sister chromatid separation	11/1558	51/18903	0.00251937	0.0471628	0.0410066	BUB3/ZNF207/GEN1/SPDL1/MAD2L1/ATM/ZWILCH/CDC20/CCNB1/CDT1/ZWINT	11
GO:0031343	positive regulation of cell killing	13/1558	66/18903	0.00253146	0.0471628	0.0410066	RASGRP1/CYRIB/B2M/MAPK8/HLA-G/TAP2/HLA-DRA/HLA-B/HLA-F/CLEC7A/HLA-E/HLA-DRB1/AZGP1	13
GO:0048278	vesicle docking	13/1558	66/18903	0.00253146	0.0471628	0.0410066	VAMP3/CAV2/EXOC8/RAB8B/RAB10/YKT6/RAB12/EXOC5/BLOC1S6/STXBP3/STX3/EXOC6/PPFIA3	13
GO:0008654	phospholipid biosynthetic process	35/1558	259/18903	0.00255975	0.047352	0.0411711	PI4K2B/FAR1/HYCC2/SGMS1/BPNT2/CHPT1/IMPA1/EFR3A/PIK3CB/MTMR6/CRLS1/PIKFYVE/INPP5F/ETNK1/ACSL3/SOCS4/DPM1/PIGK/PIK3CA/SELENOI/PIGA/GPAT3/ATG14/DGKE/SYNJ1/PLA2G4A/SAMD8/ORMDL1/PIK3C2A/ATM/SERINC1/ABHD5/HYCC1/SOCS5/DGKD	35
GO:0010965	regulation of mitotic sister chromatid separation	17/1558	98/18903	0.00256653	0.047352	0.0411711	RB1/BUB3/ZNF207/RIOK2/GEN1/SMARCE1/CUL3/SPDL1/CDC27/MAD2L1/ATM/ZWILCH/CDC20/CCNB1/ARID2/CDT1/ZWINT	17
GO:0044784	metaphase/anaphase transition of cell cycle	17/1558	98/18903	0.00256653	0.047352	0.0411711	RB1/BUB3/ZNF207/RIOK2/GEN1/SMARCE1/CUL3/SPDL1/CDC27/MAD2L1/ATM/ZWILCH/CDC20/CCNB1/ARID2/CDT1/ZWINT	17
GO:1903573	negative regulation of response to endoplasmic reticulum stress	10/1558	44/18903	0.00259703	0.0477603	0.0415261	DNAJB9/OPA1/NCK1/USP14/CREB3L1/HERPUD1/XBP1/USP25/UFL1/SVIP	10

## Sheet: Exvivo GO MF Upregulated
ID	Description	GeneRatio	BgRatio	pvalue	p.adjust	qvalue	geneID	Count
GO:0003735	structural constituent of ribosome	39/527	176/18432	8.09567e-24	5.37553e-21	5.1301e-21	RPL7/RPL21/RPS27/RPS7/RPS3A/RPL18A/RPL6/RPS27A/RPL7A/RPS2/RPL10/RPSA/RPL23A/RPL41/RPL12/RPL13A/RPL14/RPL10A/RPL29/RPS25/RPL24/RPL9/RPS15/RPS20/RPL4/RPS28/RPS26/RPS15A/RPL22/RPL27A/RPL23/RPL7L1/RPLP1/RPS8/RPS23/RPL13/RPLP0/RPS18/RPL3	39
GO:0008569	minus-end-directed microtubule motor activity	8/527	18/18432	1.44027e-08	4.78171e-06	4.5634e-06	DNAH1/DNAH2/DNAH10/DNAH3/DNAH9/DNAH11/DNAH5/DNHD1	8
GO:0051959	dynein light intermediate chain binding	8/527	24/18432	2.08022e-07	4.60422e-05	4.39401e-05	DNAH1/DNAH2/DNAH10/DNAH3/DNAH9/DNAH11/DNAH5/DNHD1	8
GO:0003777	microtubule motor activity	12/527	67/18432	3.77584e-07	5.76247e-05	5.49938e-05	KIF27/DNAH1/DNAH2/DNAH10/DNAH3/DNAH9/DNAL4/DNAH11/DNAH5/DNAI2/KIF24/DNHD1	12
GO:0045505	dynein intermediate chain binding	9/527	35/18432	4.33921e-07	5.76247e-05	5.49938e-05	DNAH1/DNAH2/DNAH10/DNAH3/DNAH9/DNAH11/DYNLL1/DNAH5/DNHD1	9
GO:0003774	cytoskeletal motor activity	14/527	111/18432	3.39863e-06	0.000376115	0.000358943	KIF27/DNAH1/MYH10/DNAH2/DNAH10/DNAH3/DNAH9/DNAL4/DNAI1/DNAH11/DNAH5/DNAI2/KIF24/DNHD1	14
GO:0015453	oxidoreduction-driven active transmembrane transporter activity	11/527	71/18432	5.10263e-06	0.000484021	0.000461922	ND6/ND3/CYTB/COX2/COX1/ND1/ND5/ND4/ND2/COX3/ND4L	11
GO:0015631	tubulin binding	26/527	375/18432	3.18146e-05	0.00264061	0.00252005	TBCA/CGN/KIF27/DLEC1/TRAF3IP1/TOGARAM2/CFAP157/TPPP/MAPRE3/MAP1A/MAP1LC3A/BCAS3/TTLL5/EML1/B9D2/EML2/STMND1/TTLL1/GAS2L1/TPPP3/GAS8/KIF24/GABARAP/NCALD/DCDC1/FAM161A	26
GO:0009055	electron transfer activity	13/527	122/18432	4.71097e-05	0.00347565	0.00331696	ND6/SDHC/ND3/CYTB/COX2/COX1/ND1/ND5/ND4/PHGDH/ND2/COX3/ND4L	13
GO:0008137	NADH dehydrogenase (ubiquinone) activity	7/527	41/18432	0.000145113	0.0096355	0.00919558	ND6/ND3/ND1/ND5/ND4/ND2/ND4L	7
GO:0050136	NADH dehydrogenase (quinone) activity	7/527	42/18432	0.000169892	0.0102553	0.00978706	ND6/ND3/ND1/ND5/ND4/ND2/ND4L	7
GO:0003954	NADH dehydrogenase activity	7/527	44/18432	0.000229706	0.0127104	0.0121301	ND6/ND3/ND1/ND5/ND4/ND2/ND4L	7
GO:0003955	NAD(P)H dehydrogenase (quinone) activity	7/527	45/18432	0.000265399	0.0135558	0.0129369	ND6/ND3/ND1/ND5/ND4/ND2/ND4L	7
GO:0015399	primary active transmembrane transporter activity	14/527	169/18432	0.000365567	0.0173383	0.0165467	ND6/ND3/CYTB/COX2/COX1/ND1/ND5/ND4/ND2/COX3/ND4L/ATP6V1B1/ABCC5/ABCC6	14
GO:0019843	rRNA binding	8/527	67/18432	0.000627692	0.0277858	0.0265172	RPL23A/NPM1/RPL12/RPL9/RPL23/RPLP0/RPS18/RPL3	8
GO:0048027	mRNA 5'-UTR binding	5/527	26/18432	0.000749631	0.0311097	0.0296893	RPS7/RPS3A/RPL41/IGF2BP2/MYH10	5
GO:0016655	oxidoreductase activity, acting on NAD(P)H, quinone or similar compound as acceptor	7/527	57/18432	0.00115143	0.0449733	0.04292	ND6/ND3/ND1/ND5/ND4/ND2/ND4L	7

## Sheet: Exvivo GO MF Downregulated
ID	Description	GeneRatio	BgRatio	pvalue	p.adjust	qvalue	geneID	Count
GO:0019003	GDP binding	27/1575	73/18432	1.79022e-11	1.89047e-08	1.71861e-08	RAP2C/RAB2A/RAB5C/GNAI1/KRAS/RAB27A/RAB8B/RAP1A/GNAI3/RAB27B/RAP2A/RAB10/RAB18/RRAGC/RAB9A/ARL8B/PRPS2/RAB14/RAB5A/RAB22A/NRAS/RALA/RAB12/RAB21/RIT1/TRIM23/RASEF	27
GO:0023023	MHC protein complex binding	17/1575	36/18432	1.13057e-09	5.96939e-07	5.42672e-07	CYRIB/B2M/ATP1B1/HLA-DQA1/HLA-DMA/HLA-DMB/HLA-DRB5/HLA-DRA/HLA-DPA1/TAPBPL/HLA-DQB1/CD8A/CD74/HLA-DRB1/HLA-DOA/HLA-DPB1/MS4A1	17
GO:0023026	MHC class II protein complex binding	14/1575	27/18432	7.22663e-09	2.03282e-06	1.84802e-06	B2M/ATP1B1/HLA-DQA1/HLA-DMA/HLA-DMB/HLA-DRB5/HLA-DRA/HLA-DPA1/HLA-DQB1/CD74/HLA-DRB1/HLA-DOA/HLA-DPB1/MS4A1	14
GO:0005525	GTP binding	67/1575	379/18432	7.70007e-09	2.03282e-06	1.84802e-06	RAP2C/RAB2A/RAB5C/ARF4/GNA13/NME1/GNAI1/ARL15/RAB33B/KRAS/UPRT/RAB27A/ARL1/RAB8B/RAP1A/GNAI3/RAB27B/RHOC/EHD3/RAP2A/RAB10/RAB18/RAB11A/ARL5A/RRAGC/AK3/RAB9A/MFHAS1/ARL8B/GCH1/RAB14/RAB5A/RAB22A/GPN3/NRAS/RAB1A/RALA/GTPBP8/SAR1A/RAB12/ARL4C/RAB21/GNL3/RIT1/RNGTT/TRIM23/OPA1/FPGT/RND3/GSPT1/RAB37/ARL5B/RHOBTB3/ATL2/DNM1L/GVINP1/TUBA4A/RP2/RASEF/RHOF/RHOU/SEPTIN6/ARHGAP5/TGM2/RANBP17/GBP2/GBP4	67
GO:0019001	guanyl nucleotide binding	68/1575	401/18432	3.30498e-08	5.81677e-06	5.28797e-06	RAP2C/RAB2A/RAB5C/ARF4/GNA13/NME1/GNAI1/ARL15/RAB33B/KRAS/UPRT/RAB27A/ARL1/RAB8B/RAP1A/GNAI3/RAB27B/RHOC/EHD3/RAP2A/RAB10/RAB18/RAB11A/ARL5A/RRAGC/AK3/RAB9A/MFHAS1/ARL8B/GCH1/PRPS2/RAB14/RAB5A/RAB22A/GPN3/NRAS/RAB1A/RALA/GTPBP8/SAR1A/RAB12/ARL4C/RAB21/GNL3/RIT1/RNGTT/TRIM23/OPA1/FPGT/RND3/GSPT1/RAB37/ARL5B/RHOBTB3/ATL2/DNM1L/GVINP1/TUBA4A/RP2/RASEF/RHOF/RHOU/SEPTIN6/ARHGAP5/TGM2/RANBP17/GBP2/GBP4	68
GO:0032561	guanyl ribonucleotide binding	68/1575	401/18432	3.30498e-08	5.81677e-06	5.28797e-06	RAP2C/RAB2A/RAB5C/ARF4/GNA13/NME1/GNAI1/ARL15/RAB33B/KRAS/UPRT/RAB27A/ARL1/RAB8B/RAP1A/GNAI3/RAB27B/RHOC/EHD3/RAP2A/RAB10/RAB18/RAB11A/ARL5A/RRAGC/AK3/RAB9A/MFHAS1/ARL8B/GCH1/PRPS2/RAB14/RAB5A/RAB22A/GPN3/NRAS/RAB1A/RALA/GTPBP8/SAR1A/RAB12/ARL4C/RAB21/GNL3/RIT1/RNGTT/TRIM23/OPA1/FPGT/RND3/GSPT1/RAB37/ARL5B/RHOBTB3/ATL2/DNM1L/GVINP1/TUBA4A/RP2/RASEF/RHOF/RHOU/SEPTIN6/ARHGAP5/TGM2/RANBP17/GBP2/GBP4	68
GO:0003924	GTPase activity	57/1575	331/18432	2.49778e-07	3.76808e-05	3.42552e-05	RAP2C/RAB2A/RAB5C/ARF4/GNA13/GNAI1/ARL15/RAB33B/KRAS/RAB27A/ARL1/RAB8B/RAP1A/GNAI3/RAB27B/RHOC/RAP2A/RAB10/RAB18/RAB11A/ARL5A/RRAGC/RAB9A/ARHGDIB/ARL8B/GCH1/RAB14/RAB5A/RAB22A/GPN3/NRAS/RAB1A/RALA/SAR1A/RAB12/ARL4C/RAB21/RIT1/TRIM23/OPA1/RND3/GSPT1/RAB37/ARL5B/RHOBTB3/RGS1/ATL2/DNM1L/DDX3X/RASEF/RHOF/RGS10/RHOU/SEPTIN6/ARHGAP5/GBP2/GBP4	57
GO:0003925	G protein activity	15/1575	41/18432	6.62073e-07	8.73936e-05	7.94487e-05	RAP2C/RAB5C/KRAS/RAB27A/RAP1A/RAB27B/RAP2A/RAB10/RAB11A/ARL8B/RAB5A/NRAS/RAB1A/RALA/RIT1	15
GO:0042605	peptide antigen binding	14/1575	37/18432	9.70451e-07	0.000113866	0.000103515	HLA-C/HLA-DQA1/HLA-G/HLA-DRB5/TAP2/HLA-DRA/HLA-B/HLA-DPA1/HLA-DQB1/TAP1/HLA-F/HLA-E/HLA-DRB1/HLA-DPB1	14
GO:0030695	GTPase regulator activity	70/1575	488/18432	1.17016e-05	0.00106083	0.00096439	ARHGAP20/DENND1B/ARF4/AGFG1/WASL/CPEB2/GNA13/RASGRP1/RAP1A/FGD6/TBC1D4/DIS3/LAMTOR3/ARHGDIB/ECT2/ARFGEF2/TBC1D15/ARAP2/RASA2/FAM13B/TBC1D12/RAP1GDS1/ARFGAP3/LAMTOR5/BNIP2/MYCBP2/RIC1/ACAP2/ARHGEF3/TBC1D9/NF1/ARHGAP12/SMAP1/ASAP2/SEC23A/FNIP1/DENND6A/SOS2/ELMOD2/ARHGEF16/ASAP1/CHML/RALGPS2/CHM/RGS1/RAPGEF5/ARHGEF6/DNM1L/ARHGAP29/STXBP5/RP2/SIPA1L2/DENND4A/ALDH1A1/SH3BP1/TBC1D8B/RABGAP1L/GMIP/DOCK1…	70
GO:0060589	nucleoside-triphosphatase regulator activity	70/1575	488/18432	1.17016e-05	0.00106083	0.00096439	ARHGAP20/DENND1B/ARF4/AGFG1/WASL/CPEB2/GNA13/RASGRP1/RAP1A/FGD6/TBC1D4/DIS3/LAMTOR3/ARHGDIB/ECT2/ARFGEF2/TBC1D15/ARAP2/RASA2/FAM13B/TBC1D12/RAP1GDS1/ARFGAP3/LAMTOR5/BNIP2/MYCBP2/RIC1/ACAP2/ARHGEF3/TBC1D9/NF1/ARHGAP12/SMAP1/ASAP2/SEC23A/FNIP1/DENND6A/SOS2/ELMOD2/ARHGEF16/ASAP1/CHML/RALGPS2/CHM/RGS1/RAPGEF5/ARHGEF6/DNM1L/ARHGAP29/STXBP5/RP2/SIPA1L2/DENND4A/ALDH1A1/SH3BP1/TBC1D8B/RABGAP1L/GMIP/DOCK1…	70
GO:0046915	transition metal ion transmembrane transporter activity	13/1575	39/18432	1.20549e-05	0.00106083	0.00096439	SLC39A8/SLC30A1/SLC30A7/TMEM165/MMGT1/ATP7A/SLC30A6/SLC39A14/ATP2C1/SLC25A28/SLC31A2/SLC40A1/SLC31A1	13
GO:0019787	ubiquitin-like protein transferase activity	67/1575	465/18432	1.54677e-05	0.00125645	0.00114223	RBX1/ZNRF2/UBE2Q2/RNF11/UBE2J1/UBE2D1/MIB1/RNF217/UBE2K/RCHY1/UBE2W/BIRC6/UBE2F/RNF139/UBE2G1/UBE2B/ANKIB1/HECTD2/UBE2E1/TRIM7/MARCHF5/FBXO30/LTN1/MEX3C/LONRF1/MYCBP2/RNF138/BIRC2/G2E3/UBA3/CBLL1/FBXL3/ZFP91/BARD1/CUL5/RNF19A/RNF38/RC3H2/UHRF2/RNF103/TRIM33/UBR3/TRIM23/PJA2/CUL3/MALT1/NHLRC3/WWP1/PELI2/UBE4A/LNX2/RNFT1/BIRC3/SMURF2/RNF2/FBXL5/UFL1/FANCL/RNF149/LMO7/RNF19B/RNF114/FBXO11/RNF39/TRIM…	67
GO:0004842	ubiquitin-protein transferase activity	64/1575	441/18432	1.89939e-05	0.00143269	0.00130244	RBX1/ZNRF2/UBE2Q2/RNF11/UBE2J1/UBE2D1/MIB1/RNF217/UBE2K/RCHY1/UBE2W/BIRC6/RNF139/UBE2G1/UBE2B/ANKIB1/HECTD2/UBE2E1/TRIM7/MARCHF5/FBXO30/LTN1/MEX3C/LONRF1/MYCBP2/RNF138/BIRC2/G2E3/CBLL1/FBXL3/ZFP91/BARD1/CUL5/RNF19A/RNF38/RC3H2/UHRF2/RNF103/TRIM33/UBR3/TRIM23/PJA2/CUL3/MALT1/NHLRC3/WWP1/PELI2/UBE4A/LNX2/RNFT1/BIRC3/SMURF2/RNF2/FBXL5/FANCL/RNF149/LMO7/RNF19B/RNF114/FBXO11/RNF39/TRIM22/TRIM31/MYLIP	64
GO:0032395	MHC class II receptor activity	6/1575	10/18432	5.98899e-05	0.00421625	0.00383296	HLA-DQA1/HLA-DRA/HLA-DPA1/HLA-DQB1/HLA-DRB1/HLA-DOA	6
GO:0016791	phosphatase activity	43/1575	276/18432	8.5498e-05	0.00564287	0.00512988	PPP3R1/PPP1R3D/PPP2CA/PPP1CB/BPNT2/PLPP6/PPTC7/CTDSPL2/PPM1B/PPP1CC/IMPA1/PPP3CC/PPP6C/LRRC40/DLG1/PTPN4/STYX/PTP4A1/MTMR6/ARMT1/PIKFYVE/PPM1A/INPP5F/FBP1/RNGTT/PDP1/PPP2R5A/MTMR9/PPA2/PTPN12/PTP4A2/PTPN22/PPM1M/ACP5/SYNJ1/UBLCP1/PPP3CA/LCK/NT5DC2/DUSP6/PTPN7/CTDSPL/ALPL	43
GO:0004721	phosphoprotein phosphatase activity	31/1575	177/18432	9.42638e-05	0.00585545	0.00532313	PPP3R1/PPP1R3D/PPP2CA/PPP1CB/PPTC7/CTDSPL2/PPM1B/PPP1CC/PPP3CC/PPP6C/LRRC40/DLG1/PTPN4/STYX/PTP4A1/MTMR6/PPM1A/RNGTT/PDP1/PPP2R5A/PPA2/PTPN12/PTP4A2/PTPN22/PPM1M/UBLCP1/PPP3CA/LCK/DUSP6/PTPN7/CTDSPL	31
GO:0004722	protein serine/threonine phosphatase activity	21/1575	101/18432	0.000106173	0.00622881	0.00566256	PPP3R1/PPP1R3D/PPP2CA/PPP1CB/PPTC7/CTDSPL2/PPM1B/PPP1CC/PPP3CC/PPP6C/LRRC40/MTMR6/PPM1A/PDP1/PPA2/PPM1M/UBLCP1/PPP3CA/LCK/DUSP6/CTDSPL	21
GO:0106310	protein serine kinase activity	52/1575	363/18432	0.000155031	0.00850473	0.00773157	CDK6/EIF2AK3/STK26/CDK17/PRKAA1/PRKAA2/CAMK2D/RPS6KA3/RIPK2/UHMK1/TAOK1/PRKD3/TLK1/PIK3CB/MAPK8/STK38L/STK17B/PKN2/PRKCH/RIOK3/PIKFYVE/MAP4K3/LATS2/PLK4/NEK7/RIOK2/CDK1/SLK/TBK1/CSNK1G3/PIK3CA/PDIK1L/CDC42BPA/OXSR1/CILK1/TRPM7/SGK1/PIM1/PRKACB/MASTL/ATM/RPS6KA4/STK3/DAPK2/STK39/SRPK1/CLK1/MAPK6/STK17A/MAP4K1/NEK2/PIM3	52
GO:0005096	GTPase activator activity	42/1575	275/18432	0.000161074	0.00850473	0.00773157	ARHGAP20/AGFG1/TBC1D4/ARHGDIB/ECT2/TBC1D15/ARAP2/RASA2/FAM13B/TBC1D12/ARFGAP3/BNIP2/ACAP2/TBC1D9/NF1/ARHGAP12/SMAP1/ASAP2/SEC23A/ELMOD2/ASAP1/CHML/CHM/RGS1/ARHGEF6/DNM1L/ARHGAP29/STXBP5/RP2/SIPA1L2/ALDH1A1/SH3BP1/TBC1D8B/RABGAP1L/GMIP/ARHGAP30/TBC1D10C/CDC42EP2/RGS10/ARHGAP5/TBC1D30/ARHGEF1	42
GO:0000287	magnesium ion binding	36/1575	225/18432	0.000182533	0.00917878	0.00834434	STK26/NME1/GNAI1/ATP11B/ATP11C/RPS6KA3/RAP2A/RRAGC/PPM1B/IMPA1/ATP8B1/PRPS2/NUDT8/STK38L/PGM2/PPM1A/S100P/PGM3/HPRT1/PPA2/GEN1/OPA1/ATP8A1/CDC42BPA/OXSR1/CILK1/IRAK3/RP2/MTHFD2/ME1/PRKACB/RPS6KA4/STK3/ATP10B/SRPK1/NUDT12	36
GO:0015095	magnesium ion transmembrane transporter activity	7/1575	17/18432	0.000296121	0.0142138	0.0129216	MAGT1/NIPA2/MMGT1/SLC41A2/MRS2/ZDHHC17/NIPAL2	7
GO:0004674	protein serine/threonine kinase activity	58/1575	430/18432	0.000338572	0.0150454	0.0136776	CDK6/EIF2AK3/STK26/CDK17/PRKAA1/PRKAA2/CAMK2D/RPS6KA3/RIPK2/TGFBR1/UHMK1/TAOK1/TGFBR2/PRKD3/TLK1/MAPK8/STK38L/CHUK/STK17B/PKN2/CSNK2B/PRKCH/RIOK3/PIKFYVE/MAP4K3/LATS2/CPNE3/PLK4/NEK7/RIOK2/CDK1/SLK/TBK1/CSNK1G3/PIK3CA/PDIK1L/CDC42BPA/OXSR1/CILK1/IRAK3/TRPM7/SGK1/PIM1/PRKACB/MASTL/BMPR1B/ATM/RPS6KA4/STK3/DAPK2/STK39/SRPK1/CLK1/MAPK6/STK17A/MAP4K1/NEK2/PIM3	58
GO:0016757	glycosyltransferase activity	40/1575	267/18432	0.00034194	0.0150454	0.0136776	GALNT7/C1GALT1/GYG1/MGAT4A/GALNT12/GALNT1/TNKS2/STT3B/PARP11/UGCG/GCNT3/GALNT10/ST3GAL4/GALNT3/ALG6/HPRT1/DPY19L4/DPM1/GALNT5/UPP1/C1GALT1C1/B3GNT2/MTAP/PIGA/TMTC3/ALG11/DPY19L3/HAS3/POGLUT3/FUT3/GXYLT1/FUT8/ST3GAL5/FUT6/ST8SIA4/UGGT2/B4GALT5/AGL/LACC1/ST3GAL1	40
GO:0043021	ribonucleoprotein complex binding	27/1575	159/18432	0.000431468	0.0182252	0.0165684	SRP19/CPEB2/NME1/EZH2/EIF6/FMR1/YTHDF3/UHMK1/DERL1/RICTOR/NMD3/SEC61G/RBM3/LTN1/MAIP1/EIF2S1/CPEB4/PHF6/STAU2/CPEB3/DHX29/SRP9/DDX3X/PIM1/SRP72/ABCE1/NAA16	27
GO:0042578	phosphoric ester hydrolase activity	50/1575	365/18432	0.000592087	0.0240478	0.0218617	PPP3R1/PPP1R3D/PPP2CA/PPP1CB/BPNT2/PDE4D/PLPP6/PPTC7/CTDSPL2/PPM1B/PPP1CC/IMPA1/PPP3CC/PPP6C/LRRC40/DLG1/PTPN4/STYX/PTP4A1/MTMR6/ARMT1/PIKFYVE/PPM1A/INPP5F/FBP1/RNGTT/PDP1/PPP2R5A/MTMR9/PPA2/PTPN12/PTP4A2/GPCPD1/PTPN22/PPM1M/ACP5/SYNJ1/UBLCP1/PDE8A/PPP3CA/LCK/NT5DC2/SMPD1/DUSP6/CCR5/PTPN7/CTDSPL/NAPEPLD/GDE1/ALPL	50
GO:0051020	GTPase binding	43/1575	303/18432	0.000673005	0.026322	0.0239291	DENND1B/CDC42SE2/EXOC8/RAP1A/FGD6/CYRIB/RRAGC/RABGGTB/ARHGDIB/ECT2/YIPF1/TNPO1/MARCHF5/GOLGA5/NCKAP1/MYCBP2/PKN2/RIC1/PRKCH/EXOC5/AP3M1/STRN3/ATP7A/SIKE1/BIN1/ARHGEF16/CHML/RHOBTB3/RAB11FIP2/CHM/RANBP9/ATG14/DNM1L/CCDC186/XPO1/PICALM/RABGAP1L/CDC42EP2/FGD4/FMNL3/RANBP17/TBC1D30/ABCA1	43
GO:0005381	iron ion transmembrane transporter activity	5/1575	10/18432	0.000791068	0.0288058	0.0261871	SLC39A8/MMGT1/SLC39A14/SLC25A28/SLC40A1	5
GO:0042608	T cell receptor binding	5/1575	10/18432	0.000791068	0.0288058	0.0261871	HLA-DRA/LCK/CD3E/HLA-E/HLA-DRB1	5
GO:0031267	small GTPase binding	39/1575	272/18432	0.000958431	0.0334173	0.0303793	DENND1B/CDC42SE2/EXOC8/RAP1A/FGD6/CYRIB/RABGGTB/ARHGDIB/ECT2/YIPF1/TNPO1/GOLGA5/NCKAP1/MYCBP2/PKN2/RIC1/PRKCH/EXOC5/AP3M1/STRN3/ATP7A/SIKE1/ARHGEF16/CHML/RHOBTB3/RAB11FIP2/CHM/RANBP9/DNM1L/CCDC186/XPO1/PICALM/RABGAP1L/CDC42EP2/FGD4/FMNL3/RANBP17/TBC1D30/ABCA1	39
GO:1904680	peptide transmembrane transporter activity	6/1575	15/18432	0.000980999	0.0334173	0.0303793	DISP1/SLC15A4/TAP2/ABCC4/TAP1/SLC15A2	6
GO:0019207	kinase regulator activity	36/1575	246/18432	0.00101799	0.0335937	0.0305397	CDKN1B/CCNC/GSKIP/GMFB/CCNT2/CCNG1/KAT2B/TGFA/TAOK1/CCNT1/CASP3/RICTOR/LAMTOR3/IBTK/MOB1A/CSNK2B/NCK1/CCNG2/SOCS4/MALT1/MBIP/PIK3CA/CCNYL1/BCL10/DNAJC3/PRKAR2B/DDX3X/BMPR1B/STK3/MOB1B/SOCS5/ETAA1/CCNO/SFN/CCNB1/WARS1	36
GO:0016758	hexosyltransferase activity	30/1575	195/18432	0.00116064	0.0371406	0.0337642	GALNT7/C1GALT1/GYG1/MGAT4A/GALNT12/GALNT1/STT3B/UGCG/GCNT3/GALNT10/GALNT3/ALG6/DPY19L4/DPM1/GALNT5/C1GALT1C1/B3GNT2/MTAP/PIGA/TMTC3/ALG11/DPY19L3/HAS3/POGLUT3/FUT3/FUT8/FUT6/UGGT2/B4GALT5/AGL	30
GO:0061650	ubiquitin-like protein conjugating enzyme activity	10/1575	40/18432	0.00157873	0.0490334	0.0445758	UBE2Q2/UBE2J1/UBE2D1/UBE2K/UBE2W/BIRC6/UBE2F/UBE2G1/UBE2B/UBE2E1	10

## Sheet: Exvivo GO CC Upregulated
ID	Description	GeneRatio	BgRatio	pvalue	p.adjust	qvalue	geneID	Count
GO:0022626	cytosolic ribosome	39/534	105/19869	2.6625e-34	1.28066e-31	1.09022e-31	RPL7/RPL21/RPS27/RPS7/RPS3A/RPL18A/RPL6/RPS27A/RPL7A/RPS2/RPL10/RPSA/RPL23A/RPL41/RPL12/RPL13A/RPL14/RPL10A/RPL29/RPS25/RPL24/RPL9/RPS15/RPS20/RPL4/RPS28/RPS26/RPS15A/RPL22/RPL27A/RPL23/RPL7L1/RPLP1/RPS8/RPS23/RPL13/RPLP0/RPS18/RPL3	39
GO:0097014	ciliary plasm	41/534	157/19869	5.14518e-29	1.23742e-26	1.05341e-26	BBS5/IFT140/TULP3/CCDC40/DNAH1/TRAF3IP1/HYDIN/DNAH2/CFAP46/DNAH10/CFAP74/RIBC2/IFT172/DNAH3/DNAH9/AK8/INPP5E/DNAAF1/CFAP100/DNAI1/CFAP45/DNAJB13/ODAD1/ODAD4/CCDC96/DNAH11/CFAP61/TEKT2/DNAH5/CFAP52/ODAD3/CFAP73/DZIP1L/DNAI2/GAS8/CCDC113/GABARAP/SPAG17/DYNC2I1/CFAP43/DNHD1	41
GO:0005930	axoneme	40/534	156/19869	5.37256e-28	8.61401e-26	7.33308e-26	BBS5/IFT140/TULP3/CCDC40/DNAH1/TRAF3IP1/HYDIN/DNAH2/CFAP46/DNAH10/CFAP74/RIBC2/IFT172/DNAH3/DNAH9/AK8/INPP5E/DNAAF1/CFAP100/DNAI1/CFAP45/DNAJB13/ODAD1/ODAD4/CCDC96/DNAH11/CFAP61/TEKT2/DNAH5/CFAP52/ODAD3/CFAP73/DZIP1L/DNAI2/GAS8/CCDC113/GABARAP/SPAG17/CFAP43/DNHD1	40
GO:0044391	ribosomal subunit	40/534	188/19869	1.16678e-24	1.40305e-22	1.19442e-22	RPL7/RPL21/RPS27/RPS7/RPS3A/RPL18A/RPL6/RPS27A/RPL7A/RPS2/RPL10/RPSA/RPL23A/RPL41/NPM1/RPL12/RPL13A/RPL14/RPL10A/RPL29/RPS25/RPL24/RPL9/RPS15/RPS20/RPL4/RPS28/RPS26/RPS15A/RPL22/RPL27A/RPL23/RPL7L1/RPLP1/RPS8/RPS23/RPL13/RPLP0/RPS18/RPL3	40
GO:0031514	motile cilium	43/534	244/19869	5.60173e-23	5.38886e-21	4.58752e-21	VDAC2/CROCC/PKD1/IQCA1/DNAH1/DNAH2/EFCAB2/CEP89/DNAH10/IFT172/DNAH3/DNAH9/CFAP99/AK8/CFAP100/DRC7/CFAP65/ODF2/DNAI1/CFAP45/SPACA9/DNAJB13/ODAD4/DNAH11/TTLL1/TCTE1/RSPH1/CFAP61/TEKT2/DNAH5/RPGR/CFAP52/CFAP73/DNAI2/GAS8/IQCG/GABARAP/IFT27/WDR19/SPAG17/CFAP58/CFAP43/DNHD1	43
GO:0032838	plasma membrane bounded cell projection cytoplasm	43/534	246/19869	7.83688e-23	6.28256e-21	5.34833e-21	BBS5/IFT140/TULP3/CCDC40/DNAH1/TRAF3IP1/HYDIN/DNAH2/CFAP46/DNAH10/CFAP74/RIBC2/IFT172/DNAH3/DNAH9/MAP1A/AK8/INPP5E/DNAAF1/CFAP100/DNAI1/CFAP45/DNAJB13/ODAD1/ODAD4/CCDC96/AP3M2/DNAH11/CFAP61/TEKT2/DNAH5/CFAP52/ODAD3/CFAP73/DZIP1L/DNAI2/GAS8/CCDC113/GABARAP/SPAG17/DYNC2I1/CFAP43/DNHD1	43
GO:0022625	cytosolic large ribosomal subunit	24/534	59/19869	1.09218e-22	7.50482e-21	6.38883e-21	RPL7/RPL21/RPL18A/RPL6/RPL7A/RPL10/RPL23A/RPL41/RPL12/RPL13A/RPL14/RPL10A/RPL29/RPL24/RPL9/RPL4/RPL22/RPL27A/RPL23/RPL7L1/RPLP1/RPL13/RPLP0/RPL3	24
GO:0005840	ribosome	40/534	232/19869	4.36269e-21	2.62307e-19	2.23301e-19	RPL7/RPL21/RPS27/RPS7/RPS3A/RPL18A/RPL6/RPS27A/RPL7A/RPS2/RPL10/RPSA/RPL23A/RPL41/NPM1/RPL12/RPL13A/RPL14/RPL10A/RPL29/RPS25/RPL24/RPL9/RPS15/RPS20/RPL4/RPS28/RPS26/RPS15A/RPL22/RPL27A/RPL23/RPL7L1/RPLP1/RPS8/RPS23/RPL13/RPLP0/RPS18/RPL3	40
GO:0099568	cytoplasmic region	43/534	285/19869	2.94341e-20	1.57309e-18	1.33916e-18	BBS5/IFT140/TULP3/CCDC40/DNAH1/TRAF3IP1/HYDIN/DNAH2/CFAP46/DNAH10/CFAP74/RIBC2/IFT172/DNAH3/DNAH9/MAP1A/AK8/INPP5E/DNAAF1/CFAP100/DNAI1/CFAP45/DNAJB13/ODAD1/ODAD4/CCDC96/AP3M2/DNAH11/CFAP61/TEKT2/DNAH5/CFAP52/ODAD3/CFAP73/DZIP1L/DNAI2/GAS8/CCDC113/GABARAP/SPAG17/DYNC2I1/CFAP43/DNHD1	43
GO:0097729	9+2 motile cilium	31/534	165/19869	1.01206e-17	4.868e-16	4.14412e-16	VDAC2/CROCC/DNAH1/DNAH2/EFCAB2/DNAH10/IFT172/DNAH3/DNAH9/AK8/CFAP65/ODF2/DNAI1/CFAP45/SPACA9/DNAJB13/ODAD4/DNAH11/TCTE1/RSPH1/DNAH5/RPGR/CFAP52/DNAI2/GAS8/IQCG/GABARAP/IFT27/CFAP58/CFAP43/DNHD1	31
GO:0015934	large ribosomal subunit	25/534	115/19869	4.1683e-16	1.82268e-14	1.55164e-14	RPL7/RPL21/RPL18A/RPL6/RPL7A/RPL10/RPL23A/RPL41/NPM1/RPL12/RPL13A/RPL14/RPL10A/RPL29/RPL24/RPL9/RPL4/RPL22/RPL27A/RPL23/RPL7L1/RPLP1/RPL13/RPLP0/RPL3	25
GO:0005874	microtubule	47/534	466/19869	6.1766e-15	2.47579e-13	2.10763e-13	TBCA/NUDC/KIF27/TUBA1A/DNAH1/DNAH2/CYP2A6/CSTPP1/CCDC57/DNAH10/TOGARAM2/TPPP/RIBC2/DNAH3/MAPRE3/DNAH9/MAP1A/CSPP1/MAP1LC3A/DNAL4/BCAS3/TTLL5/EML1/TUBG2/EML2/ODF2/DNAI1/CFAP45/SPACA9/DNAH11/TTLL1/SHROOM3/GAS2L1/TEKT2/DYNLL1/DNAH5/TPPP3/CFAP52/DNAI2/GAS8/KIF24/ENKD1/GABARAP/NINL/SPAG17/DCDC1/FAM161A	47
GO:0036064	ciliary basal body	27/534	164/19869	4.02016e-14	1.48746e-12	1.26627e-12	BBS5/RABL2B/IFT140/WHRN/NPHP4/TRAF3IP1/IFT122/FANK1/ARMC9/CFAP157/IFT172/CEP19/MKS1/CFAP100/B9D2/SPACA9/CCDC96/TTLL1/CPLANE2/RPGR/MAPK15/ODAD3/DZIP1L/GAS8/PPP1R32/CCDC113/FAM161A	27
GO:0022627	cytosolic small ribosomal subunit	15/534	45/19869	3.72587e-13	1.2801e-11	1.08975e-11	RPS27/RPS7/RPS3A/RPS27A/RPS2/RPSA/RPS25/RPS15/RPS20/RPS28/RPS26/RPS15A/RPS8/RPS23/RPS18	15
GO:0030286	dynein complex	14/534	54/19869	1.0481e-10	3.36091e-09	2.86113e-09	DNAH1/DNAH2/DNAH10/DNAH3/DNAH9/DNAL4/DNAI1/ODAD1/DNAH11/DYNLL1/DNAH5/DNAI2/DYNC2I1/DNHD1	14
GO:0015935	small ribosomal subunit	16/534	77/19869	1.78616e-10	5.36964e-09	4.57116e-09	RPS27/RPS7/RPS3A/RPS27A/RPS2/RPSA/NPM1/RPS25/RPS15/RPS20/RPS28/RPS26/RPS15A/RPS8/RPS23/RPS18	16
GO:0005858	axonemal dynein complex	9/534	24/19869	6.24379e-09	1.76663e-07	1.50392e-07	DNAH1/DNAH2/DNAH3/DNAH9/DNAI1/ODAD1/DNAH5/DNAI2/DNHD1	9
GO:0036126	sperm flagellum	19/534	150/19869	2.22382e-08	5.94253e-07	5.05886e-07	VDAC2/DNAH1/DNAH2/EFCAB2/IFT172/AK8/CFAP65/ODF2/SPACA9/DNAJB13/TCTE1/RSPH1/RPGR/DNAI2/GAS8/IQCG/GABARAP/IFT27/CFAP58	19
GO:0097542	ciliary tip	11/534	48/19869	4.37994e-08	1.10882e-06	9.43932e-07	IFT140/TRAF3IP1/IFT122/ARMC9/IFT172/IFT43/DYNLL1/ODAD3/IFT27/WDR19/DYNC2I1	11
GO:0005814	centriole	19/534	157/19869	4.6978e-08	1.12982e-06	9.61814e-07	RABL2B/CEP164/CROCC/IFT140/NPHP4/CCDC57/CEP89/ARMC9/CEP19/MKS1/ODF2/CPLANE2/IFT43/MAPK15/ODAD3/DZIP1L/KIF24/CCDC146/CCDC78	19
GO:0042788	polysomal ribosome	9/534	31/19869	8.13905e-08	1.86423e-06	1.58701e-06	RPL18A/RPL6/RPL7A/RPL41/RPL10A/RPL24/RPS28/RPS26/RPS23	9
GO:0005875	microtubule associated complex	19/534	166/19869	1.15476e-07	2.52473e-06	2.14929e-06	KIF27/DNAH1/DNAH2/DNAH10/DNAH3/DNAH9/MAP1A/DNAL4/EML1/EML2/DNAI1/ODAD1/DNAH11/DYNLL1/DNAH5/DNAI2/GABARAP/DYNC2I1/DNHD1	19
GO:0030990	intraciliary transport particle	8/534	24/19869	1.3002e-07	2.71912e-06	2.31478e-06	IFT140/TRAF3IP1/IFT122/IFT172/TTC21A/IFT43/IFT27/WDR19	8
GO:0035869	ciliary transition zone	12/534	71/19869	3.79905e-07	7.61393e-06	6.48171e-06	IFT140/WHRN/NPHP4/TRAF3IP1/IFT122/TMEM231/MKS1/B9D2/CPLANE2/UNC119B/WDR19/FAM161A	12
GO:0098803	respiratory chain complex	13/534	91/19869	9.32447e-07	1.79403e-05	1.52725e-05	ND6/SDHC/ND3/CYTB/COX2/COX1/ND1/ND5/ND4/ND2/COX3/ND4L/WDR93	13
GO:0005746	mitochondrial respirasome	13/534	94/19869	1.36124e-06	2.5183e-05	2.14382e-05	ND6/SDHC/ND3/CYTB/COX2/COX1/ND1/ND5/ND4/ND2/COX3/ND4L/WDR93	13
GO:0030055	cell-substrate junction	30/534	432/19869	2.31168e-06	4.11822e-05	3.50583e-05	RPL7/RPS7/RPS3A/PPIA/RPL6/RPL7A/RPS2/NPM1/RPL12/RPL13A/RPL10A/RPL9/RPS15/RPL4/RPL22/RPL23/RPLP1/RPS8/RPLP0/RPS18/RPL3/CD99/HSPG2/INPP5E/ITGB5/DMD/FAM107A/LAMA3/CD59/NFASC	30
GO:0070469	respirasome	13/534	101/19869	3.10772e-06	5.33863e-05	4.54475e-05	ND6/SDHC/ND3/CYTB/COX2/COX1/ND1/ND5/ND4/ND2/COX3/ND4L/WDR93	13
GO:0097731	9+0 non-motile cilium	15/534	134/19869	3.28021e-06	5.44062e-05	4.63158e-05	IFT140/TULP3/WHRN/NPHP4/IFT122/SHANK2/PDE6B/MERTK/RPGR/PEX6/USH1C/ENKD1/WDR19/VCAN/FAM161A	15
GO:0005881	cytoplasmic microtubule	13/534	102/19869	3.47565e-06	5.57263e-05	4.74396e-05	TUBA1A/CYP2A6/TOGARAM2/RIBC2/MAPRE3/BCAS3/TUBG2/CFAP45/SPACA9/TEKT2/CFAP52/ENKD1/FAM161A	13
GO:0097546	ciliary base	9/534	47/19869	3.75163e-06	5.82108e-05	4.95547e-05	TULP3/NPHP4/TRAF3IP1/FANK1/MOK/SPACA9/CPLANE2/ENKD1/DYNC2I1	9
GO:0036157	outer dynein arm	5/534	11/19869	5.56085e-06	8.35865e-05	7.11569e-05	DNAH9/DNAI1/ODAD1/DNAH5/DNAI2	5
GO:0098800	inner mitochondrial membrane protein complex	16/534	158/19869	5.79466e-06	8.44616e-05	7.19019e-05	ND6/ATP6/SDHC/ND3/CYTB/COX2/COX1/ND1/ATP8/ND5/MTX1/ND4/ND2/COX3/ND4L/WDR93	16
GO:0005844	polysome	10/534	66/19869	9.87213e-06	0.000139662	0.000118893	RPL18A/RPL6/RPL7A/RPL41/RPL10A/RPL24/RPS28/RPS26/RPS23/MYH10	10
GO:0005925	focal adhesion	28/534	422/19869	1.17519e-05	0.000161504	0.000137488	RPL7/RPS7/RPS3A/PPIA/RPL6/RPL7A/RPS2/NPM1/RPL12/RPL13A/RPL10A/RPL9/RPS15/RPL4/RPL22/RPL23/RPLP1/RPS8/RPLP0/RPS18/RPL3/CD99/HSPG2/INPP5E/ITGB5/FAM107A/CD59/NFASC	28
GO:0097730	non-motile cilium	16/534	168/19869	1.2689e-05	0.000169539	0.000144328	IFT140/TULP3/WHRN/NPHP4/IFT122/CEP89/SHANK2/PDE6B/MERTK/RPGR/PEX6/USH1C/ENKD1/WDR19/VCAN/FAM161A	16
GO:0097733	photoreceptor cell cilium	13/534	122/19869	2.50482e-05	0.000325626	0.000277204	IFT140/WHRN/NPHP4/IFT122/SHANK2/PDE6B/MERTK/RPGR/PEX6/USH1C/WDR19/VCAN/FAM161A	13
GO:0005747	mitochondrial respiratory chain complex I	8/534	49/19869	4.41529e-05	0.000530939	0.000451986	ND6/ND3/ND1/ND5/ND4/ND2/ND4L/WDR93	8
GO:0030964	NADH dehydrogenase complex	8/534	49/19869	4.41529e-05	0.000530939	0.000451986	ND6/ND3/ND1/ND5/ND4/ND2/ND4L/WDR93	8
GO:0045271	respiratory chain complex I	8/534	49/19869	4.41529e-05	0.000530939	0.000451986	ND6/ND3/ND1/ND5/ND4/ND2/ND4L/WDR93	8
GO:0005819	spindle	26/534	426/19869	9.6464e-05	0.00113169	0.000963402	NPM1/IK/NUDC/PIN4/CCDC57/CEP89/TOGARAM2/TPPP/CEP19/MAPRE3/CSPP1/DDX11/DNAAF1/EML1/TUBG2/EML2/MICAL3/ODF2/ANKFN1/RSPH1/DYNLL1/CNTRL/MAPK15/DYNC2I1/DCDC1/FAM161A	26
GO:1990204	oxidoreductase complex	12/534	125/19869	0.000140741	0.00161182	0.00137214	ND6/SDHC/ND3/CYTB/COX1/ND1/ND5/ND4/DUOX1/ND2/ND4L/WDR93	12
GO:0120293	dynein axonemal particle	5/534	20/19869	0.000152677	0.00170785	0.00145389	HSP90AB1/RUVBL1/DNAI1/DNAAF10/DNAI2	5
GO:0034451	centriolar satellite	10/534	108/19869	0.00066346	0.00725283	0.00617431	BBS5/CCDC57/CDC42BPG/CCDC13/TMEM63A/CSPP1/IFT43/CNTRL/PLA2G6/CCDC113	10
GO:0019867	outer membrane	16/534	237/19869	0.000714949	0.00764201	0.00650561	RPS27A/VDAC2/FOXO3/SLC24A1/MLXIP/NUTF2/TOMM40/MTX1/ACACB/CLMN/SFXN2/UBB/GK/SYNE1/UBC/AGPAT4	16
GO:0032391	photoreceptor connecting cilium	6/534	41/19869	0.000740652	0.00774465	0.00659299	IFT140/WHRN/NPHP4/IFT122/WDR19/FAM161A	6
GO:0098798	mitochondrial protein-containing complex	18/534	295/19869	0.00110945	0.0113541	0.00966574	ND6/ATP6/SDHC/ND3/CYTB/COX2/COX1/TOMM40/ND1/ATP8/ND5/MTX1/ND4/POLRMT/ND2/COX3/ND4L/WDR93	18
GO:0014069	postsynaptic density	19/534	321/19869	0.00116906	0.0117149	0.00997288	RPL7/RPS27/RPL6/RPL12/RPL14/RPL10A/RPS25/PPP1R9A/RPLP0/RPS18/ND2/NCS1/SHANK2/SYNGAP1/ARHGAP44/DMTN/ADGRL1/FABP5/MPDZ	19
GO:0001750	photoreceptor outer segment	9/534	97/19869	0.00120168	0.0117961	0.010042	IFT140/SHANK2/PDE6B/MERTK/RPGR/PEX6/USH1C/WDR19/VCAN	9
GO:0032279	asymmetric synapse	19/534	327/19869	0.00144876	0.0139371	0.0118646	RPL7/RPS27/RPL6/RPL12/RPL14/RPL10A/RPS25/PPP1R9A/RPLP0/RPS18/ND2/NCS1/SHANK2/SYNGAP1/ARHGAP44/DMTN/ADGRL1/FABP5/MPDZ	19
GO:0031968	organelle outer membrane	15/534	235/19869	0.00180836	0.0170553	0.0145191	RPS27A/VDAC2/FOXO3/MLXIP/NUTF2/TOMM40/MTX1/ACACB/CLMN/SFXN2/UBB/GK/SYNE1/UBC/AGPAT4	15
GO:0097225	sperm midpiece	6/534	50/19869	0.00213567	0.0197549	0.0168173	VDAC2/IFT172/CFAP65/GABARAP/IFT27/CFAP58	6
GO:0099572	postsynaptic specialization	19/534	342/19869	0.00240679	0.021683	0.0184586	RPL7/RPS27/RPL6/RPL12/RPL14/RPL10A/RPS25/PPP1R9A/RPLP0/RPS18/ND2/NCS1/SHANK2/SYNGAP1/ARHGAP44/DMTN/ADGRL1/FABP5/MPDZ	19
GO:0000922	spindle pole	12/534	172/19869	0.00243426	0.021683	0.0184586	NPM1/IK/CEP89/CEP19/CSPP1/DDX11/DNAAF1/EML1/ODF2/CNTRL/DYNC2I1/FAM161A	12
GO:0098984	neuron to neuron synapse	19/534	351/19869	0.00320389	0.0280194	0.0238529	RPL7/RPS27/RPL6/RPL12/RPL14/RPL10A/RPS25/PPP1R9A/RPLP0/RPS18/ND2/NCS1/SHANK2/SYNGAP1/ARHGAP44/DMTN/ADGRL1/FABP5/MPDZ	19
GO:0060170	ciliary membrane	7/534	76/19869	0.00430167	0.0369483	0.0314539	BBS5/IQCE/PKD1/SHANK2/PDE6B/TMEM231/CNGA4	7
GO:0005743	mitochondrial inner membrane	24/534	498/19869	0.00446338	0.0374447	0.0318765	ND6/ATP6/SDHC/ND3/CYTB/COX2/COX1/TOMM40/ND1/ATP8/ND5/MTX1/ND4/SLC27A1/SFXN2/ND2/COQ8B/SLC25A43/COX3/DUSP18/ND4L/SFXN3/FDXR/WDR93	24
GO:0036038	MKS complex	3/534	13/19869	0.00451516	0.0374447	0.0318765	TMEM231/MKS1/B9D2	3
GO:0072687	meiotic spindle	3/534	14/19869	0.00563292	0.0459226	0.0390938	RSPH1/CNTRL/MAPK15	3

## Sheet: Exvivo GO CC Downregulated
ID	Description	GeneRatio	BgRatio	pvalue	p.adjust	qvalue	geneID	Count
GO:0005765	lysosomal membrane	83/1608	418/19869	1.21577e-14	3.99989e-12	3.27619e-12	ZNRF2/RAB2A/RAB5C/CHMP2B/GNAI1/NDUFC2/SLC39A8/ATP6V1G1/TMEM106B/PLEKHF1/ATP11B/ATP11C/NAPG/GNAI3/TMEM30A/AP5M1/BLOC1S1/LAMTOR3/VPS13C/TMEM9B/ARL8B/RAB14/BLOC1S2/SURF4/SCARB2/VAMP7/FNIP2/LAMP2/SLC17A5/MAGT1/OSTM1/LAMTOR5/TMEM165/RAB12/KIF5B/NSF/SEH1L/AP3M1/TAB2/CPNE3/CHMP1B/FNIP1/TRIM23/ATP8A1/VPS13A/CHMP3/RAB37/HPSE/LAPTM4B/AP3B1/HLA-DQA1/LNPEP/LMBRD1/TLR3/LYN/HLA-DMA/SLC39A14/HLA-DMB/LRRC8A/SLC1…	83
GO:0098852	lytic vacuole membrane	83/1608	418/19869	1.21577e-14	3.99989e-12	3.27619e-12	ZNRF2/RAB2A/RAB5C/CHMP2B/GNAI1/NDUFC2/SLC39A8/ATP6V1G1/TMEM106B/PLEKHF1/ATP11B/ATP11C/NAPG/GNAI3/TMEM30A/AP5M1/BLOC1S1/LAMTOR3/VPS13C/TMEM9B/ARL8B/RAB14/BLOC1S2/SURF4/SCARB2/VAMP7/FNIP2/LAMP2/SLC17A5/MAGT1/OSTM1/LAMTOR5/TMEM165/RAB12/KIF5B/NSF/SEH1L/AP3M1/TAB2/CPNE3/CHMP1B/FNIP1/TRIM23/ATP8A1/VPS13A/CHMP3/RAB37/HPSE/LAPTM4B/AP3B1/HLA-DQA1/LNPEP/LMBRD1/TLR3/LYN/HLA-DMA/SLC39A14/HLA-DMB/LRRC8A/SLC1…	83
GO:0005774	vacuolar membrane	88/1608	461/19869	2.14653e-14	4.70806e-12	3.85622e-12	ZNRF2/RAB2A/RAB5C/CHMP2B/GNAI1/NDUFC2/SLC39A8/ATP6V1G1/TMEM106B/PLEKHF1/ATP11B/ATP11C/NAPG/GNAI3/TMEM30A/AP5M1/BLOC1S1/LAMTOR3/VPS13C/TMEM9B/ARL8B/SH3GLB1/RAB14/BLOC1S2/SURF4/SCARB2/VAMP7/FNIP2/LAMP2/SLC17A5/MAGT1/OSTM1/LAMTOR5/TMEM165/RAB12/KIF5B/NSF/SEH1L/TMEM199/AP3M1/TAB2/CPNE3/CHMP1B/FNIP1/TRIM23/ATP8A1/VPS13A/CHMP3/RAB37/HPSE/LAPTM4B/AP3B1/HLA-DQA1/LNPEP/LMBRD1/TLR3/LYN/HLA-DMA/JMY/ATG14/SL…	88
GO:0098791	Golgi apparatus subcompartment	78/1608	387/19869	3.3824e-14	5.56405e-12	4.55734e-12	MOB4/PI4K2B/TMED3/VAMP3/SCAMP1/SGMS1/VCPIP1/ARL1/BPNT2/BET1/MGAT4A/ATP11B/ATP11C/GALNT1/VAMP4/RAB27B/SLC10A7/MAN2A1/SLC30A7/BIRC6/RAB10/RAB11A/ARL5A/RAB9A/GOLGA7/ATP8B1/COG3/TMEM87A/YIPF1/ARFGEF2/RAB14/VAMP7/TMED2/GOLGA5/SCOC/COG5/TRAPPC6B/TMEM165/NSF/RIC1/RAB21/DOP1A/TBC1D23/ST3GAL4/GALNT3/ATP7A/YIPF5/ASAP2/ARFIP1/AP4E1/ATP8A1/PAM/ARL5B/HLA-DQA1/FAM91A1/CHST2/VPS54/RELCH/RHOBTB3/CCDC186/ATP2C1/W…	78
GO:0042611	MHC protein complex	17/1608	25/19869	1.46147e-13	1.9233e-11	1.57531e-11	B2M/HLA-C/HLA-DQA1/HLA-DMA/HLA-DMB/HLA-G/HLA-DRB5/HLA-DRA/HLA-B/HLA-DPA1/HLA-DQB1/CD74/HLA-F/HLA-E/HLA-DRB1/HLA-DOA/HLA-DPB1	17
GO:0030135	coated vesicle	64/1608	310/19869	2.26884e-12	2.48816e-10	2.03798e-10	IER3IP1/DENND1B/KDELR2/FCHO2/TMED7/TMED3/VAMP3/TMED5/SCAMP1/SEC24D/RAB27A/RAB8B/VAMP4/RAB27B/TGFA/RAB14/RAB5A/SEC24A/SCARB2/VAMP7/B2M/TMED2/ERGIC2/GOSR2/SAR1A/CNIH4/CNIH1/TMEM199/ADAM10/INPP5F/ATP7A/LMAN1/YIPF5/COPB1/SCYL2/SNX18/SEC23A/CTSC/HLA-C/AP3B1/HLA-DQA1/LMBRD1/CLINT1/HLA-G/KDELR3/WIPI1/HLA-DRB5/DIPK2A/PIK3C2A/HLA-DRA/PICALM/HLA-B/HLA-DPA1/HLA-DQB1/FZD5/CD3D/STEAP2/TFRC/CD74/HLA-F/HLA-E/HL…	64
GO:0030134	COPII-coated ER to Golgi transport vesicle	31/1608	95/19869	6.40542e-12	6.02109e-10	4.93169e-10	IER3IP1/TMED7/TMED3/TMED5/SEC24D/TGFA/SEC24A/B2M/TMED2/ERGIC2/GOSR2/SAR1A/CNIH4/CNIH1/LMAN1/YIPF5/SEC23A/CTSC/HLA-C/HLA-DQA1/HLA-G/HLA-DRB5/HLA-DRA/HLA-B/HLA-DPA1/HLA-DQB1/CD74/HLA-F/HLA-E/HLA-DRB1/HLA-DPB1	31
GO:0012507	ER to Golgi transport vesicle membrane	24/1608	63/19869	3.74107e-11	2.97574e-09	2.43733e-09	TMED7/SEC24D/TGFA/SEC24A/B2M/TMED2/GOSR2/SAR1A/CNIH1/LMAN1/SEC23A/HLA-C/HLA-DQA1/HLA-G/HLA-DRB5/HLA-DRA/HLA-B/HLA-DPA1/HLA-DQB1/CD74/HLA-F/HLA-E/HLA-DRB1/HLA-DPB1	24
GO:0005802	trans-Golgi network	55/1608	262/19869	4.07016e-11	2.97574e-09	2.43733e-09	PI4K2B/VAMP3/SCAMP1/ARL1/BPNT2/ATP11B/ATP11C/VAMP4/SLC10A7/BIRC6/RAB10/RAB11A/ARL5A/RAB9A/ATP8B1/COG3/YIPF1/ARFGEF2/RAB14/VAMP7/SCOC/COG5/TRAPPC6B/TMEM165/RIC1/RAB21/DOP1A/TBC1D23/ATP7A/YIPF5/ARFIP1/AP4E1/ATP8A1/PAM/ARL5B/HLA-DQA1/FAM91A1/CHST2/VPS54/RELCH/RHOBTB3/CCDC186/ATP2C1/WIPI1/HLA-DRB5/PIK3C2A/HLA-DRA/HLA-DPA1/HLA-DQB1/GSAP/CD74/GRN/HLA-DRB1/ST3GAL1/HLA-DPB1	55
GO:0042613	MHC class II protein complex	12/1608	17/19869	3.20038e-10	2.10585e-08	1.72484e-08	B2M/HLA-DQA1/HLA-DMA/HLA-DMB/HLA-DRB5/HLA-DRA/HLA-DPA1/HLA-DQB1/CD74/HLA-DRB1/HLA-DOA/HLA-DPB1	12
GO:0030666	endocytic vesicle membrane	43/1608	194/19869	9.2456e-10	5.14192e-08	4.21159e-08	VAMP3/WASL/CAMK2D/ATG5/RAB8B/VAMP4/RAB10/TGFA/RAB9A/RAB5A/RAB22A/SCARB2/VAMP7/LAMP2/B2M/PIKFYVE/ATP7A/SNAP23/HLA-C/HLA-DQA1/ATG12/LYN/CD36/HLA-G/HLA-DRB5/TAP2/HLA-DRA/HLA-B/HLA-DPA1/HLA-DQB1/FZD5/TCIRG1/TAP1/CD3D/CORO1A/TLR2/TFRC/CD74/HLA-F/HLA-E/HLA-DRB1/WNT5A/HLA-DPB1	43
GO:0045335	phagocytic vesicle	35/1608	139/19869	9.37737e-10	5.14192e-08	4.21159e-08	VAMP3/ATG5/RAB8B/RAB10/RAB11A/RAB9A/ITGAV/RAB14/RAB5A/RAB22A/VAMP7/LAMP2/B2M/KIF5B/PIKFYVE/STXBP3/ATP7A/APPL1/SNAP23/HLA-C/ATG12/CD36/ATG14/HLA-G/TAP2/HLA-B/ZYX/TCIRG1/CDC42EP2/TAP1/CORO1A/TLR2/HLA-F/HLA-E/ABCA1	35
GO:0005769	early endosome	71/1608	414/19869	1.08264e-09	5.4798e-08	4.48834e-08	PI4K2B/RAB5C/RNF11/VAMP3/AP1AR/PLEKHF1/ATP11B/ATP11C/CD274/RAP1A/VPS26A/EHD3/TMEM30A/BLOC1S1/DERL1/WDFY1/SNX4/TMEM9B/RAB14/RAB5A/RAB22A/EPS15/RAB1A/B2M/SLC9A6/PTP4A1/VPS29/TMEM165/NIPA2/RAB21/PIKFYVE/MON2/MMGT1/AP3M1/INPP5F/ATP7A/APPL1/EEA1/WASHC4/SNX6/CHMP3/SNX16/PTP4A2/LAPTM4B/HLA-C/AP3B1/LNPEP/TLR3/SLC39A14/HLA-G/HAS3/PLEKHF2/SLC15A4/SNX13/ARRDC3/HLA-DRA/PICALM/STEAP4/HLA-B/ATP13A3/RABGAP1L/GP…	71
GO:0030139	endocytic vesicle	62/1608	343/19869	1.51659e-09	7.12798e-08	5.83831e-08	RAB5C/VAMP3/WASL/CAMK2D/ATG5/RAB8B/VAMP4/EHD3/RAB10/RAB11A/TGFA/RAB9A/ITGAV/RAB14/RAB5A/RAB22A/SCARB2/VAMP7/LAMP2/B2M/LPAR1/RALA/KIF5B/PIKFYVE/INPP5F/STXBP3/ATP7A/APPL1/CD2AP/SNAP23/HLA-C/HLA-DQA1/LMBRD1/ATG12/LYN/CD36/ATG14/HLA-G/HLA-DRB5/TAP2/HLA-DRA/PICALM/HLA-B/ZYX/HLA-DPA1/HLA-DQB1/FZD5/TCIRG1/CDC42EP2/TAP1/CD3D/CORO1A/TLR2/TFRC/CD74/HLA-F/HLA-E/HLA-DRB1/AMN/WNT5A/ABCA1/HLA-DPB1	62
GO:0030670	phagocytic vesicle membrane	24/1608	77/19869	4.30571e-09	1.88877e-07	1.54703e-07	VAMP3/ATG5/RAB8B/RAB10/RAB9A/RAB5A/RAB22A/VAMP7/LAMP2/B2M/PIKFYVE/ATP7A/SNAP23/HLA-C/ATG12/HLA-G/TAP2/HLA-B/TCIRG1/TAP1/CORO1A/TLR2/HLA-F/HLA-E	24
GO:0031901	early endosome membrane	40/1608	183/19869	5.40839e-09	2.2242e-07	1.82177e-07	PI4K2B/RAB5C/ATP11B/ATP11C/CD274/TMEM30A/SNX4/TMEM9B/RAB14/RAB5A/EPS15/B2M/SLC9A6/TMEM165/RAB21/PIKFYVE/MON2/MMGT1/INPP5F/ATP7A/APPL1/EEA1/WASHC4/SNX6/SNX16/HLA-C/SLC39A14/HLA-G/PLEKHF2/SLC15A4/SNX13/HLA-DRA/STEAP4/HLA-B/ATP13A3/GPNMB/FZD5/NAPEPLD/HLA-F/HLA-E	40
GO:0030133	transport vesicle	70/1608	423/19869	6.62558e-09	2.56449e-07	2.10049e-07	KDELR2/TMED7/TMED3/VAMP3/SCAMP1/CAV2/AP1AR/SEC24D/RAB27A/BET1/RAB8B/VAMP4/RAB27B/RAB10/MAL2/RAB11A/TMEM30A/TGFA/RAB9A/YKT6/YIPF1/RAB14/RAB5A/SEC24A/SURF4/TMEM168/VAMP7/RAB1A/B2M/SLC17A5/TMED2/GOLGA5/MCTP2/GOSR2/SAR1A/SYPL1/CNIH1/RAB12/BLOC1S6/ATP7A/LMAN1/COPB1/SEC23A/STX3/BIN1/PAM/HLA-C/HLA-DQA1/DNM1L/HLA-G/SYNGR2/STXBP5/KDELR3/PLEKHF2/CD55/HLA-DRB5/HLA-DRA/PICALM/HLA-B/HLA-DPA1/HLA-DQB1/SLC40A1/…	70
GO:0030662	coated vesicle membrane	41/1608	198/19869	1.82286e-08	6.66355e-07	5.45791e-07	KDELR2/TMED7/TMED3/VAMP3/SEC24D/VAMP4/TGFA/RAB5A/SEC24A/SCARB2/VAMP7/B2M/TMED2/GOSR2/SAR1A/CNIH1/TMEM199/LMAN1/COPB1/SEC23A/HLA-C/AP3B1/HLA-DQA1/CLINT1/HLA-G/KDELR3/HLA-DRB5/DIPK2A/HLA-DRA/HLA-B/HLA-DPA1/HLA-DQB1/FZD5/CD3D/TFRC/CD74/HLA-F/HLA-E/HLA-DRB1/WNT5A/HLA-DPB1	41
GO:0005770	late endosome	52/1608	288/19869	3.26127e-08	1.12943e-06	9.25081e-07	CHMP2B/AP1AR/RAB27A/EXOC8/TMEM106B/NDFIP2/RAP1A/RAB27B/RAB11A/TMEM30A/AP5M1/DERL1/RAB9A/LAMTOR3/VPS13C/ARL8B/YIPF1/RAB14/RAB22A/SCARB2/VAMP7/LAMP2/LAMTOR5/GOSR2/VPS29/VPS37A/TMEM165/PIKFYVE/ATP7A/VTA1/CHMP1B/ANKRD13A/IFNAR1/CHMP3/SNX16/VPS37B/LAPTM4B/HLA-DMA/SLC39A14/HLA-DMB/HLA-DRB5/HLA-DRA/ATP13A3/ATP10B/SLC31A2/TCIRG1/SLC31A1/CD74/F2R/VAMP5/GRN/HLA-DRB1	52
GO:0031300	intrinsic component of organelle membrane	67/1608	420/19869	6.02848e-08	1.98337e-06	1.62452e-06	IER3IP1/TRAM1/EIF2AK3/FAR1/SCAMP1/SGMS1/BET1/RAB27B/PLPP6/GHITM/MAL2/ITM2B/WDR83OS/DERL1/GOLGA7/ARL6IP1/RAB5A/LAMP2/B2M/TMEM33/SYPL1/ZMPSTE24/MMGT1/LBR/SEC62/ZDHHC20/FAR2/TIMM17A/STMP1/MCUB/PIGK/LEMD3/HLA-C/HLA-DQA1/CHST2/ACER3/INSIG2/BID/MCU/ELOVL5/HLA-G/LRRC8A/ATP2C1/HACD2/SLC15A4/HLA-DRB5/SAMD8/TAP2/SUN2/HLA-DRA/SLC35A5/HLA-B/ATP10B/HLA-DPA1/HLA-DQB1/SLC35A3/CASD1/TAP1/SLC35A1/STEAP2/CD74/VAMP…	67
GO:0031301	integral component of organelle membrane	63/1608	390/19869	9.35148e-08	2.93013e-06	2.39998e-06	IER3IP1/TRAM1/EIF2AK3/FAR1/SCAMP1/SGMS1/BET1/PLPP6/GHITM/MAL2/ITM2B/WDR83OS/DERL1/ARL6IP1/LAMP2/B2M/TMEM33/SYPL1/ZMPSTE24/MMGT1/LBR/SEC62/ZDHHC20/FAR2/TIMM17A/STMP1/MCUB/PIGK/LEMD3/HLA-C/HLA-DQA1/ACER3/INSIG2/BID/MCU/ELOVL5/HLA-G/LRRC8A/ATP2C1/HACD2/SLC15A4/HLA-DRB5/SAMD8/TAP2/SUN2/HLA-DRA/SLC35A5/HLA-B/ATP10B/HLA-DPA1/HLA-DQB1/SLC35A3/CASD1/TAP1/SLC35A1/STEAP2/CD74/VAMP5/HLA-F/HLA-E/HLA-DRB1/SLC…	63
GO:0071556	integral component of lumenal side of endoplasmic reticulum membrane	13/1608	29/19869	1.20397e-07	3.4444e-06	2.8212e-06	HLA-C/HLA-DQA1/HLA-G/HLA-DRB5/HLA-DRA/HLA-B/HLA-DPA1/HLA-DQB1/CD74/HLA-F/HLA-E/HLA-DRB1/HLA-DPB1	13
GO:0098553	lumenal side of endoplasmic reticulum membrane	13/1608	29/19869	1.20397e-07	3.4444e-06	2.8212e-06	HLA-C/HLA-DQA1/HLA-G/HLA-DRB5/HLA-DRA/HLA-B/HLA-DPA1/HLA-DQB1/CD74/HLA-F/HLA-E/HLA-DRB1/HLA-DPB1	13
GO:0055038	recycling endosome membrane	25/1608	97/19869	1.40161e-07	3.84276e-06	3.14748e-06	RAP2C/VAMP3/SCAMP1/ATP11B/ATP11C/RAB8B/CD274/ABHD17C/EHD3/RAP2A/RAB10/RAB11A/RAB14/B2M/SLC9A6/RAB12/SNX18/HLA-C/RAB11FIP2/HLA-G/HLA-B/ATP13A3/TFRC/HLA-F/HLA-E	25
GO:0005793	endoplasmic reticulum-Golgi intermediate compartment	30/1608	133/19869	2.06677e-07	5.43974e-06	4.45552e-06	RAB2A/TMED7/TMED3/TMED5/BET1/MGAT4A/GALNT1/PALS1/TGFA/YKT6/SURF4/TMED2/ERGIC2/GOSR2/CNIH4/STK17B/CNIH1/MTMR6/TMEM199/MAN1A1/LMAN1/COPB1/ZDHHC20/CTSC/RAB37/CD55/TAP2/GNPNAT1/TAP1/UGGT2	30
GO:0030667	secretory granule membrane	52/1608	313/19869	5.04958e-07	1.27793e-05	1.04671e-05	RAP2C/RAB5C/SCAMP1/CAV2/NDUFC2/CD58/RAB27A/ATP11B/RAP1A/RAB27B/RAB10/RAB18/TMEM30A/ITGAV/LAMTOR3/VPS13C/RAB14/SURF4/CD47/NRAS/VAMP7/LAMP2/TMED2/MAGT1/ADAM10/CPNE3/COPB1/SNAP23/STX3/ATP8A1/TMX3/PAM/RAB37/HLA-C/CD36/ENPP4/STXBP5/SLC15A4/CD55/PHACTR2/TMC6/SVIP/HLA-B/CKAP4/MGST1/GLIPR1/RHOF/TBC1D10C/TCIRG1/ABCC4/TLR2/CEACAM6	52
GO:0031902	late endosome membrane	32/1608	155/19869	6.93985e-07	1.69127e-05	1.38526e-05	CHMP2B/RAB27A/TMEM106B/NDFIP2/RAB27B/TMEM30A/AP5M1/LAMTOR3/VPS13C/ARL8B/YIPF1/SCARB2/VAMP7/LAMP2/LAMTOR5/GOSR2/VPS37A/TMEM165/PIKFYVE/CHMP1B/CHMP3/SNX16/VPS37B/LAPTM4B/HLA-DMA/SLC39A14/HLA-DMB/HLA-DRB5/HLA-DRA/ATP13A3/ATP10B/HLA-DRB1	32
GO:0000151	ubiquitin ligase complex	51/1608	309/19869	7.93976e-07	1.86584e-05	1.52825e-05	RBX1/PCGF5/RNF11/FEM1C/CDKN1B/UBE2D1/BMI1/FEM1B/RNF217/SPOPL/RCHY1/DERL1/UBE2B/ANKIB1/FBXL17/UBE2E1/PHC3/CBLL1/FBXW7/FBXO33/FBXL3/BARD1/CUL5/CAND1/WDR26/RNF19A/CRBN/UBR3/CUL3/SEL1L/ENC1/ANAPC13/DCUN1D5/WWP1/OTULIN/CDC27/APPBP2/RANBP9/UBE4A/FBXO45/KLHL24/DCUN1D1/SMURF2/RNF2/FBXL5/LMO7/YPEL5/RNF19B/FBXO11/CDC20/CDC20B	51
GO:0030176	integral component of endoplasmic reticulum membrane	33/1608	164/19869	8.63208e-07	1.95859e-05	1.60422e-05	TRAM1/EIF2AK3/SGMS1/PLPP6/WDR83OS/DERL1/ARL6IP1/B2M/TMEM33/ZMPSTE24/MMGT1/SEC62/PIGK/HLA-C/HLA-DQA1/ACER3/INSIG2/ELOVL5/HLA-G/HACD2/HLA-DRB5/SAMD8/TAP2/HLA-DRA/HLA-B/HLA-DPA1/HLA-DQB1/TAP1/CD74/HLA-F/HLA-E/HLA-DRB1/HLA-DPB1	33
GO:0033116	endoplasmic reticulum-Golgi intermediate compartment membrane	21/1608	80/19869	9.93317e-07	2.17868e-05	1.78449e-05	RAB2A/TMED7/TMED3/TMED5/BET1/GALNT1/PALS1/TGFA/YKT6/SURF4/TMED2/ERGIC2/GOSR2/CNIH1/TMEM199/LMAN1/ZDHHC20/CTSC/CD55/TAP2/TAP1	21
GO:0032588	trans-Golgi network membrane	24/1608	101/19869	1.23315e-06	2.61746e-05	2.14388e-05	VAMP3/SCAMP1/ARL1/BPNT2/VAMP4/RAB9A/COG3/COG5/TMEM165/RIC1/ATP7A/ARFIP1/AP4E1/HLA-DQA1/VPS54/RHOBTB3/HLA-DRB5/HLA-DRA/HLA-DPA1/HLA-DQB1/CD74/HLA-DRB1/ST3GAL1/HLA-DPB1	24
GO:0098576	lumenal side of membrane	13/1608	35/19869	1.65095e-06	3.39477e-05	2.78055e-05	HLA-C/HLA-DQA1/HLA-G/HLA-DRB5/HLA-DRA/HLA-B/HLA-DPA1/HLA-DQB1/CD74/HLA-F/HLA-E/HLA-DRB1/HLA-DPB1	13
GO:0031227	intrinsic component of endoplasmic reticulum membrane	33/1608	172/19869	2.61272e-06	5.20961e-05	4.26703e-05	TRAM1/EIF2AK3/SGMS1/PLPP6/WDR83OS/DERL1/ARL6IP1/B2M/TMEM33/ZMPSTE24/MMGT1/SEC62/PIGK/HLA-C/HLA-DQA1/ACER3/INSIG2/ELOVL5/HLA-G/HACD2/HLA-DRB5/SAMD8/TAP2/HLA-DRA/HLA-B/HLA-DPA1/HLA-DQB1/TAP1/CD74/HLA-F/HLA-E/HLA-DRB1/HLA-DPB1	33
GO:0055037	recycling endosome	36/1608	198/19869	3.46095e-06	6.69795e-05	5.48608e-05	RAP2C/RNF11/VAMP3/SCAMP1/ATP11B/ATP11C/RAB8B/CD274/KCNK1/ABHD17C/EHD3/RAP2A/RAB10/RAB11A/ARFGEF2/RAB14/B2M/SLC9A6/TBC1D12/RAB12/INPP5F/SNX18/DENND6A/HLA-C/FCHSD2/RELCH/VPS50/RAB11FIP2/HLA-G/HLA-B/ATP13A3/SLC31A2/SLC31A1/TFRC/HLA-F/HLA-E	36
GO:0005795	Golgi stack	30/1608	153/19869	4.64216e-06	8.72727e-05	7.14823e-05	MOB4/TMED3/SGMS1/VCPIP1/BET1/MGAT4A/GALNT1/RAB27B/SLC10A7/MAN2A1/SLC30A7/GOLGA7/COG3/TMEM87A/YIPF1/RAB14/TMED2/GOLGA5/NSF/RAB21/ST3GAL4/GALNT3/ASAP2/ATP2C1/HID1/FUT3/FUT8/FUT6/B4GALT5/ST3GAL1	30
GO:0030136	clathrin-coated vesicle	37/1608	211/19869	6.09929e-06	0.000111481	9.1311e-05	DENND1B/FCHO2/VAMP3/SCAMP1/RAB27A/RAB8B/VAMP4/RAB27B/TGFA/RAB14/RAB5A/SCARB2/VAMP7/ADAM10/INPP5F/ATP7A/SCYL2/SNX18/AP3B1/HLA-DQA1/LMBRD1/CLINT1/WIPI1/HLA-DRB5/PIK3C2A/HLA-DRA/PICALM/HLA-DPA1/HLA-DQB1/FZD5/CD3D/STEAP2/TFRC/CD74/HLA-DRB1/WNT5A/HLA-DPB1	37
GO:0045334	clathrin-coated endocytic vesicle	21/1608	90/19869	7.62129e-06	0.000135535	0.000111013	VAMP3/VAMP4/TGFA/RAB5A/SCARB2/VAMP7/INPP5F/HLA-DQA1/LMBRD1/HLA-DRB5/HLA-DRA/PICALM/HLA-DPA1/HLA-DQB1/FZD5/CD3D/TFRC/CD74/HLA-DRB1/WNT5A/HLA-DPB1	21
GO:0030658	transport vesicle membrane	38/1608	222/19869	8.22981e-06	0.000142506	0.000116722	TMED7/SCAMP1/SEC24D/RAB27B/MAL2/TMEM30A/TGFA/RAB5A/SEC24A/VAMP7/RAB1A/B2M/SLC17A5/TMED2/MCTP2/GOSR2/SAR1A/SYPL1/CNIH1/LMAN1/SEC23A/BIN1/PAM/HLA-C/HLA-DQA1/DNM1L/HLA-G/SYNGR2/HLA-DRB5/HLA-DRA/HLA-B/HLA-DPA1/HLA-DQB1/CD74/HLA-F/HLA-E/HLA-DRB1/HLA-DPB1	38
GO:0000775	chromosome, centromeric region	41/1608	250/19869	1.08443e-05	0.000182963	0.000149859	DYNLT3/CHMP2B/PPP2CA/DCTN6/EZH2/BUB3/KAT2B/FMR1/PPP1R12A/ZNF207/FBXO28/CENPX/PPP1CC/SUMO3/SEH1L/UHRF2/PDS5A/PPP2R5A/CHMP1B/SMC4/SMARCE1/SPDL1/PHF6/CHMP3/STAG2/HELLS/SMC5/CENPU/PMF1/XPO1/MAD2L1/SKA2/ZWILCH/MIS18BP1/IKZF1/SEPTIN6/CCNB1/ARID2/NEK2/CDT1/ZWINT	41
GO:0030669	clathrin-coated endocytic vesicle membrane	18/1608	72/19869	1.21746e-05	0.000200272	0.000164037	VAMP3/VAMP4/TGFA/RAB5A/SCARB2/VAMP7/HLA-DQA1/HLA-DRB5/HLA-DRA/HLA-DPA1/HLA-DQB1/FZD5/CD3D/TFRC/CD74/HLA-DRB1/WNT5A/HLA-DPB1	18
GO:0031985	Golgi cisterna	24/1608	120/19869	2.86707e-05	0.000460129	0.000376877	MOB4/TMED3/SGMS1/BET1/GALNT1/SLC10A7/MAN2A1/SLC30A7/COG3/TMEM87A/YIPF1/TMED2/GOLGA5/RAB21/ST3GAL4/GALNT3/ASAP2/ATP2C1/HID1/FUT3/FUT8/FUT6/B4GALT5/ST3GAL1	24
GO:0030663	COPI-coated vesicle membrane	8/1608	18/19869	3.78199e-05	0.000584719	0.000478925	KDELR2/TMED7/TMED3/TMED2/TMEM199/COPB1/KDELR3/DIPK2A	8
GO:0030496	midbody	34/1608	203/19869	3.82111e-05	0.000584719	0.000478925	CHMP2B/GNAI1/CYLD/GNAI3/BIRC6/RAP2A/PPP1CC/ARL8B/ECT2/SH3GLB1/PIK3CB/RALA/CLIC4/TACC1/PKN2/EXOC5/EML4/GNL3/ABRAXAS2/CHMP1B/CDK1/EXOC6/CHMP3/VPS37B/ANLN/CPEB3/TXNDC9/SPAST/TTC19/YPEL5/CELF2/SEPTIN6/NEK2/KATNBL1	34
GO:0035577	azurophil granule membrane	15/1608	58/19869	4.15601e-05	0.0006077	0.000497749	RAB5C/NDUFC2/ATP11B/TMEM30A/SURF4/VAMP7/LAMP2/MAGT1/CPNE3/ATP8A1/RAB37/CKAP4/MGST1/GLIPR1/CEACAM6	15
GO:1903293	phosphatase complex	15/1608	58/19869	4.15601e-05	0.0006077	0.000497749	PPP3R1/PPP1R3D/PPP2CA/PPP1CB/PPP1R12A/PPP1CC/PPP3CC/SHOC2/PPP4R3A/PDP1/PPP2R5A/NCK1/CNEP1R1/PPP3CA/PPP4R2	15
GO:0005766	primary lysosome	28/1608	155/19869	4.57305e-05	0.000640226	0.00052439	RAB5C/NDUFC2/ATP11B/TMEM30A/GGH/LYZ/SURF4/VAMP7/LAMP2/MAGT1/C6orf120/CPNE3/SNAP23/STX3/ATP8A1/NHLRC3/CTSC/RAB37/ACTR2/DNAJC3/CKAP4/MGST1/GLIPR1/AGA/SERPINB3/SDCBP/CEACAM6/GRN	28
GO:0042582	azurophil granule	28/1608	155/19869	4.57305e-05	0.000640226	0.00052439	RAB5C/NDUFC2/ATP11B/TMEM30A/GGH/LYZ/SURF4/VAMP7/LAMP2/MAGT1/C6orf120/CPNE3/SNAP23/STX3/ATP8A1/NHLRC3/CTSC/RAB37/ACTR2/DNAJC3/CKAP4/MGST1/GLIPR1/AGA/SERPINB3/SDCBP/CEACAM6/GRN	28
GO:0000776	kinetochore	29/1608	164/19869	5.06224e-05	0.000693949	0.000568392	DYNLT3/CHMP2B/DCTN6/BUB3/KAT2B/PPP1R12A/ZNF207/FBXO28/CENPX/PPP1CC/SUMO3/SEH1L/CHMP1B/SMARCE1/SPDL1/PHF6/CHMP3/CENPU/PMF1/XPO1/MAD2L1/SKA2/ZWILCH/SEPTIN6/CCNB1/ARID2/NEK2/CDT1/ZWINT	29
GO:0008287	protein serine/threonine phosphatase complex	14/1608	56/19869	0.00011092	0.0014895	0.00122	PPP3R1/PPP1R3D/PPP2CA/PPP1CB/PPP1R12A/PPP1CC/PPP3CC/SHOC2/PPP4R3A/PPP2R5A/NCK1/CNEP1R1/PPP3CA/PPP4R2	14
GO:0005635	nuclear envelope	63/1608	488/19869	0.000149204	0.00193763	0.00158705	ARL6IP6/NXT2/CHMP2B/AGFG1/OSBPL8/ATP11B/DNAJB14/PLPP6/SLC30A1/PGRMC2/LYPLA1/TNKS2/TMPO/TRA2B/SIRT1/GCH1/NUP58/SURF4/PARP11/UBXN4/TMEM33/BNIP2/ATP5MF/MTMR6/SEH1L/LRRC59/ZMPSTE24/LBR/RIF1/SH3BGRL2/CHMP1B/DPY19L4/NUP54/YEATS4/ZBTB1/BIN1/STAU2/CHMP3/XPO4/LEMD3/CNEP1R1/FAM169A/BNIP3L/SPAST/DPY19L3/XPO1/MAD2L1/PLA2G4A/TMC6/FANCL/SUN2/TMC8/NDC1/LMO7/POLR2M/ALG14/AEN/TMEM170A/IL15RA/CREB3L4/NAPEPLD/SDCBP…	63
GO:0000779	condensed chromosome, centromeric region	29/1608	174/19869	0.000150181	0.00193763	0.00158705	DYNLT3/CHMP2B/DCTN6/BUB3/KAT2B/PPP1R12A/ZNF207/FBXO28/CENPX/PPP1CC/SUMO3/SEH1L/CHMP1B/SMARCE1/SPDL1/PHF6/CHMP3/CENPU/PMF1/XPO1/MAD2L1/SKA2/ZWILCH/SEPTIN6/CCNB1/ARID2/NEK2/CDT1/ZWINT	29
GO:0030137	COPI-coated vesicle	8/1608	22/19869	0.000206036	0.00260714	0.00213543	KDELR2/TMED7/TMED3/TMED2/TMEM199/COPB1/KDELR3/DIPK2A	8
GO:0098857	membrane microdomain	45/1608	327/19869	0.000316147	0.00392499	0.00321484	PPP2CA/CAV2/GNAI3/TGFBR1/MAL2/CASP3/LAMTOR3/TGFBR2/RAB5A/LAMP2/PAG1/DLG1/LAMTOR5/BIRC2/PIKFYVE/ATP1B1/ATP7A/HPSE/JAK2/IL6ST/LYN/CD36/BCL10/BIRC3/CD55/SMURF2/PRKAR2B/CXADR/CD2/LCK/CAVIN2/TFPI/ITGA1/ZAP70/RFTN1/CD8A/SDCBP/KCNE3/TLR2/F2R/ADTRP/TNFRSF10A/ABCA1/MS4A1/FAS	45
GO:0005819	spindle	55/1608	426/19869	0.000380732	0.00463929	0.00379989	MZT1/DYNLT3/CHMP2B/DR1/RB1/PPP2CA/FAM83D/KAT2B/CEP350/CYLD/NR3C1/BIRC6/ZNF207/RAB11A/FAM110C/ARL8B/ECT2/TBL1XR1/PTP4A1/EML4/RIF1/LATS2/RASSF1/ABRAXAS2/CHMP1B/PLK4/NEK7/CUL3/CDK1/SPDL1/DCUN1D5/CHMP3/MBIP/STAG2/CDC27/NEDD1/SPAST/MTUS1/TAF1D/MAD2L1/SKA2/YPEL5/RMDN2/ATM/BORA/ZWILCH/CKAP2/POC1B/PTPN7/CDC20/HAUS3/SEPTIN6/CCNB1/NEK2/KATNBL1	55
GO:0098687	chromosomal region	51/1608	388/19869	0.000400943	0.00479674	0.00392886	DYNLT3/CHMP2B/PPP2CA/PPP1CB/DCTN6/EZH2/BUB3/KAT2B/FMR1/PPP1R12A/ZNF207/FBXO28/CENPX/TNKS2/PPP1CC/SUMO3/CDC73/SEH1L/RIF1/UHRF2/PDS5A/PPP2R5A/CHMP1B/ORC5/SMC4/SMARCE1/CDK1/SPDL1/PHF6/CHMP3/STAG2/HELLS/SMC5/CENPU/PMF1/XPO1/NBN/MAD2L1/SMCHD1/SKA2/ATM/ZWILCH/MIS18BP1/IKZF1/SEPTIN6/CCNB1/ARID2/NEK2/CDT1/ZWINT/NABP1	51
GO:1990531	phospholipid-translocating ATPase complex	6/1608	14/19869	0.000473145	0.00555945	0.00455357	ATP11B/ATP11C/TMEM30A/ATP8B1/ATP8A1/ATP10B	6
GO:0045121	membrane raft	44/1608	326/19869	0.000556471	0.00642382	0.00526155	PPP2CA/CAV2/GNAI3/TGFBR1/MAL2/CASP3/LAMTOR3/TGFBR2/RAB5A/PAG1/DLG1/LAMTOR5/BIRC2/PIKFYVE/ATP1B1/ATP7A/HPSE/JAK2/IL6ST/LYN/CD36/BCL10/BIRC3/CD55/SMURF2/PRKAR2B/CXADR/CD2/LCK/CAVIN2/TFPI/ITGA1/ZAP70/RFTN1/CD8A/SDCBP/KCNE3/TLR2/F2R/ADTRP/TNFRSF10A/ABCA1/MS4A1/FAS	44
GO:0005798	Golgi-associated vesicle	17/1608	89/19869	0.000702007	0.00769868	0.00630575	KDELR2/TMED7/TMED3/STK26/RAB8B/RAB27B/ITM2B/RAB14/TMED2/TMEM199/ADAM10/ATP7A/COPB1/ZDHHC17/KDELR3/DIPK2A/STEAP2	17
GO:0030117	membrane coat	17/1608	89/19869	0.000702007	0.00769868	0.00630575	TMED7/TMED3/SEC24D/AP5M1/SEC24A/EPS15/SAR1A/AP3M1/CHMP1B/COPB1/SEC23A/AP4E1/AP3B1/CLINT1/SYNJ1/DIPK2A/PICALM	17
GO:0048475	coated membrane	17/1608	89/19869	0.000702007	0.00769868	0.00630575	TMED7/TMED3/SEC24D/AP5M1/SEC24A/EPS15/SAR1A/AP3M1/CHMP1B/COPB1/SEC23A/AP4E1/AP3B1/CLINT1/SYNJ1/DIPK2A/PICALM	17
GO:0098562	cytoplasmic side of membrane	30/1608	204/19869	0.00103116	0.011123	0.00911054	GNA13/GNAI1/CAV2/KRAS/CYLD/GNAI3/BLOC1S1/RAB5A/BLOC1S2/DLG1/PTPN4/CHUK/PTP4A1/BIRC2/RAB21/SAMD12/SNX18/LYN/YES1/PTPN22/RGS1/CD2/PPP3CA/LCK/PTPN7/EPM2AIP1/ZAP70/PTK6/TRAF5/BORCS7	30
GO:0031228	intrinsic component of Golgi membrane	14/1608	69/19869	0.00109563	0.0116279	0.00952402	IER3IP1/SGMS1/BET1/GOLGA7/ZDHHC20/CHST2/ACER3/ATP2C1/SAMD8/SLC35A5/SLC35A3/CASD1/SLC35A1/STEAP2	14
GO:0031201	SNARE complex	11/1608	48/19869	0.00129573	0.0135332	0.0110846	VAMP3/BET1/NAPG/VAMP4/YKT6/SNX4/VAMP7/GOSR2/SNAP23/STX3/STXBP5	11
GO:0000138	Golgi trans cisterna	5/1608	12/19869	0.00168465	0.0165448	0.0135513	SGMS1/BET1/YIPF1/HID1/ST3GAL1	5
GO:0005797	Golgi medial cisterna	5/1608	12/19869	0.00168465	0.0165448	0.0135513	SLC10A7/MAN2A1/YIPF1/HID1/ST3GAL1	5
GO:0031166	integral component of vacuolar membrane	5/1608	12/19869	0.00168465	0.0165448	0.0135513	LAMP2/LRRC8A/SLC15A4/ATP10B/SLC46A3	5
GO:0031310	intrinsic component of vacuolar membrane	5/1608	12/19869	0.00168465	0.0165448	0.0135513	LAMP2/LRRC8A/SLC15A4/ATP10B/SLC46A3	5
GO:0120111	neuron projection cytoplasm	16/1608	90/19869	0.00218226	0.0211166	0.0172959	ABHD13/FMR1/RAB27B/UHMK1/BLOC1S1/ARL8B/BLOC1S2/KIF5B/RAB21/BLOC1S6/AP3M1/OPA1/HIF1A/STAU2/AP3B1/SPAST	16
GO:1990124	messenger ribonucleoprotein complex	5/1608	13/19869	0.00255617	0.0243763	0.0199658	CPEB2/FMR1/CPEB4/STAU2/CPEB3	5
GO:0000803	sex chromosome	8/1608	31/19869	0.00263804	0.0247976	0.0203109	PCGF5/UBE2B/SUZ12/BIRC2/PLK4/SMC5/RNF2/SMCHD1	8
GO:0032580	Golgi cisterna membrane	16/1608	92/19869	0.00275136	0.0254986	0.0208851	MOB4/TMED3/GALNT1/COG3/TMEM87A/TMED2/RAB21/ST3GAL4/GALNT3/ASAP2/ATP2C1/FUT3/FUT8/FUT6/B4GALT5/ST3GAL1	16
GO:0140534	endoplasmic reticulum protein-containing complex	20/1608	127/19869	0.00299732	0.0273922	0.0224361	SPTSSA/SPCS3/RNF139/DERL1/SEC61G/ARL6IP1/STT3B/B2M/MAGT1/MMGT1/RINT1/SEL1L/PIGK/PIGA/INSIG2/SRP9/TAP2/ORMDL1/ALG14/TAP1	20
GO:0009898	cytoplasmic side of plasma membrane	25/1608	173/19869	0.00328264	0.0295465	0.0242006	GNA13/GNAI1/CAV2/KRAS/CYLD/GNAI3/DLG1/PTPN4/CHUK/PTP4A1/BIRC2/RAB21/SAMD12/SNX18/LYN/YES1/PTPN22/RGS1/CD2/PPP3CA/LCK/PTPN7/ZAP70/PTK6/TRAF5	25
GO:0070820	tertiary granule	24/1608	164/19869	0.00332286	0.0295465	0.0242006	RAP2C/CD58/GOLGA7/LAMTOR3/GGH/LYZ/RAB14/CD47/NRAS/LAMP2/B2M/ADAM10/STXBP3/ASAH1/COPB1/SNAP23/ENPP4/CD55/TMC6/SVIP/YPEL5/TBC1D10C/TCIRG1/CXCL1	24
GO:0032154	cleavage furrow	11/1608	54/19869	0.00350941	0.0307892	0.0252185	RHOC/RAB11A/PPP1CC/ECT2/RALA/PKN2/RAB21/PLK4/MASTL/SEPTIN6/KATNBL1	11
GO:1904115	axon cytoplasm	12/1608	62/19869	0.00366049	0.0316921	0.025958	RAB27B/BLOC1S1/ARL8B/BLOC1S2/KIF5B/RAB21/BLOC1S6/AP3M1/OPA1/HIF1A/AP3B1/SPAST	12
GO:0042588	zymogen granule	5/1608	14/19869	0.00371341	0.0317328	0.0259914	SCAMP1/GNAI3/RAB27B/TMED2/STX3	5
GO:0005637	nuclear inner membrane	12/1608	63/19869	0.00419592	0.0353964	0.0289921	ARL6IP6/ATP11B/PLPP6/TRA2B/SIRT1/ZMPSTE24/LBR/DPY19L4/LEMD3/FAM169A/DPY19L3/SUN2	12
GO:0030665	clathrin-coated vesicle membrane	20/1608	132/19869	0.00470099	0.0391551	0.0320707	VAMP3/VAMP4/TGFA/RAB5A/SCARB2/VAMP7/AP3B1/HLA-DQA1/CLINT1/HLA-DRB5/HLA-DRA/HLA-DPA1/HLA-DQB1/FZD5/CD3D/TFRC/CD74/HLA-DRB1/WNT5A/HLA-DPB1	20
GO:0030173	integral component of Golgi membrane	12/1608	64/19869	0.00479235	0.0394171	0.0322853	IER3IP1/SGMS1/BET1/ZDHHC20/ACER3/ATP2C1/SAMD8/SLC35A5/SLC35A3/CASD1/SLC35A1/STEAP2	12
GO:0005777	peroxisome	21/1608	142/19869	0.00510757	0.0407548	0.033381	FAR1/MGAT4A/RAB8B/GSTK1/CRAT/ACSL3/ACSL4/FAR2/AGPS/PNPLA8/IDE/ATAD1/DNM1L/ATM/MGST1/ABCD3/NUDT12/RIDA/TMEM135/CRYM/LACC1	21
GO:0042579	microbody	21/1608	142/19869	0.00510757	0.0407548	0.033381	FAR1/MGAT4A/RAB8B/GSTK1/CRAT/ACSL3/ACSL4/FAR2/AGPS/PNPLA8/IDE/ATAD1/DNM1L/ATM/MGST1/ABCD3/NUDT12/RIDA/TMEM135/CRYM/LACC1	21
GO:0061695	transferase complex, transferring phosphorus-containing groups	37/1608	295/19869	0.00515465	0.0407548	0.033381	CDK6/PRKAB1/CCNC/PRKAA1/PRKAA2/CCNT2/CCNG1/TGFBR1/CCNT1/TGFBR2/GTF2A1/PRPS2/CDC73/TENT2/PIK3CB/TAF13/CHUK/POLR1F/CSNK2B/GTF2A2/TAF2/CCNG2/CDK1/SOCS4/TBK1/POLR2K/PIK3CA/ATXN7/ATG14/PRKAR2B/PIK3C2A/PRKACB/TBKBP1/POLR2M/SOCS5/CCNO/CCNB1	37
GO:0030127	COPII vesicle coat	5/1608	15/19869	0.00520275	0.0407548	0.033381	TMED7/SEC24D/SEC24A/SAR1A/SEC23A	5
GO:0032585	multivesicular body membrane	7/1608	28/19869	0.00584267	0.0452292	0.0370458	CHMP2B/RAB27A/NDFIP2/RAB27B/CHMP1B/CHMP3/LAPTM4B	7
GO:1905103	integral component of lysosomal membrane	4/1608	10/19869	0.00603205	0.0461522	0.0378018	LRRC8A/SLC15A4/ATP10B/SLC46A3	4
GO:0000922	spindle pole	24/1608	172/19869	0.00610658	0.0461854	0.037829	PPP2CA/FAM83D/BIRC6/RAB11A/FAM110C/LATS2/RASSF1/ABRAXAS2/PLK4/NEK7/CUL3/SPDL1/STAG2/NEDD1/SPAST/MAD2L1/YPEL5/RMDN2/CKAP2/POC1B/CDC20/CCNB1/NEK2/KATNBL1	24
GO:1902911	protein kinase complex	20/1608	136/19869	0.00658051	0.0492043	0.0403017	CDK6/PRKAB1/CCNC/PRKAA1/PRKAA2/CCNT2/CCNG1/TGFBR1/CCNT1/TGFBR2/CHUK/CSNK2B/CCNG2/CDK1/TBK1/PRKAR2B/PRKACB/TBKBP1/CCNO/CCNB1	20

## Sheet: Invitro Reactome Upregulated
ID	Description	GeneRatio	BgRatio	pvalue	p.adjust	qvalue	geneID	Count
R-HSA-6809371	Formation of the cornified envelope	13/138	130/10899	9.00219e-09	4.5281e-06	4.47267e-06	SPRR1B/SPRR2A/SPRR2D/KRT17/KRT80/KRT6A/SPRR3/EVPL/IVL/PKP2/KRT16/KRT4/KLK12	13
R-HSA-6805567	Keratinization	13/138	214/10899	3.04685e-06	0.000766282	0.000756901	SPRR1B/SPRR2A/SPRR2D/KRT17/KRT80/KRT6A/SPRR3/EVPL/IVL/PKP2/KRT16/KRT4/KLK12	13
R-HSA-9648895	Response of EIF2AK1 (HRI) to heme deficiency	4/138	15/10899	3.01398e-05	0.00505344	0.00499158	CEBPG/ATF4/ATF3/PPP1R15A	4
R-HSA-380994	ATF4 activates genes in response to endoplasmic reticulum stress	4/138	27/10899	0.000344388	0.0410648	0.040562	CEBPG/ATF4/ATF3/EXOSC8	4
R-HSA-8978868	Fatty acid metabolism	9/138	177/10899	0.000408198	0.0410648	0.040562	DBI/SCD/FADS2/ALOXE3/ELOVL6/FADS1/ACOT9/PPARD/HACD2	9

## Sheet: Invitro Reactome Downregulated
ID	Description	GeneRatio	BgRatio	pvalue	p.adjust	qvalue	geneID	Count
R-HSA-1630316	Glycosaminoglycan metabolism	22/327	124/10899	1.35168e-11	1.18542e-08	1.05146e-08	HS3ST3B1/HAS3/CHST14/NAGLU/B3GALT6/HS6ST1/CHST6/CHPF2/B3GNT7/GNS/SLC26A2/GLB1/CHST2/HSPG2/CEMIP/EXT1/HYAL2/ST3GAL2/BGN/B4GAT1/B4GALT7/HS3ST1	22
R-HSA-71387	Metabolism of carbohydrates	30/327	295/10899	4.33475e-09	1.90079e-06	1.68599e-06	HS3ST3B1/MAN2B2/PFKFB3/GNPDA1/HAS3/CHST14/PFKFB4/NAGLU/B3GALT6/HS6ST1/CHST6/CHPF2/B3GNT7/GNS/SLC26A2/GLB1/FBP1/CHST2/HSPG2/CEMIP/FUT11/EXT1/GAA/HYAL2/ST3GAL2/BGN/B4GAT1/B4GALT7/ST6GALNAC6/HS3ST1	30
R-HSA-1474290	Collagen formation	14/327	90/10899	4.17967e-07	9.70303e-05	8.60654e-05	LOXL4/MMP7/LOX/PLOD1/COL9A2/COL18A1/LOXL1/P3H1/CTSB/COL1A2/LOXL2/P3H3/COL5A2/COL16A1	14
R-HSA-5668914	Diseases of metabolism	24/327	249/10899	4.42555e-07	9.70303e-05	8.60654e-05	GGT1/TCN2/CHST14/NAGLU/B3GALT6/CHST6/BTD/THBS2/GNS/SLC26A2/SLC34A2/GLB1/ABCD4/HSPG2/EXT1/GAA/GALNT12/ADA/MUC16/BGN/B4GAT1/B4GALT7/CYP24A1/MMACHC	24
R-HSA-1474244	Extracellular matrix organization	26/327	300/10899	1.13961e-06	0.000199888	0.0001773	CAPN13/LOXL4/MMP7/TGFB3/LOX/LTBP3/PLOD1/COL9A2/COL18A1/LOXL1/EFEMP2/P3H1/CTSB/COL1A2/LOXL2/NID1/P3H3/CAPN12/HSPG2/COL5A2/COL16A1/PTPRS/BGN/LAMB1/FBLN2/LTBP2	26
R-HSA-1638091	Heparan sulfate/heparin (HS-GAG) metabolism	10/327	55/10899	4.53736e-06	0.000620515	0.000550394	HS3ST3B1/NAGLU/B3GALT6/HS6ST1/GLB1/HSPG2/EXT1/BGN/B4GALT7/HS3ST1	10
R-HSA-1566948	Elastic fibre formation	9/327	44/10899	4.9528e-06	0.000620515	0.000550394	LOXL4/TGFB3/LOX/LTBP3/LOXL1/EFEMP2/LOXL2/FBLN2/LTBP2	9
R-HSA-909733	Interferon alpha/beta signaling	11/327	72/10899	8.82624e-06	0.000967577	0.000858236	GBP2/HLA-B/PSMB8/HLA-A/BST2/IFITM1/IFI6/IRF1/MX2/XAF1/MX1	11
R-HSA-2022090	Assembly of collagen fibrils and other multimeric structures	10/327	61/10899	1.19251e-05	0.00116203	0.00103072	LOXL4/MMP7/LOX/COL9A2/COL18A1/LOXL1/CTSB/COL1A2/LOXL2/COL5A2	10
R-HSA-913709	O-linked glycosylation of mucins	10/327	63/10899	1.60259e-05	0.00140547	0.00124665	GALNT11/B3GNT7/ST6GAL1/GALNT14/GALNT10/GALNT12/GALNT18/MUC16/ST3GAL2/B3GNT6	10
R-HSA-3560782	Diseases associated with glycosaminoglycan metabolism	8/327	41/10899	2.42503e-05	0.00193341	0.00171493	CHST14/B3GALT6/CHST6/SLC26A2/HSPG2/EXT1/BGN/B4GALT7	8
R-HSA-5173105	O-linked glycosylation	13/327	111/10899	2.67629e-05	0.00195592	0.00173489	POMGNT2/THBS2/GALNT11/B3GNT7/ST6GAL1/GALNT14/GALNT10/GALNT12/GALNT18/MUC16/ST3GAL2/B4GAT1/B3GNT6	13
R-HSA-1638074	Keratan sulfate/keratin metabolism	7/327	34/10899	5.49145e-05	0.00370461	0.00328598	CHST6/B3GNT7/GNS/GLB1/CHST2/ST3GAL2/B4GAT1	7
R-HSA-2243919	Crosslinking of collagen fibrils	5/327	18/10899	0.000146386	0.00917001	0.00813375	LOXL4/LOX/LOXL1/COL1A2/LOXL2	5
R-HSA-913531	Interferon Signaling	16/327	200/10899	0.000341429	0.0189475	0.0168063	UBA7/GBP2/HLA-B/PSMB8/HLA-A/BST2/HLA-DRB1/IFITM1/IFI6/IRF1/IFI30/B2M/MX2/UBE2L6/XAF1/MX1	16
R-HSA-3781865	Diseases of glycosylation	13/327	143/10899	0.000360993	0.0189475	0.0168063	CHST14/B3GALT6/CHST6/THBS2/SLC26A2/GLB1/HSPG2/EXT1/GALNT12/MUC16/BGN/B4GAT1/B4GALT7	13
R-HSA-8957275	Post-translational protein phosphorylation	11/327	108/10899	0.000385807	0.0189475	0.0168063	CP/SERPINA1/C3/APOE/CSF1/TGOLN2/APOL1/MELTF/IGFBP4/IGFBP3/LAMB1	11
R-HSA-4085001	Sialic acid metabolism	6/327	33/10899	0.000388888	0.0189475	0.0168063	NPL/GLB1/ST6GAL1/ST6GALNAC1/ST3GAL2/ST6GALNAC6	6
R-HSA-977606	Regulation of Complement cascade	7/327	47/10899	0.000459541	0.0212115	0.0188145	CFI/SERPING1/C1S/C1R/CFH/C3/CFB	7
R-HSA-977225	Amyloid fiber formation	11/327	111/10899	0.000488698	0.0214294	0.0190078	H2BC4/APOE/H2BC12/H2BC5/H2BC11/HSPG2/B2M/SORL1/H4C11/UBE2L6/H4C8	11
R-HSA-9006931	Signaling by Nuclear Receptors	20/327	299/10899	0.000683766	0.0285554	0.0253285	H2BC4/MMP7/RDH10/DHRS9/APOD/ARL4C/APOE/H2BC12/H2BC5/PIK3R3/TFF3/H2BC11/DHRS3/MYLIP/PDK2/H4C11/RARB/ABCA1/PLTP/H4C8	20
R-HSA-1650814	Collagen biosynthesis and modifying enzymes	8/327	67/10899	0.000841401	0.0335413	0.029751	PLOD1/COL9A2/COL18A1/P3H1/COL1A2/P3H3/COL5A2/COL16A1	8
R-HSA-1474228	Degradation of the extracellular matrix	12/327	140/10899	0.00101876	0.0388456	0.0344559	CAPN13/MMP7/COL9A2/COL18A1/CTSB/COL1A2/NID1/CAPN12/HSPG2/COL5A2/COL16A1/LAMB1	12
R-HSA-2022854	Keratan sulfate biosynthesis	5/327	28/10899	0.00131242	0.0463417	0.0411048	CHST6/B3GNT7/CHST2/ST3GAL2/B4GAT1	5
R-HSA-381426	Regulation of Insulin-like Growth Factor (IGF) transport and uptake by Insulin-like Growth Factor Binding Proteins (IGFBPs)	11/327	125/10899	0.00132103	0.0463417	0.0411048	CP/SERPINA1/C3/APOE/CSF1/TGOLN2/APOL1/MELTF/IGFBP4/IGFBP3/LAMB1	11
R-HSA-1236974	ER-Phagosome pathway	9/327	90/10899	0.00147318	0.0496914	0.044076	CD14/HLA-B/PSMB8/HLA-A/TLR2/CD36/PSMB9/B2M/PSMB10	9

[truncated: 7 more sheets: Invitro GO BP Upregulated, Invitro GO BP Downregulated, Invitro GO MF Upregulated, Invitro GO MF Downregulated, Invitro GO CC Upregulated, Invitro GO CC Downregulated, Pathways Common to Exvivo and ]
