# Supplementary material for: Transcriptomic analysis of primary nasal epithelial cells reveals altered interferon signalling in preterm birth survivors at one year of age
Source: Front Cell Dev Biol. 2024 Jul 24;12:1399005. doi: 10.3389/fcell.2024.1399005 (PMC11303191; doi:10.3389/fcell.2024.1399005)
Supplement: Supplementary file 6 [file Table1.XLSX]

## Sheet: Exvivo Upregulated
ENSEMBL	ENTREZID	SYMBOL	logFC	AveExpr	P.Value	adj.P.Val
ENSG00000147604	6129	RPL7	5.80575	4.95449	5.00894e-18	5.39463e-14
ENSG00000177954	6232	RPS27	5.66515	5.14921	2.17341e-16	5.8519e-13
ENSG00000099725	5616	PRKY	5.66085	0.761101	0.0161338	0.0478944
ENSG00000122026	6144	RPL21	5.31608	4.52529	1.26898e-17	6.83344e-14
ENSG00000233927	6234	RPS28	4.31362	5.44116	5.23013e-07	6.84833e-05
ENSG00000145425	6189	RPS3A	4.29388	5.49803	1.06244e-15	1.65716e-12
ENSG00000163682	6133	RPL9	4.29041	6.07095	6.95104e-08	1.52889e-05
ENSG00000197728	6231	RPS26	3.76649	4.12541	6.54761e-07	7.92334e-05
ENSG00000130433	59285	CACNG6	3.74627	3.53795	0.00437813	0.0189825
ENSG00000105640	6142	RPL18A	3.57458	5.66636	1.07708e-15	1.65716e-12
ENSG00000156508	1915	EEF1A1	3.38516	9.5013	2.53671e-17	9.10677e-14
ENSG00000086289	54749	EPDR1	3.22817	2.93762	7.87986e-06	0.000305274
ENSG00000100764	5700	PSMC1	3.21214	3.38954	8.3906e-11	3.76528e-08
ENSG00000171903	57834	CYP4F11	3.20441	3.94131	0.00129737	0.00815101
ENSG00000215018	340267	COL28A1	3.15345	3.77815	0.00690269	0.0260941
ENSG00000198695	4541	ND6	3.10835	5.79176	4.58744e-07	6.38433e-05
ENSG00000198848	1066	CES1	3.00157	7.09889	0.000492026	0.00424269
ENSG00000171863	6201	RPS7	2.96969	6.19501	3.76839e-16	8.11711e-13
ENSG00000229117	6171	RPL41	2.65753	5.31749	9.09371e-12	4.89696e-09
ENSG00000255974	1548	CYP2A6	2.50538	4.13841	0.00122834	0.00783719
ENSG00000184500	5627	PROS1	2.45772	3.8053	0.00875588	0.0308496
ENSG00000100012	266629	SEC14L3	2.38931	4.60066	0.00699771	0.0263515
ENSG00000111752	1911	PHC1	2.36207	3.48237	1.92972e-08	5.329e-06
ENSG00000176381	285800	PRR18	2.28331	3.2085	0.00186204	0.0104015
ENSG00000143947	6233	RPS27A	2.26678	7.26356	2.15788e-14	2.32404e-11
ENSG00000237232	150142	ZNF295-AS1	2.19408	2.89412	0.0108505	0.0359126
ENSG00000232112	51372	TMA7	2.18735	4.31072	2.06746e-09	6.36186e-07
ENSG00000197565	1288	COL4A6	2.18303	3.41272	0.00125177	0.00795753
ENSG00000232677	100506930	LINC00665	2.0766	2.84512	0.000259141	0.00274699
ENSG00000140988	6187	RPS2	2.0705	7.48668	4.2338e-13	3.20476e-10
ENSG00000089009	6128	RPL6	2.05519	6.81249	5.87216e-15	7.02702e-12
ENSG00000153930	162282	ANKFN1	2.01421	4.00846	0.00822234	0.0295675
ENSG00000135486	3178	HNRNPA1	1.97587	7.36218	1.25566e-13	1.04027e-10
ENSG00000170324	143162	FRMPD2	1.95366	5.41751	0.0049646	0.0207484
ENSG00000142959	266675	BEST4	1.9443	5.44809	0.00537203	0.0219243
ENSG00000116032	116444	GRIN3B	1.94033	4.45969	0.00636689	0.0246748
ENSG00000170231	2172	FABP6	1.93924	4.50452	0.0110333	0.0363198
ENSG00000196262	5478	PPIA	1.93089	6.66653	4.52704e-15	6.09453e-12
ENSG00000148303	6130	RPL7A	1.91838	8.03142	3.89768e-14	3.81619e-11
ENSG00000168028	3921	RPSA	1.86469	7.07722	4.19773e-12	2.57444e-09
ENSG00000183117	64478	CSMD1	1.85643	3.6427	0.00133726	0.0083202
ENSG00000163531	23114	NFASC	1.85166	3.17681	0.0153952	0.0463404
ENSG00000140481	80125	CCDC33	1.84481	5.53791	0.00624636	0.0243303
ENSG00000235703	100272228	EOLA2-DT	1.84257	2.94588	1.903e-05	0.000516255
ENSG00000163083	3625	INHBB	1.82929	4.23587	0.00763871	0.0280017
ENSG00000162598	127795	C1orf87	1.82256	5.29227	0.00966846	0.033099
ENSG00000133665	84332	DYDC2	1.81927	5.12217	0.00973435	0.0332465
ENSG00000182329	100652824	KIAA2012	1.80853	5.68351	0.00483233	0.0203616
ENSG00000167996	2495	FTH1	1.80018	9.32502	6.6867e-07	8.00175e-05
ENSG00000188818	79844	ZDHHC11	1.79582	3.64395	0.000517427	0.00435707
ENSG00000171798	85442	KNDC1	1.79517	5.32178	0.00818383	0.0294683
ENSG00000007174	1770	DNAH9	1.79428	7.61138	0.00254091	0.0130065
ENSG00000231057	91548	NEK2-DT	1.76599	3.19401	0.00981141	0.0333972
ENSG00000188039	284434	NWD1	1.76466	7.77674	0.00231195	0.01213
ENSG00000164687	2171	FABP5	1.7642	3.22001	0.0138898	0.0430361
ENSG00000197958	6136	RPL12	1.76301	7.66946	4.44551e-11	2.17628e-08
ENSG00000189350	165186	TOGARAM2	1.75255	6.28551	0.00175183	0.00999121
ENSG00000171916	654346	LGALS9C	1.74998	3.24841	5.60468e-05	0.000998184
ENSG00000115461	3488	IGFBP5	1.72164	7.19593	0.000536101	0.00444824
ENSG00000228723	101927416	SRGAP3-AS2	1.72107	5.65684	0.0108658	0.0359411
ENSG00000183914	146754	DNAH2	1.70136	6.97946	0.000995765	0.00674914
ENSG00000187514	5757	PTMA	1.70102	8.24218	4.4346e-12	2.57444e-09
ENSG00000243543	140870	WFDC6	1.69756	3.96389	0.00836951	0.0299467
ENSG00000099260	54873	PALMD	1.69495	4.40983	0.00482547	0.0203486
ENSG00000257542	26628	OR7E47P	1.68635	3.64187	0.0148827	0.0452914
ENSG00000197653	196385	DNAH10	1.68329	7.00313	0.00169822	0.00977628
ENSG00000157423	54768	HYDIN	1.67621	7.72383	0.000875907	0.00621444
ENSG00000132259	1262	CNGA4	1.66325	3.81778	0.01178	0.0381335
ENSG00000172824	283848	CES4A	1.66238	6.32515	0.000976433	0.00667172
ENSG00000114942	1933	EEF1B2	1.65842	5.9083	4.75319e-11	2.22573e-08
ENSG00000166959	83661	MS4A8	1.65776	6.5915	0.00706358	0.0265254
ENSG00000162105	22941	SHANK2	1.65671	4.72323	0.00261378	0.0132597
ENSG00000006611	10083	USH1C	1.65432	4.08525	0.0108877	0.0359805
ENSG00000158486	55567	DNAH3	1.65384	8.06921	0.00215473	0.0116207
ENSG00000258334	101927267	TROAP-AS1	1.65114	4.64849	0.00418046	0.0183979
ENSG00000157703	136306	SVOPL	1.64538	4.52729	0.000142747	0.00181331
ENSG00000074416	11343	MGLL	1.6449	6.84635	9.43308e-05	0.0014013
ENSG00000233730	105378916	LINC01765	1.64026	2.99839	0.00487223	0.0204577
ENSG00000079974	11158	RABL2B	1.62831	5.89843	0.000217302	0.00241521
ENSG00000175318	196996	GRAMD2A	1.62605	4.74667	0.0094658	0.0326647
ENSG00000160401	286207	CFAP157	1.6226	7.89007	0.00185956	0.0103999
ENSG00000187244	4059	BCAM	1.60958	4.82769	0.000490726	0.00423487
ENSG00000166596	146845	CFAP52	1.5878	6.17019	0.00965423	0.0330713
ENSG00000058453	9696	CROCC	1.57563	7.19206	0.000243698	0.002628
ENSG00000103740	23205	ACSBG1	1.57499	3.76808	0.014964	0.0454369
ENSG00000241769	100131434	EOLA1-DT	1.573	3.07176	3.06564e-05	0.000692175
ENSG00000171368	11076	TPPP	1.56588	6.08917	0.00198053	0.010894
ENSG00000230873	401236	STMND1	1.55993	4.46234	0.0062918	0.0244719
ENSG00000008226	9940	DLEC1	1.55661	7.84419	0.000853061	0.00610732
ENSG00000079156	114880	OSBPL6	1.54994	5.55211	0.0105528	0.035187
ENSG00000228253	4509	ATP8	1.54533	8.9094	8.49189e-05	0.00130281
ENSG00000147403	6134	RPL10	1.54271	8.25026	4.46346e-13	3.20476e-10
ENSG00000224383	92340	PRR29	1.53638	7.24464	0.0019897	0.0109286
ENSG00000175267	146177	VWA3A	1.53413	7.16961	0.00280098	0.0139338
ENSG00000203666	84288	EFCAB2	1.53175	5.40878	0.00105069	0.00703131
ENSG00000198899	4508	ATP6	1.52885	12.1078	1.50546e-06	0.000126671
ENSG00000121413	65982	ZSCAN18	1.52774	5.76487	0.000471938	0.00412563
ENSG00000119681	4053	LTBP2	1.52077	3.51685	0.00164334	0.00955143
ENSG00000139714	283385	MORN3	1.52011	4.48247	0.00203709	0.0111198
ENSG00000163885	348807	CFAP100	1.51823	6.53722	0.00470103	0.0200515
ENSG00000089101	26074	CFAP61	1.51482	4.69336	0.00855417	0.0303511
ENSG00000115107	55240	STEAP3	1.5125	6.90589	0.00060514	0.00481697
ENSG00000173838	162333	MARCHF10	1.50991	4.36261	0.0146398	0.0447039
ENSG00000010310	2696	GIPR	1.50316	5.94964	0.000658617	0.00510476
ENSG00000128536	222256	CDHR3	1.49787	8.37338	0.012424	0.0396817
ENSG00000142609	85452	CFAP74	1.49775	5.5805	0.00176143	0.0100215
ENSG00000184154	120356739	LRRC51	1.49634	5.84749	0.00504536	0.0209751
ENSG00000149201	60494	CCDC81	1.48439	6.32745	0.00793322	0.0288067
ENSG00000145147	9353	SLIT2	1.48084	3.31875	0.00639003	0.0247378
ENSG00000144134	11159	RABL2A	1.48037	5.26303	0.00154528	0.0091695
ENSG00000168658	200403	VWA3B	1.47834	6.6771	0.0124949	0.0398374
ENSG00000167094	158248	TTC16	1.47762	4.98439	0.00813528	0.0293426
ENSG00000168916	57507	ZNF608	1.47588	4.08824	0.000828188	0.00597827
ENSG00000243710	149465	CFAP57	1.47457	6.08274	0.00586098	0.0232753
ENSG00000140527	56964	WDR93	1.47418	4.23459	0.014676	0.0447889
ENSG00000136367	85446	ZFHX2	1.47195	4.00991	0.00154044	0.00914581
ENSG00000186329	389177	TMEM212	1.47137	4.25509	0.0170942	0.0499606
ENSG00000141519	55036	CCDC40	1.46835	6.67153	0.0005131	0.0043442
ENSG00000154099	123872	DNAAF1	1.46451	8.12956	0.004153	0.0183235
ENSG00000198830	3151	HMGN2	1.46143	6.20261	2.8931e-08	7.59969e-06
ENSG00000187492	389118	CDHR4	1.46125	7.04509	0.00204349	0.0111435
ENSG00000163093	129880	BBS5	1.4611	4.75972	8.38299e-05	0.00130093
ENSG00000181378	255101	CFAP65	1.44855	6.83415	0.00541536	0.022018
ENSG00000142621	114827	FHAD1	1.44138	6.91829	0.00128283	0.00808905
ENSG00000181163	4869	NPM1	1.43886	6.75184	2.03294e-11	1.04261e-08
ENSG00000203780	92565	FANK1	1.43852	6.51272	0.00113061	0.00735752
ENSG00000163597	100507246	SNHG16	1.43635	4.72965	1.68825e-09	5.48579e-07
ENSG00000187726	374407	DNAJB13	1.43633	5.1886	0.00607234	0.0238683
ENSG00000150873	130813	C2orf50	1.43389	3.6177	0.0046338	0.0198591
ENSG00000244607	152206	CCDC13	1.43309	4.79885	0.00292931	0.014373
ENSG00000177508	79191	IRX3	1.42671	5.19223	0.00495383	0.0207169
ENSG00000143816	7483	WNT9A	1.42463	5.15856	0.00331976	0.0156502
ENSG00000160188	89765	RSPH1	1.41786	7.87439	0.00823137	0.0295693
ENSG00000204815	83538	ODAD4	1.41706	6.03184	0.00640438	0.0247583
ENSG00000162804	25992	SNED1	1.41348	4.69714	0.00230397	0.0121102
ENSG00000120055	79946	C10orf95	1.4103	4.76217	0.00593865	0.0234926
ENSG00000203799	221262	CCDC162P	1.40853	3.99272	0.00668164	0.0254787
ENSG00000120051	159686	CFAP58	1.40668	4.59016	0.013948	0.0431667
ENSG00000165695	158067	AK8	1.40284	5.05064	0.002901	0.0142861
ENSG00000105877	8701	DNAH11	1.40106	6.97922	0.00738287	0.027343
ENSG00000185361	126282	TNFAIP8L1	1.39156	7.12751	0.00190133	0.0105717
ENSG00000116151	79906	MORN1	1.39042	5.04402	0.00132595	0.00828586
ENSG00000197748	80217	CFAP43	1.38683	7.24527	0.0158297	0.0472155
ENSG00000093072	51816	ADA2	1.38644	5.69771	0.00370895	0.0169505
ENSG00000198786	4540	ND5	1.38278	12.5948	9.00308e-05	0.00135613
ENSG00000198755	4736	RPL10A	1.38247	7.86789	4.46453e-10	1.65804e-07
ENSG00000198242	6147	RPL23A	1.38086	6.15504	4.54173e-12	2.57444e-09
ENSG00000197168	341676	NEK5	1.37941	4.85008	0.00332185	0.0156502
ENSG00000170959	341019	DCDC1	1.37933	4.90626	0.0148012	0.045116
ENSG00000013573	1663	DDX11	1.37456	4.33691	0.0036762	0.0168478
ENSG00000260259	105371416	LINC02166	1.37381	3.63801	0.00556314	0.0224653
ENSG00000196167	399948	COLCA1	1.36973	6.94955	0.00621107	0.0242551
ENSG00000198003	115948	ODAD3	1.36894	4.67426	0.0103029	0.0345891
ENSG00000243627	388820	SMIM34	1.36802	3.02365	0.00876271	0.0308615
ENSG00000243627	107983987	LOC107983987	1.36802	3.02365	0.00876271	0.0308615
ENSG00000178965	127254	ERICH3	1.3672	7.7911	0.0135436	0.0421817
ENSG00000249715	90342	FER1L5	1.3661	4.42912	0.00667197	0.0254722
ENSG00000186081	3852	KRT5	1.36498	7.29715	0.0012191	0.007806
ENSG00000163041	3020	H3-3A	1.36456	3.99172	0.00187105	0.0104302
ENSG00000170271	10826	FAXDC2	1.35541	5.29262	0.000513255	0.0043442
ENSG00000146221	202500	TCTE1	1.35445	5.42897	0.00755774	0.0278029
ENSG00000092621	26227	PHGDH	1.35341	4.3869	0.000582602	0.00471068
ENSG00000131018	23345	SYNE1	1.35261	7.28308	0.0026695	0.0134474
ENSG00000162244	6159	RPL29	1.3515	7.19871	6.58888e-10	2.2891e-07
ENSG00000158163	199221	DZIP1L	1.35083	6.19134	0.0104007	0.0348116
ENSG00000153208	10461	MERTK	1.34973	3.51643	0.00678068	0.0257867
ENSG00000165115	55582	KIF27	1.34927	5.09351	0.000670785	0.00516764
ENSG00000171811	54777	CFAP46	1.34575	6.47071	0.00157886	0.00929582
ENSG00000168309	11170	FAM107A	1.34143	6.28492	0.00595378	0.0235225
ENSG00000158428	375307	CATIP	1.33769	5.02241	0.0115714	0.0376309
ENSG00000112539	168090	C6orf118	1.3372	5.52742	0.00785248	0.0285617
ENSG00000122735	27019	DNAI1	1.3342	7.13261	0.00542892	0.0220318
ENSG00000185585	169611	OLFML2A	1.32989	4.67589	0.01226	0.0392859
ENSG00000070731	10610	ST6GALNAC2	1.3272	5.88817	0.0020003	0.0109747
ENSG00000142541	23521	RPL13A	1.32497	9.17571	2.47248e-10	1.06514e-07
ENSG00000111450	2054	STX2	1.32457	4.51097	0.00287571	0.014181
ENSG00000105479	93233	ODAD1	1.31549	7.05191	0.00615149	0.0240879
ENSG00000170209	255239	ANKK1	1.30666	3.7372	0.00158247	0.00930815
ENSG00000108830	8153	RND2	1.30629	2.96345	0.00844464	0.0301097
ENSG00000036672	9099	USP2	1.30403	5.08993	0.00668268	0.0254787
ENSG00000184702	5413	SEPTIN5	1.29732	4.33766	0.00920766	0.0320409
ENSG00000172578	89857	KLHL6	1.29649	7.12709	0.0080005	0.0289879
ENSG00000167552	7846	TUBA1A	1.29607	8.73296	0.000766245	0.00565237
ENSG00000165698	11092	SPACA9	1.29445	6.68157	0.00605273	0.023829
ENSG00000021300	58473	PLEKHB1	1.29115	5.80397	0.00919209	0.0320177
ENSG00000115457	3485	IGFBP2	1.28919	7.8014	0.00212397	0.011495
ENSG00000206113	402160	CFAP99	1.28796	4.05653	0.00285032	0.0140881
ENSG00000100380	6767	ST13	1.27832	6.55281	1.5579e-09	5.2433e-07
ENSG00000197208	6583	SLC22A4	1.26843	6.32359	0.00387589	0.0174294
ENSG00000065978	4904	YBX1	1.26593	6.95028	4.33058e-10	1.65804e-07
ENSG00000159588	149483	CCDC17	1.26459	8.67974	0.0129088	0.0408426
ENSG00000248712	283152	CCDC153	1.26411	5.16009	0.00808435	0.029198
ENSG00000186710	387885	CFAP73	1.26246	6.3628	0.0103524	0.034712
ENSG00000250305	57604	TRMT9B	1.25724	5.03079	0.00112326	0.00732311
ENSG00000206077	653082	ZDHHC11B	1.25692	4.15419	0.00988451	0.0335714
ENSG00000171295	126070	ZNF440	1.25588	6.56836	0.000105757	0.00150668
ENSG00000250510	27239	GPR162	1.25511	5.96172	0.0143371	0.0439415
ENSG00000171595	64446	DNAI2	1.25348	6.66075	0.0104014	0.0348116
ENSG00000115268	6209	RPS15	1.25343	6.88798	7.03848e-08	1.52889e-05
ENSG00000087903	5990	RFX2	1.25077	6.2626	0.0021951	0.0117443
ENSG00000118363	9789	SPCS2	1.24795	3.92438	1.33013e-05	0.000415233
ENSG00000213085	25790	CFAP45	1.24715	6.87296	0.00569937	0.0228102
ENSG00000149328	89944	GLB1L2	1.24331	5.5983	0.00277848	0.0138474
ENSG00000102230	9468	PCYT1B	1.2363	4.1061	0.0140153	0.0432878
ENSG00000158528	55607	PPP1R9A	1.23433	3.33311	1.98879e-05	0.000533818
ENSG00000198804	4512	COX1	1.23395	13.9291	3.79345e-05	0.000790242
ENSG00000188735	144404	TMEM120B	1.22957	5.80219	0.00138697	0.00852409
ENSG00000106012	23288	IQCE	1.22758	6.75586	0.000139609	0.00178362
ENSG00000198888	4535	ND1	1.22753	12.6741	6.69013e-05	0.00112281
ENSG00000039139	1767	DNAH5	1.22548	8.3578	0.00909403	0.0318155
ENSG00000063046	1975	EIF4B	1.22455	7.30845	1.73182e-09	5.48579e-07
ENSG00000136383	57538	ALPK3	1.22451	5.00393	0.00163448	0.00952149
ENSG00000159625	84229	DRC7	1.22345	5.59146	0.0051329	0.021262
ENSG00000162148	220004	PPP1R32	1.22308	4.38212	0.010968	0.0361903
ENSG00000136449	84073	MYCBPAP	1.21985	4.5594	0.0140993	0.043453
ENSG00000105519	828	CAPS	1.21925	9.56323	0.0157507	0.0470423
ENSG00000065534	4638	MYLK	1.21866	4.17209	0.0154166	0.0463753
ENSG00000240137	101928085	ERICH6-AS1	1.21582	3.04848	0.0162147	0.0480683
ENSG00000116039	525	ATP6V1B1	1.21558	3.64825	0.0117913	0.0381461
ENSG00000180509	3753	KCNE1	1.21439	6.4015	0.00736293	0.0272851
ENSG00000176029	56673	C11orf16	1.21438	6.25968	0.00254518	0.0130221
ENSG00000169062	65110	UPF3A	1.21176	4.56749	1.68376e-07	2.92485e-05
ENSG00000105072	84167	C19orf44	1.20827	4.04069	0.000396909	0.00365048
ENSG00000163040	90557	CCDC74A	1.20656	5.96776	0.00143027	0.00867666
ENSG00000132517	55065	SLC52A1	1.20626	3.8131	0.00258945	0.0131735
ENSG00000240875	730091	LINC00886	1.2041	3.01046	0.0134134	0.0418731
ENSG00000181085	225689	MAPK15	1.1996	7.27466	0.0099015	0.0336083
ENSG00000162004	124093	CCDC78	1.19518	7.73	0.0169603	0.0497042
ENSG00000038427	1462	VCAN	1.19369	4.22061	0.0151099	0.0457245
ENSG00000166313	322	APBB1	1.19182	4.95497	0.00400263	0.0178355
ENSG00000187535	9742	IFT140	1.19165	6.85476	0.00035134	0.00342747
ENSG00000205084	79583	TMEM231	1.18919	7.0723	0.00364178	0.0167615
ENSG00000170873	9788	MTSS1	1.1873	6.14352	0.00231077	0.01213
ENSG00000198727	4519	CYTB	1.18598	12.795	3.19262e-05	0.000708959
ENSG00000197816	100499483	CCDC180	1.18595	4.20239	0.00336403	0.0157725
ENSG00000196872	343990	CRACDL	1.18463	6.70968	0.00216981	0.0116553
ENSG00000160838	149499	LRRC71	1.18227	5.45928	0.015574	0.04667
ENSG00000133069	9911	TMCC2	1.18042	3.95646	0.00552814	0.0223507
ENSG00000159713	51673	TPPP3	1.18012	9.17505	0.00941614	0.0325769
ENSG00000058085	3918	LAMC2	1.17809	7.55539	8.64638e-05	0.00132087
ENSG00000161249	93099	DMKN	1.17692	5.95689	0.00542244	0.022021
ENSG00000138002	26160	IFT172	1.17677	7.64265	0.00214682	0.0115838
ENSG00000078900	7161	TP73	1.17586	5.8378	0.00935358	0.0324125
ENSG00000165959	79789	CLMN	1.17008	7.38358	0.00116983	0.00754886
ENSG00000166165	1152	CKB	1.16889	7.27468	0.0142208	0.0437205
ENSG00000205542	7114	TMSB4X	1.16723	7.9806	1.68283e-05	0.000482023
ENSG00000129654	2302	FOXJ1	1.16691	8.86386	0.00250628	0.012872
ENSG00000132321	79781	IQCA1	1.16462	5.24687	0.00077965	0.00571602
ENSG00000010361	80199	FUZ	1.16454	5.40043	0.00312563	0.014988
ENSG00000186976	64800	EFCAB6	1.16115	5.08071	0.0115586	0.0376309
ENSG00000162571	254173	TTLL10	1.15979	6.10901	0.00462015	0.0198164
ENSG00000134490	85019	TMEM241	1.15935	3.51597	0.000950719	0.00655102
ENSG00000155761	200162	SPAG17	1.15827	6.47188	0.0127059	0.0403904
ENSG00000146733	5723	PSPH	1.15655	3.77856	0.00994859	0.0337256
ENSG00000110881	41	ASIC1	1.15192	4.67797	0.0013949	0.00854071
ENSG00000165637	7417	VDAC2	1.15139	4.86777	1.99833e-08	5.38051e-06
ENSG00000130413	65975	STK33	1.14391	5.57562	0.0127122	0.0403973
ENSG00000128408	26150	RIBC2	1.14147	4.92086	0.00213895	0.0115529
ENSG00000167065	150290	DUSP18	1.14095	5.37988	0.00309713	0.0149111
ENSG00000100979	5360	PLTP	1.14039	6.76342	0.011175	0.0366823
ENSG00000162543	127733	UBXN10	1.13954	7.89356	0.015983	0.0475627
ENSG00000092850	27285	TEKT2	1.13805	6.38626	0.00892014	0.0313135
ENSG00000113141	3550	IK	1.13637	7.9757	2.6591e-05	0.000638734
ENSG00000147799	80728	ARHGAP39	1.13535	6.26054	0.00224969	0.0119329
ENSG00000226321	728763	CROCC2	1.13445	6.64414	0.00961356	0.0329783
ENSG00000114841	25981	DNAH1	1.13428	7.28452	0.000822628	0.0059501
ENSG00000122642	11328	FKBP9	1.12417	5.3422	1.16986e-06	0.000112495
ENSG00000188846	9045	RPL14	1.11708	7.11497	3.822e-10	1.52455e-07
ENSG00000109265	57482	CRACD	1.11652	4.30114	0.00906896	0.0317574
ENSG00000166963	4130	MAP1A	1.11373	6.91908	0.00272641	0.0136447
ENSG00000166402	7275	TUB	1.10727	4.97626	0.0149618	0.0454369
ENSG00000171314	5223	PGAM1	1.10516	3.73041	2.29734e-06	0.000161715
ENSG00000100271	25809	TTLL1	1.10288	3.52213	0.0074627	0.027544
ENSG00000198712	4513	COX2	1.10263	12.7671	3.52809e-05	0.000755419
ENSG00000100228	9609	RAB36	1.10154	6.83185	0.0043628	0.0189556
ENSG00000185164	283820	NOMO2	1.10121	3.39034	9.98698e-05	0.00144787
ENSG00000185164	102723728	LOC102723728	1.10121	3.39034	9.98698e-05	0.00144787
ENSG00000104218	79848	CSPP1	1.09868	6.32248	0.00342636	0.0159956
ENSG00000102172	6611	SMS	1.09847	5.82893	3.1847e-06	0.000187427
ENSG00000119640	97	ACYP1	1.0982	3.42291	0.00875646	0.0308496
ENSG00000005379	9256	TSPOAP1	1.09786	6.48405	6.16369e-05	0.00105874
ENSG00000168026	199223	TTC21A	1.09514	6.57552	0.0031289	0.0149903
ENSG00000204396	80737	VWA7	1.09334	5.79159	0.00889631	0.0312605
ENSG00000114473	84223	IQCG	1.08924	7.02322	0.0114822	0.0374282
ENSG00000185432	25840	METTL7A	1.0792	7.53465	0.00272472	0.0136447
ENSG00000103021	29070	CCDC113	1.07658	7.10029	0.0112341	0.0368313
ENSG00000171530	6902	TBCA	1.07508	5.19901	5.20686e-06	0.000238629
ENSG00000203499	642574	IQANK1	1.0747	6.4426	8.77035e-06	0.000322378
ENSG00000215252	440270	GOLGA8B	1.07084	4.86438	0.00828782	0.0297236
ENSG00000164237	134147	CMBL	1.06831	3.83283	0.0064045	0.0247583
ENSG00000197580	83875	BCO2	1.06516	3.81171	0.0113839	0.037198
ENSG00000180438	348825	TPRXL	1.06278	3.81923	0.00901613	0.031599
ENSG00000106714	79937	CNTNAP3	1.06173	3.65016	5.85472e-05	0.00103032
ENSG00000111696	51559	NT5DC3	1.06154	3.08174	0.0006607	0.00510821
ENSG00000010626	10233	LRRC23	1.06084	7.84363	0.0145257	0.0444185
ENSG00000213366	2946	GSTM2	1.05853	5.38846	0.00183296	0.0102937
ENSG00000186409	728621	CCDC30	1.04782	4.96975	0.00963035	0.0330105
ENSG00000118181	6230	RPS25	1.04696	6.97815	1.04829e-08	3.05139e-06
ENSG00000173013	257236	CCDC96	1.04459	5.64814	0.00701961	0.0264028
ENSG00000236502	100506108	SIX3-AS1	1.0445	3.28386	0.00295146	0.0144291
ENSG00000148225	114987	WDR31	1.04223	4.98344	0.00391046	0.0175263
ENSG00000198840	4537	ND3	1.04092	11.0485	2.33089e-05	0.000589288
ENSG00000103253	84264	HAGHL	1.0386	5.04208	0.012105	0.0389166
ENSG00000186468	6228	RPS23	1.03275	7.24195	8.35193e-06	0.000315615
ENSG00000196507	85012	TCEAL3	1.03228	3.89147	0.000100104	0.00144787
ENSG00000084764	22924	MAPRE3	1.02796	6.35056	0.00248642	0.0127944
ENSG00000172771	90288	EFCAB12	1.02747	5.96087	0.00913645	0.0318548
ENSG00000198039	10793	ZNF273	1.02452	5.39565	0.0105142	0.0350907
ENSG00000178498	196403	DTX3	1.02211	5.39794	0.00414111	0.0183011
ENSG00000054392	55733	HHAT	1.02065	4.57475	0.00299208	0.0145484
ENSG00000187650	400673	VMAC	1.01345	3.98317	8.00641e-05	0.00125698
ENSG00000198467	7169	TPM2	1.01328	4.7674	0.00735136	0.0272545
ENSG00000196476	140680	C20orf96	1.01267	5.83226	0.00831534	0.0298123
ENSG00000099139	5125	PCSK5	1.01191	4.85645	0.0101726	0.0342939
ENSG00000101460	84557	MAP1LC3A	1.0115	4.61399	0.00343538	0.0160169
ENSG00000107186	8777	MPDZ	1.01042	4.86029	0.0155269	0.0465935
ENSG00000048471	92017	SNX29	1.01012	5.97006	0.000536593	0.00444889
ENSG00000226137	440465	BAIAP2-DT	1.00933	5.07073	0.000486244	0.00420187
ENSG00000156398	118980	SFXN2	1.00684	5.59947	0.0013111	0.00821309
ENSG00000148814	80313	LRRC27	1.00532	4.92303	0.0017524	0.00999121
ENSG00000002586	4267	CD99	1.00259	6.15586	0.000292452	0.00298671
ENSG00000078487	55063	ZCWPW1	1.00129	3.96777	0.00248169	0.0127823
ENSG00000198886	4538	ND4	1.0004	13.4527	0.00025909	0.00274699
ENSG00000090273	10726	NUDC	0.99096	7.36531	8.95906e-05	0.00135139
ENSG00000167600	29785	CYP2S1	0.990415	7.07357	0.000356074	0.00345808
ENSG00000176788	10409	BASP1	0.987719	7.33581	0.000889959	0.00627692
ENSG00000198483	148741	ANKRD35	0.984763	5.73454	0.00763389	0.0279935
ENSG00000149091	8525	DGKZ	0.979846	5.86971	3.2715e-08	8.38907e-06
ENSG00000198947	1756	DMD	0.979778	5.62313	0.00589672	0.0233828
ENSG00000145020	275	AMT	0.976545	4.26	0.000106667	0.00151358
ENSG00000174444	6124	RPL4	0.971431	8.85775	1.58153e-07	2.83884e-05
ENSG00000006534	221	ALDH3B1	0.970135	8.48748	0.0147065	0.0448566
ENSG00000091262	368	ABCC6	0.970099	4.61132	0.0163747	0.0484359
ENSG00000080823	5891	MOK	0.969742	6.11329	0.00340808	0.0159241
ENSG00000198520	339541	ARMH1	0.969093	5.31797	0.0131656	0.0413031
ENSG00000168772	80319	CXXC4	0.968783	3.36733	0.00390476	0.017508
ENSG00000126432	25824	PRDX5	0.966956	9.0279	0.00668226	0.0254787
ENSG00000185989	22821	RASA3	0.962802	4.52452	0.0151612	0.0458402
ENSG00000111879	79632	FAM184A	0.962391	3.8327	0.0155469	0.0466262
ENSG00000008988	6224	RPS20	0.958975	7.81171	7.0979e-08	1.52889e-05
ENSG00000163430	11167	FSTL1	0.952442	6.07643	0.000266818	0.00280081
ENSG00000177989	440836	ODF3B	0.952161	7.60501	0.00511483	0.0212039
ENSG00000026652	56895	AGPAT4	0.951309	4.66762	0.00936773	0.0324297
ENSG00000107819	81855	SFXN3	0.951076	6.81785	0.00610408	0.0239668
ENSG00000205593	414918	DENND6B	0.949952	6.26348	0.00503405	0.0209494
ENSG00000157216	23648	SSBP3	0.946087	5.59178	1.72109e-05	0.000490375
ENSG00000134419	6210	RPS15A	0.943536	5.26688	1.67374e-06	0.000134524
ENSG00000159714	29800	ZDHHC1	0.940073	6.18005	0.0041818	0.0183979
ENSG00000225361	100506599	PPP1R26-AS1	0.934805	3.40164	0.0108079	0.0357938
ENSG00000164674	94120	SYTL3	0.933031	5.55549	0.00298269	0.0145159
ENSG00000133256	5158	PDE6B	0.93226	3.94844	0.00309364	0.0149009
ENSG00000105559	57664	PLEKHA4	0.931843	3.43421	0.00642484	0.0248191
ENSG00000124374	400961	PAIP2B	0.92617	4.15094	0.00307386	0.0148322
ENSG00000185485	255812	SDHAP1	0.926139	3.51625	0.0107313	0.0356582
ENSG00000089091	55184	DZANK1	0.925797	4.67871	0.0047505	0.0201401
ENSG00000163521	79411	GLB1L	0.925708	6.01126	0.00618629	0.024175
ENSG00000185100	122622	ADSS1	0.924329	4.45747	0.0165597	0.0487557
ENSG00000007216	9058	SLC13A2	0.920059	3.95714	0.0120331	0.0387548
ENSG00000144504	51281	ANKMY1	0.919316	6.78652	0.00418499	0.0184044
ENSG00000158062	91544	UBXN11	0.918276	7.67228	0.00216752	0.0116511
ENSG00000198814	2710	GK	0.917096	5.0999	0.00235537	0.0123262
ENSG00000105245	9253	NUMBL	0.91587	3.66573	0.00631327	0.0245377
ENSG00000143891	130589	GALM	0.915406	5.12024	0.00404696	0.0179958
ENSG00000074621	9187	SLC24A1	0.914864	4.38897	3.11395e-05	0.000697241
ENSG00000185513	26013	L3MBTL1	0.913905	4.21389	0.00102762	0.0069172
ENSG00000198763	4536	ND2	0.913628	12.5011	0.00178788	0.0101083
ENSG00000196236	63929	XPNPEP3	0.912136	5.41947	9.66065e-05	0.00142803
ENSG00000104490	83988	NCALD	0.909586	5.38698	0.0129763	0.0409479
ENSG00000066629	2009	EML1	0.909188	5.48409	0.00416926	0.0183802
ENSG00000204104	26146	TRAF3IP1	0.909104	6.94222	0.000857838	0.00613067
ENSG00000184465	253769	WDR27	0.90906	5.39989	0.00157951	0.00929582
ENSG00000172661	253725	WASHC2C	0.907117	4.14452	1.67493e-05	0.000481084
ENSG00000130304	376497	SLC27A1	0.907103	5.75771	0.00075471	0.0055941
ENSG00000172992	79877	DCAKD	0.906958	4.99698	3.04063e-05	0.000689423
ENSG00000163913	55764	IFT122	0.906357	6.32286	0.00105986	0.00707228
ENSG00000100246	10126	DNAL4	0.906077	5.70493	0.00348699	0.0162224
ENSG00000179532	144132	DNHD1	0.905817	5.32546	0.0165968	0.0488515
ENSG00000161513	2232	FDXR	0.904955	5.20056	0.00644984	0.0248799
ENSG00000167595	148137	PROSER3	0.90319	4.79547	4.08651e-05	0.000827288
ENSG00000149179	79096	CSTPP1	0.895607	5.65964	0.00124432	0.00792511
ENSG00000001460	90529	STPG1	0.894091	5.50603	0.0144264	0.0441774
ENSG00000103512	23420	NOMO1	0.893378	5.38906	0.00204192	0.0111406
ENSG00000167526	6137	RPL13	0.892691	8.40779	1.45924e-05	0.000442705
ENSG00000175792	8607	RUVBL1	0.888617	6.63491	0.00386276	0.0173776
ENSG00000239779	23559	WBP1	0.886515	4.67974	0.00318765	0.0151974
ENSG00000130511	170463	SSBP4	0.882386	6.36193	0.00685937	0.0259941
ENSG00000137818	6176	RPLP1	0.878365	8.89724	4.88114e-06	0.00023057
ENSG00000135931	80210	ARMC9	0.877762	4.97424	0.0016341	0.00952149
ENSG00000182749	164091	PAQR7	0.876221	4.17533	0.00628686	0.0244615
ENSG00000124587	5190	PEX6	0.87609	5.50072	0.00980779	0.0333955
ENSG00000240038	280	AMY2B	0.873944	3.67898	0.00982271	0.0334146
ENSG00000084636	1307	COL16A1	0.871889	3.5082	0.00968712	0.0331391
ENSG00000231064	105371450	THBS3-AS1	0.870862	5.40124	0.0145583	0.0444928
ENSG00000134504	284252	KCTD1	0.868571	5.82892	0.00112728	0.00734025
ENSG00000196220	9901	SRGAP3	0.868512	6.38106	0.000564844	0.00459816
ENSG00000166046	255394	TCP11L2	0.866826	4.9702	7.90153e-05	0.00124963
ENSG00000174007	84984	CEP19	0.866485	3.64829	0.002273	0.0120203
ENSG00000130119	54552	GNL3L	0.866426	3.80011	0.000502938	0.00429893
ENSG00000095397	25861	WHRN	0.866118	5.61565	0.000648475	0.0050463
ENSG00000149256	26011	TENM4	0.865599	4.64189	0.00244648	0.0126663
ENSG00000160991	80228	ORAI2	0.860427	6.17542	0.000500357	0.00428026
ENSG00000204323	643008	SMIM5	0.858832	4.84717	0.00473192	0.0201037
ENSG00000159214	149473	CCDC24	0.857847	5.49456	0.00564009	0.0226428
ENSG00000170296	11337	GABARAP	0.857629	3.44269	0.011697	0.0378991
ENSG00000088002	6820	SULT2B1	0.854643	3.60037	0.00418118	0.0183979
ENSG00000161010	51149	MRNIP	0.851218	5.66901	0.00236226	0.0123391
ENSG00000140403	55466	DNAJA4	0.848007	8.33128	0.0142531	0.0437712
ENSG00000116251	6146	RPL22	0.846849	5.98578	1.85146e-06	0.000143455
ENSG00000175711	146712	B3GNTL1	0.84393	3.64374	0.00176416	0.0100317
ENSG00000141376	54828	BCAS3	0.842629	5.6307	0.00353133	0.0164074
ENSG00000143977	6637	SNRPG	0.840933	3.92423	4.51388e-05	0.000868117
ENSG00000163617	57577	CCDC191	0.836588	5.40231	0.0160008	0.0475913
ENSG00000135205	57639	CCDC146	0.833076	7.06671	0.0128113	0.0406055
ENSG00000137857	53905	DUOX1	0.832171	8.3321	0.000349638	0.00341397
ENSG00000170421	3856	KRT8	0.830595	9.88808	8.62864e-05	0.00132004
ENSG00000137261	9856	KIAA0319	0.829947	4.06952	0.00669176	0.0254936
ENSG00000167535	784	CACNB3	0.827412	5.07979	0.00411797	0.0182115
ENSG00000155085	221264	AK9	0.82663	5.57381	0.00701241	0.0263884
ENSG00000187609	54932	EXD3	0.823114	3.96638	0.00120335	0.00772814
ENSG00000135245	29923	HILPDA	0.822943	4.1638	0.0115806	0.0376309
ENSG00000115274	83444	INO80B	0.821735	5.4736	0.000908642	0.00635047
ENSG00000189339	728661	SLC35E2B	0.821723	5.62752	7.88668e-05	0.00124911
ENSG00000122378	84293	PRXL2A	0.820965	5.36182	0.000701275	0.00530761
ENSG00000102309	5303	PIN4	0.820618	3.55364	0.000682833	0.00522637
ENSG00000099797	9524	TECR	0.820518	6.30976	1.16295e-06	0.000112495
ENSG00000188153	1287	COL4A5	0.818443	5.88271	0.0025161	0.012904
ENSG00000184381	8398	PLA2G6	0.817262	4.66285	0.00979015	0.033367
ENSG00000118689	2309	FOXO3	0.816287	5.46915	4.05553e-06	0.000207991
ENSG00000169683	201255	LRRC45	0.811113	5.50092	0.0056391	0.0226428
ENSG00000101104	80336	PABPC1L	0.810243	4.7418	0.000154609	0.00190243
ENSG00000214456	440503	PLIN5	0.809662	4.26639	0.000169638	0.00201954
ENSG00000126870	55112	DYNC2I1	0.808642	6.17281	0.0127757	0.0405404
ENSG00000109944	79864	JHY	0.806726	4.48158	0.0136777	0.042501
ENSG00000178234	63917	GALNT11	0.804939	4.95332	0.00579165	0.0230937
ENSG00000170144	220988	HNRNPA3	0.803207	6.93753	3.90186e-06	0.000203016
ENSG00000238105	55592	GOLGA2P5	0.802618	6.2022	0.00592133	0.0234506
ENSG00000110987	605	BCL7A	0.800251	5.14112	0.0080727	0.02917
ENSG00000125691	9349	RPL23	0.797619	7.90545	3.8912e-06	0.000203016
ENSG00000173598	11163	NUDT4	0.794363	5.16387	0.000896143	0.00630402
ENSG00000231500	6222	RPS18	0.793592	8.56475	2.66288e-05	0.000638734
ENSG00000198938	4514	COX3	0.79114	13.2079	0.00299841	0.014566
ENSG00000114391	6152	RPL24	0.790478	7.21944	5.51619e-08	1.35021e-05
ENSG00000142937	6202	RPS8	0.788664	8.68987	5.82641e-06	0.000249069
ENSG00000171160	118812	MORN4	0.78836	3.15531	0.0136534	0.0424379
ENSG00000129007	91860	CALML4	0.787951	5.58987	0.0103938	0.0348116
ENSG00000156313	6103	RPGR	0.786655	5.64625	0.00960325	0.0329783
ENSG00000173253	10655	DMRT2	0.786257	4.68395	0.00094746	0.00654112
ENSG00000109794	25854	FAM149A	0.786221	5.01971	0.00312704	0.0149881
ENSG00000169230	27166	PRELID1	0.785613	5.4061	3.32646e-06	0.000193654
ENSG00000053747	3909	LAMA3	0.785593	5.22698	0.00881395	0.0310047
ENSG00000116729	79971	WLS	0.785003	6.74576	0.0036127	0.0166704
ENSG00000008710	5310	PKD1	0.784467	6.79166	0.000535137	0.00444688
ENSG00000166441	6157	RPL27A	0.783909	7.84939	1.92764e-06	0.000145351
ENSG00000124074	84080	ENKD1	0.778963	5.52356	0.0110945	0.0364625
ENSG00000160055	56063	TMEM234	0.776345	4.87593	0.000373423	0.00352477
ENSG00000175334	8815	BANF1	0.775384	5.20415	9.48306e-05	0.00140678
ENSG00000164904	501	ALDH7A1	0.775249	5.27426	0.0120429	0.0387633
ENSG00000198482	388558	ZNF808	0.774311	3.50108	0.000158394	0.00192509
ENSG00000131697	261734	NPHP4	0.773587	5.16041	0.000716068	0.00537425
ENSG00000075275	9620	CELSR1	0.772888	8.48302	0.000188939	0.00217629
ENSG00000251562	378938	MALAT1	0.770449	9.4504	0.00108679	0.0071808
ENSG00000197283	8831	SYNGAP1	0.767989	6.22986	0.00653968	0.0250828
ENSG00000169871	81844	TRIM56	0.766808	5.86725	0.000649661	0.00504846
ENSG00000143545	5872	RAB13	0.761772	5.49763	3.77023e-06	0.000203016
ENSG00000077713	203427	SLC25A43	0.759552	4.046	0.00286123	0.0141225
ENSG00000186496	252884	ZNF396	0.75465	4.05367	0.0130337	0.0410569
ENSG00000251474	132241	RPL32P3	0.753039	5.0975	0.00911277	0.0318242
ENSG00000183077	125061	AFMID	0.751765	4.45877	0.00623962	0.0243129
ENSG00000212907	4539	ND4L	0.746948	10.258	0.00520632	0.0215248
ENSG00000143252	6391	SDHC	0.74335	5.41058	1.6888e-05	0.00048245
ENSG00000187860	550631	CCDC157	0.741549	6.02921	0.0156639	0.0468494
ENSG00000047578	23247	KATNIP	0.740846	7.47531	0.00133133	0.00830203
ENSG00000123810	80776	B9D2	0.740598	4.83734	0.00497634	0.0207733
ENSG00000070718	10947	AP3M2	0.734459	4.90468	0.00712514	0.0266726
ENSG00000173531	4485	MST1	0.732668	4.04864	0.000893297	0.00629222
ENSG00000132881	79363	CPLANE2	0.731384	3.43822	0.0077149	0.0282042
ENSG00000143458	126626	GABPB2	0.728641	4.77038	0.000260199	0.00275009
ENSG00000160972	84988	PPP1R16A	0.727857	7.09231	0.00553061	0.0223507
ENSG00000243156	57553	MICAL3	0.724265	4.46341	0.0052682	0.0217056
ENSG00000182224	124637	CYB5D1	0.724114	6.53707	0.012563	0.0400304
ENSG00000005156	3980	LIG3	0.722039	5.43755	0.00272179	0.0136406
ENSG00000182534	439921	MXRA7	0.721991	4.62311	0.00324416	0.0154169
ENSG00000186638	347240	KIF24	0.72181	5.29042	0.0109541	0.0361557
ENSG00000006740	9912	ARHGAP44	0.721236	5.07744	0.0086971	0.0307208
ENSG00000106244	11333	PDAP1	0.720129	5.97405	4.62375e-07	6.38433e-05
ENSG00000138771	57619	SHROOM3	0.720061	7.12221	0.00849711	0.0302197
ENSG00000143222	51506	UFC1	0.719226	7.71364	0.0170282	0.0498216
ENSG00000160953	84939	PWWP3A	0.718789	5.26067	0.000364002	0.00348162
ENSG00000165055	55798	METTL2B	0.718047	3.81788	0.000842081	0.00604353
ENSG00000175970	84747	UNC119B	0.717868	7.11352	0.0118443	0.0382611
ENSG00000179406	285908	LINC00174	0.714266	3.58972	0.00871302	0.0307569
ENSG00000243667	116143	DNAAF10	0.714107	3.29661	0.00974512	0.0332662
ENSG00000183762	83999	KREMEN1	0.713065	6.37657	0.00491637	0.0206109
ENSG00000175390	8665	EIF3F	0.712279	6.33928	2.82857e-06	0.000177058
ENSG00000170264	84140	FAM161A	0.710121	4.14491	0.0154565	0.046447
ENSG00000162104	115	ADCY9	0.709706	5.30767	0.00405407	0.01802
ENSG00000154079	135154	SDHAF4	0.708282	4.19426	0.00648728	0.024944
ENSG00000204991	84501	SPIRE2	0.707546	5.61713	0.00363931	0.0167582
ENSG00000115042	51011	FAHD2A	0.707065	3.47316	0.000203682	0.00230185
ENSG00000123154	84292	WDR83	0.706975	3.54113	0.00431228	0.0188029
ENSG00000007237	8522	GAS7	0.705708	5.40194	0.0071152	0.0266541
ENSG00000089157	6175	RPLP0	0.70251	9.26051	2.47038e-05	0.00061173
ENSG00000143624	65123	INTS3	0.700858	6.89752	0.000119457	0.00162648
ENSG00000198794	192683	SCAMP5	0.700234	4.87573	0.0108735	0.0359446
ENSG00000172828	23491	CES3	0.699681	4.9954	0.00977948	0.0333412
ENSG00000100316	6122	RPL3	0.699296	9.57742	2.8812e-05	0.000671657
ENSG00000122512	5395	PMS2	0.699052	3.67834	0.000762221	0.00563427
ENSG00000076351	113235	SLC46A1	0.697961	5.03988	0.000285005	0.00294578
ENSG00000173171	4580	MTX1	0.697392	4.03758	0.000123813	0.00165796
ENSG00000185340	10634	GAS2L1	0.695743	3.91648	0.00865471	0.0306113
ENSG00000180712	728175	LINC02363	0.695333	3.65291	0.0149913	0.0455063
ENSG00000172831	8824	CES2	0.695224	6.58198	0.00520178	0.021519
ENSG00000138162	10579	TACC2	0.6942	7.59377	0.000311559	0.0031331
ENSG00000119650	112752	IFT43	0.693995	5.66751	0.00822804	0.0295682
ENSG00000198185	55713	ZNF334	0.692594	3.35361	0.00784574	0.0285468
ENSG00000110274	22897	CEP164	0.692414	5.61268	0.000243445	0.002628
ENSG00000106153	51142	CHCHD2	0.690729	6.88276	4.84089e-05	0.000900456
ENSG00000123815	79934	COQ8B	0.690676	6.21698	0.00185267	0.0103815
ENSG00000266714	80022	MYO15B	0.689927	5.93163	0.000561257	0.00458282
ENSG00000006453	55971	BAIAP2L1	0.688933	7.44222	0.0022808	0.0120354
ENSG00000002016	5893	RAD52	0.686302	3.09891	0.00573651	0.0229248
ENSG00000181143	94025	MUC16	0.684979	9.96287	0.0035875	0.0165897
ENSG00000136305	27141	CIDEB	0.684839	4.20911	0.00846468	0.0301413
ENSG00000142920	113451	AZIN2	0.683948	3.40848	0.00399704	0.0178179
ENSG00000180626	84622	ZNF594	0.683552	3.64768	0.00984565	0.0334769
ENSG00000185787	10933	MORF4L1	0.683528	7.14628	1.32173e-06	0.000121568
ENSG00000178980	6415	SELENOW	0.679542	7.46354	0.00912954	0.0318548
ENSG00000083844	9422	ZNF264	0.679354	3.82251	0.00258568	0.0131668
ENSG00000156345	23552	CDK20	0.678083	5.22541	0.00472694	0.0200932
ENSG00000096384	3326	HSP90AB1	0.676699	9.41387	7.43312e-05	0.00120022
ENSG00000133026	4628	MYH10	0.67419	5.34254	0.000903203	0.00633301
ENSG00000011143	54903	MKS1	0.673206	5.68945	0.00371971	0.0169679
ENSG00000085063	966	CD59	0.670638	9.4	0.013649	0.0424364
ENSG00000171574	201514	ZNF584	0.668808	4.10824	0.00271607	0.0136246
ENSG00000196187	9725	TMEM63A	0.667948	7.17093	0.00325755	0.0154622
ENSG00000213753	65996	CENPBD2P	0.667588	5.70084	0.0061213	0.0240169
ENSG00000213753	100271626	RPL23AP79	0.667588	5.70084	0.0061213	0.0240169
ENSG00000158106	114822	RHPN1	0.667396	6.50758	0.00430686	0.0187955
ENSG00000076555	32	ACACB	0.665989	5.53114	0.000425986	0.0038651
ENSG00000237441	5863	RGL2	0.665777	7.35158	0.000772688	0.00568818
ENSG00000178149	55152	DALRD3	0.664135	5.6614	0.0156211	0.0467851
ENSG00000196313	9883	POM121	0.662134	4.4952	0.000114609	0.00158645
ENSG00000175727	22877	MLXIP	0.661332	7.07326	3.37313e-05	0.000732939
ENSG00000064218	58524	DMRT3	0.65978	3.87901	0.0163157	0.0483146
ENSG00000114770	10057	ABCC5	0.657708	7.06491	0.015196	0.045882
ENSG00000107130	23413	NCS1	0.657318	5.27107	0.00216562	0.0116511
ENSG00000108840	10014	HDAC5	0.655922	5.57958	0.00407836	0.0180837
ENSG00000176155	284001	CCDC57	0.652932	7.11201	0.0012738	0.00804622
ENSG00000119685	23093	TTLL5	0.651059	5.91691	0.00377424	0.0171008
ENSG00000148384	56623	INPP5E	0.650908	5.32271	0.00371437	0.0169602
ENSG00000157796	57728	WDR19	0.650845	6.49061	0.0120224	0.038732
ENSG00000154856	147495	APCDD1	0.650695	4.91595	0.0139385	0.0431571
ENSG00000133226	10250	SRRM1	0.650189	6.23224	2.63556e-06	0.000172069
ENSG00000171219	55561	CDC42BPG	0.649646	6.99041	0.00278071	0.0138521
ENSG00000161036	222229	LRWD1	0.649284	6.30753	0.0153946	0.0463404
ENSG00000235823	90271	OLMALINC	0.649171	3.70598	0.00778832	0.0284194
ENSG00000146223	285855	RPL7L1	0.648409	6.04213	4.20314e-06	0.000212525
ENSG00000180891	404093	CUEDC1	0.647431	6.64594	0.00877179	0.0308733
ENSG00000143375	57530	CGN	0.646953	7.96274	0.000132955	0.0017273
ENSG00000171703	6919	TCEA2	0.645557	4.2197	0.00707733	0.0265492
ENSG00000183495	57634	EP400	0.643902	6.72427	1.92317e-05	0.000519112
ENSG00000076258	2329	FMO4	0.642216	4.29085	0.0115213	0.0375329
ENSG00000088986	8655	DYNLL1	0.642037	8.24305	0.00907313	0.0317574
ENSG00000160111	27151	CPAMD8	0.640148	5.09235	0.0133987	0.0418543
ENSG00000235437	92249	LINC01278	0.635503	4.59779	0.00406553	0.0180485
ENSG00000169231	7059	THBS3	0.635489	3.56502	0.0124098	0.039648
ENSG00000115539	79031	PDCL3	0.635081	3.63169	0.000610574	0.00483877
ENSG00000107249	169792	GLIS3	0.630428	5.4448	0.0127193	0.0403973
ENSG00000082781	3693	ITGB5	0.628471	5.68342	0.00475332	0.0201401
ENSG00000078246	7289	TULP3	0.628139	5.35423	0.000498915	0.00427471
ENSG00000064309	50937	CDON	0.628137	4.33637	0.00874374	0.0308249
ENSG00000141013	2622	GAS8	0.626458	6.50181	0.0105193	0.0350968
ENSG00000037042	27175	TUBG2	0.626052	3.38707	0.00475358	0.0201401
ENSG00000121289	84902	CEP89	0.625676	4.9835	0.0015315	0.00910281
ENSG00000172375	9854	C2CD2L	0.624649	6.30337	0.0104707	0.0349781
ENSG00000135540	57224	NHSL1	0.624601	5.1385	0.0052333	0.0216101
ENSG00000242498	348110	ARPIN	0.623318	4.10271	0.0032287	0.015366
ENSG00000142675	10256	CNKSR1	0.622221	5.93399	0.00910656	0.0318227
ENSG00000267080	339201	ASB16-AS1	0.621958	3.24709	0.00419822	0.0184325
ENSG00000072071	22859	ADGRL1	0.621628	4.67569	0.0126048	0.0400926
ENSG00000170315	7314	UBB	0.620849	8.97064	0.00136314	0.0084277
ENSG00000163482	27148	STK36	0.620796	6.74147	0.00456995	0.0196559
ENSG00000183826	114781	BTBD9	0.620273	5.95474	0.00120831	0.00775534
ENSG00000184208	79640	C22orf46	0.618757	3.84104	5.99471e-05	0.00104134
ENSG00000140398	79661	NEIL1	0.618254	6.02118	0.0012217	0.00780881
ENSG00000101004	22981	NINL	0.617577	3.82719	0.0125793	0.0400352
ENSG00000189403	3146	HMGB1	0.617326	6.1411	0.00107734	0.0071403
ENSG00000240230	90639	COX19	0.617213	4.63203	0.000854004	0.00610732
ENSG00000100360	11020	IFT27	0.615636	7.0621	0.0120216	0.038732
ENSG00000141012	2588	GALNS	0.614655	5.55025	0.0161967	0.0480283
ENSG00000186575	4771	NF2	0.612963	5.42572	1.17156e-05	0.000380053
ENSG00000077157	4660	PPP1R12B	0.611247	5.81319	0.00497622	0.0207733
ENSG00000102878	3299	HSF4	0.609977	3.67064	0.00487809	0.0204743
ENSG00000099901	5902	RANBP1	0.608809	4.90802	4.53334e-05	0.000868804
ENSG00000221838	9179	AP4M1	0.608482	4.89618	0.0069723	0.0262742
ENSG00000198874	55253	TYW1	0.605556	3.87214	0.000645772	0.00503618
ENSG00000099326	7593	MZF1	0.604487	5.64925	0.00137048	0.00845364
ENSG00000136811	4957	ODF2	0.603908	6.62159	0.00541762	0.022018
ENSG00000150991	7316	UBC	0.603603	9.42258	0.00757051	0.0278085
ENSG00000245680	92285	ZNF585B	0.603107	3.81917	0.000837212	0.00601921
ENSG00000133247	84787	KMT5C	0.600279	3.80093	0.0128292	0.0406382
ENSG00000099821	5442	POLRMT	0.598241	5.30541	0.000673388	0.00517658
ENSG00000073792	10644	IGF2BP2	0.597752	5.55752	0.00063657	0.00498608
ENSG00000164050	5364	PLXNB1	0.595981	8.29883	0.00242336	0.0125842
ENSG00000130204	10452	TOMM40	0.594993	4.80201	6.08932e-05	0.00105022
ENSG00000143061	3321	IGSF3	0.594862	5.09286	0.0107387	0.0356632
ENSG00000102898	10204	NUTF2	0.592508	5.29801	4.3224e-05	0.000848735
ENSG00000204304	5089	PBX2	0.592358	5.71929	6.84135e-05	0.00113182
ENSG00000142798	3339	HSPG2	0.591607	7.07877	0.00155316	0.00920612
ENSG00000166164	29117	BRD7	0.590724	5.5326	1.40823e-05	0.000432098
ENSG00000172613	5883	RAD9A	0.589041	5.89006	0.00380976	0.0171966
ENSG00000168056	4054	LTBP3	0.588385	5.60087	0.0111321	0.0365749
ENSG00000248333	984	CDK11B	0.588357	4.07143	0.000503446	0.00429985
ENSG00000185156	162387	MFSD6L	0.587936	4.06489	0.0120874	0.0388784
ENSG00000119397	11064	CNTRL	0.58688	6.18772	0.00920342	0.0320365
ENSG00000198182	84775	ZNF607	0.586702	3.7657	0.00372987	0.0169855
ENSG00000125746	24139	EML2	0.586611	6.29964	0.00520292	0.021519
ENSG00000158856	2039	DMTN	0.586573	5.82346	0.011799	0.0381494

## Sheet: Exvivo Downregulated
ENSEMBL	ENTREZID	SYMBOL	logFC	AveExpr	P.Value	adj.P.Val
ENSG00000230734	619445	RPL10P3	-8.14613	1.31626	5.2457e-14	4.70801e-11
ENSG00000247627	100293090	MTND4P12	-6.06845	4.93077	5.58496e-13	3.75938e-10
ENSG00000237973	107075141	MTCO1P12	-4.44534	7.37864	0.00537623	0.0219243
ENSG00000163606	131450	CD200R1	-3.61367	4.3937	2.58187e-06	0.000171936
ENSG00000138061	1545	CYP1B1	-3.38731	3.74145	0.00133338	0.00830567
ENSG00000156738	931	MS4A1	-3.14148	3.0209	0.0169259	0.0496303
ENSG00000110848	969	CD69	-3.10617	4.61458	0.00016185	0.00195637
ENSG00000090104	5996	RGS1	-2.97469	5.21012	0.000683261	0.00522637
ENSG00000129538	6035	RNASE1	-2.96651	3.70909	4.66503e-05	0.000875303
ENSG00000091137	5172	SLC26A4	-2.80865	7.25345	0.00976336	0.0333074
ENSG00000185477	285513	GPRIN3	-2.70865	2.92948	0.000309185	0.00311559
ENSG00000172215	10663	CXCR6	-2.69418	2.99738	0.000240455	0.00260659
ENSG00000164308	64167	ERAP2	-2.63644	5.25181	0.00644044	0.0248526
ENSG00000179344	3119	HLA-DQB1	-2.50522	6.74135	0.00437287	0.0189825
ENSG00000134242	26191	PTPN22	-2.45717	3.34256	0.000635328	0.00498608
ENSG00000243753	3139	HLA-L	-2.4552	5.1405	0.000438379	0.00395091
ENSG00000120217	29126	CD274	-2.34899	4.52487	8.33479e-06	0.000315615
ENSG00000115232	3676	ITGA4	-2.32479	2.53738	0.00138744	0.00852409
ENSG00000196735	3117	HLA-DQA1	-2.27273	6.93404	0.000498591	0.00427471
ENSG00000134049	51124	IER3IP1	-2.21963	4.51017	9.01884e-08	1.8327e-05
ENSG00000140297	9245	GCNT3	-2.21642	4.84343	7.6202e-05	0.00121765
ENSG00000140274	405753	DUOXA2	-2.21166	6.56413	0.00556852	0.0224736
ENSG00000153563	925	CD8A	-2.20132	4.40479	0.00743262	0.02748
ENSG00000116824	914	CD2	-2.20045	3.69052	0.00151403	0.0090565
ENSG00000108231	9211	LGI1	-2.19636	5.13354	0.000168867	0.00201629
ENSG00000172575	10125	RASGRP1	-2.18986	3.08413	3.89223e-06	0.000203016
ENSG00000131203	3620	IDO1	-2.18935	8.24374	0.00297536	0.0144933
ENSG00000172159	257019	FRMD3	-2.17762	2.60764	0.0107115	0.0356278
ENSG00000198502	3127	HLA-DRB5	-2.17243	7.65067	0.00135398	0.0083855
ENSG00000134970	51014	TMED7	-2.15787	5.81184	5.27773e-07	6.84833e-05
ENSG00000160791	1234	CCR5	-2.13052	3.01586	0.00308035	0.0148502
ENSG00000211772	28638	TRBC2	-2.1092	5.08253	0.0024599	0.012708
ENSG00000135218	948	CD36	-2.10534	5.82304	0.000670715	0.00516764
ENSG00000076641	55824	PAG1	-2.08595	3.13024	4.88817e-05	0.000906121
ENSG00000169442	1043	CD52	-2.07117	3.76657	0.00486742	0.0204541
ENSG00000060982	586	BCAT1	-2.05532	3.52092	0.000459099	0.00405952
ENSG00000198851	916	CD3E	-1.99115	3.80001	0.0102083	0.034368
ENSG00000136155	8796	SCEL	-1.98134	3.80363	1.87971e-05	0.000512229
ENSG00000066294	8832	CD84	-1.96381	2.78344	0.00117306	0.00756066
ENSG00000106588	5683	PSMA2	-1.95196	2.8433	3.32761e-10	1.3784e-07
ENSG00000138821	64116	SLC39A8	-1.94484	4.59531	4.01412e-06	0.000207847
ENSG00000165997	221079	ARL5B	-1.94425	5.40949	0.000481349	0.00418412
ENSG00000101447	81610	FAM83D	-1.92569	5.07965	2.5683e-06	0.000171936
ENSG00000137727	57569	ARHGAP20	-1.9254	4.27663	1.33522e-07	2.44022e-05
ENSG00000105388	1048	CEACAM5	-1.9163	9.65287	0.000543526	0.00448909
ENSG00000135905	55619	DOCK10	-1.91284	3.46757	0.00378458	0.017126
ENSG00000167984	197358	NLRC3	-1.89723	3.40304	0.00181221	0.0101972
ENSG00000101445	26051	PPP1R16B	-1.86459	4.57691	0.000930021	0.00644966
ENSG00000124875	6372	CXCL6	-1.86269	4.85018	0.00698884	0.0263273
ENSG00000198758	79574	EPS8L3	-1.8557	3.57548	0.00180907	0.0101849
ENSG00000127324	7103	TSPAN8	-1.85375	6.23329	0.000112182	0.00155896
ENSG00000009790	80342	TRAF3IP3	-1.84204	3.30568	0.00383932	0.0173083
ENSG00000167286	915	CD3D	-1.8412	3.37369	0.00695325	0.0262116
ENSG00000115085	7535	ZAP70	-1.83171	3.92931	0.0050461	0.0209751
ENSG00000163739	2919	CXCL1	-1.83126	7.28377	0.00988752	0.0335714
ENSG00000175040	9435	CHST2	-1.82392	3.69423	0.000521088	0.00436435
ENSG00000204632	3135	HLA-G	-1.82034	3.65519	0.00084169	0.00604353
ENSG00000111711	51026	GOLT1B	-1.81977	5.01885	4.50749e-07	6.38433e-05
ENSG00000255302	23741	EID1	-1.80669	5.91763	5.32165e-06	0.000242857
ENSG00000143851	5778	PTPN7	-1.7955	3.52449	0.00393669	0.0176219
ENSG00000185811	10320	IKZF1	-1.78794	3.75804	0.00554077	0.0223834
ENSG00000152078	148534	TLCD4	-1.78784	3.3517	1.18179e-08	3.34943e-06
ENSG00000254838	387751	GVINP1	-1.78586	3.08546	0.000835459	0.00601062
ENSG00000122122	54440	SASH3	-1.78187	4.0172	0.00559802	0.0225477
ENSG00000041353	5874	RAB27B	-1.78051	5.57182	8.99391e-06	0.000329471
ENSG00000204616	11074	TRIM31	-1.777	5.5762	0.00767349	0.02811
ENSG00000131979	2643	GCH1	-1.76984	5.44176	3.1702e-05	0.000706895
ENSG00000151012	23657	SLC7A11	-1.76366	4.03229	0.0026839	0.0135
ENSG00000166128	51762	RAB8B	-1.75858	4.24222	6.08437e-06	0.000257987
ENSG00000139679	10161	LPAR6	-1.74236	5.24035	3.71078e-06	0.000203016
ENSG00000071073	11320	MGAT4A	-1.74225	5.23915	5.07955e-06	0.000235017
ENSG00000168497	8436	CAVIN2	-1.74221	3.1773	0.00268614	0.0135
ENSG00000169908	4071	TM4SF1	-1.73886	6.09201	0.000578891	0.00469124
ENSG00000145780	56929	FEM1C	-1.73468	5.36438	7.9402e-07	8.72612e-05
ENSG00000139278	11010	GLIPR1	-1.73408	3.02448	0.0038296	0.0172789
ENSG00000153283	10225	CD96	-1.73346	3.7294	0.0114732	0.0374217
ENSG00000102879	11151	CORO1A	-1.73151	5.56205	0.00803517	0.0290691
ENSG00000182866	3932	LCK	-1.72524	4.09318	0.00237765	0.0124006
ENSG00000175463	374403	TBC1D10C	-1.72301	4.10981	0.00464457	0.0198949
ENSG00000213949	3672	ITGA1	-1.71777	4.13665	0.0048695	0.0204542
ENSG00000140105	7453	WARS1	-1.70528	8.78305	0.00976203	0.0333074
ENSG00000142731	10733	PLK4	-1.70289	4.11975	0.000201181	0.00227836
ENSG00000167895	147138	TMC8	-1.70161	4.114	0.00160219	0.00938031
ENSG00000080493	8671	SLC4A4	-1.70135	5.25249	8.33591e-05	0.00129549
ENSG00000130487	113730	KLHDC7B	-1.69313	5.27399	0.00578683	0.023083
ENSG00000128590	4189	DNAJB9	-1.68048	4.78333	7.60723e-05	0.00121738
ENSG00000134294	54407	SLC38A2	-1.66892	7.90113	0.00110167	0.00723034
ENSG00000067167	23471	TRAM1	-1.66565	7.23585	5.13446e-07	6.84833e-05
ENSG00000260916	9236	CCPG1	-1.66457	5.04688	1.21745e-07	2.30034e-05
ENSG00000110852	9976	CLEC2B	-1.65082	4.21878	0.000678512	0.00519742
ENSG00000069667	6095	RORA	-1.64937	5.39038	3.96327e-07	5.94512e-05
ENSG00000184371	1435	CSF1	-1.64231	4.29831	0.00621533	0.0242621
ENSG00000129084	5682	PSMA1	-1.63769	4.32604	7.17122e-07	8.46435e-05
ENSG00000081320	9262	STK17B	-1.63385	5.91307	7.6801e-05	0.00122359
ENSG00000115540	25843	MOB4	-1.63096	4.16238	1.02356e-07	2.04144e-05
ENSG00000204267	6891	TAP2	-1.62496	5.92502	0.00147427	0.00887889
ENSG00000135903	5077	PAX3	-1.62398	3.20052	0.000453727	0.00402871
ENSG00000008517	9235	IL32	-1.62295	3.39779	0.0133548	0.0417627
ENSG00000011426	54443	ANLN	-1.61216	3.88901	0.00052679	0.00439468
ENSG00000049130	4254	KITLG	-1.6056	5.7783	6.11156e-06	0.000258124
ENSG00000113328	900	CCNG1	-1.60538	5.28086	5.10623e-06	0.000235017
ENSG00000197045	2764	GMFB	-1.60331	4.78172	4.48102e-06	0.000219367
ENSG00000139626	3695	ITGB7	-1.60265	4.12687	0.00335073	0.0157312
ENSG00000151135	90488	TMEM263	-1.596	5.36187	5.73147e-07	7.17766e-05
ENSG00000023445	330	BIRC3	-1.59525	5.98199	0.00106116	0.00707659
ENSG00000137449	132864	CPEB2	-1.59347	4.28685	1.28054e-06	0.000120794
ENSG00000124664	25803	SPDEF	-1.59316	6.87236	6.56366e-05	0.001108
ENSG00000057657	639	PRDM1	-1.59312	4.5305	0.00449061	0.0193999
ENSG00000170608	3171	FOXA3	-1.58588	3.99448	0.000486512	0.00420187
ENSG00000109586	51809	GALNT7	-1.57216	6.24064	1.39916e-06	0.000124825
ENSG00000105825	7980	TFPI2	-1.57074	4.08369	0.00406407	0.0180485
ENSG00000144366	51454	GULP1	-1.57004	4.63693	1.15692e-05	0.000377082
ENSG00000113532	7903	ST8SIA4	-1.56468	5.77169	0.00654561	0.0250951
ENSG00000231389	3113	HLA-DPA1	-1.55194	8.3336	0.00313765	0.0150189
ENSG00000213047	163486	DENND1B	-1.54171	4.7152	1.84524e-07	3.1052e-05
ENSG00000141574	6398	SECTM1	-1.54146	6.16648	0.00424588	0.0185962
ENSG00000170802	3344	FOXN2	-1.53925	3.45838	1.05615e-06	0.000106306
ENSG00000187527	344905	ATP13A5	-1.53864	4.91763	0.00758835	0.0278455
ENSG00000181827	64864	RFX7	-1.53714	5.57428	4.04447e-06	0.000207991
ENSG00000090382	4069	LYZ	-1.53536	7.0907	3.57647e-05	0.000758833
ENSG00000128203	57168	ASPHD2	-1.5321	3.34043	0.000101591	0.0014569
ENSG00000104814	11184	MAP4K1	-1.52694	3.12883	0.00758658	0.0278455
ENSG00000196352	1604	CD55	-1.52642	8.7749	0.00125442	0.00796118
ENSG00000162654	115361	GBP4	-1.52385	6.55456	0.01495	0.0454322
ENSG00000172243	64581	CLEC7A	-1.52237	4.78774	0.0109434	0.0361399
ENSG00000133641	91298	C12orf29	-1.52231	4.02158	1.09829e-06	0.000108519
ENSG00000065911	10797	MTHFD2	-1.52202	4.70966	0.00139341	0.00854071
ENSG00000161791	91010	FMNL3	-1.52099	3.60688	0.00789634	0.0286825
ENSG00000147168	3561	IL2RG	-1.51615	4.55407	0.0129761	0.0409479
ENSG00000128591	2318	FLNC	-1.50558	4.34784	0.000985887	0.00671487
ENSG00000136235	10457	GPNMB	-1.5025	5.37851	0.00449469	0.0194097
ENSG00000160593	120425	JAML	-1.50053	4.58632	0.0163471	0.0483679
ENSG00000137563	8836	GGH	-1.49661	4.22729	3.44946e-05	0.000742542
ENSG00000146757	168374	ZNF92	-1.49452	2.84253	9.07184e-05	0.00136267
ENSG00000075790	55973	BCAP29	-1.49247	5.95522	0.000106183	0.00151069
ENSG00000155304	6782	HSPA13	-1.49202	3.89234	3.44737e-06	0.000198123
ENSG00000213402	5790	PTPRCAP	-1.49182	3.98823	0.0030444	0.0147296
ENSG00000162409	5563	PRKAA2	-1.49063	5.38924	3.57988e-06	0.000202221
ENSG00000111860	387119	CEP85L	-1.48824	3.777	6.54307e-06	0.00026592
ENSG00000158055	57822	GRHL3	-1.48739	3.78119	0.00525369	0.021667
ENSG00000185305	54622	ARL15	-1.48732	3.73398	2.00852e-06	0.000147155
ENSG00000033178	55236	UBA6	-1.4823	6.22776	2.47646e-05	0.00061173
ENSG00000102575	54	ACP5	-1.48007	4.03786	0.00087996	0.00623088
ENSG00000111666	56994	CHPT1	-1.47733	5.25413	7.19705e-06	0.000284971
ENSG00000048740	10659	CELF2	-1.4755	4.30909	0.0039493	0.017649
ENSG00000033867	9497	SLC4A7	-1.4744	4.45872	1.21202e-05	0.000387732
ENSG00000166401	5271	SERPINB8	-1.47267	4.75845	7.70803e-07	8.64757e-05
ENSG00000168062	116071	BATF2	-1.47023	4.35574	0.0073037	0.0270964
ENSG00000156136	1633	DCK	-1.46556	3.90403	1.08876e-06	0.000108519
ENSG00000159231	874	CBR3	-1.46418	3.7322	0.00476204	0.0201521
ENSG00000175893	340481	ZDHHC21	-1.46308	4.70093	1.61799e-07	2.85669e-05
ENSG00000147676	114569	MAL2	-1.46197	7.8765	1.43769e-05	0.000438638
ENSG00000124102	5266	PI3	-1.45853	7.93857	0.0143843	0.0440736
ENSG00000180667	55432	YOD1	-1.4503	4.91289	4.58108e-05	0.0008717
ENSG00000160182	7031	TFF1	-1.44962	4.04354	0.00303107	0.014683
ENSG00000020577	23034	SAMD4A	-1.44841	3.62654	1.56509e-06	0.000130667
ENSG00000204252	3111	HLA-DOA	-1.44636	5.5493	0.0150201	0.0455294
ENSG00000160862	563	AZGP1	-1.44161	4.84606	0.0160845	0.0477743
ENSG00000115641	2274	FHL2	-1.44117	5.10715	6.51063e-06	0.00026592
ENSG00000242574	3109	HLA-DMB	-1.44106	6.20589	0.000829172	0.00598137
ENSG00000162645	2634	GBP2	-1.43603	6.09354	0.0114605	0.0373915
ENSG00000186767	139886	SPIN4	-1.43151	3.28273	2.78721e-06	0.000176287
ENSG00000205707	144363	ETFRF1	-1.42936	3.59442	3.03527e-05	0.000689423
ENSG00000164136	3600	IL15	-1.42935	2.99403	6.8014e-06	0.000272309
ENSG00000164951	54704	PDP1	-1.42619	5.90719	0.000173584	0.00205214
ENSG00000164120	3248	HPGD	-1.42074	4.71383	0.0149147	0.0453762
ENSG00000069493	29121	CLEC2D	-1.41777	3.51394	0.000123561	0.00165723
ENSG00000139826	84945	ABHD13	-1.41643	4.5559	1.40981e-06	0.000124825
ENSG00000105971	858	CAV2	-1.40858	4.94792	2.63616e-06	0.000172069
ENSG00000175105	55279	ZNF654	-1.40676	3.85079	2.9209e-07	4.55914e-05
ENSG00000204116	53344	CHIC1	-1.40631	3.10781	1.66574e-06	0.000134524
ENSG00000104343	55284	UBE2W	-1.40489	4.31145	1.0842e-05	0.000363763
ENSG00000204618	80352	RNF39	-1.39718	5.25309	0.00502698	0.0209441
ENSG00000106460	54664	TMEM106B	-1.39358	6.07697	5.08645e-06	0.000235017
ENSG00000163993	6286	S100P	-1.38566	9.14777	0.000125411	0.00166957
ENSG00000120063	10672	GNA13	-1.38417	5.69494	1.30103e-06	0.000120794
ENSG00000072401	7321	UBE2D1	-1.38219	4.56982	1.94551e-06	0.000145508
ENSG00000110031	9404	LPXN	-1.38014	3.66929	0.000957218	0.00658737
ENSG00000152332	127933	UHMK1	-1.37667	7.57703	1.65085e-05	0.000479335
ENSG00000119862	29094	LGALSL	-1.3749	3.76032	0.000448754	0.0040057
ENSG00000221823	5534	PPP3R1	-1.37378	5.41016	5.60841e-07	7.15823e-05
ENSG00000153037	6728	SRP19	-1.37281	3.14239	1.18381e-07	2.29388e-05
ENSG00000047634	6322	SCML1	-1.3679	3.4387	1.63103e-06	0.000133757
ENSG00000166289	79156	PLEKHF1	-1.36718	3.85464	5.70469e-06	0.000248544
ENSG00000104312	8767	RIPK2	-1.36455	3.69452	1.05946e-05	0.00035958
ENSG00000112773	55603	TENT5A	-1.36407	5.77038	0.00480235	0.0202988
ENSG00000146674	3486	IGFBP3	-1.36205	8.4532	0.0145788	0.0445429
ENSG00000164031	79982	DNAJB14	-1.35561	4.94693	9.33893e-06	0.00033696
ENSG00000173890	26996	GPR160	-1.35534	4.52696	1.33443e-06	0.000121568
ENSG00000198959	7052	TGM2	-1.35462	8.76717	0.0088149	0.0310047
ENSG00000198860	116461	TSEN15	-1.35229	4.2592	1.66161e-05	0.000479774
ENSG00000139725	54509	RHOF	-1.35217	2.86301	0.00436313	0.0189556
ENSG00000030419	22807	IKZF2	-1.34889	6.90657	2.86055e-06	0.000177058
ENSG00000155545	166968	MIER3	-1.34834	4.8775	5.64949e-07	7.15823e-05
ENSG00000100744	51527	GSKIP	-1.34189	5.58106	3.80279e-06	0.000203016
ENSG00000168283	648	BMI1	-1.3411	4.33223	2.41157e-06	0.00016543
ENSG00000146054	81786	TRIM7	-1.34076	4.6839	3.84023e-05	0.00079247
ENSG00000181444	168544	ZNF467	-1.3382	3.71826	0.000200787	0.00227629
ENSG00000106462	2146	EZH2	-1.33624	4.54056	4.73212e-06	0.000227475
ENSG00000152766	118932	ANKRD22	-1.33535	3.02772	0.000804879	0.00584922
ENSG00000151366	4718	NDUFC2	-1.33359	4.31895	2.67416e-06	0.000173374
ENSG00000086548	4680	CEACAM6	-1.33306	7.85532	0.00864191	0.030576
ENSG00000188042	10123	ARL4C	-1.33094	4.63596	9.02294e-05	0.00135722
ENSG00000115919	8942	KYNU	-1.32584	5.63651	0.00717655	0.0268172
ENSG00000115419	2744	GLS	-1.32542	4.85545	1.30081e-06	0.000120794
ENSG00000065615	51167	CYB5R4	-1.32213	5.15493	7.38764e-07	8.46435e-05
ENSG00000137440	9982	FGFBP1	-1.32059	3.27423	0.0110519	0.0363446
ENSG00000117525	2152	F3	-1.31805	9.77718	0.000348201	0.00340302
ENSG00000143742	6726	SRP9	-1.316	6.40121	0.000929312	0.00644966
ENSG00000134602	51765	STK26	-1.3147	4.33976	9.94624e-07	0.00010202
ENSG00000124406	10396	ATP8A1	-1.31236	3.99889	0.000358535	0.00346222
ENSG00000176018	116068	LYSMD3	-1.31155	4.73346	2.76569e-05	0.000653212
ENSG00000114346	1894	ECT2	-1.30868	4.58006	3.1475e-05	0.00070329
ENSG00000152952	5352	PLOD2	-1.30855	4.94064	0.00104274	0.00699269
ENSG00000116815	965	CD58	-1.30599	3.87107	2.93681e-06	0.00018074
ENSG00000115415	6772	STAT1	-1.30507	9.00203	0.00693053	0.0261534
ENSG00000113083	4015	LOX	-1.30321	5.61833	7.08945e-05	0.00115961
ENSG00000112893	4124	MAN2A1	-1.30268	5.55847	9.36478e-06	0.00033696
ENSG00000223865	3115	HLA-DPB1	-1.29875	7.21772	0.0166874	0.0490778
ENSG00000213639	5500	PPP1CB	-1.2977	7.58841	2.79899e-06	0.000176287
ENSG00000204287	3122	HLA-DRA	-1.2961	10.1171	0.00161962	0.00945951
ENSG00000188761	440603	BCL2L15	-1.2903	5.02862	0.000409599	0.00375117
ENSG00000172071	9451	EIF2AK3	-1.28931	6.60245	7.33577e-07	8.46435e-05
ENSG00000165891	144455	E2F7	-1.28707	3.90211	0.00219798	0.0117524
ENSG00000174010	80311	KLHL15	-1.28517	3.74422	0.000925717	0.00643639
ENSG00000127954	79689	STEAP4	-1.28511	7.38127	0.00187345	0.0104382
ENSG00000083457	3682	ITGAE	-1.28203	4.723	0.00281046	0.0139616
ENSG00000158985	56990	CDC42SE2	-1.27694	6.2325	4.02966e-07	5.94512e-05
ENSG00000148154	7357	UGCG	-1.27588	7.48489	4.53811e-05	0.000868804
ENSG00000106537	27075	TSPAN13	-1.27534	7.72212	1.48808e-06	0.000126671
ENSG00000113615	10802	SEC24A	-1.27472	5.73086	3.86302e-05	0.00079247
ENSG00000204257	3108	HLA-DMA	-1.27422	7.14403	0.000627975	0.00493671
ENSG00000153310	51571	CYRIB	-1.27314	5.59745	1.06171e-05	0.00035958
ENSG00000204899	440145	MZT1	-1.27287	3.65032	2.22078e-07	3.62392e-05
ENSG00000136542	11227	GALNT5	-1.26983	6.82373	0.00035743	0.0034618
ENSG00000105810	1021	CDK6	-1.26972	5.14196	5.33533e-08	1.33631e-05
ENSG00000119986	60370	AVPI1	-1.26937	4.78323	0.000166614	0.00199502
ENSG00000111885	4121	MAN1A1	-1.26793	5.57343	0.000155711	0.00190568
ENSG00000157107	115548	FCHO2	-1.26757	5.29193	4.45665e-07	6.38433e-05
ENSG00000066557	55631	LRRC40	-1.26665	3.30235	4.22555e-05	0.000845895
ENSG00000117399	991	CDC20	-1.26459	3.43485	0.00623237	0.0243022
ENSG00000168394	6890	TAP1	-1.26414	8.32256	0.00655777	0.0251253
ENSG00000064651	6558	SLC12A2	-1.26397	6.5497	4.56917e-05	0.000870973
ENSG00000180694	169200	TMEM64	-1.26164	4.0517	0.000122411	0.00164385
ENSG00000188647	375743	PTAR1	-1.26158	5.65166	1.1589e-05	0.000377082
ENSG00000173083	10855	HPSE	-1.26129	4.46912	0.000395569	0.00364257
ENSG00000152256	5163	PDK1	-1.26064	3.53153	0.000259806	0.00275009
ENSG00000101596	23347	SMCHD1	-1.26029	6.85114	0.00142137	0.00863889
ENSG00000164305	836	CASP3	-1.2597	6.61879	2.01152e-05	0.000534916
ENSG00000083937	25978	CHMP2B	-1.25841	5.70254	5.17914e-07	6.84833e-05
ENSG00000113448	5144	PDE4D	-1.25725	4.63494	5.59833e-06	0.000247106
ENSG00000118515	6446	SGK1	-1.25721	9.14866	0.00156745	0.00927041
ENSG00000165169	6990	DYNLT3	-1.25567	4.94786	4.94126e-07	6.73638e-05
ENSG00000116852	23046	KIF21B	-1.25548	4.46055	0.00364548	0.0167714
ENSG00000173559	64859	NABP1	-1.25163	5.34855	0.0135916	0.0422946
ENSG00000165929	123036	TC2N	-1.25138	7.93713	3.7063e-06	0.000203016
ENSG00000103044	3038	HAS3	-1.25119	4.46617	0.00106295	0.00707978
ENSG00000100644	3091	HIF1A	-1.24965	6.21277	0.000359053	0.00346222
ENSG00000165389	171546	SPTSSA	-1.24945	4.85037	1.19273e-07	2.29388e-05
ENSG00000038210	55300	PI4K2B	-1.24916	5.40077	1.33679e-07	2.44022e-05
ENSG00000085365	9522	SCAMP1	-1.24818	5.39979	1.90296e-06	0.000145351
ENSG00000106392	56913	C1GALT1	-1.24688	5.5278	2.97749e-06	0.000181188
ENSG00000003436	7035	TFPI	-1.24279	3.19656	0.00367354	0.0168429
ENSG00000186130	10773	ZBTB6	-1.24118	3.60657	0.000129772	0.00170444
ENSG00000152944	9412	MED21	-1.24059	4.47407	3.04598e-07	4.68645e-05
ENSG00000151229	114134	SLC2A13	-1.24003	4.72521	1.34323e-06	0.000121568
ENSG00000002587	9957	HS3ST1	-1.23992	7.05438	0.000153076	0.00189488
ENSG00000257727	10330	CNPY2	-1.23912	3.37904	4.63021e-10	1.66225e-07
ENSG00000120913	64236	PDLIM2	-1.23896	3.49204	1.11654e-05	0.000369669
ENSG00000151553	57700	FHIP2A	-1.23873	4.96938	4.09702e-06	0.000208137
ENSG00000196154	6275	S100A4	-1.23835	7.86129	3.98298e-05	0.000809371
ENSG00000165410	1073	CFL2	-1.23822	4.28535	0.0028053	0.0139423
ENSG00000136867	1318	SLC31A2	-1.23798	4.37542	0.00481024	0.0203133
ENSG00000119953	10285	SMNDC1	-1.23767	4.26391	1.43717e-06	0.000124825
ENSG00000101888	55916	NXT2	-1.23749	4.09183	1.81017e-07	3.09453e-05
ENSG00000020633	864	RUNX3	-1.23734	4.50338	0.0131798	0.0413236
ENSG00000174695	153339	TMEM167A	-1.23731	6.24681	1.84648e-05	0.000508608
ENSG00000127955	2770	GNAI1	-1.23541	6.15735	1.83946e-06	0.000143455
ENSG00000157551	3772	KCNJ15	-1.23511	5.89042	0.00559818	0.0225477
ENSG00000121281	113	ADCY7	-1.23259	4.23234	0.00618608	0.024175
ENSG00000117500	50999	TMED5	-1.22994	5.8108	1.13938e-06	0.000111556
ENSG00000165476	221035	REEP3	-1.2283	6.08579	3.88387e-06	0.000203016
ENSG00000138678	84803	GPAT3	-1.22829	2.8943	0.00071289	0.00536911
ENSG00000117479	10560	SLC19A2	-1.22792	4.54582	0.000289363	0.00296388
ENSG00000082258	905	CCNT2	-1.22622	6.00928	4.79034e-06	0.000227901
ENSG00000121552	1475	CSTA	-1.22593	5.44373	0.00140062	0.00856114
ENSG00000133703	3845	KRAS	-1.22447	6.30604	3.13091e-06	0.000186887
ENSG00000178295	348654	GEN1	-1.22406	4.21017	0.000223719	0.00246871
ENSG00000174718	55196	RESF1	-1.22234	6.81547	0.000674299	0.00517988
ENSG00000151835	26278	SACS	-1.22046	3.1357	0.000554582	0.00455942
ENSG00000177189	6197	RPS6KA3	-1.22037	6.54591	6.63824e-06	0.000267767
ENSG00000165140	2203	FBP1	-1.21955	6.21686	0.000150313	0.00187804
ENSG00000143353	127018	LYPLAL1	-1.21952	3.46028	6.24417e-05	0.00106638
ENSG00000101400	6640	SNTA1	-1.21923	3.87335	1.56188e-05	0.000464682
ENSG00000117533	8674	VAMP4	-1.21915	3.99424	8.69114e-06	0.000321662
ENSG00000164287	166979	CDC20B	-1.21825	5.79512	0.0170404	0.0498305
ENSG00000138271	53836	GPR87	-1.21747	4.2673	0.000623359	0.00490758
ENSG00000155744	285172	HYCC2	-1.21644	4.78628	2.79392e-06	0.000176287
ENSG00000151881	64417	TMEM267	-1.21558	3.49651	2.95261e-05	0.0006811
ENSG00000123728	57826	RAP2C	-1.21513	4.76022	8.01778e-08	1.69317e-05
ENSG00000076554	7163	TPD52	-1.21459	6.14273	5.00287e-06	0.000235017
ENSG00000172794	326624	RAB37	-1.21425	6.60289	0.00039512	0.00364257
ENSG00000159921	10020	GNE	-1.21276	7.81692	0.00168494	0.00974066
ENSG00000113810	10051	SMC4	-1.2122	6.05285	0.000210404	0.00236047
ENSG00000172716	91607	SLFN11	-1.21206	4.97474	0.00325558	0.0154597
ENSG00000188643	140576	S100A16	-1.21093	7.66004	6.31209e-06	0.000263493
ENSG00000170881	11236	RNF139	-1.20976	5.07098	1.84039e-05	0.000508608
ENSG00000109929	6309	SC5D	-1.20939	5.11136	3.84832e-05	0.00079247
ENSG00000090376	11213	IRAK3	-1.20888	7.36374	0.000995746	0.00674914
ENSG00000204525	3107	HLA-C	-1.20641	10.8762	0.000441199	0.00396417
ENSG00000121039	157506	RDH10	-1.20494	9.0938	0.00192725	0.0106772
ENSG00000146112	170954	PPP1R18	-1.20266	4.49602	0.01099	0.0362185
ENSG00000146112	107987457	LOC107987457	-1.20266	4.49602	0.01099	0.0362185
ENSG00000168876	54851	ANKRD49	-1.20042	4.04723	8.4804e-06	0.000318237
ENSG00000153214	84910	TMEM87B	-1.1987	6.2571	1.04275e-05	0.000359484
ENSG00000109861	1075	CTSC	-1.19357	7.82826	0.000392164	0.00363812
ENSG00000253598	347051	SLC10A5	-1.19339	3.21367	0.00165549	0.00960646
ENSG00000069974	5873	RAB27A	-1.1931	5.45931	3.71645e-06	0.000203016
ENSG00000185947	10308	ZNF267	-1.19087	4.12718	0.000275871	0.0028685
ENSG00000205808	403313	PLPP6	-1.19049	3.77548	9.48896e-06	0.000339522
ENSG00000118322	23120	ATP10B	-1.19002	7.43582	0.00294325	0.0144271
ENSG00000111371	81539	SLC38A1	-1.18758	6.32665	1.04278e-05	0.000359484
ENSG00000112237	892	CCNC	-1.1869	5.91239	2.09762e-06	0.000152645
ENSG00000162924	5966	REL	-1.18634	4.9939	0.000236448	0.00257748
ENSG00000139289	22822	PHLDA1	-1.18572	3.64274	0.00418757	0.0184081
ENSG00000164327	253260	RICTOR	-1.1857	5.85608	2.06599e-05	0.000542244
ENSG00000133962	79820	CATSPERB	-1.18476	3.47335	0.00911459	0.0318242
ENSG00000177888	360023	ZBTB41	-1.18311	4.67608	3.23064e-05	0.000715927
ENSG00000137770	51496	CTDSPL2	-1.18252	5.35435	1.72849e-05	0.000491184
ENSG00000162695	148867	SLC30A7	-1.18085	5.13748	1.05757e-05	0.00035958
ENSG00000164187	92255	LMBRD2	-1.18017	4.72853	1.3185e-05	0.000414002
ENSG00000113594	3977	LIFR	-1.17983	5.73478	5.59624e-05	0.000998184
ENSG00000197601	84188	FAR1	-1.17882	6.23564	1.45487e-06	0.000125352
ENSG00000112245	7803	PTP4A1	-1.17703	6.79223	6.74677e-05	0.00112655
ENSG00000047365	116984	ARAP2	-1.17152	6.23254	5.34312e-05	0.000970303
ENSG00000125999	92747	BPIFB1	-1.17144	11.7307	0.00357228	0.0165335
ENSG00000198160	57708	MIER1	-1.16853	5.20827	1.04843e-06	0.000106306
ENSG00000153130	60592	SCOC	-1.16844	5.62168	7.31355e-05	0.00118804
ENSG00000155903	5922	RASA2	-1.16711	4.86646	5.40074e-05	0.000975939
ENSG00000114166	8850	KAT2B	-1.16676	4.96913	5.74629e-06	0.000248544
ENSG00000138185	953	ENTPD1	-1.16405	3.92633	0.000819696	0.0059406
ENSG00000013016	30845	EHD3	-1.16325	3.63238	1.07219e-05	0.000361181
ENSG00000101974	286410	ATP11C	-1.16271	4.12634	5.82779e-06	0.000249069
ENSG00000183010	5831	PYCR1	-1.16074	3.8479	0.00119335	0.00767305
ENSG00000104442	55156	ARMC1	-1.15682	4.55182	1.77828e-06	0.000140719
ENSG00000104497	64089	SNX16	-1.15553	3.71523	0.000374031	0.00352742
ENSG00000169504	25932	CLIC4	-1.15446	4.9689	7.73677e-05	0.0012308
ENSG00000110080	6484	ST3GAL4	-1.15417	5.72749	0.000120337	0.00163228
ENSG00000115963	390	RND3	-1.15366	6.89902	0.000270523	0.00282319
ENSG00000164209	91137	SLC25A46	-1.15206	5.56812	5.56066e-06	0.000246454
ENSG00000080822	56650	CLDND1	-1.15116	5.27124	3.5865e-05	0.000758833
ENSG00000180628	84333	PCGF5	-1.15073	5.85449	2.34975e-07	3.77714e-05
ENSG00000152601	4154	MBNL1	-1.15073	6.46279	5.52707e-06	0.000245978
ENSG00000121858	8743	TNFSF10	-1.14928	8.98072	0.00147997	0.00889469
ENSG00000151725	79682	CENPU	-1.14925	3.43433	0.00101144	0.00683391
ENSG00000119969	3070	HELLS	-1.14915	3.27216	0.000622175	0.00490185
ENSG00000183696	7378	UPP1	-1.14724	3.22547	0.000375169	0.00353506
ENSG00000163743	25898	RCHY1	-1.14561	4.00074	7.5851e-06	0.00029706
ENSG00000196074	10388	SYCP2	-1.14501	2.96834	0.00201735	0.0110312
ENSG00000106799	7046	TGFBR1	-1.14408	4.62955	1.07315e-05	0.000361181
ENSG00000111348	397	ARHGDIB	-1.14234	6.76117	2.95333e-05	0.0006811
ENSG00000139318	1848	DUSP6	-1.14118	5.78746	0.00294059	0.0144218
ENSG00000145781	51397	COMMD10	-1.14106	3.46293	9.29411e-07	9.62476e-05
ENSG00000189334	57402	S100A14	-1.14062	7.74763	0.000159164	0.0019304
ENSG00000169570	285605	DTWD2	-1.13913	3.45339	1.21394e-05	0.000387732
ENSG00000115520	80219	COQ10B	-1.13879	5.23288	2.84473e-06	0.000177058
ENSG00000180263	55785	FGD6	-1.13861	4.33146	8.67939e-06	0.000321662
ENSG00000116791	1429	CRYZ	-1.13778	3.89504	0.00900823	0.0315816
ENSG00000150961	9871	SEC24D	-1.13581	6.69762	3.00358e-06	0.000181188
ENSG00000162551	249	ALPL	-1.13574	7.95032	0.0167717	0.049299
ENSG00000171492	55144	LRRC8D	-1.13568	5.37673	6.45286e-06	0.00026592
ENSG00000127540	10975	UQCR11	-1.13561	4.87272	6.03399e-09	1.80517e-06
ENSG00000135002	55312	RFK	-1.13415	5.00235	4.25601e-06	0.000213197
ENSG00000134954	2113	ETS1	-1.13377	5.62195	0.00360379	0.0166364
ENSG00000145365	92610	TIFA	-1.1307	3.63076	0.000510455	0.00433565
ENSG00000224531	221710	SMIM13	-1.1289	3.36833	2.98906e-06	0.000181188
ENSG00000145390	54532	USP53	-1.12806	6.11281	7.8748e-05	0.00124911
ENSG00000005059	55013	MCUB	-1.12779	4.10577	0.000373183	0.00352477
ENSG00000077147	56889	TM9SF3	-1.12748	8.27177	1.8753e-05	0.000512229
ENSG00000196850	160760	PPTC7	-1.12627	6.28754	1.04174e-05	0.000359484
ENSG00000005700	25998	IBTK	-1.1244	6.83249	5.82544e-05	0.00102852
ENSG00000198074	57016	AKR1B10	-1.12426	3.73042	0.0115763	0.0376309
ENSG00000083520	22894	DIS3	-1.12399	5.72131	1.41246e-05	0.000432165
ENSG00000091039	114882	OSBPL8	-1.12284	5.64261	1.63936e-06	0.000133757
ENSG00000114127	54464	XRN1	-1.12235	6.53657	0.000276197	0.0028685
ENSG00000189221	4128	MAOA	-1.12149	6.57573	1.10972e-05	0.000369669
ENSG00000139687	5925	RB1	-1.12147	5.30794	1.79002e-06	0.000140719
ENSG00000159399	3099	HK2	-1.11892	6.51515	0.00481113	0.0203133
ENSG00000146373	154214	RNF217	-1.11761	4.4773	4.75225e-06	0.000227475
ENSG00000164983	157378	TMEM65	-1.11528	3.62914	2.49949e-06	0.000169305
ENSG00000180530	8204	NRIP1	-1.11046	4.27573	2.63526e-06	0.000172069
ENSG00000178074	205327	C2orf69	-1.1104	3.84317	3.07847e-05	0.000692175
ENSG00000186891	8784	TNFRSF18	-1.10493	3.87231	0.00362022	0.016698
ENSG00000168374	378	ARF4	-1.10469	7.44964	4.29405e-07	6.24958e-05
ENSG00000005249	5577	PRKAR2B	-1.1044	5.96621	0.00135725	0.00840091
ENSG00000164180	153396	TMEM161B	-1.10401	4.60228	4.49781e-05	0.000866572
ENSG00000121579	80218	NAA50	-1.10299	6.47817	0.000128101	0.00169281
ENSG00000127337	8089	YEATS4	-1.10247	3.81893	0.000272619	0.00284231
ENSG00000142875	5567	PRKACB	-1.10116	4.29939	0.00168108	0.00972352
ENSG00000163527	201595	STT3B	-1.10048	7.07994	3.85029e-05	0.00079247
ENSG00000085449	57590	WDFY1	-1.09905	6.89013	2.21268e-05	0.000567356
ENSG00000136052	84102	SLC41A2	-1.09871	4.05878	0.000176921	0.00207791
ENSG00000129128	60559	SPCS3	-1.0982	6.23125	1.2891e-05	0.000405955
ENSG00000170312	983	CDK1	-1.09639	4.07404	0.000286567	0.00294812
ENSG00000111790	26127	FGFR1OP2	-1.09507	4.66664	1.97968e-06	0.000146035
ENSG00000116711	5321	PLA2G4A	-1.09439	5.18407	0.00131647	0.00823844
ENSG00000117650	4751	NEK2	-1.09406	3.54771	0.00858153	0.030411
ENSG00000138190	54536	EXOC6	-1.09216	4.59753	0.00034726	0.00339691
ENSG00000164292	22836	RHOBTB3	-1.09203	5.0434	0.000581734	0.0047072
ENSG00000128284	80833	APOL3	-1.09188	5.3242	0.00580073	0.0231128
ENSG00000154642	54149	C21orf91	-1.08952	5.25573	0.000114749	0.00158645
ENSG00000100387	9978	RBX1	-1.08699	4.07521	5.8457e-08	1.39907e-05
ENSG00000065809	83641	FAM107B	-1.08691	8.7109	4.29372e-05	0.000848735
ENSG00000119900	79627	OGFRL1	-1.08511	6.25368	0.00184131	0.0103232
ENSG00000013725	923	CD6	-1.0851	3.93208	0.0150294	0.045532
ENSG00000203668	1122	CHML	-1.08496	3.39899	0.00046553	0.00409287
ENSG00000203668	23596	OPN3	-1.08496	3.39899	0.00046553	0.00409287
ENSG00000170540	23204	ARL6IP1	-1.08387	6.35308	3.06657e-05	0.000692175
ENSG00000197353	137797	LYPD2	-1.083	8.8821	0.00109247	0.00719626
ENSG00000029153	56938	BMAL2	-1.08276	5.06674	4.72612e-05	0.000882298
ENSG00000101084	55969	RAB5IF	-1.0827	3.49306	0.000426461	0.00386615
ENSG00000065833	4199	ME1	-1.0819	5.53923	0.0014284	0.00867666
ENSG00000251022	100499177	THAP9-AS1	-1.08043	5.18932	0.00183416	0.0102938
ENSG00000101752	57534	MIB1	-1.08017	5.94216	3.58964e-06	0.000202221
ENSG00000111863	84830	ADTRP	-1.07967	4.60192	0.0129565	0.0409214
ENSG00000096717	23411	SIRT1	-1.07925	4.16525	2.90511e-05	0.000675767
ENSG00000125249	5911	RAP2A	-1.07873	4.14864	1.18561e-05	0.000381166
ENSG00000182551	55256	ADI1	-1.0784	6.75656	3.80369e-06	0.000203016
ENSG00000198363	444	ASPH	-1.0767	7.1993	1.43563e-06	0.000124825
ENSG00000173744	3267	AGFG1	-1.07579	5.86231	6.27085e-07	7.76288e-05
ENSG00000177519	56475	RPRM	-1.07476	4.10974	0.00169496	0.00977628
ENSG00000156273	571	BACH1	-1.07404	5.11595	0.000261513	0.00276127
ENSG00000156273	100379661	GRIK1-AS2	-1.07404	5.11595	0.000261513	0.00276127
ENSG00000237807	100507516	LINC02984	-1.07397	3.64615	0.0107965	0.035767
ENSG00000153936	9653	HS2ST1	-1.07128	4.30569	3.45841e-06	0.000198123
ENSG00000105829	10282	BET1	-1.07088	4.30673	4.42062e-06	0.000217398
ENSG00000173221	2745	GLRX	-1.07077	5.74131	0.0027526	0.013763
ENSG00000179021	285237	C3orf38	-1.06969	4.9702	5.03218e-06	0.000235017
ENSG00000164463	153222	CREBRF	-1.06841	5.04551	0.00036289	0.00348026
ENSG00000083799	1540	CYLD	-1.06751	6.44787	7.35959e-06	0.00029034
ENSG00000077458	143684	FAM76B	-1.06744	4.67196	1.45043e-05	0.000441276
ENSG00000132274	10346	TRIM22	-1.06739	7.95133	0.00572859	0.0229016
ENSG00000161381	57125	PLXDC1	-1.06691	4.14841	0.00842583	0.0300718
ENSG00000163867	9204	ZMYM6	-1.06678	3.5939	2.71496e-05	0.000645932
ENSG00000181904	134553	C5orf24	-1.06644	5.0389	1.77028e-05	0.000499109
ENSG00000196776	961	CD47	-1.06621	6.88497	4.3343e-05	0.000848735
ENSG00000133639	694	BTG1	-1.06615	7.39143	6.69309e-05	0.00112281
ENSG00000170385	7779	SLC30A1	-1.06384	5.10597	1.00057e-05	0.000353315
ENSG00000112812	10279	PRSS16	-1.06357	2.90415	0.0023037	0.0121102
ENSG00000180155	66004	LYNX1	-1.06015	6.85623	4.28556e-05	0.000848735
ENSG00000166200	9318	COPS2	-1.05982	5.46906	2.49769e-05	0.000613301
ENSG00000157224	9069	CLDN12	-1.05953	5.99989	4.71563e-06	0.000227475
ENSG00000146476	79624	ARMT1	-1.05945	4.76368	0.000101549	0.0014569
ENSG00000111276	1027	CDKN1B	-1.05893	5.66061	1.62089e-06	0.000133757
ENSG00000147050	7403	KDM6A	-1.05837	5.7608	1.34923e-05	0.000418766
ENSG00000198945	84456	L3MBTL3	-1.05817	3.36149	0.000240571	0.00260659
ENSG00000134108	55207	ARL8B	-1.05809	5.81868	2.97862e-05	0.000685197
ENSG00000164603	154743	BMT2	-1.05576	3.66094	3.61183e-05	0.000759662
ENSG00000124279	79072	FASTKD3	-1.05572	2.98776	8.42484e-05	0.00130281
ENSG00000163320	8545	CGGBP1	-1.05524	6.21229	0.000100154	0.00144787
ENSG00000163291	152559	PAQR3	-1.054	4.10278	5.40581e-06	0.000242951
ENSG00000156017	138199	CARNMT1	-1.05379	3.95505	2.55419e-05	0.000623779
ENSG00000101846	412	STS	-1.05284	5.73043	0.000476344	0.00415403
ENSG00000154640	10950	BTG3	-1.05215	5.38902	0.000127743	0.00169235
ENSG00000234602	345643	MCIDAS	-1.05193	4.4262	0.0014428	0.00873464
ENSG00000140853	84166	NLRC5	-1.05091	7.26699	0.00961485	0.0329783
ENSG00000082269	57579	FAM135A	-1.04993	5.1806	0.000148156	0.00186096
ENSG00000120159	79886	CAAP1	-1.04816	4.91608	6.23203e-08	1.42806e-05
ENSG00000196911	3841	KPNA5	-1.04747	3.99311	0.000294254	0.00299656
ENSG00000157613	90993	CREB3L1	-1.04712	7.28667	0.000428909	0.00388181
ENSG00000149573	10205	MPZL2	-1.04626	7.5707	0.000453745	0.00402871
ENSG00000164620	285613	RELL2	-1.04538	3.20411	6.28937e-05	0.00107129
ENSG00000182400	122553	TRAPPC6B	-1.04415	4.55297	8.22026e-05	0.00128308
ENSG00000196126	3123	HLA-DRB1	-1.04384	9.00447	0.0122901	0.0393506
ENSG00000178177	254251	LCORL	-1.04263	3.61884	3.56e-05	0.000757732
ENSG00000105855	3696	ITGB8	-1.04152	6.65478	6.72777e-05	0.00112655
ENSG00000106299	8976	WASL	-1.04054	6.45356	9.24321e-07	9.62476e-05
ENSG00000152778	24138	IFIT5	-1.03681	5.00066	0.00156401	0.00925514
ENSG00000136111	9882	TBC1D4	-1.03675	4.26379	1.11896e-05	0.000369669
ENSG00000123575	139231	FAM199X	-1.03674	5.53387	4.62639e-06	0.000224443
ENSG00000150687	11098	PRSS23	-1.03584	9.61227	0.000386385	0.00361544
ENSG00000162601	114803	MYSM1	-1.03303	6.02653	0.000166715	0.00199502
ENSG00000136240	11014	KDELR2	-1.03264	7.4173	2.07682e-07	3.44113e-05
ENSG00000143153	481	ATP1B1	-1.03239	9.51048	0.000128426	0.00169503
ENSG00000149798	10435	CDC42EP2	-1.03234	4.47783	0.00558342	0.022505
ENSG00000106541	10551	AGR2	-1.03213	10.4163	3.02058e-05	0.000689423
ENSG00000095574	64376	IKZF5	-1.03113	4.18366	1.0194e-05	0.00035762
ENSG00000196233	84458	LCOR	-1.03107	5.85106	5.41394e-06	0.000242951
ENSG00000164109	4085	MAD2L1	-1.03101	3.3188	0.00125525	0.00796177
ENSG00000125347	3659	IRF1	-1.0305	8.30273	0.00323125	0.0153713
ENSG00000087502	51290	ERGIC2	-1.02896	5.31499	5.41776e-05	0.000976788
ENSG00000064763	55711	FAR2	-1.02852	5.29065	0.000286185	0.00294812
ENSG00000157214	261729	STEAP2	-1.02833	5.34391	0.00783239	0.0285468
ENSG00000163607	29083	GTPBP8	-1.02814	3.99971	7.40595e-05	0.00119943
ENSG00000175087	149420	PDIK1L	-1.02403	4.42886	0.000458339	0.00405947
ENSG00000184731	642273	FAM110C	-1.02358	3.68492	1.82393e-05	0.000506283
ENSG00000164342	7098	TLR3	-1.02314	4.88635	0.000592662	0.00476341
ENSG00000147650	29967	LRP12	-1.02289	3.92108	0.00109111	0.00719612
ENSG00000108510	9969	MED13	-1.02246	6.38496	3.60543e-06	0.000202221
ENSG00000115525	8869	ST3GAL5	-1.01989	3.69195	0.00363185	0.0167444
ENSG00000088035	29929	ALG6	-1.01952	3.88604	0.000141433	0.00180264
ENSG00000115808	6801	STRN	-1.01924	5.77782	6.28406e-06	0.000263344
ENSG00000124783	6745	SSR1	-1.01916	6.7445	1.85928e-05	0.000509528
ENSG00000116954	64121	RRAGC	-1.01708	4.58431	1.61117e-05	0.000473136
ENSG00000006652	3475	IFRD1	-1.01706	5.00324	0.00102924	0.00691942
ENSG00000139921	81542	TMX1	-1.01676	5.40709	5.08895e-06	0.000235017
ENSG00000136156	9445	ITM2B	-1.01613	9.3141	1.81573e-05	0.000505438
ENSG00000112531	9444	QKI	-1.01592	5.23904	3.59336e-05	0.000758833
ENSG00000133731	3612	IMPA1	-1.0155	5.85331	2.58415e-05	0.000626004
ENSG00000070367	10640	EXOC5	-1.01518	5.54925	0.000120147	0.00163228
ENSG00000058272	4659	PPP1R12A	-1.015	5.56171	1.1074e-05	0.000369669
ENSG00000184254	220	ALDH1A3	-1.01404	6.02485	0.000549357	0.0045303
ENSG00000118496	84085	FBXO30	-1.0109	4.05514	5.13707e-05	0.000941727
ENSG00000149289	85463	ZC3H12C	-1.0101	4.74563	5.39258e-05	0.000975939
ENSG00000186517	257106	ARHGAP30	-1.00966	5.17079	0.00460746	0.0197777
ENSG00000114251	7474	WNT5A	-1.00964	3.47855	0.0165209	0.0487081
ENSG00000214814	654463	FER1L6	-1.00901	7.93485	0.00150805	0.00903548
ENSG00000036054	55773	TBC1D23	-1.00591	5.03833	0.00011735	0.00160767
ENSG00000120756	5357	PLS1	-1.00554	7.04776	2.3387e-06	0.000162584
ENSG00000048405	168850	ZNF800	-1.00528	4.7265	2.02044e-05	0.000535963
ENSG00000027075	5583	PRKCH	-1.00501	4.74673	0.000102838	0.00147283
ENSG00000034677	25897	RNF19A	-1.00453	6.78034	0.000128725	0.0016969
ENSG00000139514	6541	SLC7A1	-1.00326	6.40844	2.58158e-05	0.000626004
ENSG00000188994	23036	ZNF292	-1.00101	5.44565	0.000228937	0.00251036
ENSG00000123983	2181	ACSL3	-1.00083	7.30078	0.000197334	0.00224186
ENSG00000162980	26225	ARL5A	-1.00014	5.18561	1.52452e-05	0.000454822
ENSG00000104388	5862	RAB2A	-0.998398	6.96756	2.65436e-07	4.20403e-05
ENSG00000109787	51274	KLF3	-0.997706	7.70777	0.000443349	0.00397906
ENSG00000198862	26046	LTN1	-0.995785	5.4987	6.07799e-05	0.00105022
ENSG00000136051	23325	WASHC4	-0.994564	5.54224	0.000326771	0.00324063
ENSG00000135750	3775	KCNK1	-0.994363	5.69972	8.74526e-06	0.000322378
ENSG00000114405	57415	C3orf14	-0.993293	3.47673	0.000469791	0.0041102
ENSG00000172469	79694	MANEA	-0.99327	3.922	1.27109e-05	0.000401454
ENSG00000239672	4830	NME1	-0.993125	3.49729	1.42097e-06	0.000124825
ENSG00000136536	64844	MARCHF7	-0.992386	6.21714	4.88665e-05	0.000906121
ENSG00000197969	23230	VPS13A	-0.992057	6.22746	0.000363947	0.00348162
ENSG00000135655	9958	USP15	-0.99014	6.29299	0.000282982	0.00292768
ENSG00000104671	10671	DCTN6	-0.9877	4.15626	3.88198e-06	0.000203016
ENSG00000125354	23157	SEPTIN6	-0.986859	4.3815	0.00768985	0.0281412
ENSG00000165338	143279	HECTD2	-0.986303	4.1386	3.23954e-05	0.000716423
ENSG00000092140	55632	G2E3	-0.986057	3.72792	9.7694e-05	0.00143542
ENSG00000138018	85465	SELENOI	-0.986041	5.66059	0.000521128	0.00436435
ENSG00000171055	9637	FEZ2	-0.985317	4.70439	3.19112e-05	0.000708959
ENSG00000145349	817	CAMK2D	-0.985295	5.70234	4.41002e-06	0.000217398
ENSG00000061676	10787	NCKAP1	-0.983316	7.47962	5.75737e-05	0.00101985
ENSG00000146386	58527	ABRACL	-0.983271	4.67765	3.7251e-06	0.000203016
ENSG00000083312	3842	TNPO1	-0.983097	6.6111	3.93999e-05	0.000803668
ENSG00000115825	23683	PRKD3	-0.982683	5.10652	2.70743e-05	0.000645932
ENSG00000099246	22931	RAB18	-0.981372	6.33635	1.37689e-05	0.000423688
ENSG00000146802	64418	TMEM168	-0.979471	4.9545	4.16174e-05	0.00083495
ENSG00000173530	8793	TNFRSF10D	-0.978999	4.36727	0.00669026	0.0254936
ENSG00000159200	1827	RCAN1	-0.976775	4.41177	0.000447126	0.00400277
ENSG00000103460	27324	TOX3	-0.976161	4.65502	1.5031e-05	0.000450929
ENSG00000145730	5066	PAM	-0.975411	6.73313	0.000394836	0.00364257
ENSG00000154359	91694	LONRF1	-0.975289	4.05345	6.83747e-05	0.00113182
ENSG00000140471	55180	LINS1	-0.974519	4.31037	0.000152752	0.00189314
ENSG00000120137	79646	PANK3	-0.97446	5.9028	5.68492e-06	0.000248544
ENSG00000106546	196	AHR	-0.974191	7.43392	4.77476e-05	0.000889692
ENSG00000113575	5515	PPP2CA	-0.974166	6.57147	2.49636e-06	0.000169305
ENSG00000059758	5128	CDK17	-0.97291	5.24255	1.92992e-06	0.000145351
ENSG00000137962	9411	ARHGAP29	-0.972177	4.11944	0.000813033	0.00589654
ENSG00000060749	79832	QSER1	-0.971889	4.74979	1.61226e-05	0.000473136
ENSG00000112697	55754	TMEM30A	-0.9717	7.31939	1.57032e-05	0.000465904
ENSG00000144228	339745	SPOPL	-0.970965	5.01806	7.51328e-06	0.000295321
ENSG00000168769	54790	TET2	-0.970237	7.07355	0.000175524	0.00206826
ENSG00000165029	19	ABCA1	-0.970102	4.92601	0.0166043	0.0488601
ENSG00000156531	84295	PHF6	-0.969135	4.69155	0.000333595	0.00329314
ENSG00000186298	5501	PPP1CC	-0.968814	6.86759	2.38359e-05	0.000598397
ENSG00000119314	9991	PTBP3	-0.967714	7.4064	9.22969e-06	0.000334693
ENSG00000107281	56654	NPDC1	-0.967672	4.71592	0.00411914	0.0182115
ENSG00000242247	26286	ARFGAP3	-0.967481	6.30651	5.98998e-05	0.00104134
ENSG00000076053	10179	RBM7	-0.966113	4.11066	2.07689e-05	0.000542915
ENSG00000164574	55568	GALNT10	-0.964936	5.06985	0.000115794	0.00159272
ENSG00000164597	10466	COG5	-0.964498	6.56603	7.64671e-05	0.00122007
ENSG00000203697	388743	CAPN8	-0.964383	5.10844	0.00050776	0.00431957
ENSG00000048052	9734	HDAC9	-0.963346	5.02017	0.000685801	0.00524207
ENSG00000105849	221830	POLR1F	-0.963257	3.97054	8.45202e-05	0.00130281
ENSG00000075303	55972	SLC25A40	-0.962921	4.54525	2.98382e-05	0.000685197
ENSG00000163754	2992	GYG1	-0.960831	5.34492	4.80348e-06	0.000227901
ENSG00000204388	3304	HSPA1B	-0.960737	7.40803	0.00599814	0.0236717
ENSG00000116001	7072	TIA1	-0.959354	6.5662	9.37068e-05	0.00139395
ENSG00000158092	4690	NCK1	-0.958971	5.4148	0.000260006	0.00275009
ENSG00000197780	6884	TAF13	-0.958911	4.1482	4.59539e-05	0.000872689
ENSG00000122482	84146	ZNF644	-0.958861	5.51845	0.000129678	0.00170444
ENSG00000178202	143888	POGLUT3	-0.958789	5.52344	0.00111785	0.00731422
ENSG00000196083	3556	IL1RAP	-0.958771	4.85471	0.000204445	0.00230563
ENSG00000100196	11015	KDELR3	-0.957938	3.92085	0.00105176	0.00703131
ENSG00000035664	23604	DAPK2	-0.957806	4.56755	0.00254909	0.0130298
ENSG00000215717	56900	TMEM167B	-0.957712	5.74045	9.67114e-06	0.000344894
ENSG00000181744	205428	DIPK2A	-0.957497	4.94652	0.0013699	0.00845364
ENSG00000183742	346389	MACC1	-0.957464	7.06643	0.00689431	0.0260807
ENSG00000137955	5876	RABGGTB	-0.957253	5.83319	2.49762e-05	0.000613301
ENSG00000012660	60481	ELOVL5	-0.9555	7.26529	0.000750975	0.00557517
ENSG00000162702	23528	ZNF281	-0.954645	3.99907	0.000595848	0.00477842
ENSG00000072364	27125	AFF4	-0.953674	6.99363	1.13295e-05	0.000370879
ENSG00000165195	5277	PIGA	-0.953504	4.40905	0.000583332	0.00471304
ENSG00000075420	64778	FNDC3B	-0.95269	6.08785	0.000193094	0.00221001
ENSG00000254685	8790	FPGT	-0.952655	3.97657	0.000264448	0.0027795
ENSG00000134851	55858	TMEM165	-0.952637	7.21044	8.77465e-05	0.00133479
ENSG00000153246	22925	PLA2R1	-0.951974	5.52274	0.000352008	0.00343088
ENSG00000179454	54813	KLHL28	-0.95184	4.55677	0.000132546	0.00172615
ENSG00000096968	3717	JAK2	-0.950135	5.31576	0.000512589	0.0043442
ENSG00000120519	84068	SLC10A7	-0.949845	3.9356	9.05434e-06	0.00033056
ENSG00000101911	5634	PRPS2	-0.949734	6.20143	3.31219e-05	0.000726445
ENSG00000072415	64398	PALS1	-0.948645	5.1128	1.32413e-05	0.000414561
ENSG00000164244	133619	PRRC1	-0.948379	6.23514	8.85727e-07	9.53928e-05
ENSG00000101935	9949	AMMECR1	-0.94793	4.63276	9.72658e-05	0.00143444
ENSG00000163848	7707	ZNF148	-0.947613	5.28367	2.3918e-06	0.000165126
ENSG00000166710	567	B2M	-0.947461	12.3246	4.64753e-05	0.000875069
ENSG00000001561	22875	ENPP4	-0.947439	7.0043	0.000899171	0.00631707
ENSG00000135838	80896	NPL	-0.94652	3.26851	0.000246011	0.00264655
ENSG00000065154	4942	OAT	-0.946217	8.2154	5.21027e-05	0.000951095
ENSG00000120992	10434	LYPLA1	-0.945867	5.20154	1.47943e-05	0.00044507
ENSG00000173276	49854	ZBTB21	-0.945083	4.89274	4.3106e-05	0.000848735
ENSG00000101745	23253	ANKRD12	-0.943538	5.80464	0.0014308	0.00867666
ENSG00000105887	136319	MTPN	-0.943159	6.82023	1.75575e-06	0.00014007
ENSG00000138660	55435	AP1AR	-0.942939	4.50802	2.74729e-06	0.000176121
ENSG00000094975	51430	SUCO	-0.941526	5.64623	2.8327e-05	0.000664665
ENSG00000138376	580	BARD1	-0.941084	3.41115	0.000114956	0.00158728
ENSG00000168300	115294	PCMTD1	-0.941035	5.74531	1.03086e-05	0.000359301
ENSG00000166225	10818	FRS2	-0.93997	4.94128	2.91148e-05	0.000675789
ENSG00000115159	2820	GPD2	-0.939888	6.44506	1.965e-05	0.000529077
ENSG00000146676	5814	PURB	-0.939753	5.78848	3.16366e-06	0.000187212
ENSG00000118260	1385	CREB1	-0.939734	5.48393	6.62036e-06	0.000267767
ENSG00000241399	9936	CD302	-0.93901	3.00606	0.00060729	0.00481839
ENSG00000166278	717	C2	-0.938444	3.51955	0.00489094	0.0205202
ENSG00000198252	6815	STYX	-0.938353	4.4068	6.52253e-05	0.00110279
ENSG00000172007	83452	RAB33B	-0.938219	3.39788	2.58622e-06	0.000171936
ENSG00000163281	132789	GNPDA2	-0.937578	3.96568	3.8582e-05	0.00079247
ENSG00000163428	116064	LRRC58	-0.937287	5.19279	1.73825e-05	0.000491365
ENSG00000116473	5906	RAP1A	-0.936747	5.54105	8.40054e-06	0.000316342
ENSG00000065243	5586	PKN2	-0.936586	6.49381	9.76127e-05	0.00143542
ENSG00000198682	9060	PAPSS2	-0.935787	5.40368	0.00723221	0.0269239
ENSG00000165832	142940	TRUB1	-0.935381	4.34807	6.03484e-06	0.000256898
ENSG00000111224	57097	PARP11	-0.934357	3.93131	4.16312e-05	0.00083495
ENSG00000198780	26049	FAM169A	-0.934347	4.12741	0.000603023	0.00481435
ENSG00000143756	23219	FBXO28	-0.934267	5.49629	1.46858e-05	0.000443378
ENSG00000138449	30061	SLC40A1	-0.934118	6.04365	0.00571633	0.0228696
ENSG00000189171	6284	S100A13	-0.933824	5.62001	1.04784e-05	0.000359484
ENSG00000111726	55907	CMAS	-0.93347	6.2113	7.09553e-06	0.000281988
ENSG00000172175	10892	MALT1	-0.933394	4.31984	0.000304128	0.00307844
ENSG00000183291	9403	SELENOF	-0.93261	7.1122	2.15724e-06	0.00015593
ENSG00000204642	3134	HLA-F	-0.930422	7.93522	0.0101959	0.0343478
ENSG00000123505	262	AMD1	-0.929937	6.78342	0.00471104	0.0200704
ENSG00000175130	65108	MARCKSL1	-0.929888	6.2536	0.0100497	0.0340148
ENSG00000148908	6001	RGS10	-0.929468	3.6032	0.00615281	0.0240879
ENSG00000125285	11166	SOX21	-0.927919	5.28067	3.41063e-05	0.000737599
ENSG00000110934	51411	BIN2	-0.927041	3.85397	0.00658171	0.025208
ENSG00000153179	283349	RASSF3	-0.926978	4.54022	0.000665989	0.00514172
ENSG00000150893	341640	FREM2	-0.926828	5.36528	0.00207587	0.0112687
ENSG00000211455	23012	STK38L	-0.926378	5.33053	6.29645e-05	0.00107129
ENSG00000100219	7494	XBP1	-0.926257	9.48664	0.000639624	0.00500584
ENSG00000133321	5920	PLAAT4	-0.92558	7.61899	0.00278989	0.0138914
ENSG00000147526	6867	TACC1	-0.925498	5.69184	7.92426e-05	0.00125138
ENSG00000160551	57551	TAOK1	-0.925076	6.50254	1.77639e-05	0.000499524
ENSG00000133740	1875	E2F5	-0.924117	3.58408	0.00075069	0.00557517
ENSG00000111725	5564	PRKAB1	-0.923857	6.47796	1.96996e-06	0.000146035
ENSG00000170185	84640	USP38	-0.923537	5.13553	8.11765e-06	0.00031224
ENSG00000215301	1654	DDX3X	-0.922924	8.85522	0.00148364	0.00891179
ENSG00000074410	771	CA12	-0.92234	7.04483	0.0104164	0.0348509
ENSG00000189050	51136	RNFT1	-0.922323	3.33658	0.000938719	0.00650161
ENSG00000104763	427	ASAH1	-0.92224	8.19961	0.000169879	0.00201954
ENSG00000128311	7263	TST	-0.921486	5.34951	0.00200512	0.0109899
ENSG00000136237	9771	RAPGEF5	-0.920642	4.27307	0.000697259	0.00528836
ENSG00000185950	8660	IRS2	-0.920359	5.71456	0.0145482	0.0444746
ENSG00000058063	23200	ATP11B	-0.920026	6.32964	5.73992e-06	0.000248544
ENSG00000126804	22890	ZBTB1	-0.919784	5.44592	0.000309245	0.00311559
ENSG00000132963	51371	POMP	-0.919573	6.2768	0.000160497	0.00194438
ENSG00000140299	663	BNIP2	-0.919377	5.9099	7.25392e-05	0.00118013
ENSG00000234745	3106	HLA-B	-0.918831	11.7626	0.00224756	0.0119301
ENSG00000136021	55681	SCYL2	-0.917172	6.17729	0.000193654	0.00221407
ENSG00000152785	651	BMP3	-0.917028	5.89733	0.00296328	0.0144617
ENSG00000176153	2877	GPX2	-0.916961	6.20423	0.00292851	0.014373
ENSG00000162642	148423	C1orf52	-0.91673	4.18753	2.1809e-06	0.000156589
ENSG00000068028	11186	RASSF1	-0.915834	4.47827	0.000146373	0.00185027
ENSG00000198898	830	CAPZA2	-0.915412	6.3554	6.35645e-06	0.000263504
ENSG00000111875	25842	ASF1A	-0.915211	4.34953	6.52152e-05	0.00110279
ENSG00000008282	6856	SYPL1	-0.912841	6.85738	7.8829e-05	0.00124911
ENSG00000051382	5291	PIK3CB	-0.912315	5.49864	4.46937e-05	0.000864185
ENSG00000134758	51444	RNF138	-0.91216	4.83922	8.46786e-05	0.00130281
ENSG00000100522	64841	GNPNAT1	-0.912035	5.81276	0.00410388	0.0181664
ENSG00000141429	2589	GALNT1	-0.910162	6.27618	6.78518e-06	0.000272309
ENSG00000221963	80830	APOL6	-0.909843	7.55403	0.00594031	0.0234926
ENSG00000052795	57600	FNIP2	-0.90839	4.53973	4.62004e-05	0.000874479
ENSG00000102243	51442	VGLL1	-0.906964	3.37464	0.0129534	0.0409214
ENSG00000131171	6451	SH3BGRL	-0.906889	6.18	0.000174283	0.00205815
ENSG00000217128	96459	FNIP1	-0.906289	4.64015	0.000220722	0.00244315
ENSG00000113369	57561	ARRDC3	-0.906177	6.89573	0.00152891	0.00910247
ENSG00000155100	51633	OTUD6B	-0.905939	3.45893	7.62026e-06	0.000297356
ENSG00000134265	8774	NAPG	-0.905272	5.35499	8.19457e-06	0.000314077
ENSG00000102158	84061	MAGT1	-0.904723	6.02376	6.10432e-05	0.00105022
ENSG00000154309	84976	DISP1	-0.904198	4.45241	0.000108507	0.00153161
ENSG00000111907	7164	TPD52L1	-0.904107	5.49761	0.00330224	0.0155988
ENSG00000019102	23584	VSIG2	-0.904008	6.73855	0.00151882	0.00907248
ENSG00000078140	3093	UBE2K	-0.903492	5.96377	6.36128e-06	0.000263504
ENSG00000136527	6434	TRA2B	-0.903332	6.98496	2.64275e-05	0.00063817
ENSG00000181472	57621	ZBTB2	-0.902052	3.91604	8.30042e-06	0.000315615
ENSG00000075089	64431	ACTR6	-0.900979	4.96399	0.00116054	0.0075069
ENSG00000206418	201475	RAB12	-0.900928	5.16667	8.80672e-05	0.00133778
ENSG00000184203	5504	PPP1R2	-0.900878	5.76922	9.89648e-05	0.00144107
ENSG00000008083	3720	JARID2	-0.899463	5.1796	0.000416688	0.00379994
ENSG00000117505	1810	DR1	-0.899022	5.50163	1.19343e-06	0.000113745
ENSG00000198142	65124	SOWAHC	-0.898794	4.41847	0.00371645	0.0169602
ENSG00000143815	3930	LBR	-0.898757	5.26191	0.000133444	0.00173156
ENSG00000102471	54602	NDFIP2	-0.89853	6.43958	5.77971e-06	0.00024899
ENSG00000156127	10538	BATF	-0.89817	3.32227	0.0109845	0.0362185
ENSG00000164379	94234	FOXQ1	-0.896311	5.20357	0.015187	0.0458677
ENSG00000121749	64786	TBC1D15	-0.895792	5.73853	4.98536e-05	0.000920966
ENSG00000120805	400	ARL1	-0.89442	7.1204	3.87216e-06	0.000203016
ENSG00000159256	23515	MORC3	-0.894184	5.9617	1.8834e-05	0.000512229
ENSG00000076770	55796	MBNL3	-0.894029	4.53658	2.58656e-05	0.000626004
ENSG00000116747	6738	RO60	-0.893321	4.57101	4.5721e-06	0.000222812
ENSG00000123091	26994	RNF11	-0.893184	6.22804	7.87433e-07	8.72612e-05
ENSG00000165092	216	ALDH1A1	-0.891955	10.6728	0.00195513	0.0108039
ENSG00000134352	3572	IL6ST	-0.891433	6.94409	0.000558012	0.00457019
ENSG00000132356	5562	PRKAA1	-0.889557	7.22403	2.68835e-06	0.000173374
ENSG00000065135	2773	GNAI3	-0.889387	6.20617	8.6101e-06	0.000320868
ENSG00000145725	23262	PPIP5K2	-0.888688	5.70012	0.000448921	0.0040057
ENSG00000177683	168451	THAP5	-0.888669	3.79154	0.00220973	0.0117874
ENSG00000137462	7097	TLR2	-0.888318	4.72558	0.00834325	0.0298726
ENSG00000108239	23232	TBC1D12	-0.888235	3.50838	5.60725e-05	0.000998184
ENSG00000197930	30001	ERO1A	-0.887615	6.75612	0.00423382	0.0185585
ENSG00000136048	55332	DRAM1	-0.887614	4.83293	0.00201777	0.0110312
ENSG00000198744	107075270	MTCO3P12	-0.887344	9.44131	0.000864531	0.00616622
ENSG00000162073	124222	PAQR4	-0.887314	6.09426	0.000275405	0.0028685
ENSG00000124333	6845	VAMP7	-0.887046	5.1779	4.47908e-05	0.00086451
ENSG00000151414	140609	NEK7	-0.886961	5.81389	0.000206374	0.00232251
ENSG00000085719	8895	CPNE3	-0.886896	7.11614	0.000169648	0.00201954
ENSG00000150540	3176	HNMT	-0.886187	4.91376	0.000506855	0.00431806
ENSG00000065613	9748	SLK	-0.885457	7.40246	0.00031914	0.00318549
ENSG00000156802	29028	ATAD2	-0.885453	4.89065	0.00100468	0.00680099
ENSG00000258441	283624	LINC00641	-0.884395	3.26913	0.00271517	0.0136246
ENSG00000114331	23527	ACAP2	-0.883862	6.33465	0.000107576	0.00152344
ENSG00000177570	401474	SAMD12	-0.883361	5.50633	0.000189137	0.00217629
ENSG00000106665	7461	CLIP2	-0.882869	3.87976	0.00103835	0.00696759
ENSG00000147689	84985	FAM83A	-0.882658	4.21557	0.0168094	0.0493718
ENSG00000175895	79666	PLEKHF2	-0.882439	5.93516	0.00106714	0.00709887
ENSG00000140367	92912	UBE2Q2	-0.881938	5.02013	7.70814e-07	8.64757e-05
ENSG00000197323	51592	TRIM33	-0.881761	6.2966	0.000156814	0.00190835
ENSG00000139324	160418	TMTC3	-0.881434	5.80594	0.000607555	0.00481839
ENSG00000165417	2957	GTF2A1	-0.881157	5.17114	2.71687e-05	0.000645932
ENSG00000204839	642475	MROH6	-0.880719	4.23058	0.00973627	0.0332465
ENSG00000135272	29969	MDFIC	-0.880458	5.72783	0.000378309	0.00355842
ENSG00000149212	143686	SESN3	-0.879983	4.51318	0.00090647	0.00634352
ENSG00000132294	23167	EFR3A	-0.879423	6.52541	2.76472e-05	0.000653212
ENSG00000152749	160897	GPR180	-0.879418	4.29498	0.000335572	0.00330962
ENSG00000085274	55892	MYNN	-0.879142	4.46315	1.65564e-05	0.000479335
ENSG00000198189	51170	HSD17B11	-0.879066	5.50914	4.67668e-05	0.000875963
ENSG00000162819	148362	BROX	-0.878728	5.98278	6.84804e-06	0.000273161
ENSG00000115738	3398	ID2	-0.878027	5.67845	0.00310008	0.0149186
ENSG00000084073	10269	ZMPSTE24	-0.877278	6.27442	0.000105762	0.00150668
ENSG00000075711	1739	DLG1	-0.877129	6.65462	5.14146e-05	0.000941727
ENSG00000198355	415116	PIM3	-0.876243	7.31818	0.0101066	0.034143
ENSG00000080371	23011	RAB21	-0.876219	4.86498	0.000100737	0.00145434
ENSG00000154217	26207	PITPNC1	-0.87449	4.46077	0.00105818	0.00706548
ENSG00000125257	10257	ABCC4	-0.874229	5.57869	0.00540578	0.0220086
ENSG00000155959	7411	VBP1	-0.87209	4.53119	0.000119144	0.00162428
ENSG00000120802	7112	TMPO	-0.87023	6.10069	2.26898e-05	0.000576343
ENSG00000132432	23480	SEC61G	-0.870069	4.98488	2.42161e-05	0.000605122
ENSG00000134987	134430	WDR36	-0.869586	4.68158	3.54502e-05	0.000756037
ENSG00000170899	2941	GSTA4	-0.869292	4.34592	0.0154537	0.046447
ENSG00000129534	55320	MIS18BP1	-0.868934	4.78104	0.00275737	0.013774
ENSG00000116750	51377	UCHL5	-0.868872	4.36546	9.36612e-05	0.00139395
ENSG00000119514	79695	GALNT12	-0.868125	6.86287	5.39329e-06	0.000242951
ENSG00000146278	10957	PNRC1	-0.867597	6.51837	0.0118806	0.0383469
ENSG00000082438	22837	COBLL1	-0.867416	5.45488	0.0014193	0.00863118
ENSG00000198933	9755	TBKBP1	-0.866813	3.9208	0.00169269	0.00977628
ENSG00000198833	51465	UBE2J1	-0.866796	6.71028	1.88278e-06	0.00014484
ENSG00000164933	81034	SLC25A32	-0.866026	3.98506	0.000130195	0.00170582
ENSG00000198121	1902	LPAR1	-0.865847	3.95745	6.07977e-05	0.00105022
ENSG00000057149	6317	SERPINB3	-0.864973	10.4675	0.0058064	0.0231268
ENSG00000136783	25934	NIPSNAP3A	-0.862712	4.8632	3.02547e-05	0.000689423
ENSG00000168214	3516	RBPJ	-0.861847	6.41398	0.000221844	0.00245303
ENSG00000153975	221302	ZUP1	-0.861408	3.3093	0.000110794	0.00155185
ENSG00000168615	8754	ADAM9	-0.86105	7.48463	6.45748e-05	0.00109523
ENSG00000177565	79718	TBL1XR1	-0.861026	6.45227	5.56999e-05	0.000996492
ENSG00000180233	223082	ZNRF2	-0.860503	4.45663	6.11137e-08	1.42806e-05
ENSG00000068366	2182	ACSL4	-0.86029	5.06901	0.000213228	0.00237729
ENSG00000143622	6016	RIT1	-0.85984	5.3481	0.000137608	0.00176433
ENSG00000167799	254552	NUDT8	-0.85962	3.1404	5.92719e-05	0.00103798
ENSG00000112559	4188	MDFI	-0.858718	3.79964	0.00574858	0.0229644
ENSG00000219545	729852	UMAD1	-0.858411	3.57619	7.23325e-05	0.00117855
ENSG00000168899	10791	VAMP5	-0.857332	4.29512	0.010146	0.0342548
ENSG00000136603	6498	SKIL	-0.856254	5.62867	0.000826666	0.00597129
ENSG00000161798	362	AQP5	-0.854749	8.14611	0.00193313	0.0107043
ENSG00000117906	5955	RCN2	-0.854653	5.99612	1.17992e-05	0.000380803
ENSG00000066422	27107	ZBTB11	-0.854469	4.74427	3.26433e-05	0.000720427
ENSG00000138764	901	CCNG2	-0.854333	5.21715	0.000267892	0.00280661
ENSG00000137944	56267	KYAT3	-0.854262	4.72249	0.000556815	0.00457019
ENSG00000134852	9575	CLOCK	-0.853665	5.54885	2.06929e-05	0.000542244
ENSG00000095321	1384	CRAT	-0.853575	5.61526	3.81119e-05	0.000791973
ENSG00000101782	8780	RIOK3	-0.852847	6.92915	0.000107645	0.00152344
ENSG00000074695	3998	LMAN1	-0.852534	7.07299	0.000156665	0.00190835
ENSG00000168288	27249	MMADHC	-0.852193	6.49818	4.22708e-06	0.000212737
ENSG00000181915	84890	ADO	-0.851463	4.29893	5.55525e-05	0.000995509
ENSG00000127124	59269	HIVEP3	-0.850647	3.24648	0.00124908	0.00794671
ENSG00000138448	3685	ITGAV	-0.850607	6.17156	2.29573e-05	0.000581764
ENSG00000162971	129450	TYW5	-0.85009	3.4752	0.000224922	0.00247788
ENSG00000119048	7320	UBE2B	-0.8499	5.50674	2.21976e-05	0.000567356
ENSG00000053770	55745	AP5M1	-0.849797	5.41312	1.62542e-05	0.000475699
ENSG00000057663	9474	ATG5	-0.848755	5.51788	5.46383e-06	0.000244172
ENSG00000213341	1147	CHUK	-0.848608	5.03955	6.4169e-05	0.00109006
ENSG00000153317	50807	ASAP1	-0.848474	4.26234	0.000359487	0.00346222
ENSG00000185015	377677	CA13	-0.848317	4.3038	0.00116919	0.00754886
ENSG00000181450	339500	ZNF678	-0.848164	3.33021	0.000789917	0.00576773
ENSG00000019582	972	CD74	-0.847521	11.2854	0.00958962	0.0329653
ENSG00000187522	51182	HSPA14	-0.847423	5.42079	1.36244e-05	0.000420927
ENSG00000169446	93380	MMGT1	-0.847182	4.78099	0.00011532	0.00159027
ENSG00000115514	10190	TXNDC9	-0.846447	4.71424	0.000720405	0.00540304
ENSG00000153933	8526	DGKE	-0.845415	3.61672	0.000721067	0.00540424
ENSG00000122068	84248	FYTTD1	-0.844858	5.84927	1.04808e-05	0.000359484
ENSG00000123595	9367	RAB9A	-0.844821	5.21274	2.06326e-05	0.000542244
ENSG00000136379	58489	ABHD17C	-0.844506	5.45674	1.0157e-05	0.000357485
ENSG00000172869	1657	DMXL1	-0.844389	5.7643	3.53774e-05	0.000755982
ENSG00000213096	9534	ZNF254	-0.843502	4.33062	0.000800366	0.00582428
ENSG00000130881	4037	LRP3	-0.842754	3.29426	0.000312154	0.0031361
ENSG00000120910	5533	PPP3CC	-0.841865	4.99774	2.75849e-05	0.000653212
ENSG00000113597	80006	TRAPPC13	-0.841401	4.59271	1.67508e-05	0.000481084
ENSG00000095564	9044	BTAF1	-0.841213	6.92745	0.000354702	0.00345089
ENSG00000150054	143098	MPP7	-0.840478	5.96272	0.00112365	0.00732311
ENSG00000143776	8476	CDC42BPA	-0.839799	6.87632	0.000587483	0.00472984
ENSG00000003249	79007	DBNDD1	-0.838971	3.70342	0.0140449	0.0433334
ENSG00000169018	10116	FEM1B	-0.838902	6.03692	4.2964e-06	0.000213236
ENSG00000134470	3601	IL15RA	-0.838388	3.53611	0.00366438	0.0168153
ENSG00000170786	195814	SDR16C5	-0.837887	5.84297	0.00336539	0.0157725
ENSG00000176624	51320	MEX3C	-0.837505	4.90495	6.6401e-05	0.00111818
ENSG00000103316	1428	CRYM	-0.837456	7.14837	0.0107338	0.0356582
ENSG00000173674	1964	EIF1AX	-0.837356	4.48888	0.000479059	0.00416758
ENSG00000140563	55784	MCTP2	-0.837263	5.20463	5.94926e-05	0.00103988
ENSG00000107854	80351	TNKS2	-0.837063	7.1076	2.10599e-05	0.000547232
ENSG00000147854	115426	UHRF2	-0.837046	5.32333	0.000155413	0.00190474
ENSG00000129317	83448	PUS7L	-0.83701	3.3878	0.00294435	0.0144271
ENSG00000132485	9406	ZRANB2	-0.836889	5.99157	0.000444425	0.0039854
ENSG00000122958	9559	VPS26A	-0.836211	5.72044	1.0253e-05	0.000358523
ENSG00000122591	84668	HYCC1	-0.835363	3.24207	0.00376042	0.0170813
ENSG00000102189	8411	EEA1	-0.835312	4.98414	0.000223499	0.00246871
ENSG00000142867	8915	BCL10	-0.834294	4.93592	0.000927549	0.00644497
ENSG00000145743	64839	FBXL17	-0.832387	4.87334	2.86823e-05	0.00067154
ENSG00000146247	55023	PHIP	-0.832217	6.52689	3.78633e-05	0.000790242
ENSG00000171124	2525	FUT3	-0.832153	6.85677	0.00133619	0.00831839
ENSG00000166750	162394	SLFN5	-0.831956	7.90888	0.00542153	0.022021
ENSG00000172845	6670	SP3	-0.831138	6.84384	3.45416e-05	0.000742542
ENSG00000081087	28962	OSTM1	-0.831104	4.6306	6.24776e-05	0.00106638
ENSG00000196449	79693	YRDC	-0.830942	3.90345	3.56382e-06	0.000202221
ENSG00000162704	10092	ARPC5	-0.830824	6.44532	0.000346405	0.00339162
ENSG00000138434	6744	ITPRID2	-0.830787	7.72063	0.00015664	0.00190835
ENSG00000177380	8541	PPFIA3	-0.830645	3.565	0.00163917	0.00953814
ENSG00000165449	220963	SLC16A9	-0.830124	5.83562	0.0116458	0.0377817
ENSG00000129038	4016	LOXL1	-0.829472	4.61709	0.0028023	0.0139339
ENSG00000137500	60492	CCDC90B	-0.829231	4.5999	0.000233709	0.00255278
ENSG00000164543	9263	STK17A	-0.828799	4.75804	0.00724212	0.0269515
ENSG00000011566	8491	MAP4K3	-0.828564	5.5237	0.000126895	0.00168721
ENSG00000155158	158219	TTC39B	-0.827439	5.74703	0.000635989	0.00498608
ENSG00000166479	54495	TMX3	-0.82743	5.51888	0.000391243	0.00363812
ENSG00000177917	151188	ARL6IP6	-0.827	4.19689	8.63839e-08	1.78914e-05
ENSG00000186104	120227	CYP2R1	-0.826825	4.11234	0.00473608	0.0201094
ENSG00000180008	122809	SOCS4	-0.826733	5.10269	0.000289095	0.00296388
ENSG00000172795	167227	DCP2	-0.826711	5.25881	0.000524831	0.00438513
ENSG00000006576	57157	PHTF2	-0.825502	4.92437	0.0024339	0.0126328
ENSG00000165983	9317	PTER	-0.825471	4.53832	0.000198671	0.00225467
ENSG00000165732	9188	DDX21	-0.825287	6.25944	5.77756e-05	0.00102175
ENSG00000170852	25948	KBTBD2	-0.825153	4.99679	5.1755e-05	0.000946353
ENSG00000058799	54432	YIPF1	-0.823784	5.85651	3.32639e-05	0.000726445
ENSG00000134371	79577	CDC73	-0.82333	5.07064	3.38847e-05	0.000734283
ENSG00000139977	122830	NAA30	-0.821861	4.61682	6.20687e-05	0.00106446
ENSG00000171793	1503	CTPS1	-0.821814	4.61937	0.00151833	0.00907248
ENSG00000139946	57161	PELI2	-0.821784	4.62691	0.000424869	0.00385821
ENSG00000185246	55015	PRPF39	-0.821591	5.27278	0.00183721	0.0103056
ENSG00000180917	55783	CMTR2	-0.821159	5.3025	0.000161637	0.00195599
ENSG00000163249	151195	CCNYL1	-0.820676	4.72624	0.000447478	0.00400277
ENSG00000181830	55343	SLC35C1	-0.819514	6.60891	0.000256673	0.00273159
ENSG00000080345	55183	RIF1	-0.819078	5.43412	0.00013424	0.00173693
ENSG00000067955	865	CBFB	-0.818117	5.361	1.81154e-05	0.000505438
ENSG00000077063	83992	CTTNBP2	-0.817414	3.2833	0.00909562	0.0318155
ENSG00000123552	85015	USP45	-0.817337	3.41088	0.00141651	0.00862397
ENSG00000128791	57045	TWSG1	-0.817327	4.79871	8.56069e-06	0.000320134
ENSG00000083720	5019	OXCT1	-0.816653	5.51568	0.000648267	0.0050463
ENSG00000198643	131177	FAM3D	-0.81664	7.96505	0.00363845	0.0167582
ENSG00000104635	23516	SLC39A14	-0.816031	3.71992	0.000735818	0.00549186
ENSG00000177311	253461	ZBTB38	-0.815745	6.23416	8.49807e-07	9.24487e-05
ENSG00000139505	9107	MTMR6	-0.814948	5.54725	8.45748e-05	0.00130281
ENSG00000187764	10507	SEMA4D	-0.814702	5.89407	0.00539338	0.0219859
ENSG00000165355	254170	FBXO33	-0.814284	4.41975	0.000101167	0.0014547
ENSG00000163635	6314	ATXN7	-0.814075	5.91729	0.00059586	0.00477842
ENSG00000129292	51105	PHF20L1	-0.813512	6.18621	0.000341376	0.00335188
ENSG00000134996	26578	OSTF1	-0.813431	5.69518	3.62383e-06	0.000202221
ENSG00000147872	123	PLIN2	-0.813371	3.81282	0.00718606	0.026829
ENSG00000114933	54891	INO80D	-0.812888	4.73241	9.8946e-05	0.00144107
ENSG00000153064	55024	BANK1	-0.811829	3.33546	0.00592253	0.0234506
ENSG00000198087	23607	CD2AP	-0.811093	6.54243	0.000277208	0.00287474
ENSG00000163728	151613	TTC14	-0.810624	5.33021	0.00169867	0.00977628
ENSG00000129315	904	CCNT1	-0.809892	5.44562	1.84579e-05	0.000508608
ENSG00000136381	3658	IREB2	-0.809772	6.05932	0.000108355	0.00153148
ENSG00000005812	26224	FBXL3	-0.809552	5.52191	0.0001055	0.00150668
ENSG00000129515	58533	SNX6	-0.809412	6.06794	0.000337345	0.00332134
ENSG00000109270	8649	LAMTOR3	-0.809376	5.17458	2.44782e-05	0.000608846
ENSG00000099337	9424	KCNK6	-0.808931	4.33611	0.000142775	0.00181331
ENSG00000184454	400746	NCMAP	-0.808899	3.5828	0.0098191	0.0334129
ENSG00000153922	1105	CHD1	-0.80849	5.83055	0.000553733	0.00455592
ENSG00000117569	58155	PTBP2	-0.808366	3.30707	0.00100886	0.00682076
ENSG00000181104	2149	F2R	-0.808	5.05283	0.0100389	0.033989
ENSG00000168301	200845	KCTD6	-0.807604	3.57035	0.00262968	0.0133049
ENSG00000111880	8732	RNGTT	-0.807345	3.81835	0.000153244	0.00189488
ENSG00000151693	8853	ASAP2	-0.80729	5.92017	0.000177502	0.00208234
ENSG00000168487	649	BMP1	-0.807056	3.85894	0.00700926	0.0263858
ENSG00000143643	79573	TTC13	-0.807044	4.01759	0.000345539	0.00338622
ENSG00000078124	55331	ACER3	-0.80666	4.41751	0.000652422	0.00506603
ENSG00000013375	5238	PGM3	-0.806456	5.65988	0.000167214	0.00199878
ENSG00000081019	54665	RSBN1	-0.806158	4.51495	0.000234207	0.00255563
ENSG00000188725	643155	SMIM15	-0.805636	5.54028	7.65036e-06	0.000297453
ENSG00000198818	113402	SFT2D1	-0.805525	5.09992	1.49681e-06	0.000126671
ENSG00000171843	4300	MLLT3	-0.805003	4.10693	0.000732923	0.00547785
ENSG00000147853	50808	AK3	-0.804463	6.14527	1.99748e-05	0.000533818
ENSG00000100934	10484	SEC23A	-0.803677	4.88658	0.000210947	0.00236164
ENSG00000183735	29110	TBK1	-0.803141	5.1763	0.000360973	0.00347115
ENSG00000214063	7106	TSPAN4	-0.803047	3.35941	0.00632708	0.0245559
ENSG00000205423	255919	CNEP1R1	-0.80301	3.51652	0.000467651	0.00410481
ENSG00000102081	2332	FMR1	-0.80297	5.68288	7.99524e-06	0.000308633
ENSG00000137193	5292	PIM1	-0.802843	5.39156	0.00157525	0.00929103
ENSG00000131378	23180	RFTN1	-0.802679	4.24854	0.00551383	0.022308
ENSG00000169251	51068	NMD3	-0.802119	5.1221	2.25875e-05	0.000575099
ENSG00000164815	5001	ORC5	-0.801621	3.87209	0.000195252	0.00222972
ENSG00000100796	55671	PPP4R3A	-0.801319	6.6063	0.00016431	0.00197723
ENSG00000162976	130814	SLC66A3	-0.800923	4.38447	8.09176e-05	0.00126669
ENSG00000114978	55233	MOB1A	-0.800266	7.30411	8.18691e-05	0.00127972
ENSG00000186377	260293	CYP4X1	-0.799889	5.09423	0.00258317	0.0131602
ENSG00000167513	81620	CDT1	-0.799812	3.29723	0.0130776	0.0411091
ENSG00000171204	55863	TMEM126B	-0.798669	4.46064	0.000452348	0.00402627
ENSG00000130762	27237	ARHGEF16	-0.798533	6.13344	0.000356082	0.00345808
ENSG00000182827	64746	ACBD3	-0.798479	6.14231	2.33989e-06	0.000162584
ENSG00000100528	10175	CNIH1	-0.798375	5.48486	7.94535e-05	0.00125288
ENSG00000111231	51184	GPN3	-0.798161	3.99089	4.30253e-05	0.000848735
ENSG00000163938	26354	GNL3	-0.797099	6.35341	0.000122277	0.00164385
ENSG00000176845	284207	METRNL	-0.79697	4.85199	0.0122911	0.0393506
ENSG00000140743	1039	CDR2	-0.796898	4.3583	0.000529312	0.0044123
ENSG00000197008	7697	ZNF138	-0.79681	3.25343	0.00540359	0.0220086
ENSG00000151233	283464	GXYLT1	-0.796753	4.18064	0.00332394	0.0156532
ENSG00000165240	538	ATP7A	-0.796644	4.79507	0.000152642	0.00189314
ENSG00000031003	51306	FAM13B	-0.79652	5.9767	5.42358e-05	0.000976788
ENSG00000166557	23423	TMED3	-0.796327	6.59203	7.33295e-07	8.46435e-05
ENSG00000198060	54708	MARCHF5	-0.796321	5.60769	4.42979e-05	0.000859619
ENSG00000116667	81563	C1orf21	-0.79627	5.66914	0.000513479	0.0043442
ENSG00000006451	5898	RALA	-0.796112	5.45591	6.2303e-05	0.00106638
ENSG00000129422	57509	MTUS1	-0.795841	7.15562	0.00096338	0.00662132
ENSG00000104331	54928	BPNT2	-0.794803	6.3782	3.90198e-06	0.000203016
ENSG00000027697	3459	IFNGR1	-0.794356	6.82172	0.000140049	0.00178712
ENSG00000055208	23118	TAB2	-0.794345	6.61671	0.00012705	0.00168721
ENSG00000010244	7756	ZNF207	-0.793928	7.17791	1.34737e-05	0.000418766
ENSG00000116406	80267	EDEM3	-0.793796	6.18066	0.000603694	0.00481435
ENSG00000114796	54800	KLHL24	-0.793457	6.17114	0.000900051	0.00631913
ENSG00000078114	10529	NEBL	-0.793103	7.75859	0.000276085	0.0028685
ENSG00000155792	64798	DEPTOR	-0.791847	3.39738	0.0165497	0.0487469
ENSG00000114541	23150	FRMD4B	-0.791809	5.8593	0.00243518	0.0126334
ENSG00000013441	1195	CLK1	-0.791667	7.42793	0.00572789	0.0229016
ENSG00000119414	5537	PPP6C	-0.791425	5.98113	3.43127e-05	0.000740578
ENSG00000108064	7019	TFAM	-0.791403	4.91719	0.000395062	0.00364257
ENSG00000102908	10725	NFAT5	-0.791274	6.68313	0.00343037	0.0160074
ENSG00000147324	9258	MFHAS1	-0.790025	4.30173	2.47619e-05	0.00061173
ENSG00000113742	80315	CPEB4	-0.789643	6.79532	0.00019055	0.00218555
ENSG00000040275	54908	SPDL1	-0.789518	3.73572	0.000306457	0.00309619
ENSG00000159082	8867	SYNJ1	-0.78905	3.98282	0.00110338	0.00723718
ENSG00000157500	26060	APPL1	-0.788937	5.03337	0.000153735	0.00189877
ENSG00000198455	158586	ZXDB	-0.787864	3.79767	0.00247616	0.0127661
ENSG00000104164	26258	BLOC1S6	-0.787341	4.84971	0.00012113	0.00164097
ENSG00000136152	83548	COG3	-0.787137	5.85759	2.88039e-05	0.000671657
ENSG00000185728	253943	YTHDF3	-0.786873	6.18747	1.21684e-05	0.000387732
ENSG00000124795	7913	DEK	-0.786726	5.86216	0.000122305	0.00164385
ENSG00000181690	5324	PLAG1	-0.785685	3.88099	0.000469536	0.0041102
ENSG00000082898	7514	XPO1	-0.785448	7.13779	0.00115778	0.00749354
ENSG00000109133	55161	TMEM33	-0.785339	5.57796	5.30113e-05	0.000964412
ENSG00000100523	80821	DDHD1	-0.784971	4.16679	0.000175912	0.00207057
ENSG00000144034	51002	TPRKB	-0.784436	3.66232	7.45173e-05	0.00120142
ENSG00000163513	7048	TGFBR2	-0.784302	6.05812	2.50997e-05	0.000614371
ENSG00000135837	9857	CEP350	-0.784083	6.18412	6.48237e-06	0.00026592
ENSG00000138696	658	BMPR1B	-0.783609	4.67541	0.00201759	0.0110312
ENSG00000043093	54165	DCUN1D1	-0.783138	4.73872	0.0010788	0.00714555
ENSG00000136153	4008	LMO7	-0.782509	8.47666	0.0017983	0.01014
ENSG00000166123	84706	GPT2	-0.782457	6.95136	0.00088856	0.00627527
ENSG00000100532	10668	CGRRF1	-0.781979	3.48873	0.000636343	0.00498608
ENSG00000132825	5509	PPP1R3D	-0.781517	3.9668	2.19934e-06	0.000156867
ENSG00000105976	4233	MET	-0.781457	7.10769	0.00126529	0.00801599
ENSG00000175073	80124	VCPIP1	-0.781401	5.16897	3.39951e-06	0.000196842
ENSG00000172936	4615	MYD88	-0.780303	6.71958	0.00192138	0.0106556
ENSG00000117475	8548	BLZF1	-0.77959	4.7786	0.000572808	0.00465947
ENSG00000152683	55676	SLC30A6	-0.778571	5.01358	0.000163315	0.00197186
ENSG00000033170	2530	FUT8	-0.777568	4.38431	0.00344865	0.0160718
ENSG00000165233	84270	CARD19	-0.777218	5.60432	0.00160981	0.0094124
ENSG00000171202	84233	TMEM126A	-0.777163	3.46942	5.98031e-05	0.00104134
ENSG00000176142	55254	TMEM39A	-0.77686	5.17045	2.4999e-05	0.000613301
ENSG00000198964	259230	SGMS1	-0.776737	5.45864	3.01139e-06	0.000181188
ENSG00000138698	5910	RAP1GDS1	-0.776675	4.48912	5.95737e-05	0.00103988
ENSG00000254087	4067	LYN	-0.776351	7.81782	0.000604364	0.00481435
ENSG00000115760	57448	BIRC6	-0.776236	7.12151	1.18095e-05	0.000380803
ENSG00000117143	6675	UAP1	-0.776222	7.42495	0.000117478	0.00160767
ENSG00000168246	92181	UBTD2	-0.775875	4.89824	3.03952e-05	0.000689423
ENSG00000186908	23390	ZDHHC17	-0.775502	4.94109	0.000458919	0.00405952
ENSG00000145779	25816	TNFAIP8	-0.775013	5.65998	0.000110805	0.00155185
ENSG00000164040	10424	PGRMC2	-0.774866	5.53877	1.26575e-05	0.000400945
ENSG00000186660	80829	ZFP91	-0.774831	6.24471	0.00011068	0.00155185
ENSG00000196072	282991	BLOC1S2	-0.774478	4.56661	3.92428e-05	0.000801984
ENSG00000135441	2647	BLOC1S1	-0.773395	4.28576	1.99394e-05	0.000533818
ENSG00000120742	27230	SERP1	-0.771893	7.67065	4.64628e-05	0.000875069
ENSG00000151090	7068	THRB	-0.771341	5.03771	0.000558942	0.00457239
ENSG00000104320	4683	NBN	-0.771222	5.94756	0.00122171	0.00780881
ENSG00000108582	1362	CPD	-0.770828	8.45302	0.000356879	0.00346081
ENSG00000154124	90268	OTULIN	-0.770775	4.73319	0.000432618	0.00391208
ENSG00000170340	10678	B3GNT2	-0.770277	6.1024	0.000525974	0.00439127
ENSG00000112305	60682	SMAP1	-0.770269	5.75859	0.000173065	0.00204825
ENSG00000104689	8797	TNFRSF10A	-0.769903	3.97671	0.0130728	0.0411091
ENSG00000111911	135114	HINT3	-0.769213	5.5493	6.80393e-05	0.00113182
ENSG00000158711	2005	ELK4	-0.769141	5.83309	0.000317713	0.00317713
ENSG00000163162	284996	RNF149	-0.769129	5.99665	0.00166684	0.00966191
ENSG00000184182	140739	UBE2F	-0.768744	3.49515	1.80512e-05	0.000505438
ENSG00000133138	54885	TBC1D8B	-0.768679	3.81176	0.00314392	0.0150289
ENSG00000119778	54454	ATAD2B	-0.768305	4.3643	0.000580691	0.00470228
ENSG00000162174	80150	ASRGL1	-0.768216	7.27792	0.00176078	0.0100215
ENSG00000197170	5718	PSMD12	-0.767831	5.86372	0.000165766	0.00198808
ENSG00000005893	3920	LAMP2	-0.766646	6.78922	4.63842e-05	0.000875069
ENSG00000152642	23171	GPD1L	-0.765751	6.8323	0.00495513	0.0207169
ENSG00000178904	147991	DPY19L3	-0.765164	4.95793	0.000970192	0.0066427
ENSG00000102554	688	KLF5	-0.764696	8.94068	0.000986967	0.00671487
ENSG00000156162	286148	DPY19L4	-0.764275	5.16156	0.00023778	0.00258721
ENSG00000056586	54542	RC3H2	-0.764081	6.3044	0.000155075	0.0019044
ENSG00000196636	57001	SDHAF3	-0.763914	3.45408	0.000477559	0.00415789
ENSG00000136888	9550	ATP6V1G1	-0.763761	7.20838	4.09241e-06	0.000208137
ENSG00000172466	7572	ZNF24	-0.762862	6.80541	7.09546e-05	0.00115961
ENSG00000127947	5782	PTPN12	-0.762772	5.23986	0.000245507	0.00264411
ENSG00000159840	7791	ZYX	-0.762727	6.13239	0.00226948	0.0120168
ENSG00000121644	51029	DESI2	-0.762701	5.31484	0.000263596	0.0027751
ENSG00000138767	246175	CNOT6L	-0.76232	5.19427	0.00107069	0.00711688
ENSG00000179387	255520	ELMOD2	-0.762239	5.1653	0.000267447	0.00280468
ENSG00000161921	58191	CXCL16	-0.762029	7.08707	0.00314222	0.0150274
ENSG00000052344	5652	PRSS8	-0.761809	6.65324	0.00582859	0.0231895
ENSG00000164329	167153	TENT2	-0.761376	5.57528	3.64651e-05	0.000764065
ENSG00000129675	9459	ARHGEF6	-0.760984	5.44526	0.000710498	0.00535859
ENSG00000152669	10309	CCNO	-0.760808	6.72935	0.00729626	0.0270783
ENSG00000137040	26953	RANBP6	-0.760736	4.81842	0.000692309	0.0052731
ENSG00000115020	200576	PIKFYVE	-0.760645	5.48108	0.000111155	0.00155234
ENSG00000120798	7181	NR2C1	-0.760055	4.91125	0.000834053	0.00600755
ENSG00000119787	64225	ATL2	-0.759877	5.27053	0.000740433	0.00551484
ENSG00000104290	7976	FZD3	-0.759726	4.96514	5.05128e-05	0.000931547
ENSG00000136122	79866	BORA	-0.759706	3.09177	0.00236872	0.01236
ENSG00000094841	139596	UPRT	-0.759367	4.72218	3.14082e-06	0.000186887
ENSG00000088179	5775	PTPN4	-0.759321	4.49157	5.27754e-05	0.000961745
ENSG00000146963	51631	LUC7L2	-0.759074	4.81928	6.1026e-05	0.00105022
ENSG00000145908	91975	ZNF300	-0.758546	3.52208	0.0102136	0.0343751
ENSG00000115756	3241	HPCAL1	-0.75814	3.91333	0.00157802	0.00929582
ENSG00000169019	54951	COMMD8	-0.758118	4.05226	0.000775757	0.00569912
ENSG00000117308	2582	GALE	-0.757793	6.27466	2.43763e-05	0.000607714
ENSG00000105755	23474	ETHE1	-0.757703	4.60691	0.000614137	0.00485843
ENSG00000007944	29116	MYLIP	-0.757252	5.94108	0.0102906	0.0345802
ENSG00000198315	7745	ZKSCAN8	-0.757161	5.54722	0.00152754	0.00909935
ENSG00000134248	10542	LAMTOR5	-0.757054	6.45306	6.949e-05	0.00114611
ENSG00000147592	51110	LACTB2	-0.756683	4.10457	0.00030162	0.00306168
ENSG00000073417	5151	PDE8A	-0.756024	5.67904	0.00170291	0.00977628
ENSG00000137845	102	ADAM10	-0.755141	6.58282	0.000114315	0.00158451
ENSG00000113851	51185	CRBN	-0.754477	5.0827	0.000145853	0.00184587
ENSG00000119899	26503	SLC17A5	-0.754141	5.01744	4.72689e-05	0.000882298
ENSG00000205133	286144	TRIQK	-0.753504	4.94939	8.33149e-05	0.00129549
ENSG00000103769	8766	RAB11A	-0.753263	7.91773	1.5095e-05	0.000451593
ENSG00000108061	8036	SHOC2	-0.753119	5.88056	0.000116551	0.00160108
ENSG00000133657	79572	ATP13A3	-0.752633	7.40161	0.00291978	0.0143458
ENSG00000083097	23033	DOP1A	-0.752379	6.63953	0.000114299	0.00158451
ENSG00000073969	4905	NSF	-0.751889	5.8875	9.16858e-05	0.00137337
ENSG00000116903	149371	EXOC8	-0.751349	4.48856	4.29504e-06	0.000213236
ENSG00000089639	51291	GMIP	-0.751095	4.86065	0.00366991	0.0168335
ENSG00000143771	29097	CNIH4	-0.750973	4.79502	7.49949e-05	0.00120372
ENSG00000255112	57132	CHMP1B	-0.750841	7.37733	0.000180331	0.00210191
ENSG00000116489	829	CAPZA1	-0.750785	7.04997	0.000154165	0.0019019
ENSG00000122952	11130	ZWINT	-0.750558	3.53247	0.0133647	0.0417818
ENSG00000061987	23041	MON2	-0.750175	6.02636	0.000111924	0.00155842
ENSG00000114395	11068	CYB561D2	-0.749879	4.4815	3.21647e-06	0.000188268
ENSG00000172667	64393	ZMAT3	-0.749557	4.43598	0.000135486	0.00174127
ENSG00000107560	22841	RAB11FIP2	-0.748818	3.76889	0.00059394	0.00477012
ENSG00000198331	219844	HYLS1	-0.747675	3.15444	0.0144947	0.0443487
ENSG00000135018	29979	UBQLN1	-0.747516	7.05896	6.5143e-07	7.92334e-05
ENSG00000088766	54675	CRLS1	-0.747186	5.4038	0.000111058	0.00155234
ENSG00000197448	373156	GSTK1	-0.746711	8.25994	2.22307e-05	0.000567356
ENSG00000170142	7324	UBE2E1	-0.746131	6.10954	3.37547e-05	0.000732939
ENSG00000213281	4893	NRAS	-0.745916	6.06647	4.38685e-05	0.000854366
ENSG00000184007	8073	PTP4A2	-0.745856	7.70808	0.000410191	0.0037534
ENSG00000075539	285527	FRYL	-0.745621	6.18813	0.000103699	0.00148319
ENSG00000175793	2810	SFN	-0.745438	6.18503	0.00796962	0.0289097
ENSG00000165322	94134	ARHGAP12	-0.74517	6.0189	0.000151283	0.00188476
ENSG00000184900	6612	SUMO3	-0.745146	5.97074	3.27255e-05	0.000720765
ENSG00000110330	329	BIRC2	-0.744648	6.13391	9.29008e-05	0.00138771
ENSG00000112406	51696	HECA	-0.74411	5.5865	0.000495004	0.00425641
ENSG00000101247	79133	NDUFAF5	-0.744044	3.42905	0.0014163	0.00862397
ENSG00000104064	2553	GABPB1	-0.743807	3.61644	6.98031e-05	0.00114951
ENSG00000148248	6836	SURF4	-0.743401	7.27045	4.02213e-05	0.000815787
ENSG00000152229	9050	PSTPIP2	-0.742171	3.41505	0.00262066	0.0132884
ENSG00000128923	54629	MINDY2	-0.741731	4.75899	0.000353398	0.00344131
ENSG00000116266	6814	STXBP3	-0.741468	5.58495	0.000151948	0.0018897
ENSG00000198168	258010	SVIP	-0.741028	5.02546	0.00197036	0.0108519
ENSG00000137478	9873	FCHSD2	-0.740938	5.80083	0.000521064	0.00436435
ENSG00000166012	79101	TAF1D	-0.74092	5.2818	0.00113947	0.00739731
ENSG00000119396	51552	RAB14	-0.740544	6.90442	3.59178e-05	0.000758833
ENSG00000136108	26586	CKAP2	-0.740156	4.33742	0.00284459	0.0140791
ENSG00000058729	55781	RIOK2	-0.73984	4.42214	0.000212034	0.00236889
ENSG00000155975	137492	VPS37A	-0.739772	5.00559	8.52841e-05	0.00130656
ENSG00000104660	23484	LEPROTL1	-0.739553	5.397	4.15078e-05	0.00083495
ENSG00000115806	26003	GORASP2	-0.739387	6.48044	2.81906e-05	0.00066291
ENSG00000079337	10411	RAPGEF3	-0.738766	4.19664	0.0117275	0.0379866
ENSG00000115365	10314	LANCL1	-0.738186	5.61009	0.000787717	0.00575948
ENSG00000006007	51573	GDE1	-0.737352	6.80915	0.00795348	0.0288706
ENSG00000196792	29966	STRN3	-0.737341	5.16849	0.000147032	0.00185426
ENSG00000103642	114294	LACTB	-0.737201	3.74463	0.00092267	0.0064235
ENSG00000176105	7525	YES1	-0.737165	5.9631	0.000606847	0.00481839
ENSG00000136141	23143	LRCH1	-0.736856	3.68569	3.65367e-05	0.000764079
ENSG00000174013	200933	FBXO45	-0.736771	4.04617	0.000707131	0.00534067
ENSG00000198689	10479	SLC9A6	-0.73675	4.31731	4.657e-05	0.000875303
ENSG00000119965	80007	C10orf88	-0.736748	3.16124	0.000465941	0.00409313
ENSG00000174839	201627	DENND6A	-0.736529	4.60333	0.000225011	0.00247788
ENSG00000052723	80143	SIKE1	-0.736017	4.95719	0.000211331	0.00236348
ENSG00000107643	5599	MAPK8	-0.735811	5.23081	5.89011e-05	0.00103317
ENSG00000137767	58472	SQOR	-0.73548	5.51731	0.000216935	0.00241363
ENSG00000236287	58486	ZBED5	-0.735381	5.55773	0.000363685	0.00348162
ENSG00000163738	441024	MTHFD2L	-0.735303	3.94264	0.000482736	0.00418942
ENSG00000168994	221749	PXDC1	-0.735016	5.20865	0.00111417	0.00729461
ENSG00000140374	2108	ETFA	-0.734639	5.88496	2.2664e-06	0.000160587
ENSG00000081014	23431	AP4E1	-0.734339	4.50009	0.0002866	0.00294812
ENSG00000164506	134957	STXBP5	-0.734244	4.89549	0.000951788	0.00655419
ENSG00000255529	81488	POLR2M	-0.733484	3.34582	0.00183318	0.0102937
ENSG00000198015	28977	MRPL42	-0.732325	5.50437	8.88931e-05	0.00134463
ENSG00000143924	27436	EML4	-0.731778	7.10876	0.000121566	0.00164385
ENSG00000164414	10559	SLC35A1	-0.731486	3.41878	0.00688164	0.026051
ENSG00000164144	27236	ARFIP1	-0.729783	5.8284	0.000241557	0.00261202
ENSG00000097033	51100	SH3GLB1	-0.729714	6.9884	3.3311e-05	0.000726445
ENSG00000004766	55610	VPS50	-0.729479	4.75791	0.000584805	0.00471786
ENSG00000125772	56261	GPCPD1	-0.72938	6.06725	0.000557767	0.00457019
ENSG00000109606	1665	DHX15	-0.72925	7.00134	1.65546e-05	0.000479335
ENSG00000136986	79139	DERL1	-0.729188	6.20943	2.00754e-05	0.000534916
ENSG00000156413	2528	FUT6	-0.728824	6.00494	0.0052922	0.0217546
ENSG00000124209	57403	RAB22A	-0.728692	5.50021	4.1608e-05	0.00083495
ENSG00000137075	152006	RNF38	-0.728446	5.08784	0.000135146	0.00174127
ENSG00000115841	151393	RMDN2	-0.726589	3.19291	0.00212957	0.0115138
ENSG00000159086	94104	PAXBP1	-0.726474	5.33282	0.00149038	0.00894231
ENSG00000182628	348235	SKA2	-0.726139	4.14254	0.00152982	0.00910281
ENSG00000166266	8065	CUL5	-0.725801	5.46864	0.000118818	0.00162263
ENSG00000175455	64770	CCDC14	-0.725565	5.64968	0.00757052	0.0278085
ENSG00000101213	5753	PTK6	-0.725049	4.31199	0.00544123	0.0220723
ENSG00000121864	51193	ZNF639	-0.724988	4.0349	0.000696742	0.00528817
ENSG00000172766	79612	NAA16	-0.724615	4.12268	0.0033016	0.0155988
ENSG00000008324	51188	SS18L2	-0.724485	3.57785	0.000115592	0.00159198
ENSG00000132953	64328	XPO4	-0.724034	5.31473	0.000376446	0.00354399
ENSG00000113441	4012	LNPEP	-0.72399	5.50844	0.000537971	0.00445688
ENSG00000176273	159371	SLC35G1	-0.723751	3.19805	0.00641229	0.0247795
ENSG00000113658	4090	SMAD5	-0.723667	5.66949	0.000369465	0.00351204
ENSG00000243927	64968	MRPS6	-0.723114	4.68026	0.000142205	0.00181034
ENSG00000182831	29035	HAPSTR1	-0.723016	5.74399	0.00157764	0.00929582
ENSG00000205765	285636	RIMOC1	-0.72295	5.06158	0.000964712	0.00662237
ENSG00000187231	91404	SESTD1	-0.722921	6.17366	0.000745148	0.00554612
ENSG00000072274	7037	TFRC	-0.722389	6.88903	0.0092213	0.0320641
ENSG00000139496	9818	NUP58	-0.72215	5.73	3.28951e-05	0.000723021
ENSG00000163466	10109	ARPC2	-0.721914	7.78164	8.33824e-06	0.000315615
ENSG00000100697	23405	DICER1	-0.721654	6.51016	4.26789e-05	0.000848735
ENSG00000176853	157769	FAM91A1	-0.721604	5.80454	0.000506768	0.00431806
ENSG00000144959	57552	NCEH1	-0.72116	4.53141	0.000202247	0.00228803
ENSG00000154473	9184	BUB3	-0.72092	5.7951	5.39487e-06	0.000242951
ENSG00000091140	1738	DLD	-0.720755	6.47804	9.87352e-05	0.00144107
ENSG00000100614	5494	PPM1A	-0.720712	6.00103	0.000118872	0.00162263
ENSG00000164823	734	OSGIN2	-0.72061	3.92529	0.00124305	0.00792166
ENSG00000129235	84817	TXNDC17	-0.720577	4.9259	1.65211e-05	0.000479335
ENSG00000106355	23658	LSM5	-0.720377	4.40111	0.00112344	0.00732311
ENSG00000177150	125228	FAM210A	-0.719408	3.14006	0.000754438	0.0055941
ENSG00000136146	29079	MED4	-0.719139	5.04921	6.74278e-05	0.00112655
ENSG00000062725	10513	APPBP2	-0.719093	5.74074	0.00066023	0.00510821
ENSG00000100092	23616	SH3BP1	-0.718753	4.7507	0.00216672	0.0116511
ENSG00000127995	64921	CASD1	-0.718382	4.42126	0.00594962	0.0235147
ENSG00000116191	55103	RALGPS2	-0.718053	5.3446	0.000559816	0.00457452
ENSG00000138604	26035	GLCE	-0.717555	5.65318	0.00189079	0.0105185
ENSG00000178691	23512	SUZ12	-0.717172	5.25194	6.83928e-05	0.00113182
ENSG00000120800	27340	UTP20	-0.717137	6.27383	0.00227543	0.0120203
ENSG00000169299	55276	PGM2	-0.715965	4.84439	6.64473e-05	0.00111818
ENSG00000186106	157567	ANKRD46	-0.715133	3.64798	0.000557372	0.00457019
ENSG00000100485	6655	SOS2	-0.714773	5.47221	0.0002574	0.00273392
ENSG00000125775	27111	SDCBP2	-0.71443	6.24282	0.00784522	0.0285468
ENSG00000173542	92597	MOB1B	-0.713543	4.68032	0.00281546	0.01398
ENSG00000137504	58487	CREBZF	-0.712978	6.36029	0.00110028	0.00722559
ENSG00000116754	9295	SRSF11	-0.711698	7.51518	0.000256992	0.00273229
ENSG00000132952	10208	USPL1	-0.711592	4.54585	0.00224654	0.0119301
ENSG00000104341	55353	LAPTM4B	-0.711491	5.79972	0.000440053	0.00395937
ENSG00000124380	11017	SNRNP27	-0.711386	3.85678	8.4904e-05	0.00130281
ENSG00000092439	54822	TRPM7	-0.711322	5.63007	0.00109862	0.0072191
ENSG00000143033	22823	MTF2	-0.710659	4.60452	0.000305253	0.00308693
ENSG00000085377	5550	PREP	-0.710639	5.17257	1.05433e-05	0.00035958
ENSG00000144746	10550	ARL6IP5	-0.710096	6.5312	0.000130271	0.00170582
ENSG00000180776	253832	ZDHHC20	-0.709438	4.80848	0.000229126	0.00251036
ENSG00000115392	55120	FANCL	-0.709351	4.1417	0.00158814	0.00931605
ENSG00000177425	5074	PAWR	-0.709327	5.5828	1.58194e-05	0.000468062
ENSG00000141524	11322	TMC6	-0.708979	6.53204	0.00157237	0.0092893
ENSG00000173041	340252	ZNF680	-0.708647	3.91634	0.00503074	0.0209494
ENSG00000147533	51125	GOLGA7	-0.708086	5.61612	2.39614e-05	0.00060015
ENSG00000085721	54700	RRN3	-0.707875	4.8232	1.8162e-05	0.000505438
ENSG00000120685	80209	PROSER1	-0.706396	5.46062	0.00169448	0.00977628
ENSG00000128699	94101	ORMDL1	-0.705683	5.79648	0.00152541	0.00909167
ENSG00000196247	51427	ZNF107	-0.70557	3.35176	0.0142867	0.043812
ENSG00000144224	23190	UBXN4	-0.705569	7.70621	4.55025e-05	0.000868904
ENSG00000115421	64895	PAPOLG	-0.705408	4.05786	0.00195945	0.0108111
ENSG00000129055	25847	ANAPC13	-0.705362	5.47352	0.000321482	0.00319406
ENSG00000049245	9341	VAMP3	-0.705128	6.41601	9.00451e-07	9.60184e-05
ENSG00000007384	64285	RHBDF1	-0.704711	5.17371	0.00113316	0.00736965
ENSG00000165156	11244	ZHX1	-0.70367	5.26282	0.000668693	0.0051589
ENSG00000108256	57532	NUFIP2	-0.703545	7.33376	0.00113436	0.00737302
ENSG00000235109	64288	ZSCAN31	-0.703039	4.60515	0.0093341	0.0323658
ENSG00000072042	51109	RDH11	-0.702999	5.16803	0.0020632	0.0112254
ENSG00000187097	957	ENTPD5	-0.702922	5.86293	0.00537559	0.0219243
ENSG00000153721	154043	CNKSR3	-0.702904	5.16942	0.00367773	0.0168478
ENSG00000135241	50640	PNPLA8	-0.702838	5.30316	0.000693034	0.00527489
ENSG00000165704	3251	HPRT1	-0.702231	3.59174	0.000176803	0.00207791
ENSG00000177200	80205	CHD9	-0.702129	6.3568	0.000237822	0.00258721
ENSG00000006459	80853	KDM7A	-0.702022	6.62539	0.00259186	0.0131779
ENSG00000163565	3428	IFI16	-0.701942	7.72904	0.000769631	0.00567346
ENSG00000125629	51141	INSIG2	-0.701716	3.85624	0.000691813	0.00527305
ENSG00000168172	84376	HOOK3	-0.701579	5.11169	0.000450295	0.0040132
ENSG00000239305	7844	RNF103	-0.700921	5.97597	0.000156709	0.00190835
ENSG00000112874	83594	NUDT12	-0.700902	5.10176	0.00395497	0.017667
ENSG00000178585	56998	CTNNBIP1	-0.700432	6.04407	5.87447e-05	0.00103211
ENSG00000163251	7855	FZD5	-0.699668	4.88544	0.00464684	0.0198949
ENSG00000138459	55032	SLC35A5	-0.699622	5.30634	0.00181751	0.0102217
ENSG00000086619	56605	ERO1B	-0.699478	4.48906	0.000874918	0.00621152
ENSG00000188641	1806	DPYD	-0.699164	5.98951	0.00020411	0.00230426
ENSG00000164163	6059	ABCE1	-0.699074	5.27822	0.00286438	0.0141316
ENSG00000128989	10776	ARPP19	-0.698821	6.49235	0.000220412	0.00244315
ENSG00000171155	29071	C1GALT1C1	-0.698077	5.31598	0.000486487	0.00420187
ENSG00000188419	1121	CHM	-0.697953	4.32632	0.000659944	0.00510821
ENSG00000175348	56674	TMEM9B	-0.696935	6.11573	2.93433e-05	0.00067963
ENSG00000118200	23271	CAMSAP2	-0.695814	4.83364	0.000365951	0.0034939
ENSG00000143952	51542	VPS54	-0.695636	5.34092	0.00052325	0.00437872
ENSG00000107679	59338	PLEKHA1	-0.695137	4.96983	0.000583996	0.00471487
ENSG00000117000	6018	RLF	-0.69461	4.59882	0.00147825	0.00888933
ENSG00000113580	2908	NR3C1	-0.694493	5.77589	9.22216e-06	0.000334693
ENSG00000133816	9645	MICAL2	-0.69435	5.80941	0.00206487	0.011226
ENSG00000081026	260425	MAGI3	-0.694137	5.84499	0.000292786	0.00298671
ENSG00000211460	7247	TSN	-0.694064	5.72883	0.000150625	0.00187976
ENSG00000138688	84162	BLTP1	-0.693712	6.96498	0.000185927	0.00215315
ENSG00000156504	159090	PABIR2	-0.693334	4.91188	0.000132864	0.0017273
ENSG00000079332	56681	SAR1A	-0.693292	6.29339	7.4657e-05	0.00120188
ENSG00000170759	3799	KIF5B	-0.693227	8.08941	9.1015e-05	0.00136523
ENSG00000107036	57589	RIC1	-0.692772	4.85054	9.81975e-05	0.00143984
ENSG00000074603	54878	DPP8	-0.692199	5.80109	0.000392329	0.00363812
ENSG00000134375	10440	TIMM17A	-0.691968	5.46558	0.000332618	0.00328953
ENSG00000058804	55706	NDC1	-0.691689	4.56237	0.00176818	0.0100353
ENSG00000109920	23360	FNBP4	-0.691651	6.64598	0.00134312	0.00834703
ENSG00000112365	9841	ZBTB24	-0.691147	3.59556	0.00247956	0.0127774
ENSG00000153560	7342	UBP1	-0.691113	6.04863	0.000156585	0.00190835
ENSG00000154813	285381	DPH3	-0.690842	4.76456	0.000289365	0.00296388
ENSG00000197147	23507	LRRC8B	-0.690217	5.88205	0.000315062	0.00315648
ENSG00000198380	2673	GFPT1	-0.689931	7.29437	0.000320485	0.00318759
ENSG00000111530	55832	CAND1	-0.689828	6.97116	0.000122334	0.00164385
ENSG00000155366	389	RHOC	-0.689593	6.4355	9.86928e-06	0.000349645
ENSG00000244045	147007	TMEM199	-0.689451	4.17023	9.73608e-05	0.00143444
ENSG00000096063	6732	SRPK1	-0.68879	6.19644	0.00296271	0.0144617
ENSG00000114354	10342	TFG	-0.688291	6.57786	4.31657e-05	0.000848735
ENSG00000198836	4976	OPA1	-0.687296	6.19472	0.000254621	0.00271243
ENSG00000121879	5290	PIK3CA	-0.687238	4.82646	0.000395711	0.00364257
ENSG00000164088	132160	PPM1M	-0.687224	3.81308	0.000807747	0.00586611
ENSG00000005810	23077	MYCBP2	-0.687218	6.55786	8.40352e-05	0.00130224
ENSG00000011198	51099	ABHD5	-0.686661	5.05523	0.00297748	0.0144971
ENSG00000113387	10923	SUB1	-0.686073	6.04715	0.000248837	0.0026693
ENSG00000105856	26959	HBP1	-0.685555	6.55277	0.000220627	0.00244315
ENSG00000085415	81929	SEH1L	-0.685256	4.22492	9.51232e-05	0.00140918
ENSG00000164338	84135	UTP15	-0.685226	4.02346	0.00231128	0.01213
ENSG00000111490	23329	TBC1D30	-0.685144	4.02007	0.00964175	0.033039
ENSG00000138777	27068	PPA2	-0.684635	5.7671	0.000220238	0.00244315
ENSG00000164332	134510	UBLCP1	-0.684472	5.079	0.00145532	0.00880057
ENSG00000008513	6482	ST3GAL1	-0.684223	5.89644	0.0151699	0.0458417
ENSG00000023516	11215	AKAP11	-0.684131	6.13639	5.35153e-05	0.000970303
ENSG00000141446	114799	ESCO1	-0.684062	4.86832	0.00384769	0.0173298
ENSG00000165629	509	ATP5F1C	-0.683585	6.91992	2.11928e-05	0.000547354
ENSG00000117620	23443	SLC35A3	-0.682948	6.52315	0.00537244	0.0219243
ENSG00000004897	996	CDC27	-0.682707	5.50007	0.00060301	0.00481435
ENSG00000206527	201562	HACD2	-0.682513	4.87914	0.0010626	0.00707978
ENSG00000101574	64863	METTL4	-0.682448	4.01543	0.000462701	0.00407919
ENSG00000084733	10890	RAB10	-0.682289	6.93304	1.36401e-05	0.000420927
ENSG00000165650	118987	PDZD8	-0.681881	5.61192	0.000249936	0.0026731
ENSG00000165813	55088	CCDC186	-0.681574	6.34747	0.00091609	0.00639008
ENSG00000198648	27347	STK39	-0.681363	6.29233	0.002656	0.0134006
ENSG00000247596	11344	TWF2	-0.681321	3.59598	0.000227665	0.00250199
ENSG00000144744	9039	UBA3	-0.681035	6.01771	9.8262e-05	0.00143984
ENSG00000142669	83442	SH3BGRL3	-0.681025	6.19656	0.00114648	0.00743381
ENSG00000064726	53339	BTBD1	-0.680755	6.42446	0.000210317	0.00236047
ENSG00000085832	2060	EPS15	-0.680665	5.90862	4.29937e-05	0.000848735
ENSG00000101166	51012	PRELID3B	-0.680545	5.72225	1.90905e-05	0.000516595
ENSG00000163406	6565	SLC15A2	-0.680157	7.96106	0.0144836	0.0443275
ENSG00000116679	10625	IVNS1ABP	-0.680042	8.00155	0.00965815	0.0330742
ENSG00000164032	3015	H2AZ1	-0.679993	6.63527	0.000989158	0.00672553
ENSG00000069956	5597	MAPK6	-0.679954	6.05113	0.00604615	0.0238198
ENSG00000167861	283987	HID1	-0.679792	5.90129	0.00108666	0.0071808
ENSG00000133111	5994	RFXAP	-0.679564	3.22205	0.0019365	0.0107174
ENSG00000162688	178	AGL	-0.679477	5.67846	0.0101605	0.0342822
ENSG00000176055	153364	MBLAC2	-0.679229	3.08019	0.000784245	0.00573799
ENSG00000185009	26985	AP3M1	-0.678749	5.53643	0.000124692	0.00166205
ENSG00000076513	88455	ANKRD13A	-0.678678	7.25019	0.000286117	0.00294812
ENSG00000174485	10260	DENND4A	-0.678482	5.25854	0.00188669	0.0105011
ENSG00000132388	7326	UBE2G1	-0.678475	5.8521	2.11869e-05	0.000547354
ENSG00000139370	121260	SLC15A4	-0.678258	4.42232	0.00110645	0.00725286
ENSG00000196712	4763	NF1	-0.678249	6.14736	0.000149333	0.00186797
ENSG00000127824	7277	TUBA4A	-0.678151	4.95385	0.000849748	0.00609306
ENSG00000091490	23231	SEL1L3	-0.677588	7.74008	0.00276683	0.0138085
ENSG00000151332	51562	MBIP	-0.677509	3.54089	0.000392846	0.00363812
ENSG00000120539	84930	MASTL	-0.677471	3.73001	0.00170814	0.0097959
ENSG00000107771	54462	CCSER2	-0.677399	5.45043	0.000187725	0.00216932
ENSG00000213516	494115	RBMXL1	-0.677123	4.49302	0.00331189	0.0156352
ENSG00000115339	2591	GALNT3	-0.677078	6.49722	0.000124034	0.00165796
ENSG00000051108	9709	HERPUD1	-0.677042	7.11613	0.000614408	0.00485843
ENSG00000165943	64112	MOAP1	-0.676575	4.92144	7.49861e-05	0.00120372
ENSG00000104375	6788	STK3	-0.67603	4.32345	0.00221308	0.0117994
ENSG00000136717	274	BIN1	-0.675968	4.64506	0.000319987	0.00318759
ENSG00000135480	3855	KRT7	-0.675594	9.28086	0.0125157	0.0398916
ENSG00000140307	2958	GTF2A2	-0.675563	5.0811	0.000154738	0.00190243
ENSG00000198586	9874	TLK1	-0.675305	5.3746	3.61845e-05	0.000759662
ENSG00000109436	23158	TBC1D9	-0.674749	6.02539	0.000122209	0.00164385
ENSG00000106080	55033	FKBP14	-0.674544	3.69656	0.00350149	0.0162828
ENSG00000185658	54014	BRWD1	-0.674319	6.31712	0.000632602	0.00496946
ENSG00000116991	57568	SIPA1L2	-0.674227	5.345	0.00170023	0.00977628
ENSG00000177125	403341	ZBTB34	-0.673859	4.42806	0.00173969	0.00993448
ENSG00000109189	64854	USP46	-0.673218	5.69215	0.000965424	0.00662269
ENSG00000163605	151987	PPP4R2	-0.672567	5.9528	0.00491984	0.0206174
ENSG00000165660	23172	ABRAXAS2	-0.672359	4.47485	0.000172982	0.00204825
ENSG00000104643	66036	MTMR9	-0.672225	3.91229	0.000182456	0.0021198
ENSG00000165678	27069	GHITM	-0.671964	7.65794	1.12476e-05	0.000370106
ENSG00000117528	5825	ABCD3	-0.671202	7.31276	0.00329797	0.0155922
ENSG00000073584	6605	SMARCE1	-0.671116	5.48463	0.000252717	0.00269481
ENSG00000103342	2935	GSPT1	-0.670928	7.19445	0.000295582	0.00300322
ENSG00000107798	3988	LIPA	-0.670896	6.52248	0.00227546	0.0120203
ENSG00000120265	5110	PCMT1	-0.670525	5.56476	1.22891e-05	0.000390423
ENSG00000120526	84955	NUDCD1	-0.670193	3.91635	0.00747786	0.0275652
ENSG00000178996	112574	SNX18	-0.670122	5.31875	0.000196331	0.00223519
ENSG00000099810	4507	MTAP	-0.669834	4.46421	0.000562954	0.00458821
ENSG00000030582	2896	GRN	-0.669714	8.12733	0.0103325	0.0346669
ENSG00000168216	55788	LMBRD1	-0.669648	6.2094	0.000562161	0.00458672
ENSG00000136261	28969	BZW2	-0.669635	5.49026	6.83093e-05	0.00113182
ENSG00000047188	64848	YTHDC2	-0.669557	5.7449	0.00197087	0.0108519
ENSG00000106636	10652	YKT6	-0.669475	6.18773	2.10865e-05	0.000547232
ENSG00000204264	5696	PSMB8	-0.669457	7.70304	0.0050809	0.0211035
ENSG00000136802	56262	LRRC8A	-0.669214	6.61686	0.000859979	0.00614189
ENSG00000008394	4257	MGST1	-0.668792	6.51155	0.00292522	0.014366
ENSG00000134057	891	CCNB1	-0.668719	4.18466	0.00800194	0.0289879
ENSG00000112699	2762	GMDS	-0.668421	5.4181	0.000163656	0.00197377
ENSG00000214367	79441	HAUS3	-0.668229	3.9029	0.00702113	0.0264028
ENSG00000126775	22863	ATG14	-0.668223	5.12452	0.000715342	0.00537255
ENSG00000142892	10026	PIGK	-0.668117	4.95002	0.000387697	0.00362112
ENSG00000103978	25963	TMEM87A	-0.667692	6.79129	3.11118e-05	0.000697241
ENSG00000149100	10480	EIF3M	-0.667523	6.41005	0.000131964	0.00172273
ENSG00000155287	81894	SLC25A28	-0.666698	5.43885	0.00437812	0.0189825
ENSG00000015475	637	BID	-0.666479	5.06054	0.000700107	0.0053025
ENSG00000085491	29957	SLC25A24	-0.666473	5.7145	1.73395e-05	0.000491365
ENSG00000143971	54465	ETAA1	-0.666422	4.05705	0.00638575	0.0247301
ENSG00000152558	114908	TMEM123	-0.665567	8.46942	0.00111021	0.00727312
ENSG00000161048	222236	NAPEPLD	-0.664587	3.49804	0.00612472	0.0240216
ENSG00000071189	23161	SNX13	-0.664414	5.95823	0.00138675	0.00852409
ENSG00000104361	79815	NIPAL2	-0.664057	6.68266	0.00284756	0.0140874
ENSG00000243317	647087	STMP1	-0.663972	5.09149	0.000371685	0.0035244
ENSG00000166575	65084	TMEM135	-0.663884	4.63823	0.00503409	0.0209494
ENSG00000021574	6683	SPAST	-0.663441	4.51667	0.000949151	0.00654639
ENSG00000124226	55905	RNF114	-0.663376	6.68985	0.00268094	0.0134987
ENSG00000152527	130271	PLEKHH2	-0.663246	5.10796	0.0107462	0.0356661
ENSG00000124151	8202	NCOA3	-0.663159	6.94655	8.49002e-05	0.00130281
ENSG00000173166	65059	RAPH1	-0.662879	5.50344	0.00242035	0.0125807
ENSG00000071537	6400	SEL1L	-0.662753	6.68576	0.000292847	0.00298671
ENSG00000144357	130507	UBR3	-0.662694	5.85496	0.00017521	0.00206683
ENSG00000114209	11235	PDCD10	-0.662442	5.24843	0.000417385	0.00380307
ENSG00000159128	3460	IFNGR2	-0.662407	5.66173	0.0054126	0.022018
ENSG00000114120	55186	SLC25A36	-0.662251	6.83501	0.0142709	0.0438033
ENSG00000144566	5868	RAB5A	-0.662247	6.20211	3.83866e-05	0.00079247
ENSG00000168268	64943	NT5DC2	-0.662091	4.8848	0.00253792	0.0129973
ENSG00000129083	1315	COPB1	-0.661627	7.33372	0.00018887	0.00217629
ENSG00000107738	64115	VSIR	-0.661547	6.51991	0.00921588	0.0320591
ENSG00000162458	54751	FBLIM1	-0.661379	4.49966	0.00284925	0.0140881
ENSG00000131507	80762	NDFIP1	-0.661304	7.3941	0.000147206	0.00185428
ENSG00000197142	51703	ACSL5	-0.661261	6.73251	0.00784225	0.0285468
ENSG00000198478	83699	SH3BGRL2	-0.660913	6.49179	0.000169889	0.00201954
ENSG00000164073	256471	MFSD8	-0.660789	4.48439	0.00305236	0.0147615
ENSG00000176731	401466	RBIS	-0.660363	4.84585	0.00117612	0.00757582
ENSG00000124198	10564	ARFGEF2	-0.660026	6.78753	3.33207e-05	0.000726445
ENSG00000109618	51091	SEPSECS	-0.659426	4.57919	0.00227571	0.0120203
ENSG00000092531	8773	SNAP23	-0.659381	6.12212	0.000294714	0.00299723
ENSG00000093144	55862	ECHDC1	-0.659048	5.91997	9.34516e-05	0.00139395
ENSG00000180964	90843	TCEAL8	-0.65855	4.9754	0.00015266	0.00189314
ENSG00000167034	4824	NKX3-1	-0.657387	4.84169	0.0154609	0.0464474
ENSG00000139350	121441	NEDD1	-0.657158	4.50352	0.000892821	0.00629222
ENSG00000166136	4714	NDUFB8	-0.657038	3.85551	0.000127751	0.00169235
ENSG00000177853	9849	ZNF518A	-0.656671	5.02813	0.00331286	0.0156352
ENSG00000040341	27067	STAU2	-0.655477	5.35021	0.000370622	0.00351993
ENSG00000135316	10492	SYNCRIP	-0.655388	6.87194	0.000981659	0.00669567
ENSG00000119801	51646	YPEL5	-0.655288	7.43609	0.00204899	0.0111679
ENSG00000178163	85460	ZNF518B	-0.65487	4.67729	0.0011412	0.00740408
ENSG00000111897	57515	SERINC1	-0.654841	6.99728	0.0027542	0.0137646
ENSG00000189308	132660	LIN54	-0.654551	4.26085	0.000337377	0.00332134
ENSG00000100567	5684	PSMA3	-0.654021	6.42277	0.000703772	0.00531904
ENSG00000137575	6386	SDCBP	-0.653608	7.33878	0.00755867	0.0278029
ENSG00000176390	51379	CRLF3	-0.653491	3.9506	0.0112694	0.0369133
ENSG00000163235	7039	TGFA	-0.653368	5.39408	1.59014e-05	0.000469201
ENSG00000121892	23244	PDS5A	-0.653019	6.69055	0.000171039	0.00203098
ENSG00000139163	55500	ETNK1	-0.653006	5.90036	0.000183366	0.00212807
ENSG00000143578	148327	CREB3L4	-0.652735	5.02381	0.00586845	0.0232914
ENSG00000183354	158358	KIAA2026	-0.652674	5.35392	0.000461182	0.00407125
ENSG00000115504	23301	EHBP1	-0.652523	5.2656	0.000450507	0.0040132
ENSG00000108433	9570	GOSR2	-0.652426	4.28364	7.08945e-05	0.00115961
ENSG00000163947	50650	ARHGEF3	-0.652151	5.53976	0.000109246	0.00153601
ENSG00000113638	23548	TTC33	-0.652136	3.81238	0.00374089	0.0170165
ENSG00000186088	54103	GSAP	-0.651773	5.09822	0.00637357	0.0246918
ENSG00000171617	8507	ENC1	-0.651579	6.64078	0.000303399	0.00307395
ENSG00000001629	54467	ANKIB1	-0.651344	6.14809	2.70279e-05	0.000645932
ENSG00000156110	132	ADK	-0.650876	4.1201	0.00065817	0.00510476
ENSG00000188811	387921	NHLRC3	-0.65072	5.61513	0.000383634	0.00359594
ENSG00000108829	55379	LRRC59	-0.650091	7.01832	0.000100047	0.00144787
ENSG00000151292	1456	CSNK1G3	-0.649804	4.82395	0.000393201	0.00363812
ENSG00000119912	3416	IDE	-0.649644	6.30868	0.000707939	0.00534303
ENSG00000242372	3692	EIF6	-0.64948	6.20485	5.66712e-06	0.000248544
ENSG00000165105	158158	RASEF	-0.649282	6.09063	0.00194615	0.0107653
ENSG00000161547	6427	SRSF2	-0.648636	7.68819	0.000505297	0.00431224
ENSG00000026103	355	FAS	-0.648237	4.89439	0.0170613	0.0498779
ENSG00000112249	10973	ASCC3	-0.647621	6.06001	0.00129192	0.00813266
ENSG00000197798	79607	FAM118B	-0.647516	4.23533	7.14211e-05	0.00116546
ENSG00000106144	835	CASP2	-0.647479	5.60956	0.00465898	0.0199274
ENSG00000170855	51499	TRIAP1	-0.646554	3.996	0.000448821	0.0040057
ENSG00000174840	201626	PDE12	-0.646479	5.04789	0.000190366	0.00218555
ENSG00000115084	80255	SLC35F5	-0.646169	5.94271	0.00158801	0.00931605
ENSG00000050130	51528	JKAMP	-0.646152	6.06202	0.00328077	0.0155314
ENSG00000104047	56986	DTWD1	-0.644521	3.82444	0.00950927	0.0327832
ENSG00000102024	5358	PLS3	-0.644433	5.88869	0.00492465	0.0206295
ENSG00000105879	79872	CBLL1	-0.644248	4.49034	9.95373e-05	0.00144672
ENSG00000143079	55917	CTTNBP2NL	-0.644141	5.73861	0.0062113	0.0242551
ENSG00000136026	10970	CKAP4	-0.644097	6.56379	0.00252525	0.0129447
ENSG00000000419	8813	DPM1	-0.643596	5.10994	0.000327403	0.00324391
ENSG00000118564	26234	FBXL5	-0.643577	6.89446	0.00138101	0.00850882
ENSG00000144426	65065	NBEAL1	-0.642722	5.37897	0.00722876	0.0269239
ENSG00000102595	55757	UGGT2	-0.642317	4.19302	0.0073647	0.0272851
ENSG00000101557	9097	USP14	-0.642226	5.67054	0.000415738	0.00379449
ENSG00000115594	3554	IL1R1	-0.641971	6.2558	0.00301683	0.0146291
ENSG00000169764	7360	UGP2	-0.641858	7.18787	0.000421269	0.00383523
ENSG00000172939	9943	OXSR1	-0.641574	5.57587	0.000923965	0.00642836
ENSG00000135249	60561	RINT1	-0.641304	4.70942	0.000146602	0.001851
ENSG00000112144	22858	CILK1	-0.640637	6.45099	0.000941544	0.00650862
ENSG00000113595	373	TRIM23	-0.640424	3.96858	0.000225606	0.0024819
ENSG00000115524	23451	SF3B1	-0.639943	8.82535	0.000320534	0.00318759
ENSG00000127125	79717	PPCS	-0.639771	5.69537	3.47842e-05	0.000746267
ENSG00000112419	9749	PHACTR2	-0.639613	5.2691	0.00139155	0.00854071
ENSG00000066468	2263	FGFR2	-0.638521	6.55411	0.00255825	0.0130456
ENSG00000117155	117178	SSX2IP	-0.637939	4.72204	0.00270828	0.0136
ENSG00000198825	22876	INPP5F	-0.637686	4.52338	0.000147765	0.00185915
ENSG00000037749	4238	MFAP3	-0.637668	5.21192	0.00389243	0.0174673
ENSG00000196227	63939	FAM217B	-0.637371	4.30268	0.000111273	0.00155234
ENSG00000132950	9205	ZMYM5	-0.636935	3.77073	0.00216144	0.0116464
ENSG00000132823	51526	OSER1	-0.636847	5.50813	0.000821334	0.00594474
ENSG00000051128	9454	HOMER3	-0.636649	3.20229	0.00819895	0.0295031
ENSG00000156026	90550	MCU	-0.636062	6.50534	0.000714395	0.00537194
ENSG00000117519	1266	CNN3	-0.635671	7.30472	0.0011819	0.00760854
ENSG00000138760	950	SCARB2	-0.635581	7.38808	4.3808e-05	0.000854366
ENSG00000115761	79954	NOL10	-0.635419	4.39329	0.000883404	0.00624705
ENSG00000018510	8540	AGPS	-0.635384	5.36541	0.000498685	0.00427471
ENSG00000119446	92400	RBM18	-0.635062	5.08679	0.000183847	0.00213136
ENSG00000114744	51122	COMMD2	-0.635036	4.73621	0.000881704	0.00623913
ENSG00000161813	113251	LARP4	-0.634881	6.14012	0.00138298	0.00851126
ENSG00000137876	51187	RSL24D1	-0.634484	5.48275	0.000617027	0.00487555
ENSG00000115364	9801	MRPL19	-0.634453	4.96339	0.000239705	0.00260244
ENSG00000138594	29766	TMOD3	-0.634413	6.79971	0.000332989	0.00329018
ENSG00000138594	112268148	LOC112268148	-0.634413	6.79971	0.000332989	0.00329018
ENSG00000204370	6392	SDHD	-0.634323	4.9851	0.0170152	0.0497973
ENSG00000161970	6154	RPL26	-0.633905	6.15687	4.60248e-05	0.000872689
ENSG00000148688	10556	RPP30	-0.633495	4.60345	0.000917992	0.00639921
ENSG00000140525	55215	FANCI	-0.633177	4.63914	0.00552981	0.0223507
ENSG00000066855	9650	MTFR1	-0.633171	4.45609	0.000155456	0.00190474
ENSG00000133794	406	BMAL1	-0.633131	4.32497	0.0033199	0.0156502
ENSG00000249242	441027	TMEM150C	-0.632317	5.20802	0.00617339	0.0241597
ENSG00000145391	80854	SETD7	-0.632145	6.40133	3.0312e-05	0.000689423
ENSG00000145391	105377622	LOC105377622	-0.632145	6.40133	3.0312e-05	0.000689423
ENSG00000108854	64750	SMURF2	-0.631998	5.44408	0.00126079	0.00799217
ENSG00000009844	51534	VTA1	-0.631852	5.55493	0.000179291	0.00209205
ENSG00000108774	5878	RAB5C	-0.63179	5.56644	3.99366e-07	5.94512e-05
ENSG00000179630	144811	LACC1	-0.631298	4.13199	0.0107339	0.0356582
ENSG00000086598	10959	TMED2	-0.6312	7.67632	5.08774e-05	0.000936665
ENSG00000032219	5926	ARID4A	-0.630761	4.61995	0.00107117	0.00711688
ENSG00000095787	51322	WAC	-0.630678	6.95754	3.07785e-05	0.000692175
ENSG00000139192	55080	TAPBPL	-0.630588	6.3303	0.003798	0.0171659
ENSG00000155313	29761	USP25	-0.630581	5.76353	0.000949439	0.00654639
ENSG00000068878	23198	PSME4	-0.630144	7.12704	2.17113e-05	0.000559404
ENSG00000139517	222484	LNX2	-0.630096	5.27512	0.000733853	0.00548099
ENSG00000169499	59339	PLEKHA2	-0.630027	5.86911	0.00146493	0.00884308
ENSG00000122435	54482	TRMT13	-0.62978	3.96256	0.00429252	0.0187547
ENSG00000149311	472	ATM	-0.629769	5.51658	0.0021709	0.0116553
ENSG00000160783	11243	PMF1	-0.629713	3.92844	0.00102749	0.0069172
ENSG00000204764	64901	RANBP17	-0.629587	3.77203	0.00957665	0.0329312
ENSG00000146263	253714	MMS22L	-0.629318	3.52901	0.00612825	0.0240267
ENSG00000178567	9852	EPM2AIP1	-0.628526	5.02032	0.00456524	0.0196435
ENSG00000111237	51699	VPS29	-0.628473	5.96356	8.03088e-05	0.00125899
ENSG00000010017	10048	RANBP9	-0.628031	6.22273	0.000676392	0.00518982
ENSG00000181026	64782	AEN	-0.627767	3.80686	0.00246509	0.0127273
ENSG00000157110	11030	RBPMS	-0.62776	5.44929	0.00540713	0.0220086
ENSG00000123124	11059	WWP1	-0.627224	5.79375	0.000423149	0.00384653
ENSG00000198961	9867	PJA2	-0.627146	6.70935	0.000247271	0.00265515
ENSG00000114520	8723	SNX4	-0.627047	5.56093	2.78464e-05	0.000656248
ENSG00000115091	10096	ACTR3	-0.627017	7.41676	0.00245638	0.0127005
ENSG00000100852	394	ARHGAP5	-0.626772	6.65338	0.00801342	0.0290099
ENSG00000108784	4669	NAGLU	-0.626624	5.40939	5.11467e-05	0.000940017
ENSG00000014824	10463	SLC30A9	-0.626469	6.18842	0.000384219	0.00359829
ENSG00000077092	5915	RARB	-0.626015	5.35619	0.00277435	0.0138332
ENSG00000197343	79027	ZNF655	-0.625997	6.22221	0.000532504	0.00443204
ENSG00000147669	5440	POLR2K	-0.625908	5.31487	0.000379953	0.00357076
ENSG00000087470	10059	DNM1L	-0.625607	5.73894	0.000751121	0.00557517
ENSG00000162607	7398	USP1	-0.625249	5.29103	0.00326449	0.0154815
ENSG00000166126	81693	AMN	-0.624964	4.57401	0.013463	0.0419904
ENSG00000163602	23429	RYBP	-0.623897	5.54293	0.00282476	0.0140068
ENSG00000171988	221037	JMJD1C	-0.623751	6.30317	0.00146304	0.00884229
ENSG00000204435	1460	CSNK2B	-0.623671	4.39616	9.90149e-05	0.00144107
ENSG00000133393	123811	CEP20	-0.623627	4.8518	0.000779165	0.00571602
ENSG00000139508	283537	SLC46A3	-0.622431	5.61771	0.0145916	0.0445693
ENSG00000139173	84216	TMEM117	-0.622013	3.11773	0.00247577	0.0127661
ENSG00000067248	54505	DHX29	-0.621936	5.42142	0.000795509	0.00580016
ENSG00000139722	79720	VPS37B	-0.621883	6.93863	0.000393163	0.00363812
ENSG00000143751	163859	SDE2	-0.62127	5.0048	0.0018646	0.010405
ENSG00000135535	8763	CD164	-0.620969	8.62045	0.00666074	0.0254383
ENSG00000167005	11051	NUDT21	-0.620945	6.20669	0.000246225	0.00264655
ENSG00000017260	27032	ATP2C1	-0.620261	7.34134	0.000973978	0.00666439
ENSG00000070540	55062	WIPI1	-0.619461	5.2856	0.00106489	0.00708832
ENSG00000113163	10087	CERT1	-0.619348	6.40624	0.000640164	0.00500584
ENSG00000102317	5935	RBM3	-0.619263	8.04953	5.43693e-05	0.000977559
ENSG00000143774	2987	GUK1	-0.618763	7.31606	6.89456e-05	0.00113887
ENSG00000152061	9910	RABGAP1L	-0.618602	6.84162	0.00315503	0.0150753
ENSG00000116514	127544	RNF19B	-0.618274	6.34981	0.00229618	0.0120869
ENSG00000128595	813	CALU	-0.618223	6.53061	0.00109571	0.00720881
ENSG00000116574	58480	RHOU	-0.618044	5.8789	0.00689049	0.0260754
ENSG00000124532	57380	MRS2	-0.617948	5.09802	0.000227955	0.00250262
ENSG00000149308	4863	NPAT	-0.617843	4.43039	0.00247348	0.0127644
ENSG00000184602	8303	SNN	-0.617832	5.32298	0.00377197	0.0170977
ENSG00000174442	55055	ZWILCH	-0.617805	3.72036	0.0025105	0.0128876
ENSG00000066027	5525	PPP2R5A	-0.617546	5.85658	0.000179152	0.00209205
ENSG00000142166	3454	IFNAR1	-0.617508	6.45539	0.000311565	0.0031331
ENSG00000152409	133746	JMY	-0.617042	5.40234	0.000641694	0.00501164
ENSG00000166889	219988	PATL1	-0.616156	5.79369	0.00388262	0.0174451
ENSG00000165487	221154	MICU2	-0.615447	5.34278	0.00186745	0.0104156
ENSG00000110344	9354	UBE4A	-0.615407	6.69422	0.000697757	0.00528841
ENSG00000198887	23137	SMC5	-0.615386	6.10078	0.000759537	0.00562601
ENSG00000170571	133418	EMB	-0.615174	6.46296	0.0139786	0.0432031
ENSG00000196504	55660	PRPF40A	-0.61466	6.78281	0.00149142	0.00894352
ENSG00000152492	152137	CCDC50	-0.614358	5.71862	7.9931e-05	0.00125673
ENSG00000102218	6102	RP2	-0.614246	4.46088	0.000996406	0.00674924
ENSG00000121481	6045	RNF2	-0.613983	4.1315	0.00137046	0.00845364
ENSG00000138757	9908	G3BP2	-0.613852	7.32631	0.000366547	0.0034939
ENSG00000104413	54845	ESRP1	-0.613788	6.93119	0.000135332	0.00174127
ENSG00000157538	10311	VPS26C	-0.613778	5.50806	0.00013076	0.00170908
ENSG00000034510	9168	TMSB10	-0.613675	8.91272	0.0109898	0.0362185
ENSG00000165724	116225	ZMYND19	-0.613656	4.27161	0.000964762	0.00662237
ENSG00000256043	1519	CTSO	-0.613185	5.5503	0.0047571	0.020147
ENSG00000140157	81614	NIPA2	-0.612715	5.84202	9.20075e-05	0.00137628
ENSG00000110719	10312	TCIRG1	-0.612373	7.38205	0.00486565	0.0204541
ENSG00000174106	23592	LEMD3	-0.61233	5.13528	0.000423225	0.00384653
ENSG00000166275	119032	BORCS7	-0.612311	4.56851	0.0120762	0.038859
ENSG00000162302	8986	RPS6KA4	-0.611826	5.25923	0.00220738	0.0117807
ENSG00000111615	11103	KRR1	-0.611805	5.29516	0.00316614	0.0151104
ENSG00000145817	81555	YIPF5	-0.611699	5.92734	0.000165392	0.00198802
ENSG00000101972	10735	STAG2	-0.611245	6.62479	0.000588488	0.00473339
ENSG00000163950	7884	SLBP	-0.61118	5.19406	4.12737e-05	0.000833992
ENSG00000132541	10247	RIDA	-0.610799	3.37648	0.00433384	0.018874
ENSG00000154639	1525	CXADR	-0.610663	5.9385	0.00136786	0.00845199
ENSG00000077044	8527	DGKD	-0.61053	5.81727	0.00648713	0.024944
ENSG00000123992	23549	DNPEP	-0.610219	6.24816	0.000148682	0.00186235
ENSG00000100242	25777	SUN2	-0.610162	6.77646	0.00159121	0.009329
ENSG00000162923	80232	WDR26	-0.61	7.19681	0.000124232	0.00165796
ENSG00000118246	22868	FASTKD2	-0.609528	4.87	0.0036603	0.0168037
ENSG00000163655	8833	GMPS	-0.609152	5.09076	0.000127922	0.00169253
ENSG00000169689	201254	CENPX	-0.609102	4.86677	2.08693e-05	0.000544219
ENSG00000253352	55000	TUG1	-0.608452	7.3424	0.000535525	0.00444688
ENSG00000180957	23760	PITPNB	-0.608044	5.84359	0.000696548	0.00528817
ENSG00000114857	4820	NKTR	-0.608036	6.96046	0.00844581	0.0301097
ENSG00000074855	57719	ANO8	-0.608027	4.64329	0.007517	0.027678
ENSG00000146242	7162	TPBG	-0.607437	5.97036	0.00112156	0.00732311
ENSG00000107864	22849	CPEB3	-0.607123	4.19197	0.000575634	0.00467264
ENSG00000107669	11101	ATE1	-0.606965	5.20149	0.000116909	0.00160396
ENSG00000158470	9334	B4GALT5	-0.606421	8.75215	0.00833755	0.0298621
ENSG00000081923	5205	ATP8B1	-0.606265	7.28202	2.65419e-05	0.000638734
ENSG00000185127	387263	C6orf120	-0.606245	4.74363	0.000129714	0.00170444
ENSG00000174032	253512	SLC25A30	-0.606008	4.88875	0.00533146	0.0218659
ENSG00000104765	665	BNIP3L	-0.605451	6.23592	0.000887968	0.00627521
ENSG00000138069	5861	RAB1A	-0.605283	7.06865	4.54166e-05	0.000868804
ENSG00000119812	25940	FAM98A	-0.60511	5.32721	0.00109226	0.00719626
ENSG00000119812	105374454	RASGRP3-AS1	-0.60511	5.32721	0.00109226	0.00719626
ENSG00000066455	9950	GOLGA5	-0.605089	6.22727	5.71312e-05	0.00101368
ENSG00000206337	10866	HCP5	-0.605038	7.17322	0.0115856	0.0376309
ENSG00000139132	121512	FGD4	-0.604603	4.78606	0.00605818	0.0238387
ENSG00000138032	5495	PPM1B	-0.60442	5.89193	2.02985e-05	0.000537136
ENSG00000154727	2551	GABPA	-0.604039	4.16248	0.00139823	0.00855623
ENSG00000155329	54819	ZCCHC10	-0.60403	3.97607	0.000388002	0.00362112
ENSG00000136868	1317	SLC31A1	-0.603826	8.47057	0.00892916	0.031335
ENSG00000174173	54931	TRMT10C	-0.603765	4.21854	0.0022514	0.0119329
ENSG00000204592	3133	HLA-E	-0.603657	10.2977	0.0115889	0.0376309
ENSG00000116005	51449	PCYOX1	-0.603442	5.9905	0.00557145	0.0224736
ENSG00000011295	54902	TTC19	-0.603378	5.74703	0.000994241	0.00674796
ENSG00000139323	282809	POC1B	-0.603299	5.35575	0.00370713	0.0169505
ENSG00000082512	7188	TRAF5	-0.603188	4.19675	0.00547217	0.0221811
ENSG00000081154	57092	PCNP	-0.602876	5.82027	0.00029437	0.00299656
ENSG00000082213	55322	C5orf22	-0.602667	4.94037	0.00113705	0.00738603
ENSG00000138071	10097	ACTR2	-0.602203	7.63344	0.0010058	0.00680432
ENSG00000129003	54832	VPS13C	-0.602036	7.40433	2.5651e-05	0.000625026
ENSG00000162972	79568	MAIP1	-0.601861	3.75906	7.59693e-05	0.00121738
ENSG00000114439	56987	BBX	-0.601767	6.26077	0.000395433	0.00364257
ENSG00000253710	440138	ALG11	-0.600065	3.2881	0.000713544	0.00537028
ENSG00000143155	261726	TIPRL	-0.599946	4.86846	0.00170188	0.00977628
ENSG00000111670	79158	GNPTAB	-0.59978	6.32947	0.0010549	0.00704796
ENSG00000165806	840	CASP7	-0.599611	7.35399	0.000695134	0.00528341
ENSG00000166900	6809	STX3	-0.599327	5.88887	0.000317094	0.00317388
ENSG00000134152	79768	KATNBL1	-0.599138	4.39422	0.0123014	0.0393719
ENSG00000011258	54799	MBTD1	-0.598993	4.68142	0.00132272	0.00827276
ENSG00000011405	5286	PIK3C2A	-0.598865	5.84548	0.00161728	0.00945095
ENSG00000159479	112950	MED8	-0.59873	5.11299	0.000341413	0.00335188
ENSG00000138709	55132	LARP1B	-0.598698	4.60649	0.00177862	0.0100714
ENSG00000138750	53371	NUP54	-0.598479	5.06679	0.00025169	0.00268912
ENSG00000138138	84896	ATAD1	-0.598333	5.95557	0.000731188	0.00546868
ENSG00000140577	64784	CRTC3	-0.598205	4.8388	0.00157467	0.00929103
ENSG00000080200	131544	CRYBG3	-0.59811	4.90485	0.000151376	0.00188476
ENSG00000137055	9373	PLAA	-0.59809	4.94414	0.00020502	0.0023097
ENSG00000175538	10008	KCNE3	-0.597873	7.79661	0.00813278	0.0293426
ENSG00000103326	6650	CAPN15	-0.597524	5.66031	0.000907554	0.00634699
ENSG00000073921	8301	PICALM	-0.597468	7.11566	0.00164609	0.00956221
ENSG00000121210	23240	TMEM131L	-0.597214	4.50651	0.0058394	0.0231982
ENSG00000064313	6873	TAF2	-0.597136	5.58949	0.000208306	0.00234182
ENSG00000138814	5530	PPP3CA	-0.596723	5.18041	0.00179206	0.0101209
ENSG00000150347	84159	ARID5B	-0.596283	5.58997	0.00370959	0.0169505
ENSG00000145782	9140	ATG12	-0.596217	5.29765	0.000597258	0.00478251
ENSG00000142252	79760	GEMIN7	-0.595949	3.41522	0.000586744	0.00472984
ENSG00000112308	81688	C6orf62	-0.595778	7.52135	0.000676865	0.00518982
ENSG00000156671	142891	SAMD8	-0.595323	5.67128	0.00136007	0.00841354
ENSG00000038002	175	AGA	-0.595088	4.65187	0.00491404	0.0206091
ENSG00000102580	5611	DNAJC3	-0.594663	6.8528	0.00132646	0.00828586
ENSG00000134001	1965	EIF2S1	-0.594529	5.67683	0.000111998	0.00155842
ENSG00000109670	55294	FBXW7	-0.594401	4.53791	0.000100904	0.0014547
ENSG00000115561	51652	CHMP3	-0.594124	6.18454	0.000372924	0.00352477
ENSG00000137692	84259	DCUN1D5	-0.594123	4.08794	0.000372887	0.00352477
ENSG00000108639	9144	SYNGR2	-0.593829	7.49031	0.000879736	0.00623088
ENSG00000088451	23483	TGDS	-0.593384	3.71916	0.00747868	0.0275652
ENSG00000108091	8030	CCDC6	-0.592986	6.27886	0.00249655	0.0128343
ENSG00000174780	6731	SRP72	-0.592732	5.9423	0.0021265	0.011503
ENSG00000166311	6609	SMPD1	-0.592304	4.71575	0.00260935	0.0132497
ENSG00000150457	26524	LATS2	-0.591932	3.76169	0.000137471	0.00176433
ENSG00000149761	84304	NUDT22	-0.591841	4.88228	0.00139261	0.00854071
ENSG00000132842	8546	AP3B1	-0.591808	6.17923	0.000457003	0.0040534
ENSG00000120370	92344	GORAB	-0.591692	3.73954	0.00377741	0.017108
ENSG00000241468	9551	ATP5MF	-0.591686	5.39682	8.26981e-05	0.00128894
ENSG00000167985	54949	SDHAF2	-0.591578	3.17656	0.000714763	0.00537194
ENSG00000173889	80012	PHC3	-0.591232	6.0215	7.07648e-05	0.00115961
ENSG00000166822	124491	TMEM170A	-0.59122	4.95351	0.00266211	0.0134164
ENSG00000158467	23382	AHCYL2	-0.59121	7.45565	0.00118859	0.00764702
ENSG00000187257	222194	RSBN1L	-0.590588	5.61578	0.00129243	0.00813266
ENSG00000103018	80777	CYB5B	-0.590578	5.8355	4.44949e-05	0.000861889
ENSG00000014123	23376	UFL1	-0.590212	6.06146	0.00147487	0.00887889
ENSG00000138081	80204	FBXO11	-0.589994	5.86928	0.0026845	0.0135
ENSG00000076928	9138	ARHGEF1	-0.589827	6.38878	0.01603	0.0476257
ENSG00000123268	466	ATF1	-0.589764	4.35312	2.36324e-05	0.000596069
ENSG00000095261	5711	PSMD5	-0.589559	5.24178	0.000249128	0.00266976
ENSG00000152217	26040	SETBP1	-0.589079	4.23463	0.00214665	0.0115838
ENSG00000036257	8452	CUL3	-0.58907	6.49439	0.000286279	0.00294812
ENSG00000171150	9655	SOCS5	-0.588802	4.05076	0.00548636	0.0222249
ENSG00000133193	84923	FAM104A	-0.588249	5.11957	7.05489e-05	0.00115961
ENSG00000172339	199857	ALG14	-0.587998	3.42245	0.00201061	0.0110144
ENSG00000085831	22996	TTC39A	-0.587969	5.60234	0.000469654	0.0041102
ENSG00000189079	196528	ARID2	-0.58776	5.77898	0.00839222	0.0299981
ENSG00000115758	4953	ODC1	-0.58764	6.00906	0.0141762	0.0435973
ENSG00000153006	285672	SREK1IP1	-0.587072	4.58225	0.00465161	0.0199038
ENSG00000180773	120103	SLC36A4	-0.586906	3.94289	0.00372407	0.0169712
ENSG00000116918	7257	TSNAX	-0.586894	4.78515	0.000307895	0.00310781
ENSG00000008952	7095	SEC62	-0.586516	6.88378	0.000195437	0.00222972
ENSG00000135185	79161	TMEM243	-0.586421	4.43913	0.00108773	0.00718265
ENSG00000144677	10217	CTDSPL	-0.586097	6.08232	0.00429045	0.0187533
ENSG00000113282	9685	CLINT1	-0.585852	8.55864	0.00079421	0.00579515
ENSG00000070269	54916	TMEM260	-0.585812	4.91572	0.00244068	0.0126436
ENSG00000065060	54887	BLTP3A	-0.585536	5.4053	0.000493544	0.00424898
ENSG00000134444	57614	RELCH	-0.585319	6.42756	0.000524213	0.00438337
ENSG00000105583	51398	WDR83OS	-0.585283	5.46024	1.85186e-05	0.00050879

## Sheet: Invitro Upregulated
ENSEMBL	ENTREZID	SYMBOL	logFC	AveExpr	P.Value	adj.P.Val
ENSG00000169509	54544	CRCT1	5.19665	5.0144	7.17018e-06	0.00120842
ENSG00000189001	374897	SBSN	4.4722	5.03942	0.000316949	0.0112143
ENSG00000238266	100507127	LINC00707	3.48699	4.18027	0.000718208	0.0182746
ENSG00000163216	6703	SPRR2D	3.29672	6.75806	7.07379e-05	0.00473795
ENSG00000186474	43849	KLK12	3.23474	3.89152	0.00289831	0.0420728
ENSG00000170477	3851	KRT4	3.07991	6.88533	0.0024429	0.03827
ENSG00000254614	728975	CAPN1-AS1	3.0687	4.37275	2.93274e-06	0.000605008
ENSG00000178372	51806	CALML5	3.03808	5.31527	0.000923174	0.0212295
ENSG00000088002	6820	SULT2B1	2.93354	6.6058	7.18162e-06	0.00120842
ENSG00000155918	154064	RAET1L	2.87223	5.15281	1.81722e-07	9.47706e-05
ENSG00000229526	339244	KRT16P4	2.84154	4.08123	0.00125121	0.0247963
ENSG00000087495	116154	PHACTR3	2.68981	4.95144	3.16014e-05	0.00286334
ENSG00000081181	384	ARG2	2.64763	4.42146	0.00100037	0.0222086
ENSG00000102886	79153	GDPD3	2.60763	4.47105	7.28141e-05	0.00482315
ENSG00000169035	5650	KLK7	2.60584	6.13826	0.000517397	0.0148727
ENSG00000159527	114771	PGLYRP3	2.4124	3.69014	0.00230122	0.0370137
ENSG00000133328	54979	PLAAT2	2.37773	4.3051	0.0031936	0.0446884
ENSG00000171476	84525	HOPX	2.26576	5.76943	0.000773813	0.0189382
ENSG00000256812	84290	CAPNS2	2.24988	6.7822	7.59291e-05	0.00500229
ENSG00000214783	84820	POLR2J4	2.24239	4.82701	8.72489e-06	0.00135555
ENSG00000154227	204219	CERS3	2.23553	4.3434	0.00336462	0.0456671
ENSG00000172927	26579	MYEOV	2.23237	3.41191	0.00343288	0.0459275
ENSG00000172818	5017	OVOL1	2.23093	5.38234	3.87645e-06	0.000715851
ENSG00000136695	26525	IL36RN	2.23061	3.21465	0.000344419	0.0117915
ENSG00000224259	100505633	LINC01133	2.22073	6.11177	2.97838e-06	0.000605008
ENSG00000078018	4133	MAP2	2.21197	4.96265	3.75158e-06	0.000714442
ENSG00000145911	23138	N4BP3	2.20726	3.8478	6.04284e-05	0.00432655
ENSG00000162772	467	ATF3	2.20637	4.78633	0.00182292	0.0316492
ENSG00000141579	79755	ZNF750	2.20021	5.83793	1.37396e-05	0.00186827
ENSG00000197822	100506658	OCLN	2.18523	4.69497	5.85933e-06	0.0010502
ENSG00000241794	6700	SPRR2A	2.1795	7.3651	3.2662e-05	0.00288467
ENSG00000179148	59344	ALOXE3	2.16772	3.432	0.000489351	0.0144806
ENSG00000087128	28983	TMPRSS11E	2.15462	5.06103	0.000172324	0.00781494
ENSG00000163209	6707	SPRR3	2.14725	7.98306	0.000193463	0.00842003
ENSG00000197632	5055	SERPINB2	2.13963	8.08734	1.09918e-09	3.34921e-06
ENSG00000164520	135250	RAET1E	2.07167	5.49939	0.000300744	0.0108966
ENSG00000197191	375791	CYSRT1	1.99774	5.42727	0.000780917	0.0190356
ENSG00000167656	8581	LY6D	1.99	7.64262	0.00116841	0.0238935
ENSG00000184574	57121	LPAR5	1.98411	4.67195	5.49689e-05	0.00413556
ENSG00000164855	202915	TMEM184A	1.9517	5.24623	0.00040659	0.0126491
ENSG00000128604	3663	IRF5	1.93102	4.12062	0.00023999	0.00959017
ENSG00000134531	2012	EMP1	1.91748	7.44201	1.86618e-07	9.47706e-05
ENSG00000152766	118932	ANKRD22	1.89266	4.72044	0.0016687	0.0299064
ENSG00000136155	8796	SCEL	1.85862	6.76416	4.37735e-08	4.25681e-05
ENSG00000258689	103695436	LINC01269	1.83529	4.45203	0.000576189	0.0160333
ENSG00000116701	4688	NCF2	1.81577	5.8904	5.68124e-05	0.00422213
ENSG00000169550	143662	MUC15	1.80008	3.978	0.00242698	0.0382387
ENSG00000126368	9572	NR1D1	1.76276	5.37436	0.000300195	0.0108966
ENSG00000163207	3713	IVL	1.70522	7.4752	0.00112698	0.023413
ENSG00000134824	9415	FADS2	1.70291	6.46411	0.000207537	0.00872228
ENSG00000173210	22885	ABLIM3	1.70238	4.71937	0.00105932	0.0228157
ENSG00000188277	643338	C15orf62	1.69376	3.74759	0.0029231	0.0422618
ENSG00000241322	374286	FBXW10B	1.69059	3.261	0.000298402	0.010889
ENSG00000161249	93099	DMKN	1.68447	6.36452	0.000359259	0.0120624
ENSG00000109846	1410	CRYAB	1.67737	6.51731	0.001066	0.0228447
ENSG00000102243	51442	VGLL1	1.67034	6.12584	5.94187e-05	0.00428518
ENSG00000237330	401934	RNF223	1.65278	3.54416	0.00256217	0.0393793
ENSG00000171368	11076	TPPP	1.6308	3.99283	0.00263327	0.0399183
ENSG00000114638	7348	UPK1B	1.60566	7.22221	2.75826e-05	0.0026488
ENSG00000101213	5753	PTK6	1.60193	5.24098	0.00179764	0.0314375
ENSG00000167767	144501	KRT80	1.58844	5.72919	0.00013182	0.00692499
ENSG00000170006	201799	TMEM154	1.58816	5.34464	0.00012213	0.00658639
ENSG00000176092	55057	CRYBG2	1.56029	6.2477	3.52626e-07	0.00013258
ENSG00000138709	55132	LARP1B	1.55513	4.3089	0.000369196	0.0122276
ENSG00000129451	5655	KLK10	1.53304	8.08089	9.50587e-05	0.00559698
ENSG00000137193	5292	PIM1	1.51676	6.70353	4.95097e-07	0.000157693
ENSG00000186832	3868	KRT16	1.51165	9.04626	0.00210556	0.0350876
ENSG00000100842	10278	EFS	1.50067	5.30144	0.00179868	0.0314375
ENSG00000189433	127534	GJB4	1.45568	5.27172	0.000653307	0.0172723
ENSG00000156675	80223	RAB11FIP1	1.44632	6.27874	2.14637e-06	0.000475636
ENSG00000166689	144100	PLEKHA7	1.43161	4.54733	0.000596988	0.0165366
ENSG00000144452	26154	ABCA12	1.42596	5.03926	0.000725835	0.0183157
ENSG00000110375	7379	UPK2	1.42381	5.3525	0.00214155	0.0354636
ENSG00000187583	84069	PLEKHN1	1.41438	5.01353	0.000228304	0.00927522
ENSG00000106078	23242	COBL	1.38892	3.99873	0.00174126	0.0308019
ENSG00000160796	23218	NBEAL2	1.38408	6.29014	0.000309655	0.011133
ENSG00000169469	6699	SPRR1B	1.38258	9.67312	9.79958e-07	0.000258944
ENSG00000144063	7851	MALL	1.3752	7.57199	1.2672e-05	0.00179713
ENSG00000102349	11279	KLF8	1.36698	3.66389	0.00190553	0.0327108
ENSG00000166535	144568	A2ML1	1.34727	7.0259	0.000285203	0.0106627
ENSG00000197279	7718	ZNF165	1.34664	3.88835	0.00324755	0.0450287
ENSG00000124429	79983	POF1B	1.34017	5.25652	0.000629185	0.0169657
ENSG00000176845	284207	METRNL	1.31631	6.71706	5.87565e-05	0.00426265
ENSG00000165304	9833	MELK	1.30846	4.14837	0.00162055	0.0292983
ENSG00000187642	84808	PERM1	1.29758	5.15831	0.000107172	0.00599183
ENSG00000167880	2125	EVPL	1.28642	6.87394	0.000625998	0.0169493
ENSG00000235823	90271	OLMALINC	1.28351	3.68041	0.0006474	0.0172282
ENSG00000225855	284618	RUSC1-AS1	1.28279	3.50428	0.00304811	0.0435016
ENSG00000111846	2651	GCNT2	1.27805	3.77787	0.00146051	0.0274506
ENSG00000166396	8710	SERPINB7	1.26238	6.5249	1.49824e-05	0.00190214
ENSG00000203722	353091	RAET1G	1.2578	7.10602	0.000172483	0.00781494
ENSG00000147394	7739	ZNF185	1.24808	6.56174	0.000138886	0.00707418
ENSG00000117114	23266	ADGRL2	1.245	4.41255	0.00110542	0.0233434
ENSG00000143217	81607	NECTIN4	1.24467	6.77525	0.000143945	0.00707418
ENSG00000171017	80131	LRRC8E	1.23432	5.4947	0.000874382	0.0205337
ENSG00000259153	100506411	MAP3K9-DT	1.22451	5.37577	0.00110703	0.0233434
ENSG00000187091	5333	PLCD1	1.22429	6.69628	0.000156972	0.00738676
ENSG00000127328	117177	RAB3IP	1.21426	4.88834	0.000130491	0.00688494
ENSG00000170522	79071	ELOVL6	1.20784	5.79333	0.000578306	0.0160556
ENSG00000131620	55107	ANO1	1.19422	5.30769	0.000574626	0.0160264
ENSG00000099194	6319	SCD	1.19375	8.58713	0.000150559	0.00728181
ENSG00000130940	54897	CASZ1	1.19278	4.57885	5.80759e-05	0.00425992
ENSG00000119640	97	ACYP1	1.17459	5.01621	0.00018639	0.00826082
ENSG00000072310	6720	SREBF1	1.17301	6.64699	1.79442e-08	2.18703e-05
ENSG00000162069	146439	BICDL2	1.17205	5.16769	0.00308454	0.0436351
ENSG00000158055	57822	GRHL3	1.13616	6.44224	0.00290413	0.0420874
ENSG00000104219	51201	ZDHHC2	1.1303	4.64474	0.00105954	0.0228157
ENSG00000128283	11135	CDC42EP1	1.12852	7.35597	0.000155804	0.00737205
ENSG00000128422	3872	KRT17	1.12749	10.8534	9.30608e-05	0.00551276
ENSG00000149485	3992	FADS1	1.12726	6.25788	0.000721654	0.018281
ENSG00000140474	25989	ULK3	1.11663	4.75066	0.000139347	0.00707418
ENSG00000188112	647024	C6orf132	1.10995	6.85424	1.91912e-05	0.00212638
ENSG00000100739	623	BDKRB1	1.10643	3.22332	0.00344263	0.0459958
ENSG00000256940	105369340	PPP1R14B-AS1	1.10256	6.68752	4.78097e-05	0.0037121
ENSG00000179094	5187	PER1	1.0899	6.5814	0.000953354	0.0216315
ENSG00000134317	29841	GRHL1	1.0698	5.59155	0.00197929	0.0335516
ENSG00000164695	92421	CHMP4C	1.06484	6.46936	4.50378e-05	0.00364339
ENSG00000139514	6541	SLC7A1	1.04916	6.68775	7.11393e-05	0.00473795
ENSG00000115758	4953	ODC1	1.0474	6.71593	0.00166515	0.0298893
ENSG00000147676	114569	MAL2	1.02112	7.61826	0.00198458	0.0335945
ENSG00000156299	7074	TIAM1	1.02067	4.34856	0.00279625	0.0414607
ENSG00000139437	84260	TCHP	1.00098	5.22539	0.00062453	0.0169493
ENSG00000166170	9529	BAG5	0.999336	5.56411	0.000146411	0.0071094
ENSG00000141738	2886	GRB7	0.993573	4.97093	0.0029664	0.0425848
ENSG00000213214	445328	ARHGEF35	0.991779	5.87968	0.000637806	0.0170848
ENSG00000153879	1054	CEBPG	0.990153	5.8114	8.6209e-05	0.00531048
ENSG00000250565	90423	ATP6V1E2	0.981087	3.40156	0.0011141	0.0233831
ENSG00000219665	101928464	ZNF433-AS1	0.976786	4.57271	0.000690637	0.0179483
ENSG00000133030	23164	MPRIP	0.96799	6.54444	7.73408e-05	0.00506181
ENSG00000072736	4775	NFATC3	0.961081	4.48168	0.0017259	0.0305746
ENSG00000214176	440456	PLEKHM1P1	0.95059	4.53139	0.000351156	0.0118886
ENSG00000112651	51069	MRPL2	0.948259	6.34238	3.33812e-05	0.00292698
ENSG00000187605	200424	TET3	0.945269	4.56707	0.000739931	0.0185561
ENSG00000167600	29785	CYP2S1	0.941793	7.18829	0.0010336	0.0226166
ENSG00000256073	84996	URB1-AS1	0.941325	4.64927	0.00266925	0.0402136
ENSG00000204267	6891	TAP2	0.941251	6.00957	0.00287658	0.0419376
ENSG00000104067	7082	TJP1	0.939438	6.04521	0.000282281	0.0106097
ENSG00000141458	4864	NPC1	0.936272	6.13868	1.87782e-05	0.00211915
ENSG00000160213	1476	CSTB	0.935949	8.14073	7.98625e-05	0.00506961
ENSG00000189143	1364	CLDN4	0.934157	8.26528	0.00327569	0.0451817
ENSG00000060762	51660	MPC1	0.929127	5.97012	0.00336549	0.0456671
ENSG00000154359	91694	LONRF1	0.921094	3.47509	0.00196593	0.0334181
ENSG00000187736	79840	NHEJ1	0.919676	3.98163	0.00362463	0.0474855
ENSG00000136153	4008	LMO7	0.904818	7.07993	0.000123922	0.00665357
ENSG00000148429	9712	USP6NL	0.903774	5.17005	0.00113198	0.0234238
ENSG00000174951	2523	FUT1	0.898489	4.73854	0.000942265	0.0215377
ENSG00000204438	7918	GPANK1	0.89705	4.85619	0.00211488	0.0351652
ENSG00000153714	286343	LURAP1L	0.891593	5.72779	0.00153586	0.0283193
ENSG00000132170	5468	PPARG	0.887917	4.42796	0.00328229	0.0451817
ENSG00000159479	112950	MED8	0.886042	5.8094	5.31925e-05	0.00402677
ENSG00000124466	27076	LYPD3	0.882656	8.15936	0.00336293	0.0456671
ENSG00000104859	11129	CLASRP	0.873229	5.46718	0.00103837	0.0226439
ENSG00000198517	7975	MAFK	0.861827	5.93283	0.00244102	0.03827
ENSG00000057294	5318	PKP2	0.854642	6.38085	0.00158636	0.0289439
ENSG00000161265	199746	U2AF1L4	0.850877	3.74305	0.00250977	0.0389174
ENSG00000196705	170959	ZNF431	0.85029	4.83218	0.000444571	0.0136142
ENSG00000153391	125476	INO80C	0.849554	5.95116	0.00261556	0.0397984
ENSG00000168575	6575	SLC20A2	0.838621	6.99621	1.79756e-05	0.0020847
ENSG00000153046	9425	CDYL	0.837495	5.80123	4.26383e-05	0.00353521
ENSG00000136802	56262	LRRC8A	0.833711	7.60989	0.000246067	0.00967439
ENSG00000082438	22837	COBLL1	0.83335	5.05981	0.00212122	0.0352226
ENSG00000155330	388272	C16orf87	0.820518	4.62126	0.00339713	0.0456671
ENSG00000153485	26175	LYSET	0.814933	4.99991	0.00154067	0.0283224
ENSG00000147100	6567	SLC16A2	0.807569	6.18586	0.0003949	0.0126309
ENSG00000188910	2707	GJB3	0.806284	7.22584	0.000190471	0.00838073
ENSG00000183044	18	ABAT	0.802782	5.48317	0.00389625	0.0492098
ENSG00000087074	23645	PPP1R15A	0.802734	7.45506	0.00204836	0.0343351
ENSG00000104689	8797	TNFRSF10A	0.796191	5.97463	0.00386206	0.0488286
ENSG00000100296	8563	THOC5	0.796012	4.96578	0.000996579	0.0221784
ENSG00000198399	50618	ITSN2	0.795836	4.96737	0.00269873	0.0404577
ENSG00000204681	2550	GABBR1	0.794463	4.48667	0.00307124	0.0436219
ENSG00000135046	301	ANXA1	0.787099	9.53353	7.5789e-07	0.00021257
ENSG00000136689	3557	IL1RN	0.780912	8.18654	0.00161074	0.0292574
ENSG00000092445	7301	TYRO3	0.779374	4.79595	0.00253745	0.0392468
ENSG00000120699	11340	EXOSC8	0.775055	5.70945	0.00188951	0.032568
ENSG00000185164	283820	NOMO2	0.767463	6.86785	0.00322276	0.0449152
ENSG00000185164	102723728	LOC102723728	0.767463	6.86785	0.00322276	0.0449152
ENSG00000112033	5467	PPARD	0.763106	7.16736	0.00165471	0.0297457
ENSG00000155368	1622	DBI	0.762015	8.36132	7.07882e-05	0.00473795
ENSG00000205420	3853	KRT6A	0.761767	10.9347	0.000156044	0.00737205
ENSG00000141198	10040	TOM1L1	0.755146	5.45075	0.00372625	0.0478563
ENSG00000166562	90701	SEC11C	0.752845	6.28496	0.00167101	0.0299064
ENSG00000114019	51421	AMOTL2	0.737563	6.11033	0.00146625	0.0274933
ENSG00000155545	166968	MIER3	0.736959	4.31602	0.00328413	0.0451817
ENSG00000206527	201562	HACD2	0.736562	6.95766	0.00289756	0.0420728
ENSG00000099812	126353	MISP	0.733103	7.93911	0.000599049	0.0165501
ENSG00000150782	3606	IL18	0.729359	6.33276	0.00366524	0.0477265
ENSG00000164543	9263	STK17A	0.725484	6.3022	2.94727e-05	0.00276318
ENSG00000166833	89797	NAV2	0.722109	5.45761	0.000438496	0.0134959
ENSG00000261609	8139	GAN	0.714038	4.02102	0.00362242	0.0474855
ENSG00000106105	2617	GARS1	0.710915	7.66046	0.00264753	0.040021
ENSG00000244274	55861	DBNDD2	0.702062	6.37177	0.002424	0.0382387
ENSG00000088726	55287	TMEM40	0.695597	7.04131	0.000679245	0.0177653
ENSG00000187118	152100	CMC1	0.695535	5.66901	0.00341069	0.0456807
ENSG00000120129	1843	DUSP1	0.691399	7.01075	0.002003	0.0337657
ENSG00000128016	7538	ZFP36	0.690905	7.26199	0.000479864	0.0143192
ENSG00000168958	56947	MFF	0.69011	6.34584	0.000125962	0.00670404
ENSG00000095203	54566	EPB41L4B	0.687468	5.73207	0.000542268	0.0154289
ENSG00000137203	7020	TFAP2A	0.686776	6.00709	0.000214914	0.00900127
ENSG00000130779	6249	CLIP1	0.673165	5.83897	0.00221144	0.0362271
ENSG00000136504	11143	KAT7	0.672736	5.0826	0.00322824	0.0449152
ENSG00000115159	2820	GPD2	0.670102	6.04132	0.00150173	0.0279436
ENSG00000166971	64400	AKTIP	0.669769	5.58694	0.00337367	0.0456671
ENSG00000164182	91942	NDUFAF2	0.669557	6.94822	0.00227795	0.0369689
ENSG00000152795	9987	HNRNPDL	0.666918	7.32805	0.00023843	0.00959017
ENSG00000205744	79958	DENND1C	0.66544	5.84033	0.00285515	0.0418076
ENSG00000136628	2058	EPRS1	0.664621	7.15535	0.00356751	0.0470063
ENSG00000257103	26065	LSM14A	0.661747	6.51799	0.00180041	0.0314375
ENSG00000129353	57153	SLC44A2	0.66083	7.6578	0.000152144	0.00730049
ENSG00000128272	468	ATF4	0.657363	8.80078	0.0017455	0.0308321
ENSG00000188522	644815	FAM83G	0.655923	6.79227	0.000282582	0.0106097
ENSG00000198142	65124	SOWAHC	0.655862	6.34693	0.00111904	0.0233943
ENSG00000115042	51011	FAHD2A	0.651848	5.43563	0.00106868	0.022851
ENSG00000172939	9943	OXSR1	0.650599	6.88907	0.000397275	0.0126309
ENSG00000167114	10999	SLC27A4	0.650058	6.34647	0.000961481	0.021701
ENSG00000182795	79098	C1orf116	0.646309	7.43722	0.000218493	0.00911986
ENSG00000183111	389337	ARHGEF37	0.645261	6.53288	0.00383966	0.0487982
ENSG00000152518	678	ZFP36L2	0.639749	7.18073	0.000398653	0.0126309
ENSG00000124831	9208	LRRFIP1	0.638961	6.38263	0.00152629	0.0282711
ENSG00000114030	3836	KPNA1	0.637813	6.0123	0.00396357	0.0498535
ENSG00000246705	55766	H2AJ	0.630685	7.28119	0.0034658	0.0460725
ENSG00000173812	10209	EIF1	0.625072	8.26153	0.000204444	0.00862202
ENSG00000111371	81539	SLC38A1	0.624485	7.36224	0.00169946	0.0302823
ENSG00000196449	79693	YRDC	0.617092	6.21419	0.00120808	0.0243127
ENSG00000179912	22864	R3HDM2	0.611812	5.28146	0.00291476	0.0421913
ENSG00000127824	7277	TUBA4A	0.611613	8.08704	0.00111659	0.0233831
ENSG00000148672	2746	GLUD1	0.602554	7.07265	0.000224549	0.00924594
ENSG00000081721	11266	DUSP12	0.602318	5.69675	0.00293112	0.0422801
ENSG00000162734	8682	PEA15	0.602213	7.98861	0.00125369	0.0248053
ENSG00000107404	1855	DVL1	0.599781	7.05962	0.00348886	0.0462198
ENSG00000123130	23597	ACOT9	0.597627	6.30462	0.000987391	0.0220409
ENSG00000112305	60682	SMAP1	0.595891	5.72073	0.00079729	0.0193108

## Sheet: Invitro Downregulated
ENSEMBL	ENTREZID	SYMBOL	logFC	AveExpr	P.Value	adj.P.Val
ENSG00000243509	8771	TNFRSF6B	-4.97106	3.44844	1.43602e-05	0.00188196
ENSG00000125999	92747	BPIFB1	-4.89373	5.07865	3.50697e-08	3.88572e-05
ENSG00000159167	6781	STC1	-4.68599	3.68854	3.69849e-07	0.00013258
ENSG00000164692	1278	COL1A2	-4.56155	4.34359	0.000635302	0.0170552
ENSG00000118849	5918	RARRES1	-4.37911	3.81509	1.77992e-08	2.18703e-05
ENSG00000162949	92291	CAPN13	-4.24819	5.12417	1.14857e-07	7.36778e-05
ENSG00000198183	51297	BPIFA1	-4.10756	7.02651	3.51582e-06	0.000680172
ENSG00000205403	3426	CFI	-4.08079	2.44426	8.27989e-13	1.00915e-08
ENSG00000131050	140683	BPIFA2	-4.00206	4.07424	1.53156e-09	3.73334e-06
ENSG00000137673	4316	MMP7	-3.94766	3.24846	2.5143e-07	0.000109444
ENSG00000047457	1356	CP	-3.88155	5.04226	5.48143e-10	2.22692e-06
ENSG00000159763	5304	PIP	-3.65866	6.30713	1.57951e-06	0.000377472
ENSG00000162896	5284	PIGR	-3.62244	6.19524	3.27349e-06	0.000654055
ENSG00000131203	3620	IDO1	-3.53614	2.99179	4.54042e-08	4.25681e-05
ENSG00000130303	684	BST2	-3.46536	5.71142	9.5985e-05	0.00559873
ENSG00000163331	92196	DAPL1	-3.34274	5.32123	0.000231211	0.00936213
ENSG00000160180	7033	TFF3	-3.29996	3.71955	0.000316076	0.0112143
ENSG00000182492	633	BGN	-3.29834	5.18212	0.00230799	0.0370617
ENSG00000243836	100131176	WDR86-AS1	-3.28673	3.38568	1.3724e-08	2.18101e-05
ENSG00000137033	90865	IL33	-3.28075	5.09974	1.57604e-05	0.00194029
ENSG00000161905	246	ALOX15	-3.2427	4.06383	9.11773e-05	0.00547423
ENSG00000183486	4600	MX2	-3.242	3.4825	0.00189187	0.032568
ENSG00000104368	5327	PLAT	-3.23454	5.19141	0.00022093	0.0091901
ENSG00000175538	10008	KCNE3	-3.22156	3.31498	9.98554e-07	0.000258944
ENSG00000198959	7052	TGM2	-3.21857	5.57379	0.000664003	0.017517
ENSG00000167191	51704	GPRC5B	-3.19459	2.96435	1.2353e-08	2.18101e-05
ENSG00000175928	57633	LRRN1	-3.14294	4.39482	1.66915e-05	0.00201422
ENSG00000244485	441775	RPL18P13	-3.07207	3.59432	0.000325321	0.0113286
ENSG00000006210	6376	CX3CL1	-3.06919	3.76595	0.000504688	0.0146805
ENSG00000134873	9071	CLDN10	-3.06369	5.41234	2.55795e-06	0.000556719
ENSG00000134986	9315	NREP	-3.06136	4.05952	0.00153957	0.0283224
ENSG00000214263	400141	RPSAP53	-3.0443	3.46157	1.91235e-05	0.00212638
ENSG00000196136	12	SERPINA3	-2.98129	6.26091	1.04345e-07	7.36778e-05
ENSG00000124116	140686	WFDC3	-2.97474	3.68818	2.32208e-07	0.000108852
ENSG00000186340	7058	THBS2	-2.96265	3.23661	0.000379875	0.0123032
ENSG00000007306	1087	CEACAM7	-2.93874	3.37325	0.000170404	0.00777861
ENSG00000107159	768	CA9	-2.92439	5.4481	4.09035e-07	0.000138536
ENSG00000168481	203190	LGI3	-2.87486	3.47266	2.45195e-07	0.000109444
ENSG00000213326	644315	RPS7P11	-2.87082	2.74878	0.00134514	0.0260547
ENSG00000124875	6372	CXCL6	-2.8375	4.24544	3.01745e-05	0.00280738
ENSG00000156755	3532	IGKV1OR-2	-2.7996	2.41213	0.000277848	0.0105496
ENSG00000226948	92507	RPS4XP2	-2.79883	3.86017	0.000489254	0.0144806
ENSG00000186377	260293	CYP4X1	-2.77549	4.05226	2.40755e-10	1.46716e-06
ENSG00000149131	710	SERPING1	-2.76204	4.435	4.91792e-07	0.000157693
ENSG00000086696	3294	HSD17B2	-2.74157	5.04012	2.98042e-07	0.000121084
ENSG00000148735	79949	PLEKHS1	-2.72334	3.46386	1.01913e-05	0.00153347
ENSG00000182326	716	C1S	-2.70506	3.58691	9.89131e-07	0.000258944
ENSG00000126709	2537	IFI6	-2.69941	6.82804	0.000473996	0.0142997
ENSG00000116132	5396	PRRX1	-2.6733	3.57675	0.00275023	0.0409277
ENSG00000132530	54739	XAF1	-2.65853	2.97778	0.00366278	0.0477265
ENSG00000117643	57134	MAN1C1	-2.63397	3.44021	1.47636e-07	8.99694e-05
ENSG00000175040	9435	CHST2	-2.61819	3.98237	0.000863565	0.0204371
ENSG00000229132	100421533	EIF4A1P10	-2.61278	4.45209	0.000318359	0.0112143
ENSG00000250722	6414	SELENOP	-2.60017	5.20839	5.22147e-07	0.000159098
ENSG00000159212	54102	CLIC6	-2.58729	4.47413	0.000270851	0.0104111
ENSG00000269374	732229	LOC732229	-2.57905	2.99676	0.00178413	0.0313329
ENSG00000240540	100128963	RPL3P9	-2.55986	3.27208	0.000303635	0.0109488
ENSG00000232499	100421402	LOC100421402	-2.55664	3.19274	0.00106651	0.0228447
ENSG00000231767	100271374	RPS27AP5	-2.54675	3.99047	0.0013809	0.0263386
ENSG00000049089	1298	COL9A2	-2.54496	3.54657	6.9476e-05	0.00473795
ENSG00000165507	11067	DEPP1	-2.54104	4.18418	0.00039899	0.0126309
ENSG00000242058	645573	RPS4XP19	-2.52995	3.78055	0.000292452	0.0108012
ENSG00000237807	100507516	LINC02984	-2.52647	3.0708	3.6447e-07	0.00013258
ENSG00000267119	100129975	RPL10P15	-2.50653	3.64418	0.000722516	0.018281
ENSG00000188856	389672	RPSAP47	-2.50198	4.06366	0.000709551	0.0181289
ENSG00000166073	11245	GPR176	-2.50018	3.73288	0.000271639	0.0104111
ENSG00000100031	2678	GGT1	-2.48841	4.44378	1.43158e-08	2.18101e-05
ENSG00000184371	1435	CSF1	-2.4839	4.21124	4.38116e-05	0.00358373
ENSG00000214182	150928	PTMAP5	-2.4785	5.97214	0.000287796	0.0106941
ENSG00000188873	253986	RPL10AP2	-2.4692	3.29348	0.000118541	0.00644988
ENSG00000156113	3778	KCNMA1	-2.46899	3.67839	4.09876e-05	0.00344522
ENSG00000172794	326624	RAB37	-2.46677	4.08504	5.04971e-08	4.39614e-05
ENSG00000204257	3108	HLA-DMA	-2.45216	4.07554	4.09197e-07	0.000138536
ENSG00000113083	4015	LOX	-2.4453	4.60758	2.33841e-05	0.00247831
ENSG00000106688	6505	SLC1A1	-2.44172	3.01281	2.46743e-05	0.00253019
ENSG00000184454	400746	NCMAP	-2.43459	2.73542	1.26808e-05	0.00179713
ENSG00000183196	4166	CHST6	-2.42958	4.01745	0.000202605	0.00857413
ENSG00000125730	718	C3	-2.41286	8.21135	2.75837e-05	0.0026488
ENSG00000182179	7318	UBA7	-2.41196	4.18672	5.04596e-07	0.000157693
ENSG00000204262	1290	COL5A2	-2.40182	4.52979	0.00114315	0.0236147
ENSG00000140285	2252	FGF7	-2.35515	3.17508	0.00125025	0.0247963
ENSG00000235605	100271066	RPS15P2	-2.35153	2.97811	0.000244793	0.00965544
ENSG00000196126	3123	HLA-DRB1	-2.34353	3.11314	0.000146337	0.0071094
ENSG00000116962	4811	NID1	-2.31852	3.15613	0.000745541	0.0186202
ENSG00000134398	10595	ERN2	-2.31846	4.77439	4.80629e-05	0.0037121
ENSG00000165496	140801	RPL10L	-2.29625	3.78463	0.00083117	0.0199024
ENSG00000157765	10568	SLC34A2	-2.28897	6.12953	0.000689412	0.0179483
ENSG00000171227	140738	TMEM37	-2.28489	3.72527	0.000554571	0.01561
ENSG00000138131	84171	LOXL4	-2.27911	4.48359	1.79017e-07	9.47706e-05
ENSG00000198488	192134	B3GNT6	-2.27762	3.24687	0.0027607	0.0410335
ENSG00000125430	9953	HS3ST3B1	-2.2655	3.13939	3.36513e-06	0.000661519
ENSG00000239713	60489	APOBEC3G	-2.22578	3.52521	1.35793e-06	0.00033101
ENSG00000182853	284013	VMO1	-2.22274	4.89465	0.000380563	0.0123032
ENSG00000137462	7097	TLR2	-2.21362	4.11697	0.000195212	0.00842003
ENSG00000103534	79838	TMC5	-2.20468	3.791	2.23931e-05	0.00243685
ENSG00000019582	972	CD74	-2.20358	6.48923	2.6949e-07	0.00011326
ENSG00000159403	715	C1R	-2.19601	5.16217	1.6867e-05	0.00201544
ENSG00000157613	90993	CREB3L1	-2.19201	5.0884	0.000357225	0.0120272
ENSG00000236148	130773	RPL23AP37	-2.19077	3.15175	0.00112851	0.023413
ENSG00000157601	4599	MX1	-2.19061	5.98199	0.00379535	0.0484374
ENSG00000123095	79365	BHLHE41	-2.18882	3.63361	3.83614e-06	0.000715851
ENSG00000233597	100270946	RPL19P6	-2.18428	4.79386	0.000812358	0.0195672
ENSG00000135218	948	CD36	-2.18395	3.62405	0.000200595	0.00851863
ENSG00000170458	929	CD14	-2.17372	3.91295	1.13543e-05	0.0016673
ENSG00000243504	93948	RPS23P1	-2.17345	4.6129	0.000883504	0.0206505
ENSG00000132329	10267	RAMP1	-2.17223	3.94202	5.83695e-05	0.00425992
ENSG00000243649	629	CFB	-2.17189	6.2322	0.000410863	0.012742
ENSG00000149090	25891	PAMR1	-2.16406	3.99466	0.000142076	0.00707418
ENSG00000174080	8722	CTSF	-2.15879	5.19179	3.59422e-07	0.00013258
ENSG00000042980	10863	ADAM28	-2.14428	4.20356	1.64706e-07	9.47706e-05
ENSG00000225338	728134	RPL23AP18	-2.14329	5.07451	0.00240039	0.0380938
ENSG00000255071	100528017	SAA2-SAA4	-2.12589	3.61492	0.000550505	0.0155674
ENSG00000267258	126170	PPIAP58	-2.12473	3.19789	0.00148232	0.0276277
ENSG00000197249	5265	SERPINA1	-2.11301	4.17079	1.4833e-05	0.00190214
ENSG00000248485	654790	PCP4L1	-2.1055	4.86167	8.1142e-05	0.00512414
ENSG00000065534	4638	MYLK	-2.10267	4.22597	0.000376537	0.0122707
ENSG00000171236	116844	LRG1	-2.09907	4.90847	1.95569e-06	0.000441406
ENSG00000206073	6318	SERPINB4	-2.09369	5.52789	0.00072296	0.018281
ENSG00000119714	8111	GPR68	-2.09107	4.16365	0.000489499	0.0144806
ENSG00000134258	79679	VTCN1	-2.07745	5.40475	9.09504e-05	0.00547423
ENSG00000228399	100270900	RPS20P6	-2.07431	3.99451	0.000158616	0.00743544
ENSG00000139192	55080	TAPBPL	-2.07204	5.56102	6.67851e-08	5.42651e-05
ENSG00000103888	57214	CEMIP	-2.06559	3.94681	0.000954852	0.0216315
ENSG00000180340	2535	FZD2	-2.06548	3.31116	0.000886135	0.0206505
ENSG00000163975	4241	MELTF	-2.06026	5.95931	0.000162709	0.00758513
ENSG00000240065	5698	PSMB9	-2.05209	4.99052	0.000277184	0.0105496
ENSG00000111110	57460	PPM1H	-2.0466	3.61507	4.81221e-05	0.0037121
ENSG00000262154	100130566	EIF1P4	-2.04338	3.56135	0.00239272	0.0380215
ENSG00000100228	9609	RAB36	-2.03916	3.35879	7.14464e-08	5.44243e-05
ENSG00000244756	654369	RPL37P5	-2.03336	4.50059	0.000650352	0.017269
ENSG00000183199	3327	HSP90AB3P	-2.03265	4.8142	0.000354541	0.0119699
ENSG00000135643	27345	KCNMB4	-2.02285	2.98007	0.000170129	0.00777861
ENSG00000189058	347	APOD	-2.01614	5.12053	8.78637e-06	0.00135555
ENSG00000001561	22875	ENPP4	-2.00377	2.74782	4.22082e-05	0.00352352
ENSG00000138449	30061	SLC40A1	-1.98203	3.32447	0.000182428	0.00811473
ENSG00000214612	85486	RPS19P1	-1.9669	5.00873	0.000696464	0.0180118
ENSG00000134827	6947	TCN1	-1.96183	6.68211	6.78854e-05	0.0046745
ENSG00000213366	2946	GSTM2	-1.9579	4.40172	0.0031576	0.0443886
ENSG00000162645	2634	GBP2	-1.95407	5.11965	4.74747e-06	0.000863614
ENSG00000228205	440991	RPS3P3	-1.94567	4.29836	0.00122449	0.0245462
ENSG00000121039	157506	RDH10	-1.94208	7.03273	7.67402e-07	0.00021257
ENSG00000142619	51702	PADI3	-1.9268	4.9568	0.00163195	0.0294233
ENSG00000188042	10123	ARL4C	-1.92008	6.27003	1.64094e-05	0.00199998
ENSG00000173227	91683	SYT12	-1.91041	4.18115	0.00163697	0.0294703
ENSG00000180596	8347	H2BC4	-1.90452	5.55547	1.1251e-07	7.36778e-05
ENSG00000140274	405753	DUOXA2	-1.90208	4.3125	0.00235982	0.0376952
ENSG00000226525	100128060	RPS7P10	-1.90096	3.82376	0.000760332	0.0188352
ENSG00000180211	646949	RPL23P6	-1.89963	4.77104	0.000798542	0.0193108
ENSG00000162366	10158	PDZK1IP1	-1.89925	6.6997	6.10573e-05	0.00432655
ENSG00000135838	80896	NPL	-1.89524	4.52547	9.99017e-05	0.00569607
ENSG00000177098	6330	SCN4B	-1.8931	3.21068	0.0019395	0.0331073
ENSG00000185885	8519	IFITM1	-1.87945	6.68437	0.000406831	0.0126491
ENSG00000234371	391598	RPSAP31	-1.87721	4.15619	0.00028762	0.0106941
ENSG00000234745	3106	HLA-B	-1.86841	8.53907	1.41025e-05	0.00186827
ENSG00000101443	10406	WFDC2	-1.86344	8.40492	0.00365328	0.0476725
ENSG00000153071	1601	DAB2	-1.86313	3.29357	0.00216756	0.0357434
ENSG00000198832	140606	SELENOM	-1.86188	5.6403	1.32662e-06	0.000329977
ENSG00000090376	11213	IRAK3	-1.85747	4.53981	2.64573e-06	0.000565722
ENSG00000253417	285629	LINC02159	-1.85578	3.49454	8.23234e-05	0.00514542
ENSG00000163050	56997	COQ8A	-1.85078	4.07076	2.74417e-05	0.0026488
ENSG00000134013	4017	LOXL2	-1.84776	6.77668	0.000668056	0.017548
ENSG00000213235	387845	EEF1A1P16	-1.84322	4.52569	0.00324048	0.0449829
ENSG00000146677	644907	RPL32P18	-1.84274	5.72081	1.81567e-05	0.0020847
ENSG00000206337	10866	HCP5	-1.83952	3.76104	0.00111417	0.0233831
ENSG00000214814	654463	FER1L6	-1.8288	6.16045	1.20421e-05	0.00174725
ENSG00000172731	55222	LRRC20	-1.82507	3.96616	0.000346768	0.0117947
ENSG00000131188	80758	PRR7	-1.82476	4.398	0.000255017	0.00993019
ENSG00000176532	222171	PRR15	-1.82304	4.62525	0.000454839	0.0138244
ENSG00000165140	2203	FBP1	-1.82076	3.45866	0.000766469	0.0188722
ENSG00000156298	7102	TSPAN7	-1.78957	3.25495	0.000118512	0.00644988
ENSG00000136149	100287887	RPL13AP25	-1.78566	3.70963	0.00175883	0.0309778
ENSG00000223877	388076	RPS8P10	-1.78315	3.59633	0.00147943	0.0276277
ENSG00000237214	267009	RPS9P2	-1.77798	3.6362	0.00137456	0.0263386
ENSG00000220323	337874	H2BC19P	-1.77369	3.62944	0.00134677	0.0260547
ENSG00000227939	116935	RPL3P2	-1.77299	4.3433	0.00142502	0.0270112
ENSG00000234750	729274	RPS2P53	-1.76839	3.65667	0.000473917	0.0142997
ENSG00000079257	56925	LXN	-1.76335	5.62204	6.13359e-06	0.00108342
ENSG00000220472	100270862	RPS3P4	-1.76206	4.43978	0.000195143	0.00842003
ENSG00000071575	28951	TRIB2	-1.75785	4.15977	3.23941e-05	0.00288189
ENSG00000105649	5864	RAB3A	-1.7461	3.41401	1.87732e-06	0.000431712
ENSG00000006016	9244	CRLF1	-1.74435	4.31659	0.00143825	0.0271773
ENSG00000131389	6533	SLC6A6	-1.74221	5.60699	0.000110241	0.00613524
ENSG00000219470	646294	RPS2P29	-1.73285	4.27228	0.000795776	0.0193108
ENSG00000170835	1056	CEL	-1.71181	6.17332	0.00116626	0.0238898
ENSG00000111801	10384	BTN3A3	-1.70151	4.3107	0.000141436	0.00707418
ENSG00000079150	51661	FKBP7	-1.6952	3.37782	0.000254571	0.00993019
ENSG00000185339	6948	TCN2	-1.69155	5.09484	9.74982e-06	0.00148538
ENSG00000233762	401019	RPS15P4	-1.68959	5.30271	0.00347047	0.0460764
ENSG00000119699	7043	TGFB3	-1.68939	4.53436	1.37664e-05	0.00186827
ENSG00000143416	8991	SELENBP1	-1.67457	5.55327	0.000710996	0.0181289
ENSG00000198719	28514	DLL1	-1.67131	5.10571	9.31759e-05	0.00551276
ENSG00000183298	730029	RPSAP19	-1.66678	4.09853	0.000141225	0.00707418
ENSG00000164120	3248	HPGD	-1.65968	3.8444	0.000387862	0.0125033
ENSG00000165029	19	ABCA1	-1.6531	5.10512	0.00281311	0.0415087
ENSG00000181143	94025	MUC16	-1.64559	4.72739	0.00192639	0.0329297
ENSG00000231735	643960	RPS2P18	-1.63987	4.28601	0.0007655	0.0188722
ENSG00000219451	222901	RPL23P8	-1.63372	5.54617	0.000452609	0.0138201
ENSG00000054690	57475	PLEKHH1	-1.6335	4.07331	0.000888101	0.0206568
ENSG00000101577	9663	LPIN2	-1.6261	4.05139	2.44088e-05	0.00253019
ENSG00000156966	93010	B3GNT7	-1.62536	5.27969	0.000402368	0.0126491
ENSG00000181524	377381	RPL24P4	-1.62249	5.57443	7.94627e-05	0.00506961
ENSG00000135083	79616	CCNJL	-1.61943	4.07824	0.00101979	0.0224331
ENSG00000188641	1806	DPYD	-1.61823	4.03731	0.000119893	0.00649445
ENSG00000213750	286150	RPS2P33	-1.60033	4.11964	0.00101022	0.0223695
ENSG00000183569	253190	SERHL2	-1.59589	3.57479	0.00108157	0.0230055
ENSG00000002587	9957	HS3ST1	-1.58874	4.63646	0.00338359	0.0456671
ENSG00000172986	727936	GXYLT2	-1.57415	4.12252	0.000176647	0.00788634
ENSG00000124664	25803	SPDEF	-1.57238	6.14144	0.00340372	0.0456671
ENSG00000073737	10170	DHRS9	-1.57162	7.18079	1.10544e-06	0.000280689
ENSG00000053918	3784	KCNQ1	-1.5577	3.62209	0.00374996	0.0480595
ENSG00000167964	25837	RAB26	-1.55019	4.18106	0.00130235	0.0255605
ENSG00000129038	4016	LOXL1	-1.54766	5.45843	0.000198425	0.00847807
ENSG00000122694	152007	GLIPR2	-1.54746	4.11641	0.00186246	0.0322438
ENSG00000167703	124935	SLC43A2	-1.54517	5.38542	8.64307e-06	0.00135555
ENSG00000026025	7431	VIM	-1.5394	8.42604	0.00321353	0.0449152
ENSG00000099864	5064	PALM	-1.53875	5.98728	0.00246563	0.0384286
ENSG00000136048	55332	DRAM1	-1.52902	5.28721	0.00049739	0.0145805
ENSG00000157350	6483	ST3GAL2	-1.52404	4.05682	0.00225753	0.0367845
ENSG00000166250	79827	CLMP	-1.524	4.43557	0.00123686	0.0246681
ENSG00000147872	123	PLIN2	-1.52109	6.36162	1.67978e-06	0.000393713
ENSG00000256612	1556	CYP2B7P	-1.51233	5.13445	0.00136428	0.0262684
ENSG00000061656	6676	SPAG4	-1.51047	3.58528	0.000766463	0.0188722
ENSG00000181104	2149	F2R	-1.50865	5.87045	0.00129378	0.0254519
ENSG00000213700	729046	RPL17P50	-1.5062	3.40842	0.000896979	0.0208236
ENSG00000169604	84168	ANTXR1	-1.49861	5.68924	1.776e-05	0.00208134
ENSG00000170525	5209	PFKFB3	-1.49338	6.35493	1.05448e-05	0.00156732
ENSG00000019186	1591	CYP24A1	-1.49336	4.65537	0.00327996	0.0451817
ENSG00000155850	1836	SLC26A2	-1.4806	5.33421	0.000622632	0.0169493
ENSG00000133321	5920	PLAAT4	-1.48049	6.54158	0.000317801	0.0112143
ENSG00000116157	2882	GPX7	-1.47971	3.64808	0.0013837	0.0263509
ENSG00000117461	8503	PIK3R3	-1.47054	5.31324	0.000163054	0.00758513
ENSG00000212802	653232	RPL15P3	-1.46995	5.62616	0.000225326	0.00924669
ENSG00000169105	113189	CHST14	-1.46868	5.20344	2.90116e-05	0.00274103
ENSG00000110811	10536	P3H3	-1.46305	4.79409	0.000750544	0.0186686
ENSG00000204385	80736	SLC44A4	-1.4597	6.64393	0.00157532	0.0288153
ENSG00000129521	112399	EGLN3	-1.4595	6.37605	0.000134374	0.00696596
ENSG00000104883	92960	PEX11G	-1.45589	4.17688	0.00120833	0.0243127
ENSG00000243701	344595	DUBR	-1.45013	3.82056	0.00373235	0.047884
ENSG00000164237	134147	CMBL	-1.44412	4.56556	7.65442e-06	0.0012607
ENSG00000113504	10723	SLC12A7	-1.44189	5.40512	9.88548e-05	0.00569607
ENSG00000026950	11119	BTN3A1	-1.44179	4.35661	0.00120152	0.0242854
ENSG00000182472	147968	CAPN12	-1.44067	3.87267	0.000801438	0.0193424
ENSG00000102934	51090	PLLP	-1.43315	5.51752	0.000376068	0.0122707
ENSG00000137868	64220	STRA6	-1.43004	4.42779	7.75817e-06	0.00126075
ENSG00000119681	4053	LTBP2	-1.42807	6.15251	0.00368353	0.0477673
ENSG00000117385	64175	P3H1	-1.42491	5.84225	0.000491136	0.0144939
ENSG00000136205	64759	TNS3	-1.4224	5.64633	2.69362e-06	0.000566033
ENSG00000102760	28984	RGCC	-1.42106	4.72105	3.69513e-05	0.00317181
ENSG00000145358	115265	DDIT4L	-1.417	3.5087	0.00229124	0.0370137
ENSG00000135916	81618	ITM2C	-1.41047	5.76312	0.00338823	0.0456671
ENSG00000172638	30008	EFEMP2	-1.4029	5.18846	0.000295493	0.0108478
ENSG00000175567	7351	UCP2	-1.40269	5.20132	0.000143545	0.00707418
ENSG00000168056	4054	LTBP3	-1.39684	6.14972	4.51388e-05	0.00364339
ENSG00000198643	131177	FAM3D	-1.39324	6.07162	0.00297738	0.0426921
ENSG00000163406	6565	SLC15A2	-1.39103	5.34064	0.000332261	0.011472
ENSG00000185100	122622	ADSS1	-1.38606	5.38024	0.00195338	0.0332975
ENSG00000106714	79937	CNTNAP3	-1.38375	3.68544	8.99995e-05	0.00545786
ENSG00000182871	80781	COL18A1	-1.38268	5.9706	7.7906e-05	0.00506181
ENSG00000253882	154761	LOC154761	-1.38037	3.94427	0.00170864	0.0303128
ENSG00000123191	540	ATP7B	-1.37783	4.63543	4.99811e-05	0.00380731
ENSG00000229638	647276	RPL4P4	-1.37036	5.67583	0.000226491	0.00924824
ENSG00000023171	57476	GRAMD1B	-1.36626	3.67185	0.000817825	0.0196601
ENSG00000100767	89932	PAPLN	-1.36484	4.60607	0.000884556	0.0206505
ENSG00000099250	8829	NRP1	-1.36425	4.66258	0.000362138	0.0121231
ENSG00000163739	2919	CXCL1	-1.35537	7.36501	0.000312771	0.0111463
ENSG00000033170	2530	FUT8	-1.3428	4.27244	0.000404394	0.0126491
ENSG00000214389	644972	RPS3AP26	-1.32961	5.28909	0.000871183	0.0205218
ENSG00000158406	8365	H4C8	-1.32419	3.82103	0.00331036	0.0453469
ENSG00000112773	55603	TENT5A	-1.32207	4.16036	0.000697535	0.0180118
ENSG00000115594	3554	IL1R1	-1.30769	5.0058	0.000563735	0.015795
ENSG00000103226	408050	NOMO3	-1.30605	5.72818	0.00236622	0.037748
ENSG00000132821	128434	VSTM2L	-1.30398	7.06252	0.000372072	0.0122707
ENSG00000229043	101927021	ZFAND2A-DT	-1.30166	3.61403	0.000239476	0.00959017
ENSG00000110881	41	ASIC1	-1.2983	4.17007	8.47146e-05	0.00526787
ENSG00000170271	10826	FAXDC2	-1.29541	4.53051	0.000321288	0.0112849
ENSG00000177707	25945	NECTIN3	-1.2951	3.43877	0.00256553	0.0393812
ENSG00000130203	348	APOE	-1.28879	7.80677	3.46243e-05	0.00301429
ENSG00000109819	10891	PPARGC1A	-1.28543	2.97879	0.00363676	0.0475588
ENSG00000105655	51477	ISYNA1	-1.28541	5.41093	2.87167e-05	0.00273437
ENSG00000088340	80307	FER1L4	-1.2838	3.15972	0.000851811	0.0202771
ENSG00000100342	8542	APOL1	-1.28148	6.58538	9.77232e-05	0.00567167
ENSG00000128594	64101	LRRC4	-1.27993	5.00677	0.00142946	0.0270531
ENSG00000101017	958	CD40	-1.2721	4.72704	0.00151245	0.0280575
ENSG00000169992	57555	NLGN2	-1.27162	5.49512	3.69542e-05	0.00317181
ENSG00000072954	79041	TMEM38A	-1.26882	4.25527	0.000899459	0.0208415
ENSG00000178685	84875	PARP10	-1.26659	5.03871	0.000282915	0.0106097
ENSG00000187624	400566	C17orf97	-1.25941	3.62395	0.00268044	0.0403324
ENSG00000119514	79695	GALNT12	-1.25921	5.25958	0.00117289	0.0239216
ENSG00000249992	25907	TMEM158	-1.25815	3.32475	0.00307443	0.0436219
ENSG00000237476	101928891	LINC01637	-1.25638	4.3301	0.00368333	0.0477673
ENSG00000154328	252969	NEIL2	-1.2531	3.94972	0.000291092	0.0107837
ENSG00000182272	338707	B4GALNT4	-1.2514	5.97081	0.000117365	0.00644988
ENSG00000165816	340706	VWA2	-1.24919	3.75903	0.000329368	0.0114369
ENSG00000146674	3486	IGFBP3	-1.24083	7.73502	0.00150796	0.0280168
ENSG00000156804	114907	FBXO32	-1.23662	6.34576	0.00318067	0.0445721
ENSG00000007944	29116	MYLIP	-1.23554	4.07158	0.000838151	0.0200302
ENSG00000065717	7089	TLE2	-1.23372	3.80379	0.00203815	0.0342163
ENSG00000163520	2199	FBLN2	-1.2296	4.77463	0.00308968	0.0436351
ENSG00000049239	9563	H6PD	-1.22705	5.617	2.33056e-05	0.00247831
ENSG00000243015	106481123	RN7SL737P	-1.2248	3.45476	0.00354355	0.0467411
ENSG00000082014	6604	SMARCD3	-1.21351	4.64558	2.021e-05	0.00221909
ENSG00000069764	8399	PLA2G10	-1.21184	2.82846	0.0023849	0.0379466
ENSG00000154930	84532	ACSS1	-1.2109	3.72461	0.00115344	0.0237067
ENSG00000189431	644943	RASSF10	-1.21018	3.90257	0.00371508	0.0478135
ENSG00000248487	25864	ABHD14A	-1.2097	4.69078	0.000513603	0.0148336
ENSG00000084636	1307	COL16A1	-1.20591	6.6877	0.00115313	0.0237067
ENSG00000254726	92312	MEX3A	-1.2011	4.47999	0.0016192	0.0292983
ENSG00000107796	59	ACTA2	-1.19767	5.54394	0.000908944	0.0209815
ENSG00000162817	79762	C1orf115	-1.19117	3.93841	0.000257244	0.00995329
ENSG00000146535	2768	GNA12	-1.1907	5.67344	6.35552e-05	0.00442635
ENSG00000179163	2517	FUCA1	-1.18722	7.41814	2.4704e-05	0.00253019
ENSG00000070526	55808	ST6GALNAC1	-1.18623	6.05094	0.000742757	0.0185888
ENSG00000114268	5210	PFKFB4	-1.18546	5.56548	3.04256e-05	0.0028093
ENSG00000160991	80228	ORAI2	-1.18315	3.9206	0.000789229	0.0191998
ENSG00000184465	253769	WDR27	-1.18291	4.40091	1.70899e-05	0.00202225
ENSG00000092421	57556	SEMA6A	-1.17813	3.62272	0.00250614	0.0389106
ENSG00000169851	5099	PCDH7	-1.1773	4.81081	0.000136816	0.00700637
ENSG00000171105	3643	INSR	-1.17621	3.28811	0.000377932	0.0122833
ENSG00000073849	6480	ST6GAL1	-1.1758	5.7967	0.00070202	0.0180893
ENSG00000126970	55906	ZC4H2	-1.16723	3.65911	0.000174103	0.00785916
ENSG00000256043	1519	CTSO	-1.16513	4.94165	0.000167791	0.00774634
ENSG00000181458	55076	TMEM45A	-1.16503	5.35916	0.000932133	0.021355
ENSG00000162407	8613	PLPP3	-1.15466	4.05758	0.000135098	0.00696596
ENSG00000119408	10783	NEK6	-1.15376	5.33451	0.000877182	0.0205598
ENSG00000101400	6640	SNTA1	-1.14584	5.00579	0.000100013	0.00569607
ENSG00000104998	9466	IL27RA	-1.13817	3.54004	0.00270635	0.0405114
ENSG00000160345	138162	PIERCE1	-1.13657	3.88421	0.00037398	0.0122707
ENSG00000078043	9063	PIAS2	-1.13217	4.24837	3.91574e-05	0.00331424
ENSG00000144749	26018	LRIG1	-1.12898	4.81809	0.00182213	0.0316492
ENSG00000134461	54522	ANKRD16	-1.12846	3.73086	0.000256206	0.00994471
ENSG00000000971	3075	CFH	-1.12387	6.8217	1.83019e-05	0.0020847
ENSG00000089723	78990	OTUB2	-1.11617	4.52267	0.000966245	0.021728
ENSG00000153246	22925	PLA2R1	-1.11584	4.21365	0.000156054	0.00737205
ENSG00000137124	219	ALDH1B1	-1.10729	6.12322	0.000958051	0.0216637
ENSG00000099840	113177	IZUMO4	-1.1061	3.6549	0.00061386	0.0168507
ENSG00000153395	79888	LPCAT1	-1.10539	6.19141	0.000175441	0.0078613
ENSG00000168916	57507	ZNF608	-1.10398	4.0819	0.000997192	0.0221784
ENSG00000167740	124936	CYB5D2	-1.09101	5.47498	0.000115306	0.00638794
ENSG00000104870	2217	FCGRT	-1.08735	5.90606	0.00119655	0.0242252
ENSG00000124635	8970	H2BC11	-1.08718	3.46056	0.000368014	0.0122217
ENSG00000188690	7390	UROS	-1.08147	6.18659	0.000347416	0.0117947
ENSG00000100271	25809	TTLL1	-1.07562	4.80165	0.000512207	0.0148285
ENSG00000234975	2497	FTH1P2	-1.07486	6.64797	0.00161587	0.0292983
ENSG00000019144	23187	PHLDB1	-1.07413	6.06928	0.00242144	0.0382387
ENSG00000121858	8743	TNFSF10	-1.07309	7.64228	1.48872e-05	0.00190214
ENSG00000104324	10404	CPQ	-1.07228	4.96857	3.17714e-05	0.00286334
ENSG00000205220	5699	PSMB10	-1.07194	6.10827	0.00157695	0.0288153
ENSG00000168778	79867	TCTN2	-1.06964	3.77681	0.00131229	0.0256779
ENSG00000184014	23258	DENND5A	-1.06957	4.79721	0.000153763	0.00734929
ENSG00000134775	80206	FHOD3	-1.06856	4.75015	0.00027023	0.0104111
ENSG00000198324	144717	PHETA1	-1.06851	4.43333	0.0020923	0.0349329
ENSG00000128928	3712	IVD	-1.06186	5.07892	5.73695e-05	0.00423769
ENSG00000108582	1362	CPD	-1.06018	7.18508	7.23784e-06	0.00120842
ENSG00000151882	56477	CCL28	-1.05869	3.45226	0.00344553	0.0459958
ENSG00000196502	6817	SULT1A1	-1.05815	5.18027	0.00379211	0.0484374
ENSG00000141756	60681	FKBP10	-1.05749	6.72533	7.07088e-05	0.00473795
ENSG00000175130	65108	MARCKSL1	-1.05583	7.86455	0.000476315	0.0143192
ENSG00000076258	2329	FMO4	-1.05159	3.5435	0.00048052	0.0143192
ENSG00000103044	3038	HAS3	-1.04992	7.30087	2.55353e-05	0.0025721
ENSG00000142798	3339	HSPG2	-1.04933	7.78416	0.000943643	0.0215377
ENSG00000128335	23780	APOL2	-1.04851	6.3393	0.00255007	0.0392923
ENSG00000006282	64847	SPATA20	-1.04302	5.58312	0.00156208	0.0286295
ENSG00000115648	79083	MLPH	-1.03946	5.85299	0.000323507	0.0112982
ENSG00000218426	389435	RPL27AP6	-1.03426	5.46127	0.00246238	0.038427
ENSG00000203724	388722	C1orf53	-1.02803	4.08006	0.00199818	0.0337311
ENSG00000101846	412	STS	-1.02764	4.9371	0.00259007	0.0396083
ENSG00000107331	20	ABCA2	-1.0161	4.49552	0.000404051	0.0126491
ENSG00000139531	6821	SUOX	-1.01574	4.72815	0.00036637	0.0122003
ENSG00000117266	5129	CDK18	-1.01378	6.15123	0.00220421	0.0361574
ENSG00000136720	9394	HS6ST1	-1.01202	7.525	0.000106133	0.00596106
ENSG00000100105	23598	PATZ1	-1.00863	4.15207	0.000298	0.010889
ENSG00000090661	79603	CERS4	-1.00795	4.10227	0.000565628	0.0158116
ENSG00000137642	6653	SORL1	-1.00746	5.6843	0.00191408	0.0327652
ENSG00000102967	1723	DHODH	-1.00641	3.74719	0.00286518	0.0418715
ENSG00000170917	11162	NUDT6	-1.00455	3.85716	0.00217311	0.0357434
ENSG00000171703	6919	TCEA2	-1.00305	5.71039	4.70978e-05	0.00370341
ENSG00000144647	84892	POMGNT2	-1.00238	4.45475	8.18256e-05	0.00514067
ENSG00000175155	388403	YPEL2	-0.988112	4.90565	0.000105495	0.00595265
ENSG00000077092	5915	RARB	-0.987482	3.69505	0.0027454	0.0409057
ENSG00000102181	83692	CD99L2	-0.987187	6.46826	0.000198944	0.00847807
ENSG00000113552	10007	GNPDA1	-0.985888	6.62639	1.57487e-05	0.00194029
ENSG00000100292	3162	HMOX1	-0.982881	5.37523	0.00105133	0.0227191
ENSG00000054983	2581	GALC	-0.974292	4.53293	0.00212965	0.0353146
ENSG00000126001	11190	CEP250	-0.96359	5.14503	0.000151736	0.00730049
ENSG00000232472	644820	EEF1B2P3	-0.963167	4.9538	0.000560845	0.0157502
ENSG00000123384	4035	LRP1	-0.957317	7.19771	0.0034641	0.0460725
ENSG00000170412	55890	GPRC5C	-0.956422	5.90309	0.00235433	0.0376569
ENSG00000162496	9249	DHRS3	-0.956062	7.66013	0.000623407	0.0169493
ENSG00000184319	118433	RPL23AP7	-0.949817	5.08035	0.00271762	0.0405911
ENSG00000184319	284942	RPL23AP82	-0.949817	5.08035	0.00271762	0.0405911
ENSG00000164877	79778	MICALL2	-0.949674	5.28909	0.000193857	0.00842003
ENSG00000100100	113791	PIK3IP1	-0.94493	7.20266	0.00104816	0.0227191
ENSG00000176022	126792	B3GALT6	-0.944916	5.27307	9.92841e-05	0.00569607
ENSG00000184012	7113	TMPRSS2	-0.944836	4.85748	0.00227144	0.0369124
ENSG00000184012	124905021	LOC124905021	-0.944836	4.85748	0.00227144	0.0369124
ENSG00000164048	51385	ZNF589	-0.9433	4.57486	0.000279993	0.010598
ENSG00000137274	670	BPHL	-0.942602	4.72234	0.00385509	0.0488169
ENSG00000010322	11188	NISCH	-0.940154	6.35836	0.000142852	0.00707418
ENSG00000174684	11041	B4GAT1	-0.939307	5.37753	0.00234151	0.0375011
ENSG00000242071	326310	RPL7AP6	-0.936924	5.48601	0.0019094	0.032731
ENSG00000151176	196463	PLBD2	-0.932154	6.66508	7.85868e-05	0.00506781
ENSG00000118762	5311	PKD2	-0.931922	4.42616	0.00196154	0.03339
ENSG00000006756	414	ARSD	-0.931309	5.52968	0.000976151	0.0219104
ENSG00000120875	1846	DUSP4	-0.928815	7.09979	0.00177905	0.0312888
ENSG00000189298	80317	ZKSCAN3	-0.927099	3.34267	0.00124401	0.024734
ENSG00000103351	23059	CLUAP1	-0.924394	5.00624	0.000543964	0.0154289
ENSG00000163513	7048	TGFBR2	-0.923235	6.92987	0.00225123	0.0367845
ENSG00000105426	5802	PTPRS	-0.919999	4.76543	0.00229365	0.0370137
ENSG00000011523	23177	CEP68	-0.916122	4.81016	0.0028256	0.0416425
ENSG00000132801	140831	ZSWIM3	-0.91547	3.50074	0.00137568	0.0263386
ENSG00000158089	79623	GALNT14	-0.914439	5.23911	0.000706474	0.0181289
ENSG00000216490	10437	IFI30	-0.902658	6.39557	0.00112214	0.0233951
ENSG00000091136	3912	LAMB1	-0.901773	7.43332	0.00258519	0.0395833
ENSG00000152291	10618	TGOLN2	-0.89974	6.218	7.07097e-05	0.00473795
ENSG00000162144	220002	CYB561A3	-0.899687	7.13603	0.00310014	0.0437321
ENSG00000141753	3487	IGFBP4	-0.898376	7.42924	0.00106149	0.0228174
ENSG00000197238	8363	H4C11	-0.894335	5.57513	0.00252586	0.0391172
ENSG00000083444	5351	PLOD1	-0.89395	7.81229	6.45582e-05	0.00447065
ENSG00000204264	5696	PSMB8	-0.888984	7.10144	2.51085e-05	0.00255019
ENSG00000196968	170384	FUT11	-0.886143	5.54361	0.00104232	0.0226448
ENSG00000162836	51205	ACP6	-0.885225	5.47037	5.55434e-05	0.00415315
ENSG00000130304	376497	SLC27A1	-0.883622	5.20834	0.000902448	0.020871
ENSG00000166548	7084	TK2	-0.883267	5.26633	0.000337891	0.0116334
ENSG00000155254	83742	MARVELD1	-0.880284	7.14315	0.00198751	0.0335975
ENSG00000138640	10144	FAM13A	-0.871157	3.61523	0.00258437	0.0395833
ENSG00000164574	55568	GALNT10	-0.870063	6.38786	0.000859769	0.0203869
ENSG00000108784	4669	NAGLU	-0.866342	6.02295	4.65544e-05	0.00368445
ENSG00000106012	23288	IQCE	-0.866076	4.19376	0.00181276	0.0315628
ENSG00000065923	84679	SLC9A7	-0.865819	4.66232	0.000954763	0.0216315
ENSG00000123933	10608	MXD4	-0.864886	6.55321	0.00369581	0.0477673
ENSG00000105429	1954	MEGF8	-0.863904	5.74902	9.0009e-05	0.00545786
ENSG00000013288	23324	MAN2B2	-0.854383	5.88892	7.10841e-06	0.00120842
ENSG00000168758	54910	SEMA4C	-0.854131	5.21593	0.00369537	0.0477673
ENSG00000139178	51279	C1RL	-0.852988	5.63124	6.0919e-05	0.00432655
ENSG00000169814	686	BTD	-0.850159	5.29668	0.000342231	0.0117496
ENSG00000184731	642273	FAM110C	-0.849953	5.81173	0.000982265	0.0219667
ENSG00000151498	27034	ACAD8	-0.848814	4.91144	0.00073646	0.0185072
ENSG00000163346	57326	PBXIP1	-0.846898	7.16607	0.000330985	0.0114604
ENSG00000067369	7158	TP53BP1	-0.844042	5.6885	2.33818e-05	0.00247831
ENSG00000243232	56134	PCDHAC2	-0.839098	3.78828	0.0032706	0.0451817
ENSG00000156587	9246	UBE2L6	-0.837561	6.93201	0.00261269	0.0397984
ENSG00000168890	129303	TMEM150A	-0.837378	5.12811	0.000363056	0.0121231
ENSG00000110042	23220	DTX4	-0.83342	6.30129	0.00136116	0.0262497
ENSG00000124574	89845	ABCC10	-0.831874	4.81906	0.000140927	0.00707418
ENSG00000171298	2548	GAA	-0.831583	7.43416	0.00112292	0.0233951
ENSG00000149582	84866	TMEM25	-0.827783	5.38039	0.00112954	0.023413
ENSG00000103319	29904	EEF2K	-0.824764	5.21149	0.000125534	0.00670404
ENSG00000137103	51754	TMEM8B	-0.82259	4.41065	0.00229851	0.0370137
ENSG00000132763	25974	MMACHC	-0.821075	3.77307	0.00371217	0.0478135
ENSG00000125347	3659	IRF1	-0.820461	5.98339	0.00111532	0.0233831
ENSG00000175938	93129	ORAI3	-0.817578	6.3847	2.42129e-05	0.00253019
ENSG00000100979	5360	PLTP	-0.816744	8.0531	0.00303617	0.0434329
ENSG00000167716	124997	WDR81	-0.813675	5.09706	0.00337667	0.0456671
ENSG00000131669	4814	NINJ1	-0.813304	7.24376	0.000428237	0.0132471
ENSG00000204366	221527	ZBTB12	-0.811232	3.40692	0.00138593	0.0263521
ENSG00000183779	80139	ZNF703	-0.808665	6.32708	0.0018808	0.0324691
ENSG00000110013	54414	SIAE	-0.807756	6.4442	0.000223688	0.00924172
ENSG00000139832	55647	RAB20	-0.799002	4.95984	0.00107255	0.0228935
ENSG00000206503	3105	HLA-A	-0.79483	9.23443	6.19392e-05	0.00436367
ENSG00000198753	5365	PLXNB3	-0.793838	4.73127	0.00129473	0.0254519
ENSG00000167397	79001	VKORC1	-0.789675	6.90633	0.00032352	0.0112982
ENSG00000196839	100	ADA	-0.789589	6.43954	0.00138963	0.0263812
ENSG00000110328	374378	GALNT18	-0.784635	6.56818	0.00187561	0.0324254
ENSG00000196562	55959	SULF2	-0.783976	6.93056	0.00362725	0.0474855
ENSG00000185033	10509	SEMA4B	-0.783399	7.31796	2.76007e-05	0.0026488
ENSG00000118707	60436	TGIF2	-0.776675	5.39518	8.62713e-05	0.00531048
ENSG00000141574	6398	SECTM1	-0.774987	5.03991	0.00329815	0.0452678
ENSG00000242299	100131863	RPS18P5	-0.772413	5.80869	0.00269106	0.0403924
ENSG00000226137	440465	BAIAP2-DT	-0.769474	5.13991	0.000777723	0.0189958
ENSG00000149483	51524	TMEM138	-0.768538	6.17835	6.34563e-05	0.00442635
ENSG00000005882	5164	PDK2	-0.767658	5.36918	0.00101621	0.0224271
ENSG00000033100	54480	CHPF2	-0.766135	7.01404	0.000275116	0.0105113
ENSG00000188559	57186	RALGAPA2	-0.763598	5.43995	0.000706783	0.0181289
ENSG00000130821	6535	SLC6A8	-0.761361	7.14941	4.57358e-05	0.00366729
ENSG00000132199	55556	ENOSF1	-0.760464	4.42428	0.00365323	0.0476725
ENSG00000094841	139596	UPRT	-0.76044	4.54051	0.00134487	0.0260547
ENSG00000170266	2720	GLB1	-0.756844	6.83847	0.000690661	0.0179483
ENSG00000008838	9862	MED24	-0.752721	5.9734	0.00102153	0.0224331
ENSG00000103876	2184	FAH	-0.750615	6.11921	0.00318163	0.0445721
ENSG00000198467	7169	TPM2	-0.749359	7.50599	0.000473094	0.0142997
ENSG00000196459	6399	TRAPPC2	-0.746988	4.43687	0.00170474	0.0302877
ENSG00000103174	51172	NAGPA	-0.746517	4.73442	0.00308802	0.0436351
ENSG00000068001	8692	HYAL2	-0.746271	6.65576	0.00181236	0.0315628
ENSG00000197903	85236	H2BC12	-0.74113	7.31036	7.96295e-05	0.00506961
ENSG00000158373	3017	H2BC5	-0.739729	6.82943	0.000127765	0.00677041
ENSG00000049541	5982	RFC2	-0.733631	5.16252	0.00256211	0.0393793
ENSG00000044090	9820	CUL7	-0.727204	5.55351	0.00225457	0.0367845
ENSG00000106009	221927	BRAT1	-0.724123	5.62466	0.00280079	0.0414776
ENSG00000027847	11285	B4GALT7	-0.721528	6.27171	0.00243646	0.0382674
ENSG00000109472	1363	CPE	-0.717491	6.87344	0.00254627	0.0392835
ENSG00000000003	7105	TSPAN6	-0.715125	6.43548	0.0020157	0.033886
ENSG00000121691	847	CAT	-0.711832	6.93835	9.31534e-05	0.00551276
ENSG00000162337	4041	LRP5	-0.706624	6.3946	0.00337454	0.0456671
ENSG00000164442	10370	CITED2	-0.70573	6.97184	9.60071e-05	0.00559873
ENSG00000002549	51056	LAP3	-0.704327	6.80775	0.00259342	0.0396097
ENSG00000075240	23151	GRAMD4	-0.70432	6.13529	8.8328e-05	0.00540975
ENSG00000046647	54960	GEMIN8	-0.704281	4.93573	0.0012587	0.0248638
ENSG00000021762	114879	OSBPL5	-0.702788	4.85976	0.00153529	0.0283193
ENSG00000110492	4192	MDK	-0.701679	8.52058	0.00170211	0.0302852
ENSG00000160408	30815	ST6GALNAC6	-0.699261	6.29146	0.00248986	0.0387177
ENSG00000077585	7107	GPR137B	-0.695212	5.62225	0.00230197	0.0370137
ENSG00000160055	56063	TMEM234	-0.693582	5.15539	0.00296099	0.0425572
ENSG00000106049	11112	HIBADH	-0.688324	6.44636	0.000195509	0.00842003
ENSG00000136280	83605	CCM2	-0.68666	6.42611	0.00392838	0.0495643
ENSG00000135677	2799	GNS	-0.686276	6.69883	0.000503417	0.0146786
ENSG00000182197	2131	EXT1	-0.685417	6.87364	0.00108892	0.0230813
ENSG00000084693	60509	AGBL5	-0.684171	6.08128	0.000453563	0.0138201
ENSG00000059573	5832	ALDH18A1	-0.680672	6.71438	0.00108858	0.0230813
ENSG00000003056	4074	M6PR	-0.677374	7.27187	1.38424e-05	0.00186827
ENSG00000174938	26470	SEZ6L2	-0.675264	5.2456	0.00263983	0.039968
ENSG00000124098	116151	FAM210B	-0.672701	6.95295	0.00054434	0.0154289
ENSG00000097007	25	ABL1	-0.670431	6.55019	0.000169363	0.00777861
ENSG00000170425	136	ADORA2B	-0.670293	6.07901	0.0037008	0.0477708
ENSG00000058799	54432	YIPF1	-0.669782	5.94275	0.000842066	0.0200843
ENSG00000163795	130557	ZNF513	-0.669737	5.49891	0.00337158	0.0456671
ENSG00000100109	24144	TFIP11	-0.669413	5.4829	0.000627186	0.0169493
ENSG00000103150	23417	MLYCD	-0.661141	4.83583	0.00225298	0.0367845
ENSG00000176165	2290	FOXG1	-0.660207	5.86129	0.00104041	0.0226439
ENSG00000079999	9817	KEAP1	-0.657012	6.51215	0.0019766	0.0335516
ENSG00000144455	285362	SUMF1	-0.656382	6.93583	0.000392346	0.012584
ENSG00000144455	100130207	LOC100130207	-0.656382	6.93583	0.000392346	0.012584
ENSG00000116171	6342	SCP2	-0.651017	6.87533	0.000194292	0.00842003
ENSG00000152240	115106	HAUS1	-0.645312	5.25742	0.00345228	0.0460355
ENSG00000119977	26123	TCTN3	-0.638921	6.31656	0.000166757	0.00772788
ENSG00000139182	9746	CLSTN3	-0.635955	6.16261	0.00289967	0.0420728
ENSG00000197162	146540	ZNF785	-0.630399	3.65048	0.00307418	0.0436219
ENSG00000105223	23646	PLD3	-0.628782	8.14707	0.000101531	0.00575565
ENSG00000109113	83871	RAB34	-0.627528	6.03637	0.000516863	0.0148727
ENSG00000124006	23363	OBSL1	-0.625334	5.23227	0.00217141	0.0357434
ENSG00000175782	55508	SLC35E3	-0.624564	4.34082	0.00228684	0.0370137
ENSG00000089057	9962	SLC23A2	-0.613641	4.94249	0.000981844	0.0219667
ENSG00000169047	3667	IRS1	-0.60947	6.32973	0.0030625	0.0436219
ENSG00000103356	124454	EARS2	-0.608344	5.16408	0.00249054	0.0387177
ENSG00000119688	5826	ABCD4	-0.605094	4.86555	0.000859341	0.0203869
ENSG00000124177	84181	CHD6	-0.603878	5.40199	0.00118695	0.0240708
ENSG00000117419	79033	ERI3	-0.603407	6.26175	0.000312575	0.0111463
ENSG00000166710	567	B2M	-0.602429	8.69729	0.00133067	0.0259077
ENSG00000102699	143	PARP4	-0.601837	6.95661	0.000301293	0.0108966
ENSG00000236552	728658	RPL13AP5	-0.600133	6.19958	0.00283553	0.0416881
ENSG00000164733	1508	CTSB	-0.599547	8.32629	0.000552697	0.0155932
ENSG00000178234	63917	GALNT11	-0.598642	5.89989	0.000397695	0.0126309
ENSG00000138834	23162	MAPK8IP3	-0.592647	6.49086	0.00376767	0.048185

## Sheet: Common DGEs 
Upregulated Genes	Downregulated Genes
SULT2B1	BPIFB1
DMKN	IDO1
TPPP	KCNE3
OLMALINC	TGM2
ACYP1	CXCL6
CYP2S1	CYP4X1
NOMO2	CHST2
LOC102723728	LINC02984
FAHD2A	CSF1
	RAB37
	HLA-DMA
	LOX
	NCMAP
	HLA-DRB1
	TLR2
	CD74
	CREB3L1
	CD36
	TAPBPL
	ENPP4
	SLC40A1
	GBP2
	RDH10
	ARL4C
	DUOXA2
	NPL
	HLA-B
	IRAK3
	HCP5
	FER1L6
	FBP1
	HPGD
	ABCA1
	DPYD
	HS3ST1
	SPDEF
	LOXL1
	DRAM1
	PLIN2
	F2R
	PLAAT4
	FAM3D
	SLC15A2
	CXCL1
	FUT8
	TENT5A
	IL1R1
	GALNT12
	IGFBP3
	MYLIP
	CTSO
	SNTA1
	PLA2R1
	TNFSF10
	CPD
	MARCKSL1
	HAS3
	STS
	RARB
	TGFBR2
	PSMB8
	GALNT10
	NAGLU
	FAM110C
	IRF1
	SECTM1
	UPRT
	YIPF1
	B2M
